# Supplementary material for: Astrocyte-Derived Small Extracellular Vesicles Regulate Dendritic Complexity through miR-26a-5p Activity
Source: Preprints.org preprint supplement (doi:10.20944/preprints202002.0250.v1), 2020-02-17
Supplement: Supplementary file 3 [file mirecords146a.xls]

# "1" : interaction predicted; "0" : interaction not predicted.
miRNA ID	miRNA Acc	Refseq	Symbol	Description	diana	microinspector	miranda	mirtarget2	mitarget	nbmirtar	pictar	pita	rna22	rnahybrid	targetscan
hsa-miR-146a	MIMAT0000449	NM_006537	USP3	ubiquitin specific peptidase 3	0	0	1	1	0	0	1	1	0	1	1
hsa-miR-146a	MIMAT0000449	NM_005639	SYT1	synaptotagmin I	0	0	1	1	0	0	1	1	0	1	1
hsa-miR-146a	MIMAT0000449	NM_173510	CCDC117	coiled-coil domain containing 117	0	0	1	1	0	0	1	1	0	1	1
hsa-miR-146a	MIMAT0000449	NM_001005366	FBXL10	F-box and leucine-rich repeat protein 10	0	0	1	1	0	0	1	1	0	1	1
hsa-miR-146a	MIMAT0000449	NM_021946	BCORL1	BCL6 co-repressor-like 1	0	0	1	1	0	0	1	1	0	1	1
hsa-miR-146a	MIMAT0000449	NM_024567	HMBOX1	homeobox containing 1	0	0	1	1	0	0	1	1	0	1	1
hsa-miR-146a	MIMAT0000449	NM_001390	DTNA	dystrobrevin, alpha	0	0	1	1	0	0	1	1	0	1	1
hsa-miR-146a	MIMAT0000449	NM_006275	SFRS6	splicing factor, arginine/serine-rich 6	0	0	1	1	0	0	1	1	0	1	1
hsa-miR-146a	MIMAT0000449	NM_005359	SMAD4	SMAD family member 4	0	0	1	1	0	0	1	1	0	1	1
hsa-miR-146a	MIMAT0000449	NM_002515	NOVA1	neuro-oncological ventral antigen 1	0	0	1	1	0	0	1	1	0	1	1
hsa-miR-146a	MIMAT0000449	NM_020956	PRX	periaxin	0	0	1	0	0	0	1	1	0	1	1
hsa-miR-146a	MIMAT0000449	NM_144642	SYNPR	synaptoporin	0	0	1	0	0	0	1	1	0	1	1
hsa-miR-146a	MIMAT0000449	NM_002959	SORT1	sortilin 1	0	0	1	0	0	0	1	1	0	1	1
hsa-miR-146a	MIMAT0000449	NM_024076	KCTD15	potassium channel tetramerisation domain containing 15	0	0	1	0	0	0	1	1	0	1	1
hsa-miR-146a	MIMAT0000449	NM_020713	ZNF512B	zinc finger protein 512B	0	0	1	0	0	0	1	1	0	1	1
hsa-miR-146a	MIMAT0000449	NM_002809	PSMD3	proteasome (prosome, macropain) 26S subunit, non-ATPase, 3	0	0	0	1	0	0	1	1	0	1	1
hsa-miR-146a	MIMAT0000449	NM_175635	RUNX1T1	runt-related transcription factor 1; translocated to, 1 (cyclin D-related)	0	0	1	1	0	0	1	1	0	1	0
hsa-miR-146a	MIMAT0000449	NM_001025242	IRAK1	interleukin-1 receptor-associated kinase 1	0	0	1	1	0	0	0	1	0	1	1
hsa-miR-146a	MIMAT0000449	NM_017693	BIVM	basic, immunoglobulin-like variable motif containing	0	0	1	0	0	0	1	1	0	1	1
hsa-miR-146a	MIMAT0000449	NM_130830	LRRC15	leucine rich repeat containing 15	0	0	1	0	0	0	1	1	0	1	1
hsa-miR-146a	MIMAT0000449	NM_133646	ZAK	sterile alpha motif and leucine zipper containing kinase AZK	0	0	1	0	0	0	1	1	0	1	1
hsa-miR-146a	MIMAT0000449	NM_003155	STC1	stanniocalcin 1	0	0	1	0	0	0	1	1	0	1	1
hsa-miR-146a	MIMAT0000449	NM_007190	SEC23IP	SEC23 interacting protein	0	0	1	0	0	0	1	1	0	1	1
hsa-miR-146a	MIMAT0000449	NM_024563	C5orf23	chromosome 5 open reading frame 23	0	0	1	0	0	0	1	1	0	1	1
hsa-miR-146a	MIMAT0000449	NM_001569	IRAK1	interleukin-1 receptor-associated kinase 1	0	0	1	1	0	0	1	1	0	1	0
hsa-miR-146a	MIMAT0000449	NM_006940	SOX5	SRY (sex determining region Y)-box 5	0	0	1	0	0	0	1	1	0	1	1
hsa-miR-146a	MIMAT0000449	NM_006489	NOVA1	neuro-oncological ventral antigen 1	0	0	1	1	0	0	1	1	0	1	0
hsa-miR-146a	MIMAT0000449	NM_002581	PAPPA	pregnancy-associated plasma protein A, pappalysin 1	0	0	1	0	0	0	1	1	0	1	1
hsa-miR-146a	MIMAT0000449	NM_002587	PCDH1	protocadherin 1	0	0	1	1	0	0	1	1	0	1	0
hsa-miR-146a	MIMAT0000449	NM_003559	PIP4K2B	phosphatidylinositol-5-phosphate 4-kinase, type II, beta	0	0	1	0	0	0	1	1	0	1	1
hsa-miR-146a	MIMAT0000449	NM_003924	PHOX2B	paired-like homeobox 2b	0	0	1	0	0	0	1	1	0	1	1
hsa-miR-146a	MIMAT0000449	NM_003951	SLC25A14	solute carrier family 25 (mitochondrial carrier, brain), member 14	0	0	1	0	0	0	1	1	0	1	1
hsa-miR-146a	MIMAT0000449	NM_182700	SP8	Sp8 transcription factor	0	0	1	0	0	0	1	1	0	1	1
hsa-miR-146a	MIMAT0000449	NM_004620	TRAF6	TNF receptor-associated factor 6	0	0	0	1	0	0	1	1	0	1	1
hsa-miR-146a	MIMAT0000449	NM_004349	RUNX1T1	runt-related transcription factor 1; translocated to, 1 (cyclin D-related)	0	0	0	1	0	0	1	1	0	1	1
hsa-miR-146a	MIMAT0000449	NM_015336	ZDHHC17	zinc finger, DHHC-type containing 17	0	0	1	0	0	0	1	1	0	1	1
hsa-miR-146a	MIMAT0000449	NM_017759	FLJ20309	hypothetical protein FLJ20309	0	0	1	0	0	0	1	1	0	1	1
hsa-miR-146a	MIMAT0000449	NM_016131	RAB10	RAB10, member RAS oncogene family	0	0	1	0	0	0	1	1	0	1	1
hsa-miR-146a	MIMAT0000449	NM_032980	DTNA	dystrobrevin, alpha	0	0	1	1	0	0	1	1	0	1	0
hsa-miR-146a	MIMAT0000449	NM_199324	OTUD4	OTU domain containing 4	0	0	1	0	0	0	1	1	0	1	1
hsa-miR-146a	MIMAT0000449	NM_000461	THRB	thyroid hormone receptor, beta (erythroblastic leukemia viral (v-erb-a) oncogene homolog 2, avian)	0	0	1	1	0	0	0	1	0	1	1
hsa-miR-146a	MIMAT0000449	NM_032975	DTNA	dystrobrevin, alpha	0	0	1	1	0	0	1	1	0	1	0
hsa-miR-146a	MIMAT0000449	NM_016487	C6orf203	chromosome 6 open reading frame 203	0	0	1	1	0	0	1	1	0	1	0
hsa-miR-146a	MIMAT0000449	NM_003688	CASK	calcium/calmodulin-dependent serine protein kinase (MAGUK family)	0	0	1	1	0	0	0	1	0	1	1
hsa-miR-146a	MIMAT0000449	NM_001003810	HNRNPD	heterogeneous nuclear ribonucleoprotein D (AU-rich element RNA binding protein 1, 37kDa)	0	0	1	1	0	0	0	1	0	1	1
hsa-miR-146a	MIMAT0000449	NM_004177	STX3	syntaxin 3	0	0	1	0	0	0	1	1	0	1	1
hsa-miR-146a	MIMAT0000449	NM_178864	NPAS4	neuronal PAS domain protein 4	0	0	1	0	0	0	1	1	0	1	1
hsa-miR-146a	MIMAT0000449	NM_004430	EGR3	early growth response 3	0	0	1	0	0	0	1	1	0	1	1
hsa-miR-146a	MIMAT0000449	NM_018387	STRBP	spermatid perinuclear RNA binding protein	0	0	0	1	0	0	1	1	0	1	1
hsa-miR-146a	MIMAT0000449	NM_025059	C6orf97	chromosome 6 open reading frame 97	0	0	1	1	0	0	0	1	0	1	0
hsa-miR-146a	MIMAT0000449	NM_024408	NOTCH2	Notch homolog 2 (Drosophila)	0	0	1	1	0	0	0	1	0	1	0
hsa-miR-146a	MIMAT0000449	NM_030674	SLC38A1	solute carrier family 38, member 1	0	0	1	1	0	0	0	1	0	1	0
hsa-miR-146a	MIMAT0000449	NM_030650	KIAA1715	KIAA1715	0	0	1	1	0	0	0	1	0	1	0
hsa-miR-146a	MIMAT0000449	NM_032510	PARD6G	par-6 partitioning defective 6 homolog gamma (C. elegans)	0	0	1	1	0	0	0	1	0	1	0
hsa-miR-146a	MIMAT0000449	NM_024949	WWC2	WW and C2 domain containing 2	0	0	1	1	0	0	0	1	0	1	0
hsa-miR-146a	MIMAT0000449	NM_025243	SLC19A3	solute carrier family 19, member 3	0	0	1	1	0	0	0	1	0	1	0
hsa-miR-146a	MIMAT0000449	NM_031370	HNRNPD	heterogeneous nuclear ribonucleoprotein D (AU-rich element RNA binding protein 1, 37kDa)	0	0	1	1	0	0	0	1	0	1	0
hsa-miR-146a	MIMAT0000449	NM_017933	PID1	phosphotyrosine interaction domain containing 1	0	0	1	1	0	0	0	1	0	1	0
hsa-miR-146a	MIMAT0000449	NM_024798	SNX22	sorting nexin 22	0	0	1	0	0	0	0	1	0	1	1
hsa-miR-146a	MIMAT0000449	NM_032494	ZC3H8	zinc finger CCCH-type containing 8	0	0	1	1	0	0	0	1	0	1	0
hsa-miR-146a	MIMAT0000449	NM_024674	LIN28	lin-28 homolog (C. elegans)	0	0	0	0	0	0	1	1	0	1	1
hsa-miR-146a	MIMAT0000449	NM_030762	BHLHB3	basic helix-loop-helix domain containing, class B, 3	0	0	1	1	0	0	0	1	0	1	0
hsa-miR-146a	MIMAT0000449	NM_031483	ITCH	itchy E3 ubiquitin protein ligase homolog (mouse)	0	0	1	1	0	0	0	1	0	1	0
hsa-miR-146a	MIMAT0000449	NM_032424	KIAA1826	KIAA1826	0	0	1	1	0	0	0	1	0	1	0
hsa-miR-146a	MIMAT0000449	NM_023075	MPPE1	metallophosphoesterase 1	0	0	0	0	0	0	1	1	0	1	1
hsa-miR-146a	MIMAT0000449	NM_020163	SEMA3G	sema domain, immunoglobulin domain (Ig), short basic domain, secreted, (semaphorin) 3G	0	0	0	0	0	0	1	1	0	1	1
hsa-miR-146a	MIMAT0000449	NM_019117	KLHL4	kelch-like 4 (Drosophila)	0	0	1	1	0	0	0	1	0	1	0
hsa-miR-146a	MIMAT0000449	NM_019022	TXNDC10	thioredoxin domain containing 10	0	0	1	1	0	0	0	1	0	1	0
hsa-miR-146a	MIMAT0000449	NM_018689	KIAA1199	KIAA1199	0	0	1	1	0	0	0	1	0	1	0
hsa-miR-146a	MIMAT0000449	NM_018650	MARK1	MAP/microtubule affinity-regulating kinase 1	0	0	1	1	0	0	0	1	0	1	0
hsa-miR-146a	MIMAT0000449	NM_018462	C3orf10	chromosome 3 open reading frame 10	0	0	1	1	0	0	0	1	0	1	0
hsa-miR-146a	MIMAT0000449	NM_018362	LIN7C	lin-7 homolog C (C. elegans)	0	0	1	1	0	0	0	1	0	1	0
hsa-miR-146a	MIMAT0000449	NM_018325	C9orf72	chromosome 9 open reading frame 72	0	0	1	1	0	0	0	1	0	1	0
hsa-miR-146a	MIMAT0000449	NM_018279	TMEM19	transmembrane protein 19	0	0	1	1	0	0	0	1	0	1	0
hsa-miR-146a	MIMAT0000449	NM_018181	ZNF532	zinc finger protein 532	0	0	1	0	0	0	0	1	0	1	1
hsa-miR-146a	MIMAT0000449	NM_018109	PAPD1	PAP associated domain containing 1	0	0	1	1	0	0	0	1	0	1	0
hsa-miR-146a	MIMAT0000449	NM_017944	USP47	ubiquitin specific peptidase 47	0	0	1	1	0	0	0	1	0	1	0
hsa-miR-146a	MIMAT0000449	NM_017744	ST7L	suppression of tumorigenicity 7 like	0	0	1	1	0	0	0	1	0	1	0
hsa-miR-146a	MIMAT0000449	NM_017655	GIPC2	GIPC PDZ domain containing family, member 2	0	0	1	1	0	0	0	1	0	1	0
hsa-miR-146a	MIMAT0000449	NM_016548	GOLM1	golgi membrane protein 1	0	0	1	1	0	0	0	1	0	1	0
hsa-miR-146a	MIMAT0000449	NM_020182	PMEPA1	prostate transmembrane protein, androgen induced 1	0	0	1	1	0	0	0	1	0	1	0
hsa-miR-146a	MIMAT0000449	NM_020205	OTUD7B	OTU domain containing 7B	0	0	0	0	0	0	1	1	0	1	1
hsa-miR-146a	MIMAT0000449	NM_020662	MRS2	MRS2 magnesium homeostasis factor homolog (S. cerevisiae)	0	0	1	1	0	0	0	1	0	1	0
hsa-miR-146a	MIMAT0000449	NM_023074	ZNF649	zinc finger protein 649	0	0	1	1	0	0	0	1	0	1	0
hsa-miR-146a	MIMAT0000449	NM_022893	BCL11A	B-cell CLL/lymphoma 11A (zinc finger protein)	0	0	0	0	0	0	1	1	0	1	1
hsa-miR-146a	MIMAT0000449	NM_022841	RFXDC2	regulatory factor X domain containing 2	0	0	0	1	0	0	0	1	0	1	1
hsa-miR-146a	MIMAT0000449	NM_022810	SLC25A14	solute carrier family 25 (mitochondrial carrier, brain), member 14	0	0	1	0	0	0	1	1	0	1	0
hsa-miR-146a	MIMAT0000449	NM_021964	ZNF148	zinc finger protein 148	0	0	1	0	0	0	0	1	0	1	1
hsa-miR-146a	MIMAT0000449	NM_021947	SRR	serine racemase	0	0	0	0	0	0	1	1	0	1	1
hsa-miR-146a	MIMAT0000449	NM_021260	ZFYVE1	zinc finger, FYVE domain containing 1	0	0	0	0	0	0	1	1	0	1	1
hsa-miR-146a	MIMAT0000449	NM_021127	PMAIP1	phorbol-12-myristate-13-acetate-induced protein 1	0	0	1	1	0	0	0	1	0	1	0
hsa-miR-146a	MIMAT0000449	NM_021047	ZNF253	zinc finger protein 253	0	0	1	1	0	0	0	1	0	1	0
hsa-miR-146a	MIMAT0000449	NM_020861	ZBTB2	zinc finger and BTB domain containing 2	0	0	1	1	0	0	0	1	0	1	0
hsa-miR-146a	MIMAT0000449	NM_020825	CRAMP1L	Crm, cramped-like (Drosophila)	0	0	1	1	0	0	0	1	0	1	0
hsa-miR-146a	MIMAT0000449	NM_020440	PTGFRN	prostaglandin F2 receptor negative regulator	0	0	0	0	0	0	1	1	0	1	1
hsa-miR-146a	MIMAT0000449	NM_020390	EIF5A2	eukaryotic translation initiation factor 5A2	0	0	0	0	0	0	1	1	0	1	1
hsa-miR-146a	MIMAT0000449	NM_020353	PLSCR4	phospholipid scramblase 4	0	0	1	1	0	0	0	1	0	1	0
hsa-miR-146a	MIMAT0000449	NM_016530	RAB8B	RAB8B, member RAS oncogene family	0	0	1	1	0	0	0	1	0	1	0
hsa-miR-146a	MIMAT0000449	NM_207366	SEPT14	septin 14	0	0	1	1	0	0	0	1	0	1	0
hsa-miR-146a	MIMAT0000449	NM_181829	NF2	neurofibromin 2 (merlin)	0	0	1	0	0	0	1	1	0	1	0
hsa-miR-146a	MIMAT0000449	NM_181828	NF2	neurofibromin 2 (merlin)	0	0	1	0	0	0	1	1	0	1	0
hsa-miR-146a	MIMAT0000449	NM_181358	HIPK1	homeodomain interacting protein kinase 1	0	0	0	0	0	0	1	1	0	1	1
hsa-miR-146a	MIMAT0000449	NM_178586	PPP2R5C	protein phosphatase 2, regulatory subunit B", gamma isoform	0	0	1	1	0	0	0	1	0	1	0
hsa-miR-146a	MIMAT0000449	NM_178010	SOX5	SRY (sex determining region Y)-box 5	0	0	1	0	0	0	1	1	0	1	0
hsa-miR-146a	MIMAT0000449	NM_176083	TRDMT1	tRNA aspartic acid methyltransferase 1	0	0	1	1	0	0	0	1	0	1	0
hsa-miR-146a	MIMAT0000449	NM_176081	TRDMT1	tRNA aspartic acid methyltransferase 1	0	0	1	1	0	0	0	1	0	1	0
hsa-miR-146a	MIMAT0000449	NM_175736	FMNL3	formin-like 3	0	0	1	1	0	0	0	1	0	1	0
hsa-miR-146a	MIMAT0000449	NM_175636	RUNX1T1	runt-related transcription factor 1; translocated to, 1 (cyclin D-related)	0	0	0	1	0	0	1	1	0	1	0
hsa-miR-146a	MIMAT0000449	NM_175634	RUNX1T1	runt-related transcription factor 1; translocated to, 1 (cyclin D-related)	0	0	0	1	0	0	1	1	0	1	0
hsa-miR-146a	MIMAT0000449	NM_175061	JAZF1	JAZF zinc finger 1	0	0	0	0	0	0	1	1	0	1	1
hsa-miR-146a	MIMAT0000449	NM_173812	DPY19L2	dpy-19-like 2 (C. elegans)	0	0	1	1	0	0	0	1	0	1	0
hsa-miR-146a	MIMAT0000449	NM_173468	MOBKL1A	MOB1, Mps One Binder kinase activator-like 1A (yeast)	0	0	1	1	0	0	0	1	0	1	0
hsa-miR-146a	MIMAT0000449	NM_173214	NFAT5	nuclear factor of activated T-cells 5, tonicity-responsive	0	0	1	0	0	0	1	1	0	1	0
hsa-miR-146a	MIMAT0000449	NM_170768	ZFP91-CNTF	ZFP91-CNTF	0	0	1	1	0	0	0	1	0	1	0
hsa-miR-146a	MIMAT0000449	NM_181830	NF2	neurofibromin 2 (merlin)	0	0	1	0	0	0	1	1	0	1	0
hsa-miR-146a	MIMAT0000449	NM_181832	NF2	neurofibromin 2 (merlin)	0	0	1	0	0	0	1	1	0	1	0
hsa-miR-146a	MIMAT0000449	NM_205833	IGSF1	immunoglobulin superfamily, member 1	0	0	1	0	0	0	1	1	0	1	0
hsa-miR-146a	MIMAT0000449	NM_201266	NRP2	neuropilin 2	0	0	1	0	0	0	1	1	0	1	0
hsa-miR-146a	MIMAT0000449	NM_199170	PMEPA1	prostate transmembrane protein, androgen induced 1	0	0	1	1	0	0	0	1	0	1	0
hsa-miR-146a	MIMAT0000449	NM_198956	SP8	Sp8 transcription factor	0	0	1	0	0	0	1	1	0	1	0
hsa-miR-146a	MIMAT0000449	NM_198900	FMNL3	formin-like 3	0	0	1	1	0	0	0	1	0	1	0
hsa-miR-146a	MIMAT0000449	NM_198829	RAC1	ras-related C3 botulinum toxin substrate 1 (rho family, small GTP binding protein Rac1)	0	0	1	1	0	0	0	1	0	1	0
hsa-miR-146a	MIMAT0000449	NM_198504	PAQR9	progestin and adipoQ receptor family member IX	0	0	1	1	0	0	0	1	0	1	0
hsa-miR-146a	MIMAT0000449	NM_198269	HIPK1	homeodomain interacting protein kinase 1	0	0	1	0	0	0	1	1	0	1	0
hsa-miR-146a	MIMAT0000449	NM_198268	HIPK1	homeodomain interacting protein kinase 1	0	0	1	0	0	0	1	1	0	1	0
hsa-miR-146a	MIMAT0000449	NM_198189	COPS8	COP9 constitutive photomorphogenic homolog subunit 8 (Arabidopsis)	0	0	1	1	0	0	0	1	0	1	0
hsa-miR-146a	MIMAT0000449	NM_183238	ZNF605	zinc finger protein 605	0	0	1	1	0	0	0	1	0	1	0
hsa-miR-146a	MIMAT0000449	NM_182643	DLC1	deleted in liver cancer 1	0	0	1	1	0	0	0	1	0	1	0
hsa-miR-146a	MIMAT0000449	NM_182558	C12orf36	chromosome 12 open reading frame 36	0	0	1	1	0	0	0	1	0	1	0
hsa-miR-146a	MIMAT0000449	NM_182529	THAP5	THAP domain containing 5	0	0	1	1	0	0	0	1	0	1	0
hsa-miR-146a	MIMAT0000449	NM_181833	NF2	neurofibromin 2 (merlin)	0	0	1	0	0	0	1	1	0	1	0
hsa-miR-146a	MIMAT0000449	NM_153262	SYT14	synaptotagmin XIV	0	0	1	1	0	0	0	1	0	1	0
hsa-miR-146a	MIMAT0000449	NM_153225	RPESP	RPE-spondin	0	0	0	0	0	0	1	1	0	1	1
hsa-miR-146a	MIMAT0000449	NM_138350	THAP3	THAP domain containing, apoptosis associated protein 3	0	0	0	0	0	0	1	1	0	1	1
hsa-miR-146a	MIMAT0000449	NM_130435	PTPRE	protein tyrosine phosphatase, receptor type, E	0	0	1	1	0	0	0	1	0	1	0
hsa-miR-146a	MIMAT0000449	NM_080841	PTPRA	protein tyrosine phosphatase, receptor type, A	0	0	1	0	0	0	1	1	0	1	0
hsa-miR-146a	MIMAT0000449	NM_080840	PTPRA	protein tyrosine phosphatase, receptor type, A	0	0	1	0	0	0	1	1	0	1	0
hsa-miR-146a	MIMAT0000449	NM_078470	COX15	COX15 homolog, cytochrome c oxidase assembly protein (yeast)	0	0	1	1	0	0	0	1	0	1	0
hsa-miR-146a	MIMAT0000449	NM_058230	ZNF354B	zinc finger protein 354B	0	0	1	1	0	0	0	1	0	1	0
hsa-miR-146a	MIMAT0000449	NM_057162	KLHL4	kelch-like 4 (Drosophila)	0	0	1	1	0	0	0	1	0	1	0
hsa-miR-146a	MIMAT0000449	NM_052864	TIFA	TRAF-interacting protein with forkhead-associated domain	0	0	1	1	0	0	0	1	0	1	0
hsa-miR-146a	MIMAT0000449	NM_052834	WDR7	WD repeat domain 7	0	0	1	1	0	0	0	1	0	1	0
hsa-miR-146a	MIMAT0000449	NM_033625	RPL34	ribosomal protein L34	0	0	1	1	0	0	0	1	0	1	0
hsa-miR-146a	MIMAT0000449	NM_033484	FBXO4	F-box protein 4	0	0	1	1	0	0	0	1	0	1	0
hsa-miR-146a	MIMAT0000449	NM_033338	CASP7	caspase 7, apoptosis-related cysteine peptidase	0	0	1	1	0	0	0	1	0	1	0
hsa-miR-146a	MIMAT0000449	NM_033207	OPALIN	oligodendrocytic myelin paranodal and inner loop protein	0	0	1	1	0	0	0	1	0	1	0
hsa-miR-146a	MIMAT0000449	NM_033093	TRIM5	tripartite motif-containing 5	0	0	1	1	0	0	0	1	0	1	0
hsa-miR-146a	MIMAT0000449	NM_033034	TRIM5	tripartite motif-containing 5	0	0	1	1	0	0	0	1	0	1	0
hsa-miR-146a	MIMAT0000449	NM_138440	VASN	vasorin	0	0	0	0	0	0	1	1	0	1	1
hsa-miR-146a	MIMAT0000449	NM_138713	NFAT5	nuclear factor of activated T-cells 5, tonicity-responsive	0	0	1	0	0	0	1	1	0	1	0
hsa-miR-146a	MIMAT0000449	NM_153184	CADM2	cell adhesion molecule 2	0	0	1	1	0	0	0	1	0	1	0
hsa-miR-146a	MIMAT0000449	NM_152866	MS4A1	membrane-spanning 4-domains, subfamily A, member 1	0	0	1	1	0	0	0	1	0	1	0
hsa-miR-146a	MIMAT0000449	NM_152695	ZNF449	zinc finger protein 449	0	0	1	1	0	0	0	1	0	1	0
hsa-miR-146a	MIMAT0000449	NM_152527	SLC16A14	solute carrier family 16, member 14 (monocarboxylic acid transporter 14)	0	0	1	1	0	0	0	1	0	1	0
hsa-miR-146a	MIMAT0000449	NM_152391	PQLC3	PQ loop repeat containing 3	0	0	1	1	0	0	0	1	0	1	0
hsa-miR-146a	MIMAT0000449	NM_145803	TRAF6	TNF receptor-associated factor 6	0	0	0	1	0	0	1	1	0	1	0
hsa-miR-146a	MIMAT0000449	NM_145059	FUK	fucokinase	0	0	0	0	0	0	1	1	0	1	1
hsa-miR-146a	MIMAT0000449	NM_144770	RBM11	RNA binding motif protein 11	0	0	1	1	0	0	0	1	0	1	0
hsa-miR-146a	MIMAT0000449	NM_144693	ZNF558	zinc finger protein 558	0	0	1	1	0	0	0	1	0	1	0
hsa-miR-146a	MIMAT0000449	NM_144660	SAMD8	sterile alpha motif domain containing 8	0	0	0	0	0	0	1	1	0	1	1
hsa-miR-146a	MIMAT0000449	NM_144628	TBC1D20	TBC1 domain family, member 20	0	0	1	1	0	0	0	1	0	1	0
hsa-miR-146a	MIMAT0000449	NM_139316	AMPH	amphiphysin	0	0	1	1	0	0	0	1	0	1	0
hsa-miR-146a	MIMAT0000449	NM_138728	ST7L	suppression of tumorigenicity 7 like	0	0	1	1	0	0	0	1	0	1	0
hsa-miR-146a	MIMAT0000449	NM_138727	ST7L	suppression of tumorigenicity 7 like	0	0	1	1	0	0	0	1	0	1	0
hsa-miR-146a	MIMAT0000449	NM_138714	NFAT5	nuclear factor of activated T-cells 5, tonicity-responsive	0	0	1	0	0	0	1	1	0	1	0
hsa-miR-146a	MIMAT0000449	NM_032590	FBXL10	F-box and leucine-rich repeat protein 10	0	0	0	1	0	0	1	1	0	1	0
hsa-miR-146a	MIMAT0000449	NM_004170	SLC1A1	solute carrier family 1 (neuronal/epithelial high affinity glutamate transporter, system Xag), member 1	0	0	1	1	0	0	0	1	0	1	0
hsa-miR-146a	MIMAT0000449	NM_002616	PER1	period homolog 1 (Drosophila)	0	0	0	0	0	0	1	1	0	1	1
hsa-miR-146a	MIMAT0000449	NM_002524	NRAS	neuroblastoma RAS viral (v-ras) oncogene homolog	0	0	1	1	0	0	0	1	0	1	0
hsa-miR-146a	MIMAT0000449	NM_002451	MTAP	methylthioadenosine phosphorylase	0	0	1	1	0	0	0	1	0	1	0
hsa-miR-146a	MIMAT0000449	NM_002190	IL17A	interleukin 17A	0	0	1	1	0	0	0	1	0	1	0
hsa-miR-146a	MIMAT0000449	NM_001842	CNTFR	ciliary neurotrophic factor receptor	0	0	0	0	0	0	1	1	0	1	1
hsa-miR-146a	MIMAT0000449	NM_001635	AMPH	amphiphysin	0	0	1	1	0	0	0	1	0	1	0
hsa-miR-146a	MIMAT0000449	NM_001419	ELAVL1	ELAV (embryonic lethal, abnormal vision, Drosophila)-like 1 (Hu antigen R)	0	0	0	0	0	0	1	1	0	1	1
hsa-miR-146a	MIMAT0000449	NM_001316	CSE1L	CSE1 chromosome segregation 1-like (yeast)	0	0	1	1	0	0	0	1	0	1	0
hsa-miR-146a	MIMAT0000449	NM_001286	CLCN6	chloride channel 6	0	0	1	1	0	0	0	1	0	1	0
hsa-miR-146a	MIMAT0000449	NM_001227	CASP7	caspase 7, apoptosis-related cysteine peptidase	0	0	1	1	0	0	0	1	0	1	0
hsa-miR-146a	MIMAT0000449	NM_001190	BCAT2	branched chain aminotransferase 2, mitochondrial	0	0	0	0	0	0	1	1	0	1	1
hsa-miR-146a	MIMAT0000449	NM_001080508	TBX18	T-box 18	0	0	1	1	0	0	0	1	0	1	0
hsa-miR-146a	MIMAT0000449	NM_001080383	GJC1	gap junction protein, gamma 1, 45kDa	0	0	1	1	0	0	0	1	0	1	0
hsa-miR-146a	MIMAT0000449	NM_001079907	ZNF331	zinc finger protein 331	0	0	1	1	0	0	0	1	0	1	0
hsa-miR-146a	MIMAT0000449	NM_001077484	SLC38A1	solute carrier family 38, member 1	0	0	1	1	0	0	0	1	0	1	0
hsa-miR-146a	MIMAT0000449	NM_002704	PPBP	pro-platelet basic protein (chemokine (C-X-C motif) ligand 7)	0	0	1	1	0	0	0	1	0	1	0
hsa-miR-146a	MIMAT0000449	NM_002836	PTPRA	protein tyrosine phosphatase, receptor type, A	0	0	0	0	0	0	1	1	0	1	1
hsa-miR-146a	MIMAT0000449	NM_004093	EFNB2	ephrin-B2	0	0	0	0	0	0	1	1	0	1	1
hsa-miR-146a	MIMAT0000449	NM_003913	PRPF4B	PRP4 pre-mRNA processing factor 4 homolog B (yeast)	0	0	1	0	0	0	0	1	0	1	1
hsa-miR-146a	MIMAT0000449	NM_003872	NRP2	neuropilin 2	0	0	0	0	0	0	1	1	0	1	1
hsa-miR-146a	MIMAT0000449	NM_003870	IQGAP1	IQ motif containing GTPase activating protein 1	0	0	1	1	0	0	0	1	0	1	0
hsa-miR-146a	MIMAT0000449	NM_003861	WDR22	WD repeat domain 22	0	0	1	1	0	0	0	1	0	1	0
hsa-miR-146a	MIMAT0000449	NM_003709	KLF7	Kruppel-like factor 7 (ubiquitous)	0	0	0	0	0	0	1	1	0	1	1
hsa-miR-146a	MIMAT0000449	NM_000046	ARSB	arylsulfatase B	0	0	1	1	0	0	0	1	0	1	0
hsa-miR-146a	MIMAT0000449	NM_003563	SPOP	speckle-type POZ protein	0	0	1	1	0	0	0	1	0	1	0
hsa-miR-146a	MIMAT0000449	NM_003558	PIP5K1B	phosphatidylinositol-4-phosphate 5-kinase, type I, beta	0	0	0	0	0	0	1	1	0	1	1
hsa-miR-146a	MIMAT0000449	NM_003203	C2orf3	chromosome 2 open reading frame 3	0	0	1	1	0	0	0	1	0	1	0
hsa-miR-146a	MIMAT0000449	NM_003174	SVIL	supervillin	0	0	1	1	0	0	0	1	0	1	0
hsa-miR-146a	MIMAT0000449	NM_003035	STIL	SCL/TAL1 interrupting locus	0	0	1	1	0	0	0	1	0	1	0
hsa-miR-146a	MIMAT0000449	NM_003026	SH3GL2	SH3-domain GRB2-like 2	0	0	0	0	0	0	1	1	0	1	1
hsa-miR-146a	MIMAT0000449	NM_002941	ROBO1	roundabout, axon guidance receptor, homolog 1 (Drosophila)	0	0	0	0	0	0	1	1	0	1	1
hsa-miR-146a	MIMAT0000449	NM_002938	RNF4	ring finger protein 4	0	0	0	0	0	0	1	1	0	1	1
hsa-miR-146a	MIMAT0000449	NM_001048166	STIL	SCL/TAL1 interrupting locus	0	0	1	1	0	0	0	1	0	1	0
hsa-miR-146a	MIMAT0000449	NM_001042599	ERBB4	v-erb-a erythroblastic leukemia viral oncogene homolog 4 (avian)	0	0	1	0	0	0	0	1	0	1	1
hsa-miR-146a	MIMAT0000449	NM_001003716	RECQL5	RecQ protein-like 5	0	0	1	1	0	0	0	1	0	1	0
hsa-miR-146a	MIMAT0000449	NM_001001684	FLJ45831	FLJ45831 protein	0	0	1	1	0	0	0	1	0	1	0
hsa-miR-146a	MIMAT0000449	NM_001001664	SPOPL	speckle-type POZ protein-like	0	0	1	1	0	0	0	1	0	1	0
hsa-miR-146a	MIMAT0000449	NM_001001483	ZDHHC13	zinc finger, DHHC-type containing 13	0	0	1	1	0	0	0	1	0	1	0
hsa-miR-146a	MIMAT0000449	NM_000995	RPL34	ribosomal protein L34	0	0	1	1	0	0	0	1	0	1	0
hsa-miR-146a	MIMAT0000449	NM_000965	RARB	retinoic acid receptor, beta	0	0	0	0	0	0	1	1	0	1	1
hsa-miR-146a	MIMAT0000449	NM_000963	PTGS2	prostaglandin-endoperoxide synthase 2 (prostaglandin G/H synthase and cyclooxygenase)	0	0	1	1	0	0	0	1	0	1	0
hsa-miR-146a	MIMAT0000449	NM_000828	GRIA3	glutamate receptor, ionotrophic, AMPA 3	0	0	1	0	0	0	0	1	0	1	1
hsa-miR-146a	MIMAT0000449	NM_000817	GAD1	glutamate decarboxylase 1 (brain, 67kDa)	0	0	0	0	0	0	1	1	0	1	1
hsa-miR-146a	MIMAT0000449	NM_000806	GABRA1	gamma-aminobutyric acid (GABA) A receptor, alpha 1	0	0	0	0	0	0	1	1	0	1	1
hsa-miR-146a	MIMAT0000449	NM_000729	CCK	cholecystokinin	0	0	1	1	0	0	0	1	0	1	0
hsa-miR-146a	MIMAT0000449	NM_000626	CD79B	CD79b molecule, immunoglobulin-associated beta	0	0	0	0	0	0	1	1	0	1	1
hsa-miR-146a	MIMAT0000449	NM_000533	PLP1	proteolipid protein 1 (Pelizaeus-Merzbacher disease, spastic paraplegia 2, uncomplicated)	0	0	1	0	0	0	0	1	0	1	1
hsa-miR-146a	MIMAT0000449	NM_000293	PHKB	phosphorylase kinase, beta	0	0	1	1	0	0	0	1	0	1	0
hsa-miR-146a	MIMAT0000449	NM_000186	CFH	complement factor H	0	0	1	1	0	0	0	1	0	1	0
hsa-miR-146a	MIMAT0000449	NM_001003809	DLGAP1	discs, large (Drosophila) homolog-associated protein 1	0	0	0	0	0	0	1	1	0	1	1
hsa-miR-146a	MIMAT0000449	NM_001004301	ZNF813	zinc finger protein 813	0	0	1	1	0	0	0	1	0	1	0
hsa-miR-146a	MIMAT0000449	NM_001042559	EIF4G2	eukaryotic translation initiation factor 4 gamma, 2	0	0	0	1	0	0	0	1	0	1	1
hsa-miR-146a	MIMAT0000449	NM_001042549	NSL1	NSL1, MIND kinetochore complex component, homolog (S. cerevisiae)	0	0	1	1	0	0	0	1	0	1	0
hsa-miR-146a	MIMAT0000449	NM_001040103	OPALIN	oligodendrocytic myelin paranodal and inner loop protein	0	0	1	1	0	0	0	1	0	1	0
hsa-miR-146a	MIMAT0000449	NM_001035512	SDHC	succinate dehydrogenase complex, subunit C, integral membrane protein, 15kDa	0	0	1	1	0	0	0	1	0	1	0
hsa-miR-146a	MIMAT0000449	NM_001025077	CUGBP2	CUG triplet repeat, RNA binding protein 2	0	0	1	0	0	0	0	1	0	1	1
hsa-miR-146a	MIMAT0000449	NM_001017992	ACTBL2	actin, beta-like 2	0	0	1	1	0	0	0	1	0	1	0
hsa-miR-146a	MIMAT0000449	NM_001014372	SYT14L	synaptotagmin XIV-like	0	0	1	1	0	0	0	1	0	1	0
hsa-miR-146a	MIMAT0000449	NM_001012968	SPIN4	spindlin family, member 4	0	0	1	1	0	0	0	1	0	1	0
hsa-miR-146a	MIMAT0000449	NM_001010888	ZC3H12B	zinc finger CCCH-type containing 12B	0	0	1	1	0	0	0	1	0	1	0
hsa-miR-146a	MIMAT0000449	NM_001010867	C1orf69	chromosome 1 open reading frame 69	0	0	1	1	0	0	0	1	0	1	0
hsa-miR-146a	MIMAT0000449	NM_001007227	SPOP	speckle-type POZ protein	0	0	1	1	0	0	0	1	0	1	0
hsa-miR-146a	MIMAT0000449	NM_001005744	NUMB	numb homolog (Drosophila)	0	0	1	0	0	0	1	1	0	1	0
hsa-miR-146a	MIMAT0000449	NM_001005743	NUMB	numb homolog (Drosophila)	0	0	0	0	0	0	1	1	0	1	1
hsa-miR-146a	MIMAT0000449	NM_001005739	VPS54	vacuolar protein sorting 54 homolog (S. cerevisiae)	0	0	1	1	0	0	0	1	0	1	0
hsa-miR-146a	MIMAT0000449	NM_001005212	OR9Q1	olfactory receptor, family 9, subfamily Q, member 1	0	0	1	1	0	0	0	1	0	1	0
hsa-miR-146a	MIMAT0000449	NM_000113	TOR1A	torsin family 1, member A (torsin A)	0	0	1	1	0	0	0	1	0	1	0
hsa-miR-146a	MIMAT0000449	NM_016516	VPS54	vacuolar protein sorting 54 homolog (S. cerevisiae)	0	0	1	1	0	0	0	1	0	1	0
hsa-miR-146a	MIMAT0000449	NM_014926	SLITRK3	SLIT and NTRK-like family, member 3	0	0	0	0	0	0	1	1	0	1	1
hsa-miR-146a	MIMAT0000449	NM_014899	RHOBTB3	Rho-related BTB domain containing 3	0	0	1	1	0	0	0	1	0	1	0
hsa-miR-146a	MIMAT0000449	NM_014873	LPGAT1	lysophosphatidylglycerol acyltransferase 1	0	0	1	1	0	0	0	1	0	1	0
hsa-miR-146a	MIMAT0000449	NM_014868	RNF10	ring finger protein 10	0	0	1	1	0	0	0	1	0	1	0
hsa-miR-146a	MIMAT0000449	NM_014773	KIAA0141	KIAA0141	0	0	0	0	0	0	1	1	0	1	1
hsa-miR-146a	MIMAT0000449	NM_014670	BZW1	basic leucine zipper and W2 domains 1	0	0	1	1	0	0	0	1	0	1	0
hsa-miR-146a	MIMAT0000449	NM_014613	UBXD8	UBX domain containing 8	0	0	1	1	0	0	0	1	0	1	0
hsa-miR-146a	MIMAT0000449	NM_014571	HEYL	hairy/enhancer-of-split related with YRPW motif-like	0	0	1	1	0	0	0	1	0	1	0
hsa-miR-146a	MIMAT0000449	NM_014570	ARFGAP3	ADP-ribosylation factor GTPase activating protein 3	0	0	1	1	0	0	0	1	0	1	0
hsa-miR-146a	MIMAT0000449	NM_014518	ZNF229	zinc finger protein 229	0	0	1	1	0	0	0	1	0	1	0
hsa-miR-146a	MIMAT0000449	NM_014494	TNRC6A	trinucleotide repeat containing 6A	0	0	1	0	0	0	0	1	0	1	1
hsa-miR-146a	MIMAT0000449	NM_014437	SLC39A1	solute carrier family 39 (zinc transporter), member 1	0	0	1	1	0	0	0	1	0	1	0
hsa-miR-146a	MIMAT0000449	NM_014243	ADAMTS3	ADAM metallopeptidase with thrombospondin type 1 motif, 3	0	0	0	0	0	0	1	1	0	1	1
hsa-miR-146a	MIMAT0000449	NM_014117	C16orf72	chromosome 16 open reading frame 72	0	0	1	1	0	0	0	1	0	1	0
hsa-miR-146a	MIMAT0000449	NM_013987	PARK2	Parkinson disease (autosomal recessive, juvenile) 2, parkin	0	0	1	1	0	0	0	1	0	1	0
hsa-miR-146a	MIMAT0000449	NM_014951	ZNF365	zinc finger protein 365	0	0	1	0	0	0	0	1	0	1	1
hsa-miR-146a	MIMAT0000449	NM_015032	PDS5B	PDS5, regulator of cohesion maintenance, homolog B (S. cerevisiae)	0	0	1	0	0	0	0	1	0	1	1
hsa-miR-146a	MIMAT0000449	NM_016418	NF2	neurofibromin 2 (merlin)	0	0	1	0	0	0	1	1	0	1	0
hsa-miR-146a	MIMAT0000449	NM_016152	RARB	retinoic acid receptor, beta	0	0	1	0	0	0	1	1	0	1	0
hsa-miR-146a	MIMAT0000449	NM_016018	PHF20L1	PHD finger protein 20-like 1	0	0	1	1	0	0	0	1	0	1	0
hsa-miR-146a	MIMAT0000449	NM_015902	UBR5	ubiquitin protein ligase E3 component n-recognin 5	0	0	1	1	0	0	0	1	0	1	0
hsa-miR-146a	MIMAT0000449	NM_015564	LRRTM2	leucine rich repeat transmembrane neuronal 2	0	0	1	1	0	0	0	1	0	1	0
hsa-miR-146a	MIMAT0000449	NM_015308	FNBP4	formin binding protein 4	0	0	1	1	0	0	0	1	0	1	0
hsa-miR-146a	MIMAT0000449	NM_015294	TRIM37	tripartite motif-containing 37	0	0	1	1	0	0	0	1	0	1	0
hsa-miR-146a	MIMAT0000449	NM_015285	WDR7	WD repeat domain 7	0	0	1	1	0	0	0	1	0	1	0
hsa-miR-146a	MIMAT0000449	NM_015257	TMEM194A	transmembrane protein 194A	0	0	1	1	0	0	0	1	0	1	0
hsa-miR-146a	MIMAT0000449	NM_015227	POFUT2	protein O-fucosyltransferase 2	0	0	1	1	0	0	0	1	0	1	0
hsa-miR-146a	MIMAT0000449	NM_015208	ANKRD12	ankyrin repeat domain 12	0	0	1	1	0	0	0	1	0	1	0
hsa-miR-146a	MIMAT0000449	NM_015199	ANKRD28	ankyrin repeat domain 28	0	0	1	0	0	0	1	1	0	1	0
hsa-miR-146a	MIMAT0000449	NM_015097	CLASP2	cytoplasmic linker associated protein 2	0	0	1	1	0	0	0	1	0	1	0
hsa-miR-146a	MIMAT0000449	NM_015094	HIC2	hypermethylated in cancer 2	0	0	0	0	0	0	1	1	0	1	1
hsa-miR-146a	MIMAT0000449	NM_015059	TLN2	talin 2	0	0	0	0	0	0	1	1	0	1	1
hsa-miR-146a	MIMAT0000449	NM_013277	RACGAP1	Rac GTPase activating protein 1	0	0	1	1	0	0	0	1	0	1	0
hsa-miR-146a	MIMAT0000449	NM_012428	NPTN	neuroplastin	0	0	0	0	0	0	1	1	0	1	1
hsa-miR-146a	MIMAT0000449	NM_005497	GJC1	gap junction protein, gamma 1, 45kDa	0	0	1	1	0	0	0	1	0	1	0
hsa-miR-146a	MIMAT0000449	NM_005440	RND2	Rho family GTPase 2	0	0	1	0	0	0	0	1	0	1	1
hsa-miR-146a	MIMAT0000449	NM_005433	YES1	v-yes-1 Yamaguchi sarcoma viral oncogene homolog 1	0	0	1	1	0	0	0	1	0	1	0
hsa-miR-146a	MIMAT0000449	NM_005418	ST5	suppression of tumorigenicity 5	0	0	0	0	0	0	1	1	0	1	1
hsa-miR-146a	MIMAT0000449	NM_005400	PRKCE	protein kinase C, epsilon	0	0	1	1	0	0	0	1	0	1	0
hsa-miR-146a	MIMAT0000449	NM_005204	MAP3K8	mitogen-activated protein kinase kinase kinase 8	0	0	0	0	0	0	1	1	0	1	1
hsa-miR-146a	MIMAT0000449	NM_005121	MED13	mediator complex subunit 13	0	0	1	0	0	0	0	1	0	1	1
hsa-miR-146a	MIMAT0000449	NM_004999	MYO6	myosin VI	0	0	1	0	0	0	0	1	0	1	1
hsa-miR-146a	MIMAT0000449	NM_004852	ONECUT2	one cut homeobox 2	0	0	1	1	0	0	0	1	0	1	0
hsa-miR-146a	MIMAT0000449	NM_004746	DLGAP1	discs, large (Drosophila) homolog-associated protein 1	0	0	1	0	0	0	1	1	0	1	0
hsa-miR-146a	MIMAT0000449	NM_004745	DLGAP2	discs, large (Drosophila) homolog-associated protein 2	0	0	1	1	0	0	0	1	0	1	0
hsa-miR-146a	MIMAT0000449	NM_004562	PARK2	Parkinson disease (autosomal recessive, juvenile) 2, parkin	0	0	1	1	0	0	0	1	0	1	0
hsa-miR-146a	MIMAT0000449	NM_004543	NEB	nebulin	0	0	1	1	0	0	0	1	0	1	0
hsa-miR-146a	MIMAT0000449	NM_004535	MYT1	myelin transcription factor 1	0	0	0	0	0	0	1	1	0	1	1
hsa-miR-146a	MIMAT0000449	NM_004525	LRP2	low density lipoprotein-related protein 2	0	0	1	1	0	0	0	1	0	1	0
hsa-miR-146a	MIMAT0000449	NM_005788	PRMT3	protein arginine methyltransferase 3	0	0	1	1	0	0	0	1	0	1	0
hsa-miR-146a	MIMAT0000449	NM_005816	CD96	CD96 molecule	0	0	1	1	0	0	0	1	0	1	0
hsa-miR-146a	MIMAT0000449	NM_012175	FBXO3	F-box protein 3	0	0	1	1	0	0	0	1	0	1	0
hsa-miR-146a	MIMAT0000449	NM_012164	FBXW2	F-box and WD repeat domain containing 2	0	0	1	1	0	0	0	1	0	1	0
hsa-miR-146a	MIMAT0000449	NM_006947	SRP72	signal recognition particle 72kDa	0	0	1	1	0	0	0	1	0	1	0
hsa-miR-146a	MIMAT0000449	NM_006924	SFRS1	splicing factor, arginine/serine-rich 1 (splicing factor 2, alternate splicing factor)	0	0	1	0	0	0	1	1	0	1	0
hsa-miR-146a	MIMAT0000449	NM_006908	RAC1	ras-related C3 botulinum toxin substrate 1 (rho family, small GTP binding protein Rac1)	0	0	1	1	0	0	0	1	0	1	0
hsa-miR-146a	MIMAT0000449	NM_006599	NFAT5	nuclear factor of activated T-cells 5, tonicity-responsive	0	0	1	0	0	0	1	1	0	1	0
hsa-miR-146a	MIMAT0000449	NM_006524	ZNF138	zinc finger protein 138	0	0	1	1	0	0	0	1	0	1	0
hsa-miR-146a	MIMAT0000449	NM_006504	PTPRE	protein tyrosine phosphatase, receptor type, E	0	0	1	1	0	0	0	1	0	1	0
hsa-miR-146a	MIMAT0000449	NM_006454	MXD4	MAX dimerization protein 4	0	0	0	0	0	0	1	1	0	1	1
hsa-miR-146a	MIMAT0000449	NM_006094	DLC1	deleted in liver cancer 1	0	0	1	1	0	0	0	1	0	1	0
hsa-miR-146a	MIMAT0000449	NM_006065	SIRPB1	signal-regulatory protein beta 1	0	0	1	1	0	0	0	1	0	1	0
hsa-miR-146a	MIMAT0000449	NM_006055	LANCL1	LanC lantibiotic synthetase component C-like 1 (bacterial)	0	0	1	1	0	0	0	1	0	1	0
hsa-miR-146a	MIMAT0000449	NM_005941	MMP16	matrix metallopeptidase 16 (membrane-inserted)	0	0	1	0	0	0	0	1	0	1	1
hsa-miR-146a	MIMAT0000449	NM_005911	MAT2A	methionine adenosyltransferase II, alpha	0	0	0	0	0	0	1	1	0	1	1
hsa-miR-146a	MIMAT0000449	NM_005885	MARCH6	membrane-associated ring finger (C3HC4) 6	0	0	1	1	0	0	0	1	0	1	0
hsa-miR-146a	MIMAT0000449	NM_004412	TRDMT1	tRNA aspartic acid methyltransferase 1	0	0	1	1	0	0	0	1	0	1	0
