# Supplementary material for: Astrocyte-Derived Small Extracellular Vesicles Regulate Dendritic Complexity through miR-26a-5p Activity
Source: Preprints.org preprint supplement (doi:10.20944/preprints202002.0250.v1), 2020-02-17
Supplement: Supplementary file 5 [file mir-181.xls]

# "1" : interaction predicted; "0" : interaction not predicted.
miRNA ID	miRNA Acc	Refseq	Symbol	Description	diana	microinspector	miranda	mirtarget2	mitarget	nbmirtar	pictar	pita	rna22	rnahybrid	targetscan
hsa-miR-181a	MIMAT0000256	NM_005523	HOXA11	homeobox A11	0	0	1	1	0	1	1	1	0	1	1
hsa-miR-181a	MIMAT0000256	NM_000125	ESR1	estrogen receptor 1	0	0	1	1	0	0	1	1	0	1	1
hsa-miR-181a	MIMAT0000256	NM_000176	NR3C1	nuclear receptor subfamily 3, group C, member 1 (glucocorticoid receptor)	0	0	1	1	0	0	1	1	0	1	1
hsa-miR-181a	MIMAT0000256	NM_000332	ATXN1	ataxin 1	0	0	1	1	0	0	1	1	0	1	1
hsa-miR-181a	MIMAT0000256	NM_000362	TIMP3	TIMP metallopeptidase inhibitor 3 (Sorsby fundus dystrophy, pseudoinflammatory)	0	0	1	1	0	0	1	1	0	1	1
hsa-miR-181a	MIMAT0000256	NM_000575	IL1A	interleukin 1, alpha	0	0	1	1	0	0	1	1	0	1	1
hsa-miR-181a	MIMAT0000256	NM_000724	CACNB2	calcium channel, voltage-dependent, beta 2 subunit	0	0	1	1	0	0	1	1	0	1	1
hsa-miR-181a	MIMAT0000256	NM_000801	FKBP1A	FK506 binding protein 1A, 12kDa	0	0	1	1	0	0	1	1	0	1	1
hsa-miR-181a	MIMAT0000256	NM_000806	GABRA1	gamma-aminobutyric acid (GABA) A receptor, alpha 1	0	0	1	1	0	0	1	1	0	1	1
hsa-miR-181a	MIMAT0000256	NM_000842	GRM5	glutamate receptor, metabotropic 5	0	0	1	1	0	0	1	1	0	1	1
hsa-miR-181a	MIMAT0000256	NM_000919	PAM	peptidylglycine alpha-amidating monooxygenase	0	0	1	1	0	0	1	1	0	1	1
hsa-miR-181a	MIMAT0000256	NM_000945	PPP3R1	protein phosphatase 3 (formerly 2B), regulatory subunit B, alpha isoform	0	0	1	1	0	0	1	1	0	1	1
hsa-miR-181a	MIMAT0000256	NM_001001331	ATP2B2	ATPase, Ca++ transporting, plasma membrane 2	0	0	1	1	0	0	1	1	0	1	1
hsa-miR-181a	MIMAT0000256	NM_001001436	C16orf87	chromosome 16 open reading frame 87	0	0	1	1	0	0	1	1	0	1	1
hsa-miR-181a	MIMAT0000256	NM_001002243	AFTPH	aftiphilin	0	0	1	1	0	0	1	1	0	1	1
hsa-miR-181a	MIMAT0000256	NM_001002257	LYCAT	lysocardiolipin acyltransferase	0	0	1	1	0	0	1	1	0	1	1
hsa-miR-181a	MIMAT0000256	NM_001004317	LIN28B	lin-28 homolog B (C. elegans)	0	0	1	1	0	0	1	1	0	1	1
hsa-miR-181a	MIMAT0000256	NM_001124	ADM	adrenomedullin	0	0	1	1	0	0	1	1	0	1	1
hsa-miR-181a	MIMAT0000256	NM_001304	CPD	carboxypeptidase D	0	0	1	1	0	0	1	1	0	1	1
hsa-miR-181a	MIMAT0000256	NM_001426	EN1	engrailed homeobox 1	0	0	1	1	0	0	1	1	0	1	1
hsa-miR-181a	MIMAT0000256	NM_001489	NR6A1	nuclear receptor subfamily 6, group A, member 1	0	0	1	1	0	0	1	1	0	1	1
hsa-miR-181a	MIMAT0000256	NM_001497	B4GALT1	UDP-Gal:betaGlcNAc beta 1,4- galactosyltransferase, polypeptide 1	0	0	1	1	0	0	1	1	0	1	1
hsa-miR-181a	MIMAT0000256	NM_001616	ACVR2A	activin A receptor, type IIA	0	0	1	1	0	0	1	1	0	1	1
hsa-miR-181a	MIMAT0000256	NM_001677	ATP1B1	ATPase, Na+/K+ transporting, beta 1 polypeptide	0	0	1	1	0	0	1	1	0	1	1
hsa-miR-181a	MIMAT0000256	NM_001682	ATP2B1	ATPase, Ca++ transporting, plasma membrane 1	0	0	1	1	0	0	1	1	0	1	1
hsa-miR-181a	MIMAT0000256	NM_001987	ETV6	ets variant gene 6 (TEL oncogene)	0	0	1	1	0	0	1	1	0	1	1
hsa-miR-181a	MIMAT0000256	NM_001995	ACSL1	acyl-CoA synthetase long-chain family member 1	0	0	1	1	0	0	1	1	0	1	1
hsa-miR-181a	MIMAT0000256	NM_002126	HLF	hepatic leukemia factor	0	0	1	1	0	0	1	1	0	1	1
hsa-miR-181a	MIMAT0000256	NM_002204	ITGA3	integrin, alpha 3 (antigen CD49C, alpha 3 subunit of VLA-3 receptor)	0	0	1	1	0	0	1	1	0	1	1
hsa-miR-181a	MIMAT0000256	NM_002214	ITGB8	integrin, beta 8	0	0	1	1	0	0	1	1	0	1	1
hsa-miR-181a	MIMAT0000256	NM_002264	KPNA1	karyopherin alpha 1 (importin alpha 5)	0	0	1	1	0	0	1	1	0	1	1
hsa-miR-181a	MIMAT0000256	NM_002265	KPNB1	karyopherin (importin) beta 1	0	0	1	1	0	0	1	1	0	1	1
hsa-miR-181a	MIMAT0000256	NM_002390	ADAM11	ADAM metallopeptidase domain 11	0	0	1	1	0	0	1	1	0	1	1
hsa-miR-181a	MIMAT0000256	NM_002401	MAP3K3	mitogen-activated protein kinase kinase kinase 3	0	0	1	1	0	0	1	1	0	1	1
hsa-miR-181a	MIMAT0000256	NM_002655	PLAG1	pleiomorphic adenoma gene 1	0	0	1	1	0	0	1	1	0	1	1
hsa-miR-181a	MIMAT0000256	NM_002755	MAP2K1	mitogen-activated protein kinase kinase 1	0	0	1	1	0	0	1	1	0	1	1
hsa-miR-181a	MIMAT0000256	NM_002833	PTPN9	protein tyrosine phosphatase, non-receptor type 9	0	0	1	1	0	0	1	1	0	1	1
hsa-miR-181a	MIMAT0000256	NM_002893	RBBP7	retinoblastoma binding protein 7	0	0	1	1	0	0	1	1	0	1	1
hsa-miR-181a	MIMAT0000256	NM_002956	CLIP1	CAP-GLY domain containing linker protein 1	0	0	1	1	0	0	1	1	0	1	1
hsa-miR-181a	MIMAT0000256	NM_003155	STC1	stanniocalcin 1	0	0	1	1	0	0	1	1	0	1	1
hsa-miR-181a	MIMAT0000256	NM_003337	UBE2B	ubiquitin-conjugating enzyme E2B (RAD6 homolog)	0	0	1	1	0	0	1	1	0	1	1
hsa-miR-181a	MIMAT0000256	NM_003413	ZIC3	Zic family member 3 heterotaxy 1 (odd-paired homolog, Drosophila)	0	0	1	1	0	0	1	1	0	1	1
hsa-miR-181a	MIMAT0000256	NM_003590	CUL3	cullin 3	0	0	1	1	0	0	1	1	0	1	1
hsa-miR-181a	MIMAT0000256	NM_003607	CDC42BPA	CDC42 binding protein kinase alpha (DMPK-like)	0	0	1	1	0	0	1	1	0	1	1
hsa-miR-181a	MIMAT0000256	NM_003629	PIK3R3	phosphoinositide-3-kinase, regulatory subunit 3 (gamma)	0	0	1	1	0	0	1	1	0	1	1
hsa-miR-181a	MIMAT0000256	NM_003749	IRS2	insulin receptor substrate 2	0	0	1	1	0	0	1	1	0	1	1
hsa-miR-181a	MIMAT0000256	NM_003884	PCAF	p300/CBP-associated factor	0	0	1	1	0	0	1	1	0	1	1
hsa-miR-181a	MIMAT0000256	NM_004274	AKAP6	A kinase (PRKA) anchor protein 6	0	0	1	1	0	0	1	1	0	1	1
hsa-miR-181a	MIMAT0000256	NM_004663	RAB11A	RAB11A, member RAS oncogene family	0	0	1	1	0	0	1	1	0	1	1
hsa-miR-181a	MIMAT0000256	NM_004865	TBPL1	TBP-like 1	0	0	1	1	0	0	1	1	0	1	1
hsa-miR-181a	MIMAT0000256	NM_004922	SEC24C	SEC24 related gene family, member C (S. cerevisiae)	0	0	1	1	0	0	1	1	0	1	1
hsa-miR-181a	MIMAT0000256	NM_004926	ZFP36L1	zinc finger protein 36, C3H type-like 1	0	0	1	1	0	0	1	1	0	1	1
hsa-miR-181a	MIMAT0000256	NM_005065	SEL1L	sel-1 suppressor of lin-12-like (C. elegans)	0	0	1	1	0	0	1	1	0	1	1
hsa-miR-181a	MIMAT0000256	NM_005400	PRKCE	protein kinase C, epsilon	0	0	1	1	0	0	1	1	0	1	1
hsa-miR-181a	MIMAT0000256	NM_005512	LRRC32	leucine rich repeat containing 32	0	0	1	1	0	0	1	1	0	1	1
hsa-miR-181a	MIMAT0000256	NM_005668	ST8SIA4	ST8 alpha-N-acetyl-neuraminide alpha-2,8-sialyltransferase 4	0	0	1	1	0	0	1	1	0	1	1
hsa-miR-181a	MIMAT0000256	NM_006141	DYNC1LI2	dynein, cytoplasmic 1, light intermediate chain 2	0	0	1	1	0	0	1	1	0	1	1
hsa-miR-181a	MIMAT0000256	NM_006195	PBX3	pre-B-cell leukemia homeobox 3	0	0	1	1	0	0	1	1	0	1	1
hsa-miR-181a	MIMAT0000256	NM_006206	PDGFRA	platelet-derived growth factor receptor, alpha polypeptide	0	0	1	1	0	0	1	1	0	1	1
hsa-miR-181a	MIMAT0000256	NM_006254	PRKCD	protein kinase C, delta	0	0	1	1	0	0	1	1	0	1	1
hsa-miR-181a	MIMAT0000256	NM_006265	RAD21	RAD21 homolog (S. pombe)	0	0	1	1	0	0	1	1	0	1	1
hsa-miR-181a	MIMAT0000256	NM_006325	RAN	RAN, member RAS oncogene family	0	0	1	1	0	0	1	1	0	1	1
hsa-miR-181a	MIMAT0000256	NM_006599	NFAT5	nuclear factor of activated T-cells 5, tonicity-responsive	0	0	1	1	0	0	1	1	0	1	1
hsa-miR-181a	MIMAT0000256	NM_006940	SOX5	SRY (sex determining region Y)-box 5	0	0	1	1	0	0	1	1	0	1	1
hsa-miR-181a	MIMAT0000256	NM_006981	NR4A3	nuclear receptor subfamily 4, group A, member 3	0	0	1	1	0	0	1	1	0	1	1
hsa-miR-181a	MIMAT0000256	NM_007129	ZIC2	Zic family member 2 (odd-paired homolog, Drosophila)	0	0	1	1	0	0	1	1	0	1	1
hsa-miR-181a	MIMAT0000256	NM_007246	KLHL2	kelch-like 2, Mayven (Drosophila)	0	0	1	1	0	0	1	1	0	1	1
hsa-miR-181a	MIMAT0000256	NM_007375	TARDBP	TAR DNA binding protein	0	0	1	1	0	0	1	1	0	1	1
hsa-miR-181a	MIMAT0000256	NM_012238	SIRT1	sirtuin (silent mating type information regulation 2 homolog) 1 (S. cerevisiae)	0	0	1	1	0	0	1	1	0	1	1
hsa-miR-181a	MIMAT0000256	NM_012297	G3BP2	GTPase activating protein (SH3 domain) binding protein 2	0	0	1	1	0	0	1	1	0	1	1
hsa-miR-181a	MIMAT0000256	NM_012421	RLF	rearranged L-myc fusion	0	0	1	1	0	0	1	1	0	1	1
hsa-miR-181a	MIMAT0000256	NM_012479	YWHAG	tyrosine 3-monooxygenase/tryptophan 5-monooxygenase activation protein, gamma polypeptide	0	0	1	1	0	0	1	1	0	1	1
hsa-miR-181a	MIMAT0000256	NM_013372	GREM1	gremlin 1, cysteine knot superfamily, homolog (Xenopus laevis)	0	0	1	1	0	0	1	1	0	1	1
hsa-miR-181a	MIMAT0000256	NM_014021	SSX2IP	synovial sarcoma, X breakpoint 2 interacting protein	0	0	1	1	0	0	1	1	0	1	1
hsa-miR-181a	MIMAT0000256	NM_014079	KLF15	Kruppel-like factor 15	0	0	1	1	0	0	1	1	0	1	1
hsa-miR-181a	MIMAT0000256	NM_014293	NPTXR	neuronal pentraxin receptor	0	0	1	1	0	0	1	1	0	1	1
hsa-miR-181a	MIMAT0000256	NM_014319	LEMD3	LEM domain containing 3	0	0	1	1	0	0	1	1	0	1	1
hsa-miR-181a	MIMAT0000256	NM_014504	RABGEF1	RAB guanine nucleotide exchange factor (GEF) 1	0	0	1	1	0	0	1	1	0	1	1
hsa-miR-181a	MIMAT0000256	NM_014517	UBP1	upstream binding protein 1 (LBP-1a)	0	0	1	1	0	0	1	1	0	1	1
hsa-miR-181a	MIMAT0000256	NM_014554	SENP1	SUMO1/sentrin specific peptidase 1	0	0	1	1	0	0	1	1	0	1	1
hsa-miR-181a	MIMAT0000256	NM_014577	BRD1	bromodomain containing 1	0	0	1	1	0	0	1	1	0	1	1
hsa-miR-181a	MIMAT0000256	NM_014729	TOX	thymocyte selection-associated high mobility group box	0	0	1	1	0	0	1	1	0	1	1
hsa-miR-181a	MIMAT0000256	NM_014738	KIAA0195	KIAA0195	0	0	1	1	0	0	1	1	0	1	1
hsa-miR-181a	MIMAT0000256	NM_014802	KIAA0528	KIAA0528	0	0	1	1	0	0	1	1	0	1	1
hsa-miR-181a	MIMAT0000256	NM_014905	GLS	glutaminase	0	0	1	1	0	0	1	1	0	1	1
hsa-miR-181a	MIMAT0000256	NM_014962	BTBD3	BTB (POZ) domain containing 3	0	0	1	1	0	0	1	1	0	1	1
hsa-miR-181a	MIMAT0000256	NM_015091	KIAA0423	KIAA0423	0	0	1	1	0	0	1	1	0	1	1
hsa-miR-181a	MIMAT0000256	NM_015094	HIC2	hypermethylated in cancer 2	0	0	1	1	0	0	1	1	0	1	1
hsa-miR-181a	MIMAT0000256	NM_015141	GPD1L	glycerol-3-phosphate dehydrogenase 1-like	0	0	1	1	0	0	1	1	0	1	1
hsa-miR-181a	MIMAT0000256	NM_015153	PHF3	PHD finger protein 3	0	0	1	1	0	0	1	1	0	1	1
hsa-miR-181a	MIMAT0000256	NM_015158	KANK1	KN motif and ankyrin repeat domains 1	0	0	1	1	0	0	1	1	0	1	1
hsa-miR-181a	MIMAT0000256	NM_015216	HISPPD1	histidine acid phosphatase domain containing 1	0	0	1	1	0	0	1	1	0	1	1
hsa-miR-181a	MIMAT0000256	NM_015268	DNAJC13	DnaJ (Hsp40) homolog, subfamily C, member 13	0	0	1	1	0	0	1	1	0	1	1
hsa-miR-181a	MIMAT0000256	NM_015271	TRIM2	tripartite motif-containing 2	0	0	1	1	0	0	1	1	0	1	1
hsa-miR-181a	MIMAT0000256	NM_015282	CLASP1	cytoplasmic linker associated protein 1	0	0	1	1	0	0	1	1	0	1	1
hsa-miR-181a	MIMAT0000256	NM_015429	ABI3BP	ABI gene family, member 3 (NESH) binding protein	0	0	1	1	0	0	1	1	0	1	1
hsa-miR-181a	MIMAT0000256	NM_015550	OSBPL3	oxysterol binding protein-like 3	0	0	1	1	0	0	1	1	0	1	1
hsa-miR-181a	MIMAT0000256	NM_015630	EPC2	enhancer of polycomb homolog 2 (Drosophila)	0	0	1	1	0	0	1	1	0	1	1
hsa-miR-181a	MIMAT0000256	NM_015635	GAPVD1	GTPase activating protein and VPS9 domains 1	0	0	1	1	0	0	1	1	0	1	1
hsa-miR-181a	MIMAT0000256	NM_016018	PHF20L1	PHD finger protein 20-like 1	0	0	1	1	0	0	1	1	0	1	1
hsa-miR-181a	MIMAT0000256	NM_017553	INOC1	INO80 complex homolog 1 (S. cerevisiae)	0	0	1	1	0	0	1	1	0	1	1
hsa-miR-181a	MIMAT0000256	NM_017694	FLJ20160	FLJ20160 protein	0	0	1	1	0	0	1	1	0	1	1
hsa-miR-181a	MIMAT0000256	NM_017761	PNRC2	proline-rich nuclear receptor coactivator 2	0	0	1	1	0	0	1	1	0	1	1
hsa-miR-181a	MIMAT0000256	NM_017893	SEMA4G	sema domain, immunoglobulin domain (Ig), transmembrane domain (TM) and short cytoplasmic domain, (semaphorin) 4G	0	0	1	1	0	0	1	1	0	1	1
hsa-miR-181a	MIMAT0000256	NM_018043	TMEM16A	transmembrane protein 16A	0	0	1	1	0	0	1	1	0	1	1
hsa-miR-181a	MIMAT0000256	NM_018323	PI4K2B	phosphatidylinositol 4-kinase type 2 beta	0	0	1	1	0	0	1	1	0	1	1
hsa-miR-181a	MIMAT0000256	NM_018704	CTTNBP2NL	CTTNBP2 N-terminal like	0	0	1	1	0	0	1	1	0	1	1
hsa-miR-181a	MIMAT0000256	NM_018899	PCDHAC2	protocadherin alpha subfamily C, 2	0	0	1	1	0	0	1	1	0	1	1
hsa-miR-181a	MIMAT0000256	NM_018900	PCDHA1	protocadherin alpha 1	0	0	1	1	0	0	1	1	0	1	1
hsa-miR-181a	MIMAT0000256	NM_018901	PCDHA10	protocadherin alpha 10	0	0	1	1	0	0	1	1	0	1	1
hsa-miR-181a	MIMAT0000256	NM_018903	PCDHA12	protocadherin alpha 12	0	0	1	1	0	0	1	1	0	1	1
hsa-miR-181a	MIMAT0000256	NM_018904	PCDHA13	protocadherin alpha 13	0	0	1	1	0	0	1	1	0	1	1
hsa-miR-181a	MIMAT0000256	NM_018905	PCDHA2	protocadherin alpha 2	0	0	1	1	0	0	1	1	0	1	1
hsa-miR-181a	MIMAT0000256	NM_018906	PCDHA3	protocadherin alpha 3	0	0	1	1	0	0	1	1	0	1	1
hsa-miR-181a	MIMAT0000256	NM_018907	PCDHA4	protocadherin alpha 4	0	0	1	1	0	0	1	1	0	1	1
hsa-miR-181a	MIMAT0000256	NM_018908	PCDHA5	protocadherin alpha 5	0	0	1	1	0	0	1	1	0	1	1
hsa-miR-181a	MIMAT0000256	NM_018910	PCDHA7	protocadherin alpha 7	0	0	1	1	0	0	1	1	0	1	1
hsa-miR-181a	MIMAT0000256	NM_018911	PCDHA8	protocadherin alpha 8	0	0	1	1	0	0	1	1	0	1	1
hsa-miR-181a	MIMAT0000256	NM_018976	SLC38A2	solute carrier family 38, member 2	0	0	1	1	0	0	1	1	0	1	1
hsa-miR-181a	MIMAT0000256	NM_019006	ZFAND6	zinc finger, AN1-type domain 6	0	0	1	1	0	0	1	1	0	1	1
hsa-miR-181a	MIMAT0000256	NM_019084	CCNJ	cyclin J	0	0	1	1	0	0	1	1	0	1	1
hsa-miR-181a	MIMAT0000256	NM_019892	INPP5E	inositol polyphosphate-5-phosphatase, 72 kDa	0	0	1	1	0	0	1	1	0	1	1
hsa-miR-181a	MIMAT0000256	NM_020873	LRRN1	leucine rich repeat neuronal 1	0	0	1	1	0	0	1	1	0	1	1
hsa-miR-181a	MIMAT0000256	NM_020899	ZBTB4	zinc finger and BTB domain containing 4	0	0	1	1	0	0	1	1	0	1	1
hsa-miR-181a	MIMAT0000256	NM_022062	PKNOX2	PBX/knotted 1 homeobox 2	0	0	1	1	0	0	1	1	0	1	1
hsa-miR-181a	MIMAT0000256	NM_022763	FNDC3B	fibronectin type III domain containing 3B	0	0	1	1	0	0	1	1	0	1	1
hsa-miR-181a	MIMAT0000256	NM_022894	PAPOLG	poly(A) polymerase gamma	0	0	1	1	0	0	1	1	0	1	1
hsa-miR-181a	MIMAT0000256	NM_024052	C17orf39	chromosome 17 open reading frame 39	0	0	1	1	0	0	1	1	0	1	1
hsa-miR-181a	MIMAT0000256	NM_024295	DERL1	Der1-like domain family, member 1	0	0	1	1	0	0	1	1	0	1	1
hsa-miR-181a	MIMAT0000256	NM_024674	LIN28	lin-28 homolog (C. elegans)	0	0	1	1	0	0	1	1	0	1	1
hsa-miR-181a	MIMAT0000256	NM_025134	CHD9	chromodomain helicase DNA binding protein 9	0	0	1	1	0	0	1	1	0	1	1
hsa-miR-181a	MIMAT0000256	NM_030627	CPEB4	cytoplasmic polyadenylation element binding protein 4	0	0	1	1	0	0	1	1	0	1	1
hsa-miR-181a	MIMAT0000256	NM_030939	C6orf62	chromosome 6 open reading frame 62	0	0	1	1	0	0	1	1	0	1	1
hsa-miR-181a	MIMAT0000256	NM_030964	SPRY4	sprouty homolog 4 (Drosophila)	0	0	1	1	0	0	1	1	0	1	1
hsa-miR-181a	MIMAT0000256	NM_032105	PPP1R12B	protein phosphatase 1, regulatory (inhibitor) subunit 12B	0	0	1	1	0	0	1	1	0	1	1
hsa-miR-181a	MIMAT0000256	NM_032682	FOXP1	forkhead box P1	0	0	1	1	0	0	1	1	0	1	1
hsa-miR-181a	MIMAT0000256	NM_033071	SYNE1	spectrin repeat containing, nuclear envelope 1	0	0	1	1	0	0	1	1	0	1	1
hsa-miR-181a	MIMAT0000256	NM_052910	SLITRK1	SLIT and NTRK-like family, member 1	0	0	1	1	0	0	1	1	0	1	1
hsa-miR-181a	MIMAT0000256	NM_138799	MBOAT2	membrane bound O-acyltransferase domain containing 2	0	0	1	1	0	0	1	1	0	1	1
hsa-miR-181a	MIMAT0000256	NM_144642	SYNPR	synaptoporin	0	0	1	1	0	0	1	1	0	1	1
hsa-miR-181a	MIMAT0000256	NM_144726	RNF145	ring finger protein 145	0	0	1	1	0	0	1	1	0	1	1
hsa-miR-181a	MIMAT0000256	NM_152737	RNF182	ring finger protein 182	0	0	1	1	0	0	1	1	0	1	1
hsa-miR-181a	MIMAT0000256	NM_152793	C7orf41	chromosome 7 open reading frame 41	0	0	1	1	0	0	1	1	0	1	1
hsa-miR-181a	MIMAT0000256	NM_152991	EED	embryonic ectoderm development	0	0	1	1	0	0	1	1	0	1	1
hsa-miR-181a	MIMAT0000256	NM_153267	MAMDC2	MAM domain containing 2	0	0	1	1	0	0	1	1	0	1	1
hsa-miR-181a	MIMAT0000256	NM_175607	CNTN4	contactin 4	0	0	1	1	0	0	1	1	0	1	1
hsa-miR-181a	MIMAT0000256	NM_175709	CBX7	chromobox homolog 7	0	0	1	1	0	0	1	1	0	1	1
hsa-miR-181a	MIMAT0000256	NM_175873	ANKRD43	ankyrin repeat domain 43	0	0	1	1	0	0	1	1	0	1	1
hsa-miR-181a	MIMAT0000256	NM_176814	ZNF800	zinc finger protein 800	0	0	1	1	0	0	1	1	0	1	1
hsa-miR-181a	MIMAT0000256	NM_178496	C3orf59	chromosome 3 open reading frame 59	0	0	1	1	0	0	1	1	0	1	1
hsa-miR-181a	MIMAT0000256	NM_178565	RSPO2	R-spondin 2 homolog (Xenopus laevis)	0	0	1	1	0	0	1	1	0	1	1
hsa-miR-181a	MIMAT0000256	NM_198480	ZNF615	zinc finger protein 615	0	0	1	1	0	0	1	1	0	1	1
hsa-miR-181a	MIMAT0000256	NM_198581	ZC3H6	zinc finger CCCH-type containing 6	0	0	1	1	0	0	1	1	0	1	1
hsa-miR-181a	MIMAT0000256	NM_198935	SS18L1	synovial sarcoma translocation gene on chromosome 18-like 1	0	0	1	1	0	0	1	1	0	1	1
hsa-miR-181a	MIMAT0000256	NM_199355	ADAMTS18	ADAM metallopeptidase with thrombospondin type 1 motif, 18	0	0	1	1	0	0	1	1	0	1	1
hsa-miR-181a	MIMAT0000256	NM_203301	FBXO33	F-box protein 33	0	0	1	1	0	0	1	1	0	1	1
hsa-miR-181a	MIMAT0000256	NM_203394	E2F7	E2F transcription factor 7	0	0	1	1	0	0	1	1	0	1	1
hsa-miR-181a	MIMAT0000256	NM_000358	TGFBI	transforming growth factor, beta-induced, 68kDa	0	0	0	1	0	0	1	1	0	1	1
hsa-miR-181a	MIMAT0000256	NM_000408	GPD2	glycerol-3-phosphate dehydrogenase 2 (mitochondrial)	0	0	1	1	0	0	0	1	0	1	1
hsa-miR-181a	MIMAT0000256	NM_000616	CD4	CD4 molecule	0	0	0	1	0	0	1	1	0	1	1
hsa-miR-181a	MIMAT0000256	NM_000826	GRIA2	glutamate receptor, ionotropic, AMPA 2	0	0	1	0	0	0	1	1	0	1	1
hsa-miR-181a	MIMAT0000256	NM_001001323	ATP2B1	ATPase, Ca++ transporting, plasma membrane 1	0	0	1	1	0	0	1	1	0	1	0
hsa-miR-181a	MIMAT0000256	NM_001001395	LMO3	LIM domain only 3 (rhombotin-like 2)	0	0	0	1	0	0	1	1	0	1	1
hsa-miR-181a	MIMAT0000256	NM_001001549	GRB10	growth factor receptor-bound protein 10	0	0	1	1	0	0	0	1	0	1	1
hsa-miR-181a	MIMAT0000256	NM_001001787	ATP1B1	ATPase, Na+/K+ transporting, beta 1 polypeptide	0	0	1	1	0	0	1	1	0	1	0
hsa-miR-181a	MIMAT0000256	NM_001001928	PPARA	peroxisome proliferator-activated receptor alpha	0	0	1	1	0	0	0	1	0	1	1
hsa-miR-181a	MIMAT0000256	NM_001003712	OSBPL8	oxysterol binding protein-like 8	0	0	0	1	0	0	1	1	0	1	1
hsa-miR-181a	MIMAT0000256	NM_001004360	DPP10	dipeptidyl-peptidase 10	0	0	1	0	0	0	1	1	0	1	1
hsa-miR-181a	MIMAT0000256	NM_001005505	CACNA2D2	calcium channel, voltage-dependent, alpha 2/delta subunit 2	0	0	1	0	0	0	1	1	0	1	1
hsa-miR-181a	MIMAT0000256	NM_001006641	SLC25A25	solute carrier family 25 (mitochondrial carrier; phosphate carrier), member 25	0	0	1	1	0	0	0	1	0	1	1
hsa-miR-181a	MIMAT0000256	NM_001007075	KLHL5	kelch-like 5 (Drosophila)	0	0	1	1	0	0	0	1	0	1	1
hsa-miR-181a	MIMAT0000256	NM_001008392	CTDSPL	CTD (carboxy-terminal domain, RNA polymerase II, polypeptide A) small phosphatase-like	0	0	1	1	0	0	0	1	0	1	1
hsa-miR-181a	MIMAT0000256	NM_001008537	KIAA2022	KIAA2022	0	0	1	1	0	0	0	1	0	1	1
hsa-miR-181a	MIMAT0000256	NM_001008660	PICALM	phosphatidylinositol binding clathrin assembly protein	0	0	1	1	0	0	0	1	0	1	1
hsa-miR-181a	MIMAT0000256	NM_001008801	ZNF468	zinc finger protein 468	0	0	1	1	0	0	0	1	0	1	1
hsa-miR-181a	MIMAT0000256	NM_001010942	RAP1B	RAP1B, member of RAS oncogene family	0	0	1	1	0	0	0	1	0	1	1
hsa-miR-181a	MIMAT0000256	NM_001010986	ATP11C	ATPase, class VI, type 11C	0	0	1	1	0	0	0	1	0	1	1
hsa-miR-181a	MIMAT0000256	NM_001012423	GOLGA8E	golgi autoantigen, golgin subfamily a, 8E	0	0	1	1	0	0	0	1	0	1	1
hsa-miR-181a	MIMAT0000256	NM_001012750	ABI1	abl-interactor 1	0	0	1	1	0	0	0	1	0	1	1
hsa-miR-181a	MIMAT0000256	NM_001024843	TNRC6B	trinucleotide repeat containing 6B	0	0	1	1	0	0	0	1	0	1	1
hsa-miR-181a	MIMAT0000256	NM_001030007	AP1G1	adaptor-related protein complex 1, gamma 1 subunit	0	0	1	1	0	0	0	1	0	1	1
hsa-miR-181a	MIMAT0000256	NM_001031684	SFRS7	splicing factor, arginine/serine-rich 7, 35kDa	0	0	1	1	0	0	0	1	0	1	1
hsa-miR-181a	MIMAT0000256	NM_001031732	YTHDC1	YTH domain containing 1	0	0	1	1	0	0	0	1	0	1	1
hsa-miR-181a	MIMAT0000256	NM_001033049	ADARB1	adenosine deaminase, RNA-specific, B1 (RED1 homolog rat)	0	0	1	1	0	0	0	1	0	1	1
hsa-miR-181a	MIMAT0000256	NM_001037165	FOXK1	forkhead box K1	0	0	1	1	0	0	0	1	0	1	1
hsa-miR-181a	MIMAT0000256	NM_001037293	PALM2	paralemmin 2	0	0	1	1	0	0	0	1	0	1	1
hsa-miR-181a	MIMAT0000256	NM_001039111	TRIM71	tripartite motif-containing 71	0	0	1	1	0	0	0	1	0	1	1
hsa-miR-181a	MIMAT0000256	NM_001039618	CREBZF	CREB/ATF bZIP transcription factor	0	0	1	1	0	0	0	1	0	1	1
hsa-miR-181a	MIMAT0000256	NM_001040214	NKAIN2	Na+/K+ transporting ATPase interacting 2	0	0	1	1	0	0	0	1	0	1	1
hsa-miR-181a	MIMAT0000256	NM_001040284	PAPD5	PAP associated domain containing 5	0	0	1	1	0	0	0	1	0	1	1
hsa-miR-181a	MIMAT0000256	NM_001040446	MTMR12	myotubularin related protein 12	0	0	1	1	0	0	0	1	0	1	1
hsa-miR-181a	MIMAT0000256	NM_001042537	SLC9A6	solute carrier family 9 (sodium/hydrogen exchanger), member 6	0	0	1	1	0	0	0	1	0	1	1
hsa-miR-181a	MIMAT0000256	NM_001043318	C14orf43	chromosome 14 open reading frame 43	0	0	1	1	0	0	0	1	0	1	1
hsa-miR-181a	MIMAT0000256	NM_001076786	QSER1	glutamine and serine rich 1	0	0	1	1	0	0	0	1	0	1	1
hsa-miR-181a	MIMAT0000256	NM_001080450	KIAA1553	KIAA1553	0	0	1	1	0	0	0	1	0	1	1
hsa-miR-181a	MIMAT0000256	NM_001106	ACVR2B	activin A receptor, type IIB	0	0	1	1	0	0	0	1	0	1	1
hsa-miR-181a	MIMAT0000256	NM_001116	ADCY9	adenylate cyclase 9	0	0	1	0	0	0	1	1	0	1	1
hsa-miR-181a	MIMAT0000256	NM_001128	AP1G1	adaptor-related protein complex 1, gamma 1 subunit	0	0	1	1	0	0	1	1	0	1	0
hsa-miR-181a	MIMAT0000256	NM_001204	BMPR2	bone morphogenetic protein receptor, type II (serine/threonine kinase)	0	0	1	0	0	0	1	1	0	1	1
hsa-miR-181a	MIMAT0000256	NM_001222	CAMK2G	calcium/calmodulin-dependent protein kinase (CaM kinase) II gamma	0	0	1	0	0	0	1	1	0	1	1
hsa-miR-181a	MIMAT0000256	NM_001257	CDH13	cadherin 13, H-cadherin (heart)	0	0	1	0	0	0	1	1	0	1	1
hsa-miR-181a	MIMAT0000256	NM_001300	KLF6	Kruppel-like factor 6	0	0	0	1	0	0	1	1	0	1	1
hsa-miR-181a	MIMAT0000256	NM_001356	DDX3X	DEAD (Asp-Glu-Ala-Asp) box polypeptide 3, X-linked	0	0	1	1	0	0	0	1	0	1	1
hsa-miR-181a	MIMAT0000256	NM_001386	DPYSL2	dihydropyrimidinase-like 2	0	0	0	1	0	0	1	1	0	1	1
hsa-miR-181a	MIMAT0000256	NM_001427	EN2	engrailed homeobox 2	0	0	0	1	0	0	1	1	0	1	1
hsa-miR-181a	MIMAT0000256	NM_001482	GATM	glycine amidinotransferase (L-arginine:glycine amidinotransferase)	0	0	1	1	0	0	1	1	0	1	0
hsa-miR-181a	MIMAT0000256	NM_001554	CYR61	cysteine-rich, angiogenic inducer, 61	0	0	0	1	0	0	1	1	0	1	1
hsa-miR-181a	MIMAT0000256	NM_001619	ADRBK1	adrenergic, beta, receptor kinase 1	0	0	1	1	0	0	0	1	0	1	1
hsa-miR-181a	MIMAT0000256	NM_001683	ATP2B2	ATPase, Ca++ transporting, plasma membrane 2	0	0	1	1	0	0	1	1	0	1	0
hsa-miR-181a	MIMAT0000256	NM_001704	BAI3	brain-specific angiogenesis inhibitor 3	0	0	0	1	0	0	1	1	0	1	1
hsa-miR-181a	MIMAT0000256	NM_001781	CD69	CD69 molecule	0	0	1	1	0	0	0	1	0	1	1
hsa-miR-181a	MIMAT0000256	NM_001856	COL16A1	collagen, type XVI, alpha 1	0	0	1	0	0	0	1	1	0	1	1
hsa-miR-181a	MIMAT0000256	NM_001951	E2F5	E2F transcription factor 5, p130-binding	0	0	1	1	0	0	1	1	0	1	0
hsa-miR-181a	MIMAT0000256	NM_001967	EIF4A2	eukaryotic translation initiation factor 4A, isoform 2	0	0	0	1	0	0	1	1	0	1	1
hsa-miR-181a	MIMAT0000256	NM_001999	FBN2	fibrillin 2 (congenital contractural arachnodactyly)	0	0	1	1	0	0	1	1	0	1	0
hsa-miR-181a	MIMAT0000256	NM_002077	GOLGA1	golgi autoantigen, golgin subfamily a, 1	0	0	1	0	0	0	1	1	0	1	1
hsa-miR-181a	MIMAT0000256	NM_002147	HOXB5	homeobox B5	0	0	1	0	0	0	1	1	0	1	1
hsa-miR-181a	MIMAT0000256	NM_002296	LBR	lamin B receptor	0	0	0	1	0	0	1	1	0	1	1
hsa-miR-181a	MIMAT0000256	NM_002446	MAP3K10	mitogen-activated protein kinase kinase kinase 10	0	0	1	0	0	0	1	1	0	1	1
hsa-miR-181a	MIMAT0000256	NM_002481	PPP1R12B	protein phosphatase 1, regulatory (inhibitor) subunit 12B	0	0	1	1	0	0	1	1	0	1	0
hsa-miR-181a	MIMAT0000256	NM_002515	NOVA1	neuro-oncological ventral antigen 1	0	0	0	1	0	0	1	1	0	1	1
hsa-miR-181a	MIMAT0000256	NM_002546	TNFRSF11B	tumor necrosis factor receptor superfamily, member 11b (osteoprotegerin)	0	0	1	1	0	0	0	1	0	1	1
hsa-miR-181a	MIMAT0000256	NM_002583	PAWR	PRKC, apoptosis, WT1, regulator	0	0	0	1	0	0	1	1	0	1	1
hsa-miR-181a	MIMAT0000256	NM_002612	PDK4	pyruvate dehydrogenase kinase, isozyme 4	0	0	1	0	0	0	1	1	0	1	1
hsa-miR-181a	MIMAT0000256	NM_002670	PLS1	plastin 1 (I isoform)	0	0	1	0	0	0	1	1	0	1	1
hsa-miR-181a	MIMAT0000256	NM_002709	PPP1CB	protein phosphatase 1, catalytic subunit, beta isoform	0	0	1	0	0	0	1	1	0	1	1
hsa-miR-181a	MIMAT0000256	NM_002745	MAPK1	mitogen-activated protein kinase 1	0	0	1	1	0	0	0	1	0	1	1
hsa-miR-181a	MIMAT0000256	NM_003161	RPS6KB1	ribosomal protein S6 kinase, 70kDa, polypeptide 1	0	0	1	1	0	0	0	1	0	1	1
hsa-miR-181a	MIMAT0000256	NM_003298	NR2C2	nuclear receptor subfamily 2, group C, member 2	0	0	1	1	0	0	0	1	0	1	1
hsa-miR-181a	MIMAT0000256	NM_003299	HSP90B1	heat shock protein 90kDa beta (Grp94), member 1	0	0	0	1	0	0	1	1	0	1	1
hsa-miR-181a	MIMAT0000256	NM_003457	ZNF207	zinc finger protein 207	0	0	1	0	0	0	1	1	0	1	1
hsa-miR-181a	MIMAT0000256	NM_003498	SNN	stannin	0	0	1	0	0	0	1	1	0	1	1
hsa-miR-181a	MIMAT0000256	NM_003655	CBX4	chromobox homolog 4 (Pc class homolog, Drosophila)	0	0	1	1	0	0	0	1	0	1	1
hsa-miR-181a	MIMAT0000256	NM_003670	BHLHB2	basic helix-loop-helix domain containing, class B, 2	0	0	0	1	0	0	1	1	0	1	1
hsa-miR-181a	MIMAT0000256	NM_003797	EED	embryonic ectoderm development	0	0	1	1	0	0	1	1	0	1	0
hsa-miR-181a	MIMAT0000256	NM_003799	RNMT	RNA (guanine-7-) methyltransferase	0	0	1	1	0	0	0	1	0	1	1
hsa-miR-181a	MIMAT0000256	NM_003924	PHOX2B	paired-like homeobox 2b	0	0	1	0	0	0	1	1	0	1	1
hsa-miR-181a	MIMAT0000256	NM_004379	CREB1	cAMP responsive element binding protein 1	0	0	1	0	0	0	1	1	0	1	1
hsa-miR-181a	MIMAT0000256	NM_004419	DUSP5	dual specificity phosphatase 5	0	0	0	1	0	0	1	1	0	1	1
hsa-miR-181a	MIMAT0000256	NM_004430	EGR3	early growth response 3	0	0	1	0	0	0	1	1	0	1	1
hsa-miR-181a	MIMAT0000256	NM_004432	ELAVL2	ELAV (embryonic lethal, abnormal vision, Drosophila)-like 2 (Hu antigen B)	0	0	1	1	0	0	0	1	0	1	1
hsa-miR-181a	MIMAT0000256	NM_004438	EPHA4	EPH receptor A4	0	0	1	0	0	0	1	1	0	1	1
hsa-miR-181a	MIMAT0000256	NM_004459	BPTF	bromodomain PHD finger transcription factor	0	0	1	0	0	0	1	1	0	1	1
hsa-miR-181a	MIMAT0000256	NM_004504	HRB	HIV-1 Rev binding protein	0	0	1	0	0	0	1	1	0	1	1
hsa-miR-181a	MIMAT0000256	NM_004571	PKNOX1	PBX/knotted 1 homeobox 1	0	0	1	1	0	0	1	1	0	1	0
hsa-miR-181a	MIMAT0000256	NM_004586	RPS6KA3	ribosomal protein S6 kinase, 90kDa, polypeptide 3	0	0	1	1	0	0	0	1	0	1	1
hsa-miR-181a	MIMAT0000256	NM_004612	TGFBR1	transforming growth factor, beta receptor I (activin A receptor type II-like kinase, 53kDa)	0	0	1	1	0	0	0	1	0	1	1
hsa-miR-181a	MIMAT0000256	NM_004730	ETF1	eukaryotic translation termination factor 1	0	0	1	0	0	0	1	1	0	1	1
hsa-miR-181a	MIMAT0000256	NM_004745	DLGAP2	discs, large (Drosophila) homolog-associated protein 2	0	0	1	1	0	0	0	1	0	1	1
hsa-miR-181a	MIMAT0000256	NM_004801	NRXN1	neurexin 1	0	0	0	1	0	0	1	1	0	1	1
hsa-miR-181a	MIMAT0000256	NM_004808	NMT2	N-myristoyltransferase 2	0	0	0	1	0	0	1	1	0	1	1
hsa-miR-181a	MIMAT0000256	NM_004824	CDYL	chromodomain protein, Y-like	0	0	0	1	0	0	1	1	0	1	1
hsa-miR-181a	MIMAT0000256	NM_004842	AKAP7	A kinase (PRKA) anchor protein 7	0	0	1	1	0	0	1	1	0	1	0
hsa-miR-181a	MIMAT0000256	NM_004849	ATG5	ATG5 autophagy related 5 homolog (S. cerevisiae)	0	0	0	1	0	0	1	1	0	1	1
hsa-miR-181a	MIMAT0000256	NM_004992	MECP2	methyl CpG binding protein 2 (Rett syndrome)	0	0	1	0	0	0	1	1	0	1	1
hsa-miR-181a	MIMAT0000256	NM_004995	MMP14	matrix metallopeptidase 14 (membrane-inserted)	0	0	1	0	0	0	1	1	0	1	1
hsa-miR-181a	MIMAT0000256	NM_005056	JARID1A	jumonji, AT rich interactive domain 1A	0	0	1	1	0	0	1	1	0	1	0
hsa-miR-181a	MIMAT0000256	NM_005156	ROD1	ROD1 regulator of differentiation 1 (S. pombe)	0	0	1	1	0	0	0	1	0	1	1
hsa-miR-181a	MIMAT0000256	NM_005187	CBFA2T3	core-binding factor, runt domain, alpha subunit 2; translocated to, 3	0	0	1	0	0	0	1	1	0	1	1
hsa-miR-181a	MIMAT0000256	NM_005238	ETS1	v-ets erythroblastosis virus E26 oncogene homolog 1 (avian)	0	0	1	0	0	0	1	1	0	1	1
hsa-miR-181a	MIMAT0000256	NM_005252	FOS	v-fos FBJ murine osteosarcoma viral oncogene homolog	0	0	1	0	0	0	1	1	0	1	1
hsa-miR-181a	MIMAT0000256	NM_005257	GATA6	GATA binding protein 6	0	0	0	1	0	0	1	1	0	1	1
hsa-miR-181a	MIMAT0000256	NM_005486	TOM1L1	target of myb1 (chicken)-like 1	0	0	0	1	0	0	1	1	0	1	1
hsa-miR-181a	MIMAT0000256	NM_005522	HOXA1	homeobox A1	0	0	1	1	0	0	0	1	0	1	1
hsa-miR-181a	MIMAT0000256	NM_005539	INPP5A	inositol polyphosphate-5-phosphatase, 40kDa	0	0	0	1	0	0	1	1	0	1	1
hsa-miR-181a	MIMAT0000256	NM_005578	LPP	LIM domain containing preferred translocation partner in lipoma	0	0	0	1	0	0	1	1	0	1	1
hsa-miR-181a	MIMAT0000256	NM_005596	NFIB	nuclear factor I/B	0	0	1	1	0	0	0	1	0	1	1
hsa-miR-181a	MIMAT0000256	NM_005647	TBL1X	transducin (beta)-like 1X-linked	0	0	1	1	0	0	0	1	0	1	1
hsa-miR-181a	MIMAT0000256	NM_005742	PDIA6	protein disulfide isomerase family A, member 6	0	0	1	0	0	0	1	1	0	1	1
hsa-miR-181a	MIMAT0000256	NM_005808	CTDSPL	CTD (carboxy-terminal domain, RNA polymerase II, polypeptide A) small phosphatase-like	0	0	1	1	0	0	1	1	0	1	0
hsa-miR-181a	MIMAT0000256	NM_005904	SMAD7	SMAD family member 7	0	0	1	0	0	0	1	1	0	1	1
hsa-miR-181a	MIMAT0000256	NM_005909	MAP1B	microtubule-associated protein 1B	0	0	0	1	0	0	1	1	0	1	1
hsa-miR-181a	MIMAT0000256	NM_005911	MAT2A	methionine adenosyltransferase II, alpha	0	0	0	1	0	0	1	1	0	1	1
hsa-miR-181a	MIMAT0000256	NM_005964	MYH10	myosin, heavy chain 10, non-muscle	0	0	1	0	0	0	1	1	0	1	1
hsa-miR-181a	MIMAT0000256	NM_006099	PIAS3	protein inhibitor of activated STAT, 3	0	0	1	0	0	0	1	1	0	1	1
hsa-miR-181a	MIMAT0000256	NM_006310	NPEPPS	aminopeptidase puromycin sensitive	0	0	0	1	0	0	1	1	0	1	1
hsa-miR-181a	MIMAT0000256	NM_006359	SLC9A6	solute carrier family 9 (sodium/hydrogen exchanger), member 6	0	0	1	1	0	0	1	1	0	1	0
hsa-miR-181a	MIMAT0000256	NM_006390	IPO8	importin 8	0	0	1	1	0	0	1	1	0	1	0
hsa-miR-181a	MIMAT0000256	NM_006420	ARFGEF2	ADP-ribosylation factor guanine nucleotide-exchange factor 2 (brefeldin A-inhibited)	0	0	1	0	0	0	1	1	0	1	1
hsa-miR-181a	MIMAT0000256	NM_006538	BCL2L11	BCL2-like 11 (apoptosis facilitator)	0	0	1	0	0	0	1	1	0	1	1
hsa-miR-181a	MIMAT0000256	NM_006540	NCOA2	nuclear receptor coactivator 2	0	0	0	1	0	0	1	1	0	1	1
hsa-miR-181a	MIMAT0000256	NM_006548	IGF2BP2	insulin-like growth factor 2 mRNA binding protein 2	0	0	1	1	0	0	1	1	0	1	0
hsa-miR-181a	MIMAT0000256	NM_006726	LRBA	LPS-responsive vesicle trafficking, beach and anchor containing	0	0	0	1	0	0	1	1	0	1	1
hsa-miR-181a	MIMAT0000256	NM_006931	SLC2A3	solute carrier family 2 (facilitated glucose transporter), member 3	0	0	1	0	0	0	1	1	0	1	1
hsa-miR-181a	MIMAT0000256	NM_007038	ADAMTS5	ADAM metallopeptidase with thrombospondin type 1 motif, 5 (aggrecanase-2)	0	0	1	1	0	0	0	1	0	1	1
hsa-miR-181a	MIMAT0000256	NM_007106	UBL3	ubiquitin-like 3	0	0	1	1	0	0	0	1	0	1	1
hsa-miR-181a	MIMAT0000256	NM_007350	PHLDA1	pleckstrin homology-like domain, family A, member 1	0	0	1	0	0	0	1	1	0	1	1
hsa-miR-181a	MIMAT0000256	NM_012064	MIP	major intrinsic protein of lens fiber	0	0	1	1	0	0	0	1	0	1	1
hsa-miR-181a	MIMAT0000256	NM_012218	ILF3	interleukin enhancer binding factor 3, 90kDa	0	0	1	1	0	0	0	1	0	1	1
hsa-miR-181a	MIMAT0000256	NM_012259	HEY2	hairy/enhancer-of-split related with YRPW motif 2	0	0	1	1	0	0	0	1	0	1	1
hsa-miR-181a	MIMAT0000256	NM_012287	CENTB2	centaurin, beta 2	0	0	1	0	0	0	1	1	0	1	1
hsa-miR-181a	MIMAT0000256	NM_013437	LRP12	low density lipoprotein-related protein 12	0	0	0	1	0	0	1	1	0	1	1
hsa-miR-181a	MIMAT0000256	NM_013449	BAZ2A	bromodomain adjacent to zinc finger domain, 2A	0	0	1	0	0	0	1	1	0	1	1
hsa-miR-181a	MIMAT0000256	NM_013450	BAZ2B	bromodomain adjacent to zinc finger domain, 2B	0	0	0	1	0	0	1	1	0	1	1
hsa-miR-181a	MIMAT0000256	NM_014023	WDR37	WD repeat domain 37	0	0	1	0	0	0	1	1	0	1	1
hsa-miR-181a	MIMAT0000256	NM_014515	CNOT2	CCR4-NOT transcription complex, subunit 2	0	0	1	1	0	0	0	1	0	1	1
hsa-miR-181a	MIMAT0000256	NM_014575	SCHIP1	schwannomin interacting protein 1	0	0	1	0	0	0	1	1	0	1	1
hsa-miR-181a	MIMAT0000256	NM_014615	KIAA0182	KIAA0182	0	0	1	0	0	0	1	1	0	1	1
hsa-miR-181a	MIMAT0000256	NM_014689	DOCK10	dedicator of cytokinesis 10	0	0	1	1	0	0	0	1	0	1	1
hsa-miR-181a	MIMAT0000256	NM_014705	DOCK4	dedicator of cytokinesis 4	0	0	1	1	0	0	0	1	0	1	1
hsa-miR-181a	MIMAT0000256	NM_014764	DAZAP2	DAZ associated protein 2	0	0	0	1	0	0	1	1	0	1	1
hsa-miR-181a	MIMAT0000256	NM_014779	TSC22D2	TSC22 domain family, member 2	0	0	0	1	0	0	1	1	0	1	1
hsa-miR-181a	MIMAT0000256	NM_014826	CDC42BPA	CDC42 binding protein kinase alpha (DMPK-like)	0	0	1	1	0	0	1	1	0	1	0
hsa-miR-181a	MIMAT0000256	NM_014832	TBC1D4	TBC1 domain family, member 4	0	0	1	1	0	0	0	1	0	1	1
hsa-miR-181a	MIMAT0000256	NM_014904	RAB11FIP2	RAB11 family interacting protein 2 (class I)	0	0	1	0	0	0	1	1	0	1	1
hsa-miR-181a	MIMAT0000256	NM_015017	USP33	ubiquitin specific peptidase 33	0	0	0	1	0	0	1	1	0	1	1
hsa-miR-181a	MIMAT0000256	NM_015049	TRAK2	trafficking protein, kinesin binding 2	0	0	1	0	0	0	1	1	0	1	1
hsa-miR-181a	MIMAT0000256	NM_015138	RTF1	Rtf1, Paf1/RNA polymerase II complex component, homolog (S. cerevisiae)	0	0	1	0	0	0	1	1	0	1	1
hsa-miR-181a	MIMAT0000256	NM_015143	METAP1	methionyl aminopeptidase 1	0	0	1	1	0	0	0	1	0	1	1
hsa-miR-181a	MIMAT0000256	NM_015173	TBC1D1	TBC1 (tre-2/USP6, BUB2, cdc16) domain family, member 1	0	0	0	1	0	0	1	1	0	1	1
hsa-miR-181a	MIMAT0000256	NM_015184	PLCL2	phospholipase C-like 2	0	0	1	0	0	0	1	1	0	1	1
hsa-miR-181a	MIMAT0000256	NM_015210	KIAA0802	KIAA0802	0	0	1	0	0	0	1	1	0	1	1
hsa-miR-181a	MIMAT0000256	NM_015330	SPECC1L	SPECC1-like	0	0	1	0	0	0	1	1	0	1	1
hsa-miR-181a	MIMAT0000256	NM_015447	CAMSAP1	calmodulin regulated spectrin-associated protein 1	0	0	1	0	0	0	1	1	0	1	1
hsa-miR-181a	MIMAT0000256	NM_015458	MTMR9	myotubularin related protein 9	0	0	1	1	0	0	0	1	0	1	1
hsa-miR-181a	MIMAT0000256	NM_015474	SAMHD1	SAM domain and HD domain 1	0	0	1	1	0	0	0	1	0	1	1
hsa-miR-181a	MIMAT0000256	NM_015626	WSB1	WD repeat and SOCS box-containing 1	0	0	1	0	0	0	1	1	0	1	1
hsa-miR-181a	MIMAT0000256	NM_015646	RAP1B	RAP1B, member of RAS oncogene family	0	0	1	1	0	0	1	1	0	1	0
hsa-miR-181a	MIMAT0000256	NM_015833	ADARB1	adenosine deaminase, RNA-specific, B1 (RED1 homolog rat)	0	0	1	1	0	0	1	1	0	1	0
hsa-miR-181a	MIMAT0000256	NM_015834	ADARB1	adenosine deaminase, RNA-specific, B1 (RED1 homolog rat)	0	0	1	1	0	0	1	1	0	1	0
hsa-miR-181a	MIMAT0000256	NM_016083	CNR1	cannabinoid receptor 1 (brain)	0	0	1	0	0	0	1	1	0	1	1
hsa-miR-181a	MIMAT0000256	NM_016217	HECA	headcase homolog (Drosophila)	0	0	0	1	0	0	1	1	0	1	1
hsa-miR-181a	MIMAT0000256	NM_016231	NLK	nemo-like kinase	0	0	1	0	0	0	1	1	0	1	1
hsa-miR-181a	MIMAT0000256	NM_016258	YTHDF2	YTH domain family, member 2	0	0	1	0	0	0	1	1	0	1	1
hsa-miR-181a	MIMAT0000256	NM_016377	AKAP7	A kinase (PRKA) anchor protein 7	0	0	1	1	0	0	1	1	0	1	0
hsa-miR-181a	MIMAT0000256	NM_016441	CRIM1	cysteine rich transmembrane BMP regulator 1 (chordin-like)	0	0	1	0	0	0	1	1	0	1	1
hsa-miR-181a	MIMAT0000256	NM_016603	FAM13B1	family with sequence similarity 13, member B1	0	0	0	1	0	0	1	1	0	1	1
hsa-miR-181a	MIMAT0000256	NM_016612	SLC25A37	solute carrier family 25, member 37	0	0	1	1	0	0	0	1	0	1	1
hsa-miR-181a	MIMAT0000256	NM_016626	MEX3C	mex-3 homolog C (C. elegans)	0	0	1	0	0	0	1	1	0	1	1
hsa-miR-181a	MIMAT0000256	NM_016932	SIX2	SIX homeobox 2	0	0	1	0	0	0	1	1	0	1	1
hsa-miR-181a	MIMAT0000256	NM_016952	CDON	Cdon homolog (mouse)	0	0	1	1	0	0	0	1	0	1	1
hsa-miR-181a	MIMAT0000256	NM_017450	BAIAP2	BAI1-associated protein 2	0	0	1	0	0	0	1	1	0	1	1
hsa-miR-181a	MIMAT0000256	NM_017508	SOX6	SRY (sex determining region Y)-box 6	0	0	1	1	0	0	0	1	0	1	1
hsa-miR-181a	MIMAT0000256	NM_017632	CDKN2AIP	CDKN2A interacting protein	0	0	0	1	0	0	1	1	0	1	1
hsa-miR-181a	MIMAT0000256	NM_017649	CNNM2	cyclin M2	0	0	1	1	0	0	0	1	0	1	1
hsa-miR-181a	MIMAT0000256	NM_017780	CHD7	chromodomain helicase DNA binding protein 7	0	0	1	0	0	0	1	1	0	1	1
hsa-miR-181a	MIMAT0000256	NM_018047	RBM22	RNA binding motif protein 22	0	0	1	0	0	0	1	1	0	1	1
hsa-miR-181a	MIMAT0000256	NM_018049	PLEKHJ1	pleckstrin homology domain containing, family J member 1	0	0	1	0	0	0	1	1	0	1	1
hsa-miR-181a	MIMAT0000256	NM_018121	C10orf6	chromosome 10 open reading frame 6	0	0	1	1	0	0	0	1	0	1	1
hsa-miR-181a	MIMAT0000256	NM_018362	LIN7C	lin-7 homolog C (C. elegans)	0	0	1	0	0	0	1	1	0	1	1
hsa-miR-181a	MIMAT0000256	NM_018364	RSBN1	round spermatid basic protein 1	0	0	1	0	0	0	1	1	0	1	1
hsa-miR-181a	MIMAT0000256	NM_018425	PI4K2A	phosphatidylinositol 4-kinase type 2 alpha	0	0	1	0	0	0	1	1	0	1	1
hsa-miR-181a	MIMAT0000256	NM_018640	LMO3	LIM domain only 3 (rhombotin-like 2)	0	0	1	1	0	0	1	1	0	1	0
hsa-miR-181a	MIMAT0000256	NM_018898	PCDHAC1	protocadherin alpha subfamily C, 1	0	0	0	1	0	0	1	1	0	1	1
hsa-miR-181a	MIMAT0000256	NM_018902	PCDHA11	protocadherin alpha 11	0	0	1	1	0	0	1	1	0	1	0
hsa-miR-181a	MIMAT0000256	NM_018909	PCDHA6	protocadherin alpha 6	0	0	0	1	0	0	1	1	0	1	1
hsa-miR-181a	MIMAT0000256	NM_018993	RIN2	Ras and Rab interactor 2	0	0	1	1	0	0	0	1	0	1	1
hsa-miR-181a	MIMAT0000256	NM_018999	KIAA1128	KIAA1128	0	0	1	0	0	0	1	1	0	1	1
hsa-miR-181a	MIMAT0000256	NM_019091	PLEKHA3	pleckstrin homology domain containing, family A (phosphoinositide binding specific) member 3	0	0	1	1	0	0	0	1	0	1	1
hsa-miR-181a	MIMAT0000256	NM_019106	SEPT3	septin 3	0	0	1	0	0	0	1	1	0	1	1
hsa-miR-181a	MIMAT0000256	NM_020123	TM9SF3	transmembrane 9 superfamily member 3	0	0	1	0	0	0	1	1	0	1	1
hsa-miR-181a	MIMAT0000256	NM_020148	SPIRE1	spire homolog 1 (Drosophila)	0	0	1	1	0	0	0	1	0	1	1
hsa-miR-181a	MIMAT0000256	NM_020211	RGMA	RGM domain family, member A	0	0	1	0	0	0	1	1	0	1	1
hsa-miR-181a	MIMAT0000256	NM_020336	KIAA1219	KIAA1219	0	0	1	1	0	0	0	1	0	1	1
hsa-miR-181a	MIMAT0000256	NM_020337	ANKRD50	ankyrin repeat domain 50	0	0	1	1	0	0	0	1	0	1	1
hsa-miR-181a	MIMAT0000256	NM_020357	PCNP	PEST proteolytic signal containing nuclear protein	0	0	0	1	0	0	1	1	0	1	1
hsa-miR-181a	MIMAT0000256	NM_020640	DCUN1D1	DCN1, defective in cullin neddylation 1, domain containing 1 (S. cerevisiae)	0	0	1	0	0	0	1	1	0	1	1
hsa-miR-181a	MIMAT0000256	NM_020801	ARRDC3	arrestin domain containing 3	0	0	1	0	0	0	1	1	0	1	1
hsa-miR-181a	MIMAT0000256	NM_020841	OSBPL8	oxysterol binding protein-like 8	0	0	1	1	0	0	1	1	0	1	0
hsa-miR-181a	MIMAT0000256	NM_021116	ADCY1	adenylate cyclase 1 (brain)	0	0	1	0	0	0	1	1	0	1	1
hsa-miR-181a	MIMAT0000256	NM_021239	RBM25	RNA binding motif protein 25	0	0	1	1	0	0	0	1	0	1	1
hsa-miR-181a	MIMAT0000256	NM_021982	SEC24A	SEC24 related gene family, member A (S. cerevisiae)	0	0	1	1	0	0	0	1	0	1	1
hsa-miR-181a	MIMAT0000256	NM_022048	CSNK1G1	casein kinase 1, gamma 1	0	0	1	0	0	0	1	1	0	1	1
hsa-miR-181a	MIMAT0000256	NM_022474	MPP5	membrane protein, palmitoylated 5 (MAGUK p55 subfamily member 5)	0	0	0	1	0	0	1	1	0	1	1
hsa-miR-181a	MIMAT0000256	NM_022658	HOXC8	homeobox C8	0	0	0	1	0	0	1	1	0	1	1
hsa-miR-181a	MIMAT0000256	NM_022753	S100PBP	S100P binding protein	0	0	1	0	0	0	1	1	0	1	1
hsa-miR-181a	MIMAT0000256	NM_022817	PER2	period homolog 2 (Drosophila)	0	0	1	0	0	0	1	1	0	1	1
hsa-miR-181a	MIMAT0000256	NM_022893	BCL11A	B-cell CLL/lymphoma 11A (zinc finger protein)	0	0	1	1	0	0	0	1	0	1	1
hsa-miR-181a	MIMAT0000256	NM_022913	GPBP1	GC-rich promoter binding protein 1	0	0	0	1	0	0	1	1	0	1	1
hsa-miR-181a	MIMAT0000256	NM_024590	ARSJ	arylsulfatase family, member J	0	0	0	1	0	0	1	1	0	1	1
hsa-miR-181a	MIMAT0000256	NM_025126	RNF34	ring finger protein 34	0	0	0	1	0	0	1	1	0	1	1
hsa-miR-181a	MIMAT0000256	NM_025133	FBXO11	F-box protein 11	0	0	1	0	0	0	1	1	0	1	1
hsa-miR-181a	MIMAT0000256	NM_025138	C13orf23	chromosome 13 open reading frame 23	0	0	1	1	0	0	1	1	0	1	0
hsa-miR-181a	MIMAT0000256	NM_025146	NAT13	N-acetyltransferase 13	0	0	1	0	0	0	1	1	0	1	1
hsa-miR-181a	MIMAT0000256	NM_030816	ANKRD13C	ankyrin repeat domain 13C	0	0	0	1	0	0	1	1	0	1	1
hsa-miR-181a	MIMAT0000256	NM_031849	PCDHA6	protocadherin alpha 6	0	0	1	1	0	0	1	1	0	1	0
hsa-miR-181a	MIMAT0000256	NM_032127	FAM160A2	family with sequence similarity 160, member A2	0	0	0	1	0	0	1	1	0	1	1
hsa-miR-181a	MIMAT0000256	NM_032172	USP42	ubiquitin specific peptidase 42	0	0	1	1	0	0	0	1	0	1	1
hsa-miR-181a	MIMAT0000256	NM_032246	MEX3B	mex-3 homolog B (C. elegans)	0	0	1	0	0	0	1	1	0	1	1
hsa-miR-181a	MIMAT0000256	NM_032547	SCOC	short coiled-coil protein	0	0	0	1	0	0	1	1	0	1	1
hsa-miR-181a	MIMAT0000256	NM_032804	ADO	2-aminoethanethiol (cysteamine) dioxygenase	0	0	0	1	0	0	1	1	0	1	1
hsa-miR-181a	MIMAT0000256	NM_032809	FAM73B	family with sequence similarity 73, member B	0	0	1	0	0	0	1	1	0	1	1
hsa-miR-181a	MIMAT0000256	NM_033224	PURB	purine-rich element binding protein B	0	0	1	0	0	0	1	1	0	1	1
hsa-miR-181a	MIMAT0000256	NM_033326	SOX6	SRY (sex determining region Y)-box 6	0	0	1	1	0	0	1	1	0	1	0
hsa-miR-181a	MIMAT0000256	NM_033360	KRAS	v-Ki-ras2 Kirsten rat sarcoma viral oncogene homolog	0	0	1	1	0	0	1	1	0	1	0
hsa-miR-181a	MIMAT0000256	NM_033407	DOCK7	dedicator of cytokinesis 7	0	0	0	1	0	0	1	1	0	1	1
hsa-miR-181a	MIMAT0000256	NM_033655	CNTNAP3	contactin associated protein-like 3	0	0	1	0	0	0	1	1	0	1	1
hsa-miR-181a	MIMAT0000256	NM_033656	BRWD1	bromodomain and WD repeat domain containing 1	0	0	1	1	0	0	0	1	0	1	1
hsa-miR-181a	MIMAT0000256	NM_052879	LARP4	La ribonucleoprotein domain family, member 4	0	0	1	1	0	0	0	1	0	1	1
hsa-miR-181a	MIMAT0000256	NM_052901	SLC25A25	solute carrier family 25 (mitochondrial carrier; phosphate carrier), member 25	0	0	1	1	0	0	1	1	0	1	0
hsa-miR-181a	MIMAT0000256	NM_052905	FMNL2	formin-like 2	0	0	1	1	0	0	0	1	0	1	1
hsa-miR-181a	MIMAT0000256	NM_057175	NARG1	NMDA receptor regulated 1	0	0	1	0	0	0	1	1	0	1	1
hsa-miR-181a	MIMAT0000256	NM_080927	DCBLD2	discoidin, CUB and LCCL domain containing 2	0	0	1	1	0	0	0	1	0	1	1
hsa-miR-181a	MIMAT0000256	NM_133370	YTHDC1	YTH domain containing 1	0	0	1	1	0	0	1	1	0	1	0
hsa-miR-181a	MIMAT0000256	NM_138494	ZNF655	zinc finger protein 655	0	0	1	1	0	0	1	1	0	1	0
hsa-miR-181a	MIMAT0000256	NM_138633	AKAP7	A kinase (PRKA) anchor protein 7	0	0	1	1	0	0	1	1	0	1	0
hsa-miR-181a	MIMAT0000256	NM_138713	NFAT5	nuclear factor of activated T-cells 5, tonicity-responsive	0	0	1	1	0	0	1	1	0	1	0
hsa-miR-181a	MIMAT0000256	NM_138714	NFAT5	nuclear factor of activated T-cells 5, tonicity-responsive	0	0	1	1	0	0	1	1	0	1	0
hsa-miR-181a	MIMAT0000256	NM_138766	PAM	peptidylglycine alpha-amidating monooxygenase	0	0	1	1	0	0	1	1	0	1	0
hsa-miR-181a	MIMAT0000256	NM_138822	PAM	peptidylglycine alpha-amidating monooxygenase	0	0	1	1	0	0	1	1	0	1	0
hsa-miR-181a	MIMAT0000256	NM_144778	MBNL2	muscleblind-like 2 (Drosophila)	0	0	1	0	0	0	1	1	0	1	1
hsa-miR-181a	MIMAT0000256	NM_145320	OSBPL3	oxysterol binding protein-like 3	0	0	1	1	0	0	1	1	0	1	0
hsa-miR-181a	MIMAT0000256	NM_145321	OSBPL3	oxysterol binding protein-like 3	0	0	1	1	0	0	1	1	0	1	0
hsa-miR-181a	MIMAT0000256	NM_145322	OSBPL3	oxysterol binding protein-like 3	0	0	1	1	0	0	1	1	0	1	0
hsa-miR-181a	MIMAT0000256	NM_145735	ARHGEF7	Rho guanine nucleotide exchange factor (GEF) 7	0	0	0	1	0	0	1	1	0	1	1
hsa-miR-181a	MIMAT0000256	NM_145808	MTPN	myotrophin	0	0	1	0	0	0	1	1	0	1	1
hsa-miR-181a	MIMAT0000256	NM_152271	LONRF1	LON peptidase N-terminal domain and ring finger 1	0	0	0	1	0	0	1	1	0	1	1
hsa-miR-181a	MIMAT0000256	NM_152622	MIER3	mesoderm induction early response 1, family member 3	0	0	1	1	0	0	0	1	0	1	1
hsa-miR-181a	MIMAT0000256	NM_152727	CPNE2	copine II	0	0	1	1	0	0	0	1	0	1	1
hsa-miR-181a	MIMAT0000256	NM_152758	YTHDF3	YTH domain family, member 3	0	0	1	0	0	0	1	1	0	1	1
hsa-miR-181a	MIMAT0000256	NM_152787	MAP3K7IP3	mitogen-activated protein kinase kinase kinase 7 interacting protein 3	0	0	1	0	0	0	1	1	0	1	1
hsa-miR-181a	MIMAT0000256	NM_152989	SOX5	SRY (sex determining region Y)-box 5	0	0	1	1	0	0	1	1	0	1	0
hsa-miR-181a	MIMAT0000256	NM_153607	C5orf41	chromosome 5 open reading frame 41	0	0	1	1	0	0	0	1	0	1	1
hsa-miR-181a	MIMAT0000256	NM_153689	FLJ38973	hypothetical protein FLJ38973	0	0	0	1	0	0	1	1	0	1	1
hsa-miR-181a	MIMAT0000256	NM_170662	CBLB	Cas-Br-M (murine) ecotropic retroviral transforming sequence b	0	0	0	1	0	0	1	1	0	1	1
hsa-miR-181a	MIMAT0000256	NM_170665	ATP2A2	ATPase, Ca++ transporting, cardiac muscle, slow twitch 2	0	0	0	1	0	0	1	1	0	1	1
hsa-miR-181a	MIMAT0000256	NM_170719	C13orf23	chromosome 13 open reading frame 23	0	0	1	1	0	0	1	1	0	1	0
hsa-miR-181a	MIMAT0000256	NM_170751	CDYL	chromodomain protein, Y-like	0	0	1	1	0	0	1	1	0	1	0
hsa-miR-181a	MIMAT0000256	NM_170752	CDYL	chromodomain protein, Y-like	0	0	1	1	0	0	1	1	0	1	0
hsa-miR-181a	MIMAT0000256	NM_172020	POM121	POM121 membrane glycoprotein (rat)	0	0	0	1	0	0	1	1	0	1	1
hsa-miR-181a	MIMAT0000256	NM_173198	NR4A3	nuclear receptor subfamily 4, group A, member 3	0	0	1	1	0	0	1	1	0	1	0
hsa-miR-181a	MIMAT0000256	NM_173200	NR4A3	nuclear receptor subfamily 4, group A, member 3	0	0	1	1	0	0	1	1	0	1	0
hsa-miR-181a	MIMAT0000256	NM_173214	NFAT5	nuclear factor of activated T-cells 5, tonicity-responsive	0	0	1	1	0	0	1	1	0	1	0
hsa-miR-181a	MIMAT0000256	NM_173694	ATP11C	ATPase, class VI, type 11C	0	0	1	1	0	0	1	1	0	1	0
hsa-miR-181a	MIMAT0000256	NM_175061	JAZF1	JAZF zinc finger 1	0	0	1	0	0	0	1	1	0	1	1
hsa-miR-181a	MIMAT0000256	NM_175612	CNTN4	contactin 4	0	0	1	1	0	0	1	1	0	1	0
hsa-miR-181a	MIMAT0000256	NM_175768	GRIK2	glutamate receptor, ionotropic, kainate 2	0	0	1	0	0	0	1	1	0	1	1
hsa-miR-181a	MIMAT0000256	NM_177968	PPM1B	protein phosphatase 1B (formerly 2C), magnesium-dependent, beta isoform	0	0	1	1	0	0	0	1	0	1	1
hsa-miR-181a	MIMAT0000256	NM_177985	ARL5A	ADP-ribosylation factor-like 5A	0	0	1	1	0	0	1	1	0	1	0
hsa-miR-181a	MIMAT0000256	NM_178010	SOX5	SRY (sex determining region Y)-box 5	0	0	1	1	0	0	1	1	0	1	0
hsa-miR-181a	MIMAT0000256	NM_178815	ARL5B	ADP-ribosylation factor-like 5B	0	0	1	1	0	0	1	1	0	1	0
hsa-miR-181a	MIMAT0000256	NM_181443	BTBD3	BTB (POZ) domain containing 3	0	0	1	1	0	0	1	1	0	1	0
hsa-miR-181a	MIMAT0000256	NM_181672	OGT	O-linked N-acetylglucosamine (GlcNAc) transferase (UDP-N-acetylglucosamine:polypeptide-N-acetylglucosaminyl transferase)	0	0	1	0	0	0	1	1	0	1	1
hsa-miR-181a	MIMAT0000256	NM_182551	LYCAT	lysocardiolipin acyltransferase	0	0	1	1	0	0	1	1	0	1	0
hsa-miR-181a	MIMAT0000256	NM_182691	SRPK2	SFRS protein kinase 2	0	0	1	1	0	0	0	1	0	1	1
hsa-miR-181a	MIMAT0000256	NM_194278	C14orf43	chromosome 14 open reading frame 43	0	0	1	1	0	0	1	1	0	1	0
hsa-miR-181a	MIMAT0000256	NM_194442	LBR	lamin B receptor	0	0	1	1	0	0	1	1	0	1	0
hsa-miR-181a	MIMAT0000256	NM_197941	ADAMTS6	ADAM metallopeptidase with thrombospondin type 1 motif, 6	0	0	1	0	0	0	1	1	0	1	1
hsa-miR-181a	MIMAT0000256	NM_198240	CLIP1	CAP-GLY domain containing linker protein 1	0	0	1	1	0	0	1	1	0	1	0
hsa-miR-181a	MIMAT0000256	NM_198597	SEC24C	SEC24 related gene family, member C (S. cerevisiae)	0	0	1	1	0	0	1	1	0	1	0
hsa-miR-181a	MIMAT0000256	NM_198963	DHX57	DEAH (Asp-Glu-Ala-Asp/His) box polypeptide 57	0	0	0	1	0	0	1	1	0	1	1
hsa-miR-181a	MIMAT0000256	NM_199324	OTUD4	OTU domain containing 4	0	0	0	1	0	0	1	1	0	1	1
hsa-miR-181a	MIMAT0000256	NM_201542	MED8	mediator complex subunit 8	0	0	1	1	0	0	1	1	0	1	0
hsa-miR-181a	MIMAT0000256	NM_201570	CACNB2	calcium channel, voltage-dependent, beta 2 subunit	0	0	1	1	0	0	1	1	0	1	0
hsa-miR-181a	MIMAT0000256	NM_201572	CACNB2	calcium channel, voltage-dependent, beta 2 subunit	0	0	1	1	0	0	1	1	0	1	0
hsa-miR-181a	MIMAT0000256	NM_201590	CACNB2	calcium channel, voltage-dependent, beta 2 subunit	0	0	1	1	0	0	1	1	0	1	0
hsa-miR-181a	MIMAT0000256	NM_201593	CACNB2	calcium channel, voltage-dependent, beta 2 subunit	0	0	1	1	0	0	1	1	0	1	0
hsa-miR-181a	MIMAT0000256	NM_201596	CACNB2	calcium channel, voltage-dependent, beta 2 subunit	0	0	1	1	0	0	1	1	0	1	0
hsa-miR-181a	MIMAT0000256	NM_201624	USP33	ubiquitin specific peptidase 33	0	0	1	1	0	0	1	1	0	1	0
hsa-miR-181a	MIMAT0000256	NM_203351	MAP3K3	mitogen-activated protein kinase kinase kinase 3	0	0	1	1	0	0	1	1	0	1	0
hsa-miR-181a	MIMAT0000256	NM_203437	AFTPH	aftiphilin	0	0	1	1	0	0	1	1	0	1	0
hsa-miR-181a	MIMAT0000256	NM_203504	G3BP2	GTPase activating protein (SH3 domain) binding protein 2	0	0	1	1	0	0	1	1	0	1	0
hsa-miR-181a	MIMAT0000256	NM_203505	G3BP2	GTPase activating protein (SH3 domain) binding protein 2	0	0	1	1	0	0	1	1	0	1	0
hsa-miR-181a	MIMAT0000256	NM_207015	NAALADL2	N-acetylated alpha-linked acidic dipeptidase-like 2	0	0	1	1	0	0	1	1	0	1	0
hsa-miR-181a	MIMAT0000256	NM_212539	PRKCD	protein kinase C, delta	0	0	1	1	0	0	1	1	0	1	0
hsa-miR-181a	MIMAT0000256	NM_000043	FAS	Fas (TNF receptor superfamily, member 6)	0	0	1	1	0	0	0	1	0	1	0
hsa-miR-181a	MIMAT0000256	NM_000051	ATM	ataxia telangiectasia mutated	0	0	1	1	0	0	0	1	0	1	0
hsa-miR-181a	MIMAT0000256	NM_000055	BCHE	butyrylcholinesterase	0	0	1	1	0	0	0	1	0	1	0
hsa-miR-181a	MIMAT0000256	NM_000097	CPOX	coproporphyrinogen oxidase	0	0	1	1	0	0	0	1	0	1	0
hsa-miR-181a	MIMAT0000256	NM_000128	F11	coagulation factor XI (plasma thromboplastin antecedent)	0	0	1	1	0	0	0	1	0	1	0
hsa-miR-181a	MIMAT0000256	NM_000130	F5	coagulation factor V (proaccelerin, labile factor)	0	0	1	1	0	0	0	1	0	1	0
hsa-miR-181a	MIMAT0000256	NM_000148	FUT1	fucosyltransferase 1 (galactoside 2-alpha-L-fucosyltransferase, H blood group)	0	0	1	1	0	0	0	1	0	1	0
hsa-miR-181a	MIMAT0000256	NM_000189	HK2	hexokinase 2	0	0	1	1	0	0	0	1	0	1	0
hsa-miR-181a	MIMAT0000256	NM_000245	MET	met proto-oncogene (hepatocyte growth factor receptor)	0	0	1	1	0	0	0	1	0	1	0
hsa-miR-181a	MIMAT0000256	NM_000248	MITF	microphthalmia-associated transcription factor	0	0	1	0	0	0	0	1	0	1	1
hsa-miR-181a	MIMAT0000256	NM_000314	PTEN	phosphatase and tensin homolog (mutated in multiple advanced cancers 1)	0	0	1	0	0	0	0	1	0	1	1
hsa-miR-181a	MIMAT0000256	NM_000329	RPE65	retinal pigment epithelium-specific protein 65kDa	0	0	1	1	0	0	0	1	0	1	0
hsa-miR-181a	MIMAT0000256	NM_000439	PCSK1	proprotein convertase subtilisin/kexin type 1	0	0	1	1	0	0	0	1	0	1	0
hsa-miR-181a	MIMAT0000256	NM_000503	EYA1	eyes absent homolog 1 (Drosophila)	0	0	1	0	0	0	1	1	0	1	0
hsa-miR-181a	MIMAT0000256	NM_000578	SLC11A1	solute carrier family 11 (proton-coupled divalent metal ion transporters), member 1	0	0	1	1	0	0	0	1	0	1	0
hsa-miR-181a	MIMAT0000256	NM_000586	IL2	interleukin 2	0	0	1	1	0	0	0	1	0	1	0
hsa-miR-181a	MIMAT0000256	NM_000633	BCL2	B-cell CLL/lymphoma 2	0	0	1	0	0	0	0	1	0	1	1
hsa-miR-181a	MIMAT0000256	NM_000685	AGTR1	angiotensin II receptor, type 1	0	0	1	1	0	0	0	1	0	1	0
hsa-miR-181a	MIMAT0000256	NM_000696	ALDH9A1	aldehyde dehydrogenase 9 family, member A1	0	0	1	1	0	0	0	1	0	1	0
hsa-miR-181a	MIMAT0000256	NM_000793	DIO2	deiodinase, iodothyronine, type II	0	0	1	0	0	0	1	1	0	1	0
hsa-miR-181a	MIMAT0000256	NM_000899	KITLG	KIT ligand	0	0	1	1	0	0	0	1	0	1	0
hsa-miR-181a	MIMAT0000256	NM_000902	MME	membrane metallo-endopeptidase	0	0	1	1	0	0	0	1	0	1	0
hsa-miR-181a	MIMAT0000256	NM_000939	POMC	proopiomelanocortin (adrenocorticotropin/ beta-lipotropin/ alpha-melanocyte stimulating hormone/ beta-melanocyte stimulating hormone/ beta-endorphin)	0	0	1	1	0	0	0	1	0	1	0
hsa-miR-181a	MIMAT0000256	NM_001001132	ITSN1	intersectin 1 (SH3 domain protein)	0	0	0	1	0	0	0	1	0	1	1
hsa-miR-181a	MIMAT0000256	NM_001001550	GRB10	growth factor receptor-bound protein 10	0	0	1	1	0	0	0	1	0	1	0
hsa-miR-181a	MIMAT0000256	NM_001001555	GRB10	growth factor receptor-bound protein 10	0	0	1	1	0	0	0	1	0	1	0
hsa-miR-181a	MIMAT0000256	NM_001001888	VCX3B	variable charge, X-linked 3B	0	0	1	1	0	0	0	1	0	1	0
hsa-miR-181a	MIMAT0000256	NM_001001890	RUNX1	runt-related transcription factor 1 (acute myeloid leukemia 1; aml1 oncogene)	0	0	0	0	0	0	1	1	0	1	1
hsa-miR-181a	MIMAT0000256	NM_001001924	MTUS1	mitochondrial tumor suppressor 1	0	0	1	1	0	0	0	1	0	1	0
hsa-miR-181a	MIMAT0000256	NM_001001931	MTUS1	mitochondrial tumor suppressor 1	0	0	1	1	0	0	0	1	0	1	0
hsa-miR-181a	MIMAT0000256	NM_001002759	C10orf78	chromosome 10 open reading frame 78	0	0	0	0	0	0	1	1	0	1	1
hsa-miR-181a	MIMAT0000256	NM_001002843	ZNF280D	zinc finger protein 280D	0	0	1	0	0	0	1	1	0	1	0
hsa-miR-181a	MIMAT0000256	NM_001002844	ZNF280D	zinc finger protein 280D	0	0	1	1	0	0	0	1	0	1	0
hsa-miR-181a	MIMAT0000256	NM_001002926	TWISTNB	TWIST neighbor	0	0	1	1	0	0	0	1	0	1	0
hsa-miR-181a	MIMAT0000256	NM_001003927	EVI2A	ecotropic viral integration site 2A	0	0	1	1	0	0	0	1	0	1	0
hsa-miR-181a	MIMAT0000256	NM_001004127	ALG11	asparagine-linked glycosylation 11 homolog (S. cerevisiae, alpha-1,2-mannosyltransferase)	0	0	1	1	0	0	0	1	0	1	0
hsa-miR-181a	MIMAT0000256	NM_001005242	PKP2	plakophilin 2	0	0	1	1	0	0	0	1	0	1	0
hsa-miR-181a	MIMAT0000256	NM_001006642	SLC25A25	solute carrier family 25 (mitochondrial carrier; phosphate carrier), member 25	0	0	1	1	0	0	0	1	0	1	0
hsa-miR-181a	MIMAT0000256	NM_001006643	SLC25A25	solute carrier family 25 (mitochondrial carrier; phosphate carrier), member 25	0	0	1	1	0	0	0	1	0	1	0
hsa-miR-181a	MIMAT0000256	NM_001007094	ZNF37A	zinc finger protein 37A	0	0	1	1	0	0	0	1	0	1	0
hsa-miR-181a	MIMAT0000256	NM_001007225	IGF2BP2	insulin-like growth factor 2 mRNA binding protein 2	0	0	0	1	0	0	0	1	0	1	1
hsa-miR-181a	MIMAT0000256	NM_001007246	BRWD1	bromodomain and WD repeat domain containing 1	0	0	1	1	0	0	0	1	0	1	0
hsa-miR-181a	MIMAT0000256	NM_001007278	TRIM13	tripartite motif-containing 13	0	0	1	0	0	0	0	1	0	1	1
hsa-miR-181a	MIMAT0000256	NM_001007466	TULP4	tubby like protein 4	0	0	1	0	0	0	0	1	0	1	1
hsa-miR-181a	MIMAT0000256	NM_001007527	LMBRD2	LMBR1 domain containing 2	0	0	0	1	0	0	0	1	0	1	1
hsa-miR-181a	MIMAT0000256	NM_001008390	CGGBP1	CGG triplet repeat binding protein 1	0	0	1	0	0	0	0	1	0	1	1
hsa-miR-181a	MIMAT0000256	NM_001008495	TMEM64	transmembrane protein 64	0	0	1	1	0	0	0	1	0	1	0
hsa-miR-181a	MIMAT0000256	NM_001008539	SLC7A2	solute carrier family 7 (cationic amino acid transporter, y+ system), member 2	0	0	1	1	0	0	0	1	0	1	0
hsa-miR-181a	MIMAT0000256	NM_001008738	FNIP1	folliculin interacting protein 1	0	0	1	1	0	0	0	1	0	1	0
hsa-miR-181a	MIMAT0000256	NM_001009569	MLLT10	myeloid/lymphoid or mixed-lineage leukemia (trithorax homolog, Drosophila); translocated to, 10	0	0	1	1	0	0	0	1	0	1	0
hsa-miR-181a	MIMAT0000256	NM_001009894	C12orf29	chromosome 12 open reading frame 29	0	0	1	1	0	0	0	1	0	1	0
hsa-miR-181a	MIMAT0000256	NM_001010846	SHE	Src homology 2 domain containing E	0	0	1	1	0	0	0	1	0	1	0
hsa-miR-181a	MIMAT0000256	NM_001010891	MTX3	metaxin 3	0	0	1	1	0	0	0	1	0	1	0
hsa-miR-181a	MIMAT0000256	NM_001011549	MAGEA4	melanoma antigen family A, 4	0	0	1	1	0	0	0	1	0	1	0
hsa-miR-181a	MIMAT0000256	NM_001011666	CREB5	cAMP responsive element binding protein 5	0	0	1	1	0	0	0	1	0	1	0
hsa-miR-181a	MIMAT0000256	NM_001011667	CHCHD7	coiled-coil-helix-coiled-coil-helix domain containing 7	0	0	1	1	0	0	0	1	0	1	0
hsa-miR-181a	MIMAT0000256	NM_001011670	CHCHD7	coiled-coil-helix-coiled-coil-helix domain containing 7	0	0	1	1	0	0	0	1	0	1	0
hsa-miR-181a	MIMAT0000256	NM_001012320	ZNF302	zinc finger protein 302	0	0	1	0	0	0	0	1	0	1	1
hsa-miR-181a	MIMAT0000256	NM_001012420	GOLGA8G	golgi autoantigen, golgin subfamily a, 8G	0	0	1	1	0	0	0	0	0	1	1
hsa-miR-181a	MIMAT0000256	NM_001012751	ABI1	abl-interactor 1	0	0	1	1	0	0	0	1	0	1	0
hsa-miR-181a	MIMAT0000256	NM_001012752	ABI1	abl-interactor 1	0	0	1	1	0	0	0	1	0	1	0
hsa-miR-181a	MIMAT0000256	NM_001012961	C1orf84	chromosome 1 open reading frame 84	0	0	1	1	0	0	0	1	0	1	0
hsa-miR-181a	MIMAT0000256	NM_001013642	LOC388610	hypothetical LOC388610	0	0	1	1	0	0	0	1	0	1	0
hsa-miR-181a	MIMAT0000256	NM_001013691	ZNF833	zinc finger protein 833	0	0	1	1	0	0	0	1	0	1	0
hsa-miR-181a	MIMAT0000256	NM_001014797	KCNMA1	potassium large conductance calcium-activated channel, subfamily M, alpha member 1	0	0	1	0	0	0	0	1	0	1	1
hsa-miR-181a	MIMAT0000256	NM_001015887	IGSF11	immunoglobulin superfamily, member 11	0	0	0	1	0	0	0	1	0	1	1
hsa-miR-181a	MIMAT0000256	NM_001017420	ESCO2	establishment of cohesion 1 homolog 2 (S. cerevisiae)	0	0	1	1	0	0	0	1	0	1	0
hsa-miR-181a	MIMAT0000256	NM_001018058	TFEC	transcription factor EC	0	0	1	1	0	0	0	1	0	1	0
hsa-miR-181a	MIMAT0000256	NM_001018074	NR3C1	nuclear receptor subfamily 3, group C, member 1 (glucocorticoid receptor)	0	0	1	1	0	0	0	1	0	1	0
hsa-miR-181a	MIMAT0000256	NM_001018075	NR3C1	nuclear receptor subfamily 3, group C, member 1 (glucocorticoid receptor)	0	0	1	1	0	0	0	1	0	1	0
hsa-miR-181a	MIMAT0000256	NM_001018076	NR3C1	nuclear receptor subfamily 3, group C, member 1 (glucocorticoid receptor)	0	0	1	1	0	0	0	1	0	1	0
hsa-miR-181a	MIMAT0000256	NM_001018077	NR3C1	nuclear receptor subfamily 3, group C, member 1 (glucocorticoid receptor)	0	0	1	1	0	0	0	1	0	1	0
hsa-miR-181a	MIMAT0000256	NM_001018111	PODXL	podocalyxin-like	0	0	1	0	0	0	0	1	0	1	1
hsa-miR-181a	MIMAT0000256	NM_001020658	PUM1	pumilio homolog 1 (Drosophila)	0	0	1	0	0	0	0	1	0	1	1
hsa-miR-181a	MIMAT0000256	NM_001023567	GOLGA8B	golgi autoantigen, golgin subfamily a, 8B	0	0	1	0	0	0	0	1	0	1	1
hsa-miR-181a	MIMAT0000256	NM_001024094	NR3C1	nuclear receptor subfamily 3, group C, member 1 (glucocorticoid receptor)	0	0	1	1	0	0	0	1	0	1	0
hsa-miR-181a	MIMAT0000256	NM_001024647	RAB3IP	RAB3A interacting protein (rabin3)	0	0	1	1	0	0	0	1	0	1	0
hsa-miR-181a	MIMAT0000256	NM_001024937	MINK1	misshapen-like kinase 1 (zebrafish)	0	0	1	0	0	0	0	1	0	1	1
hsa-miR-181a	MIMAT0000256	NM_001025247	TAF5L	TAF5-like RNA polymerase II, p300/CBP-associated factor (PCAF)-associated factor, 65kDa	0	0	1	1	0	0	0	1	0	1	0
hsa-miR-181a	MIMAT0000256	NM_001029866	CCT8L1	chaperonin containing TCP1, subunit 8 (theta)-like 1	0	0	1	1	0	0	0	1	0	1	0
hsa-miR-181a	MIMAT0000256	NM_001031726	C19orf12	chromosome 19 open reading frame 12	0	0	1	1	0	0	0	1	0	1	0
hsa-miR-181a	MIMAT0000256	NM_001031812	CSNK1G3	casein kinase 1, gamma 3	0	0	1	0	0	0	0	1	0	1	1
hsa-miR-181a	MIMAT0000256	NM_001032999	CBFA2T2	core-binding factor, runt domain, alpha subunit 2; translocated to, 2	0	0	1	0	0	0	0	1	0	1	1
hsa-miR-181a	MIMAT0000256	NM_001033605	BBS9	Bardet-Biedl syndrome 9	0	0	1	1	0	0	0	1	0	1	0
hsa-miR-181a	MIMAT0000256	NM_001035256	POMC	proopiomelanocortin (adrenocorticotropin/ beta-lipotropin/ alpha-melanocyte stimulating hormone/ beta-melanocyte stimulating hormone/ beta-endorphin)	0	0	1	1	0	0	0	1	0	1	0
hsa-miR-181a	MIMAT0000256	NM_001036	RYR3	ryanodine receptor 3	0	0	1	1	0	0	0	1	0	1	0
hsa-miR-181a	MIMAT0000256	NM_001037174	ARL5A	ADP-ribosylation factor-like 5A	0	0	0	1	0	0	0	1	0	1	1
hsa-miR-181a	MIMAT0000256	NM_001039362	ATP6V1C2	ATPase, H+ transporting, lysosomal 42kDa, V1 subunit C2	0	0	1	1	0	0	0	1	0	1	0
hsa-miR-181a	MIMAT0000256	NM_001039577	CCNL2	cyclin L2	0	0	1	1	0	0	0	1	0	1	0
hsa-miR-181a	MIMAT0000256	NM_001039590	USP9X	ubiquitin specific peptidase 9, X-linked	0	0	1	1	0	0	0	1	0	1	0
hsa-miR-181a	MIMAT0000256	NM_001039591	USP9X	ubiquitin specific peptidase 9, X-linked	0	0	1	1	0	0	0	1	0	1	0
hsa-miR-181a	MIMAT0000256	NM_001039840	CHIC1	cysteine-rich hydrophobic domain 1	0	0	1	0	0	0	0	1	0	1	1
hsa-miR-181a	MIMAT0000256	NM_001039960	SLC4A8	solute carrier family 4, sodium bicarbonate cotransporter, member 8	0	0	1	1	0	0	0	1	0	1	0
hsa-miR-181a	MIMAT0000256	NM_001040006	TCERG1	transcription elongation regulator 1	0	0	0	1	0	0	0	1	0	1	1
hsa-miR-181a	MIMAT0000256	NM_001040020	FAM3C	family with sequence similarity 3, member C	0	0	0	1	0	0	0	1	0	1	1
hsa-miR-181a	MIMAT0000256	NM_001040058	SPP1	secreted phosphoprotein 1 (osteopontin, bone sialoprotein I, early T-lymphocyte activation 1)	0	0	1	1	0	0	0	1	0	1	0
hsa-miR-181a	MIMAT0000256	NM_001040633	PRKAG2	protein kinase, AMP-activated, gamma 2 non-catalytic subunit	0	0	1	0	0	0	0	1	0	1	1
hsa-miR-181a	MIMAT0000256	NM_001040649	ACP1	acid phosphatase 1, soluble	0	0	1	1	0	0	0	1	0	1	0
hsa-miR-181a	MIMAT0000256	NM_001040709	SYPL2	synaptophysin-like 2	0	0	1	0	0	0	0	1	0	1	1
hsa-miR-181a	MIMAT0000256	NM_001042413	GLIS3	GLIS family zinc finger 3	0	0	1	0	0	0	0	1	0	1	1
hsa-miR-181a	MIMAT0000256	NM_001042533	MINA	MYC induced nuclear antigen	0	0	1	1	0	0	0	1	0	1	0
hsa-miR-181a	MIMAT0000256	NM_001042583	CD1E	CD1e molecule	0	0	1	1	0	0	0	1	0	1	0
hsa-miR-181a	MIMAT0000256	NM_001042584	CD1E	CD1e molecule	0	0	1	1	0	0	0	1	0	1	0
hsa-miR-181a	MIMAT0000256	NM_001042585	CD1E	CD1e molecule	0	0	1	1	0	0	0	1	0	1	0
hsa-miR-181a	MIMAT0000256	NM_001042587	CD1E	CD1e molecule	0	0	1	1	0	0	0	1	0	1	0
hsa-miR-181a	MIMAT0000256	NM_001042603	JARID1A	jumonji, AT rich interactive domain 1A	0	0	1	1	0	0	0	1	0	1	0
hsa-miR-181a	MIMAT0000256	NM_001042646	TRAK1	trafficking protein, kinesin binding 1	0	0	1	1	0	0	0	1	0	1	0
hsa-miR-181a	MIMAT0000256	NM_001045556	SLA	Src-like-adaptor	0	0	1	1	0	0	0	1	0	1	0
hsa-miR-181a	MIMAT0000256	NM_001060	TBXA2R	thromboxane A2 receptor	0	0	1	1	0	0	0	1	0	1	0
hsa-miR-181a	MIMAT0000256	NM_001076675	ZNF626	zinc finger protein 626	0	0	1	1	0	0	0	1	0	1	0
hsa-miR-181a	MIMAT0000256	NM_001077181	CDC14B	CDC14 cell division cycle 14 homolog B (S. cerevisiae)	0	0	1	1	0	0	0	1	0	1	0
hsa-miR-181a	MIMAT0000256	NM_001077426	ZNF586	zinc finger protein 586	0	0	1	1	0	0	0	1	0	1	0
hsa-miR-181a	MIMAT0000256	NM_001077440	BCLAF1	BCL2-associated transcription factor 1	0	0	1	0	0	0	0	1	0	1	1
hsa-miR-181a	MIMAT0000256	NM_001077657	C3orf43	chromosome 3 open reading frame 43	0	0	1	1	0	0	0	1	0	1	0
hsa-miR-181a	MIMAT0000256	NM_001077690	ALG9	asparagine-linked glycosylation 9 homolog (S. cerevisiae, alpha- 1,2-mannosyltransferase)	0	0	1	1	0	0	0	1	0	1	0
hsa-miR-181a	MIMAT0000256	NM_001077691	ALG9	asparagine-linked glycosylation 9 homolog (S. cerevisiae, alpha- 1,2-mannosyltransferase)	0	0	1	1	0	0	0	1	0	1	0
hsa-miR-181a	MIMAT0000256	NM_001079673	FNDC3A	fibronectin type III domain containing 3A	0	0	1	0	0	0	0	1	0	1	1
hsa-miR-181a	MIMAT0000256	NM_001079840	OCIAD1	OCIA domain containing 1	0	0	1	1	0	0	0	1	0	1	0
hsa-miR-181a	MIMAT0000256	NM_001080416	MYBL1	v-myb myeloblastosis viral oncogene homolog (avian)-like 1	0	0	1	0	0	0	0	1	0	1	1
hsa-miR-181a	MIMAT0000256	NM_001080433	CCDC85A	coiled-coil domain containing 85A	0	0	1	0	0	0	0	1	0	1	1
hsa-miR-181a	MIMAT0000256	NM_001080435	WHDC1	WAS protein homology region 2 domain containing 1	0	0	1	1	0	0	0	1	0	1	0
hsa-miR-181a	MIMAT0000256	NM_001080470	ZNF697	zinc finger protein 697	0	0	1	0	0	0	0	1	0	1	1
hsa-miR-181a	MIMAT0000256	NM_001080480	MBOAT1	membrane bound O-acyltransferase domain containing 1	0	0	1	0	0	0	0	1	0	1	1
hsa-miR-181a	MIMAT0000256	NM_001080779	MYO1C	myosin IC	0	0	1	0	0	0	0	1	0	1	1
hsa-miR-181a	MIMAT0000256	NM_001080975	REPS2	RALBP1 associated Eps domain containing 2	0	0	1	1	0	0	0	1	0	1	0
hsa-miR-181a	MIMAT0000256	NM_001083	PDE5A	phosphodiesterase 5A, cGMP-specific	0	0	1	1	0	0	0	1	0	1	0
hsa-miR-181a	MIMAT0000256	NM_001112	ADARB1	adenosine deaminase, RNA-specific, B1 (RED1 homolog rat)	0	0	1	1	0	0	0	1	0	1	0
hsa-miR-181a	MIMAT0000256	NM_001151	SLC25A4	solute carrier family 25 (mitochondrial carrier; adenine nucleotide translocator), member 4	0	0	1	1	0	0	0	1	0	1	0
hsa-miR-181a	MIMAT0000256	NM_001230	CASP10	caspase 10, apoptosis-related cysteine peptidase	0	0	1	0	0	0	1	1	0	1	0
hsa-miR-181a	MIMAT0000256	NM_001349	DARS	aspartyl-tRNA synthetase	0	0	1	1	0	0	0	1	0	1	0
hsa-miR-181a	MIMAT0000256	NM_001400	S1PR1	sphingosine-1-phosphate receptor 1	0	0	0	1	0	0	0	1	0	1	1
hsa-miR-181a	MIMAT0000256	NM_001432	EREG	epiregulin	0	0	1	1	0	0	0	1	0	1	0
hsa-miR-181a	MIMAT0000256	NM_001511	CXCL1	chemokine (C-X-C motif) ligand 1 (melanoma growth stimulating activity, alpha)	0	0	1	1	0	0	0	1	0	1	0
hsa-miR-181a	MIMAT0000256	NM_001546	ID4	inhibitor of DNA binding 4, dominant negative helix-loop-helix protein	0	0	1	0	0	0	1	1	0	1	0
hsa-miR-181a	MIMAT0000256	NM_001678	ATP1B2	ATPase, Na+/K+ transporting, beta 2 polypeptide	0	0	1	1	0	0	0	1	0	1	0
hsa-miR-181a	MIMAT0000256	NM_001701	BAAT	bile acid Coenzyme A: amino acid N-acyltransferase (glycine N-choloyltransferase)	0	0	1	0	0	0	0	1	0	1	1
hsa-miR-181a	MIMAT0000256	NM_001706	BCL6	B-cell CLL/lymphoma 6 (zinc finger protein 51)	0	0	0	0	0	0	1	1	0	1	1
hsa-miR-181a	MIMAT0000256	NM_001742	CALCR	calcitonin receptor	0	0	1	1	0	0	0	1	0	1	0
hsa-miR-181a	MIMAT0000256	NM_001778	CD48	CD48 molecule	0	0	1	1	0	0	0	1	0	1	0
hsa-miR-181a	MIMAT0000256	NM_001806	CEBPG	CCAAT/enhancer binding protein (C/EBP), gamma	0	0	1	1	0	0	0	1	0	1	0
hsa-miR-181a	MIMAT0000256	NM_001858	COL19A1	collagen, type XIX, alpha 1	0	0	1	1	0	0	0	1	0	1	0
hsa-miR-181a	MIMAT0000256	NM_001903	CTNNA1	catenin (cadherin-associated protein), alpha 1, 102kDa	0	0	1	1	0	0	0	1	0	1	0
hsa-miR-181a	MIMAT0000256	NM_001941	DSC3	desmocollin 3	0	0	1	1	0	0	0	1	0	1	0
hsa-miR-181a	MIMAT0000256	NM_001981	EPS15	epidermal growth factor receptor pathway substrate 15	0	0	1	0	0	0	0	1	0	1	1
hsa-miR-181a	MIMAT0000256	NM_001992	F2R	coagulation factor II (thrombin) receptor	0	0	1	1	0	0	0	1	0	1	0
hsa-miR-181a	MIMAT0000256	NM_002025	AFF2	AF4/FMR2 family, member 2	0	0	1	1	0	0	0	1	0	1	0
hsa-miR-181a	MIMAT0000256	NM_002089	CXCL2	chemokine (C-X-C motif) ligand 2	0	0	1	1	0	0	0	1	0	1	0
hsa-miR-181a	MIMAT0000256	NM_002099	GYPA	glycophorin A (MNS blood group)	0	0	1	1	0	0	0	1	0	1	0
hsa-miR-181a	MIMAT0000256	NM_002128	HMGB1	high-mobility group box 1	0	0	1	0	0	0	0	1	0	1	1
hsa-miR-181a	MIMAT0000256	NM_002129	HMGB2	high-mobility group box 2	0	0	0	1	0	0	0	1	0	1	1
hsa-miR-181a	MIMAT0000256	NM_002203	ITGA2	integrin, alpha 2 (CD49B, alpha 2 subunit of VLA-2 receptor)	0	0	1	1	0	0	0	1	0	1	0
hsa-miR-181a	MIMAT0000256	NM_002268	KPNA4	karyopherin alpha 4 (importin alpha 3)	0	0	1	1	0	0	0	1	0	1	0
hsa-miR-181a	MIMAT0000256	NM_002270	TNPO1	transportin 1	0	0	1	0	0	0	0	1	0	1	1
hsa-miR-181a	MIMAT0000256	NM_002271	IPO5	importin 5	0	0	0	1	0	0	0	1	0	1	1
hsa-miR-181a	MIMAT0000256	NM_002309	LIF	leukemia inhibitory factor (cholinergic differentiation factor)	0	0	1	0	0	0	0	1	0	1	1
hsa-miR-181a	MIMAT0000256	NM_002310	LIFR	leukemia inhibitory factor receptor alpha	0	0	1	1	0	0	0	1	0	1	0
hsa-miR-181a	MIMAT0000256	NM_002315	LMO1	LIM domain only 1 (rhombotin 1)	0	0	0	0	0	0	1	1	0	1	1
hsa-miR-181a	MIMAT0000256	NM_002334	LRP4	low density lipoprotein receptor-related protein 4	0	0	1	0	0	0	0	1	0	1	1
hsa-miR-181a	MIMAT0000256	NM_002373	MAP1A	microtubule-associated protein 1A	0	0	0	0	0	0	1	1	0	1	1
hsa-miR-181a	MIMAT0000256	NM_002381	MATN3	matrilin 3	0	0	1	1	0	0	0	1	0	1	0
hsa-miR-181a	MIMAT0000256	NM_002610	PDK1	pyruvate dehydrogenase kinase, isozyme 1	0	0	1	1	0	0	0	1	0	1	0
hsa-miR-181a	MIMAT0000256	NM_002618	PEX13	peroxisome biogenesis factor 13	0	0	1	1	0	0	0	1	0	1	0
hsa-miR-181a	MIMAT0000256	NM_002662	PLD1	phospholipase D1, phosphatidylcholine-specific	0	0	1	1	0	0	0	1	0	1	0
hsa-miR-181a	MIMAT0000256	NM_002778	PSAP	prosaposin (variant Gaucher disease and variant metachromatic leukodystrophy)	0	0	1	0	0	0	1	1	0	1	0
hsa-miR-181a	MIMAT0000256	NM_002784	PSG9	pregnancy specific beta-1-glycoprotein 9	0	0	1	1	0	0	0	1	0	1	0
hsa-miR-181a	MIMAT0000256	NM_002942	ROBO2	roundabout, axon guidance receptor, homolog 2 (Drosophila)	0	0	0	1	0	0	0	1	0	1	1
hsa-miR-181a	MIMAT0000256	NM_003010	MAP2K4	mitogen-activated protein kinase kinase 4	0	0	1	1	0	0	0	1	0	1	0
hsa-miR-181a	MIMAT0000256	NM_003014	SFRP4	secreted frizzled-related protein 4	0	0	1	1	0	0	0	1	0	1	0
hsa-miR-181a	MIMAT0000256	NM_003046	SLC7A2	solute carrier family 7 (cationic amino acid transporter, y+ system), member 2	0	0	1	1	0	0	0	1	0	1	0
hsa-miR-181a	MIMAT0000256	NM_003142	SSB	Sjogren syndrome antigen B (autoantigen La)	0	0	1	1	0	0	0	1	0	1	0
hsa-miR-181a	MIMAT0000256	NM_003234	TFRC	transferrin receptor (p90, CD71)	0	0	1	1	0	0	0	1	0	1	0
hsa-miR-181a	MIMAT0000256	NM_003338	UBE2D1	ubiquitin-conjugating enzyme E2D 1 (UBC4/5 homolog, yeast)	0	0	1	1	0	0	0	1	0	1	0
hsa-miR-181a	MIMAT0000256	NM_003372	VBP1	von Hippel-Lindau binding protein 1	0	0	1	1	0	0	0	1	0	1	0
hsa-miR-181a	MIMAT0000256	NM_003421	ZNF37A	zinc finger protein 37A	0	0	1	1	0	0	0	1	0	1	0
hsa-miR-181a	MIMAT0000256	NM_003431	ZNF124	zinc finger protein 124	0	0	1	1	0	0	0	1	0	1	0
hsa-miR-181a	MIMAT0000256	NM_003437	ZNF136	zinc finger protein 136	0	0	1	1	0	0	0	1	0	1	0
hsa-miR-181a	MIMAT0000256	NM_003440	ZNF140	zinc finger protein 140	0	0	1	1	0	0	0	1	0	1	0
hsa-miR-181a	MIMAT0000256	NM_003472	DEK	DEK oncogene (DNA binding)	0	0	1	0	0	0	0	1	0	1	1
hsa-miR-181a	MIMAT0000256	NM_003478	CUL5	cullin 5	0	0	1	0	0	0	0	1	0	1	1
hsa-miR-181a	MIMAT0000256	NM_003580	NSMAF	neutral sphingomyelinase (N-SMase) activation associated factor	0	0	0	0	0	0	1	1	0	1	1
hsa-miR-181a	MIMAT0000256	NM_003617	RGS5	regulator of G-protein signaling 5	0	0	1	1	0	0	0	1	0	1	0
hsa-miR-181a	MIMAT0000256	NM_003626	PPFIA1	protein tyrosine phosphatase, receptor type, f polypeptide (PTPRF), interacting protein (liprin), alpha 1	0	0	0	1	0	0	0	1	0	1	1
hsa-miR-181a	MIMAT0000256	NM_003671	CDC14B	CDC14 cell division cycle 14 homolog B (S. cerevisiae)	0	0	1	1	0	0	0	1	0	1	0
hsa-miR-181a	MIMAT0000256	NM_003701	TNFSF11	tumor necrosis factor (ligand) superfamily, member 11	0	0	0	0	0	0	1	1	0	1	1
hsa-miR-181a	MIMAT0000256	NM_003715	USO1	USO1 homolog, vesicle docking protein (yeast)	0	0	1	1	0	0	0	1	0	1	0
hsa-miR-181a	MIMAT0000256	NM_003722	TP63	tumor protein p63	0	0	1	1	0	0	0	1	0	1	0
hsa-miR-181a	MIMAT0000256	NM_003774	GALNT4	UDP-N-acetyl-alpha-D-galactosamine:polypeptide N-acetylgalactosaminyltransferase 4 (GalNAc-T4)	0	0	1	1	0	0	0	1	0	1	0
hsa-miR-181a	MIMAT0000256	NM_003842	TNFRSF10B	tumor necrosis factor receptor superfamily, member 10b	0	0	1	1	0	0	0	1	0	1	0
hsa-miR-181a	MIMAT0000256	NM_003848	SUCLG2	succinate-CoA ligase, GDP-forming, beta subunit	0	0	1	1	0	0	0	1	0	1	0
hsa-miR-181a	MIMAT0000256	NM_003858	CCNK	cyclin K	0	0	0	0	0	0	1	1	0	1	1
hsa-miR-181a	MIMAT0000256	NM_003947	KALRN	kalirin, RhoGEF kinase	0	0	1	1	0	0	0	1	0	1	0
hsa-miR-181a	MIMAT0000256	NM_003948	CDKL2	cyclin-dependent kinase-like 2 (CDC2-related kinase)	0	0	1	0	0	0	0	1	0	1	1
hsa-miR-181a	MIMAT0000256	NM_003958	RNF8	ring finger protein 8	0	0	1	1	0	0	0	1	0	1	0
hsa-miR-181a	MIMAT0000256	NM_003994	KITLG	KIT ligand	0	0	1	1	0	0	0	1	0	1	0
hsa-miR-181a	MIMAT0000256	NM_004257	TGFBRAP1	transforming growth factor, beta receptor associated protein 1	0	0	1	1	0	0	0	1	0	1	0
hsa-miR-181a	MIMAT0000256	NM_004282	BAG2	BCL2-associated athanogene 2	0	0	1	1	0	0	0	1	0	1	0
hsa-miR-181a	MIMAT0000256	NM_004293	GDA	guanine deaminase	0	0	1	1	0	0	0	1	0	1	0
hsa-miR-181a	MIMAT0000256	NM_004311	ARL3	ADP-ribosylation factor-like 3	0	0	1	0	0	0	0	1	0	1	1
hsa-miR-181a	MIMAT0000256	NM_004412	TRDMT1	tRNA aspartic acid methyltransferase 1	0	0	1	1	0	0	0	1	0	1	0
hsa-miR-181a	MIMAT0000256	NM_004447	EPS8	epidermal growth factor receptor pathway substrate 8	0	0	1	0	0	0	1	1	0	1	0
hsa-miR-181a	MIMAT0000256	NM_004598	SPOCK1	sparc/osteonectin, cwcv and kazal-like domains proteoglycan (testican) 1	0	0	1	1	0	0	0	1	0	1	0
hsa-miR-181a	MIMAT0000256	NM_004641	MLLT10	myeloid/lymphoid or mixed-lineage leukemia (trithorax homolog, Drosophila); translocated to, 10	0	0	1	1	0	0	0	1	0	1	0
hsa-miR-181a	MIMAT0000256	NM_004654	USP9Y	ubiquitin specific peptidase 9, Y-linked (fat facets-like, Drosophila)	0	0	1	1	0	0	0	1	0	1	0
hsa-miR-181a	MIMAT0000256	NM_004660	DDX3Y	DEAD (Asp-Glu-Ala-Asp) box polypeptide 3, Y-linked	0	0	1	1	0	0	0	1	0	1	0
hsa-miR-181a	MIMAT0000256	NM_004675	DIRAS3	DIRAS family, GTP-binding RAS-like 3	0	0	1	1	0	0	0	1	0	1	0
hsa-miR-181a	MIMAT0000256	NM_004726	REPS2	RALBP1 associated Eps domain containing 2	0	0	1	1	0	0	0	1	0	1	0
hsa-miR-181a	MIMAT0000256	NM_004727	SLC24A1	solute carrier family 24 (sodium/potassium/calcium exchanger), member 1	0	0	1	1	0	0	0	1	0	1	0
hsa-miR-181a	MIMAT0000256	NM_004734	DCLK1	doublecortin-like kinase 1	0	0	0	1	0	0	1	1	0	1	0
hsa-miR-181a	MIMAT0000256	NM_004798	KIF3B	kinesin family member 3B	0	0	1	0	0	0	0	1	0	1	1
hsa-miR-181a	MIMAT0000256	NM_004831	MED26	mediator complex subunit 26	0	0	1	0	0	0	0	1	0	1	1
hsa-miR-181a	MIMAT0000256	NM_004852	ONECUT2	one cut homeobox 2	0	0	0	1	0	0	0	1	0	1	1
hsa-miR-181a	MIMAT0000256	NM_004884	PUNC	putative neuronal cell adhesion molecule	0	0	1	0	0	0	0	1	0	1	1
hsa-miR-181a	MIMAT0000256	NM_004898	CLOCK	clock homolog (mouse)	0	0	1	0	0	0	1	1	0	1	0
hsa-miR-181a	MIMAT0000256	NM_004904	CREB5	cAMP responsive element binding protein 5	0	0	1	1	0	0	0	1	0	1	0
hsa-miR-181a	MIMAT0000256	NM_004912	KRIT1	KRIT1, ankyrin repeat containing	0	0	1	1	0	0	0	1	0	1	0
hsa-miR-181a	MIMAT0000256	NM_004929	CALB1	calbindin 1, 28kDa	0	0	1	1	0	0	0	1	0	1	0
hsa-miR-181a	MIMAT0000256	NM_004985	KRAS	v-Ki-ras2 Kirsten rat sarcoma viral oncogene homolog	0	0	0	1	0	0	1	1	0	1	0
hsa-miR-181a	MIMAT0000256	NM_004993	ATXN3	ataxin 3	0	0	1	1	0	0	0	1	0	1	0
hsa-miR-181a	MIMAT0000256	NM_005032	PLS3	plastin 3 (T isoform)	0	0	1	0	0	0	0	1	0	1	1
hsa-miR-181a	MIMAT0000256	NM_005036	PPARA	peroxisome proliferator-activated receptor alpha	0	0	1	1	0	0	0	1	0	1	0
hsa-miR-181a	MIMAT0000256	NM_005042	PRH2	proline-rich protein HaeIII subfamily 2	0	0	1	1	0	0	0	1	0	1	0
hsa-miR-181a	MIMAT0000256	NM_005063	SCD	stearoyl-CoA desaturase (delta-9-desaturase)	0	0	1	1	0	0	0	1	0	1	0
hsa-miR-181a	MIMAT0000256	NM_005093	CBFA2T2	core-binding factor, runt domain, alpha subunit 2; translocated to, 2	0	0	1	0	0	0	1	1	0	1	0
hsa-miR-181a	MIMAT0000256	NM_005192	CDKN3	cyclin-dependent kinase inhibitor 3 (CDK2-associated dual specificity phosphatase)	0	0	1	1	0	0	0	1	0	1	0
hsa-miR-181a	MIMAT0000256	NM_005204	MAP3K8	mitogen-activated protein kinase kinase kinase 8	0	0	1	1	0	0	0	1	0	1	0
hsa-miR-181a	MIMAT0000256	NM_005311	GRB10	growth factor receptor-bound protein 10	0	0	1	1	0	0	0	1	0	1	0
hsa-miR-181a	MIMAT0000256	NM_005392	PHF2	PHD finger protein 2	0	0	1	0	0	0	0	1	0	1	1
hsa-miR-181a	MIMAT0000256	NM_005398	PPP1R3C	protein phosphatase 1, regulatory (inhibitor) subunit 3C	0	0	1	1	0	0	0	1	0	1	0
hsa-miR-181a	MIMAT0000256	NM_005402	RALA	v-ral simian leukemia viral oncogene homolog A (ras related)	0	0	1	0	0	0	0	1	0	1	1
hsa-miR-181a	MIMAT0000256	NM_005465	AKT3	v-akt murine thymoma viral oncogene homolog 3 (protein kinase B, gamma)	0	0	0	0	0	0	1	1	0	1	1
hsa-miR-181a	MIMAT0000256	NM_005470	ABI1	abl-interactor 1	0	0	1	1	0	0	0	1	0	1	0
hsa-miR-181a	MIMAT0000256	NM_005475	SH2B3	SH2B adaptor protein 3	0	0	1	1	0	0	0	1	0	1	0
hsa-miR-181a	MIMAT0000256	NM_005501	ITGA3	integrin, alpha 3 (antigen CD49C, alpha 3 subunit of VLA-3 receptor)	0	0	0	1	0	0	1	1	0	1	0
hsa-miR-181a	MIMAT0000256	NM_005570	LMAN1	lectin, mannose-binding, 1	0	0	1	1	0	0	0	1	0	1	0
hsa-miR-181a	MIMAT0000256	NM_005656	TMPRSS2	transmembrane protease, serine 2	0	0	1	1	0	0	0	1	0	1	0
hsa-miR-181a	MIMAT0000256	NM_005663	WHSC2	Wolf-Hirschhorn syndrome candidate 2	0	0	1	1	0	0	0	1	0	1	0
hsa-miR-181a	MIMAT0000256	NM_005752	CLEC3A	C-type lectin domain family 3, member A	0	0	1	1	0	0	0	1	0	1	0
hsa-miR-181a	MIMAT0000256	NM_005832	KCNMB2	potassium large conductance calcium-activated channel, subfamily M, beta member 2	0	0	1	1	0	0	0	1	0	1	0
hsa-miR-181a	MIMAT0000256	NM_005862	STAG1	stromal antigen 1	0	0	1	0	0	0	0	1	0	1	1
hsa-miR-181a	MIMAT0000256	NM_005865	PRSS16	protease, serine, 16 (thymus)	0	0	1	1	0	0	0	1	0	1	0
hsa-miR-181a	MIMAT0000256	NM_005884	PAK4	p21 protein (Cdc42/Rac)-activated kinase 4	0	0	1	0	0	0	1	1	0	1	0
hsa-miR-181a	MIMAT0000256	NM_005910	MAPT	microtubule-associated protein tau	0	0	1	0	0	0	0	1	0	1	1
hsa-miR-181a	MIMAT0000256	NM_005935	AFF1	AF4/FMR2 family, member 1	0	0	0	0	0	0	1	1	0	1	1
hsa-miR-181a	MIMAT0000256	NM_005955	MTF1	metal-regulatory transcription factor 1	0	0	1	0	0	0	0	1	0	1	1
hsa-miR-181a	MIMAT0000256	NM_005977	RNF6	ring finger protein (C3H2C3 type) 6	0	0	0	1	0	0	0	1	0	1	1
hsa-miR-181a	MIMAT0000256	NM_006007	ZFAND5	zinc finger, AN1-type domain 5	0	0	0	0	0	0	1	1	0	1	1
hsa-miR-181a	MIMAT0000256	NM_006029	PNMA1	paraneoplastic antigen MA1	0	0	1	1	0	0	0	1	0	1	0
hsa-miR-181a	MIMAT0000256	NM_006030	CACNA2D2	calcium channel, voltage-dependent, alpha 2/delta subunit 2	0	0	1	0	0	0	1	1	0	1	0
hsa-miR-181a	MIMAT0000256	NM_006183	NTS	neurotensin	0	0	1	1	0	0	0	1	0	1	0
hsa-miR-181a	MIMAT0000256	NM_006208	ENPP1	ectonucleotide pyrophosphatase/phosphodiesterase 1	0	0	1	1	0	0	0	1	0	1	0
hsa-miR-181a	MIMAT0000256	NM_006246	PPP2R5E	protein phosphatase 2, regulatory subunit B", epsilon isoform	0	0	1	1	0	0	0	1	0	1	0
hsa-miR-181a	MIMAT0000256	NM_006315	PCGF3	polycomb group ring finger 3	0	0	1	1	0	0	0	1	0	1	0
hsa-miR-181a	MIMAT0000256	NM_006335	TIMM17A	translocase of inner mitochondrial membrane 17 homolog A (yeast)	0	0	1	1	0	0	0	1	0	1	0
hsa-miR-181a	MIMAT0000256	NM_006379	SEMA3C	sema domain, immunoglobulin domain (Ig), short basic domain, secreted, (semaphorin) 3C	0	0	1	1	0	0	0	1	0	1	0
hsa-miR-181a	MIMAT0000256	NM_006393	NEBL	nebulette	0	0	1	1	0	0	0	1	0	1	0
hsa-miR-181a	MIMAT0000256	NM_006404	PROCR	protein C receptor, endothelial (EPCR)	0	0	1	1	0	0	0	1	0	1	0
hsa-miR-181a	MIMAT0000256	NM_006407	ARL6IP5	ADP-ribosylation-like factor 6 interacting protein 5	0	0	1	1	0	0	0	1	0	1	0
hsa-miR-181a	MIMAT0000256	NM_006409	ARPC1A	actin related protein 2/3 complex, subunit 1A, 41kDa	0	0	1	1	0	0	0	1	0	1	0
hsa-miR-181a	MIMAT0000256	NM_006411	AGPAT1	1-acylglycerol-3-phosphate O-acyltransferase 1 (lysophosphatidic acid acyltransferase, alpha)	0	0	1	0	0	0	1	0	0	1	1
hsa-miR-181a	MIMAT0000256	NM_006460	HEXIM1	hexamethylene bis-acetamide inducible 1	0	0	1	0	0	0	0	1	0	1	1
hsa-miR-181a	MIMAT0000256	NM_006467	POLR3G	polymerase (RNA) III (DNA directed) polypeptide G (32kD)	0	0	1	1	0	0	0	1	0	1	0
hsa-miR-181a	MIMAT0000256	NM_006489	NOVA1	neuro-oncological ventral antigen 1	0	0	0	1	0	0	1	1	0	1	0
hsa-miR-181a	MIMAT0000256	NM_006526	ZNF217	zinc finger protein 217	0	0	1	1	0	0	0	1	0	1	0
hsa-miR-181a	MIMAT0000256	NM_006544	EXOC5	exocyst complex component 5	0	0	1	1	0	0	0	1	0	1	0
hsa-miR-181a	MIMAT0000256	NM_006595	API5	apoptosis inhibitor 5	0	0	1	0	0	0	1	1	0	1	0
hsa-miR-181a	MIMAT0000256	NM_006706	TCERG1	transcription elongation regulator 1	0	0	0	1	0	0	1	1	0	1	0
hsa-miR-181a	MIMAT0000256	NM_006717	SPIN1	spindlin 1	0	0	1	1	0	0	0	1	0	1	0
hsa-miR-181a	MIMAT0000256	NM_006748	SLA	Src-like-adaptor	0	0	1	1	0	0	0	1	0	1	0
hsa-miR-181a	MIMAT0000256	NM_006793	PRDX3	peroxiredoxin 3	0	0	1	1	0	0	0	1	0	1	0
hsa-miR-181a	MIMAT0000256	NM_006822	RAB40B	RAB40B, member RAS oncogene family	0	0	1	1	0	0	0	1	0	1	0
hsa-miR-181a	MIMAT0000256	NM_006885	ZFHX3	zinc finger homeobox 3	0	0	1	0	0	0	0	1	0	1	1
hsa-miR-181a	MIMAT0000256	NM_006888	CALM1	calmodulin 1 (phosphorylase kinase, delta)	0	0	0	1	0	0	0	1	0	1	1
hsa-miR-181a	MIMAT0000256	NM_006898	HOXD3	homeobox D3	0	0	1	1	0	0	0	1	0	1	0
hsa-miR-181a	MIMAT0000256	NM_006933	SLC5A3	solute carrier family 5 (inositol transporters), member 3	0	0	1	1	0	0	0	1	0	1	0
hsa-miR-181a	MIMAT0000256	NM_006969	ZNF28	zinc finger protein 28	0	0	1	1	0	0	0	1	0	1	0
hsa-miR-181a	MIMAT0000256	NM_006988	ADAMTS1	ADAM metallopeptidase with thrombospondin type 1 motif, 1	0	0	0	0	0	0	1	1	0	1	1
hsa-miR-181a	MIMAT0000256	NM_006996	SLC19A2	solute carrier family 19 (thiamine transporter), member 2	0	0	1	1	0	0	0	1	0	1	0
hsa-miR-181a	MIMAT0000256	NM_007006	NUDT21	nudix (nucleoside diphosphate linked moiety X)-type motif 21	0	0	1	1	0	0	0	1	0	1	0
hsa-miR-181a	MIMAT0000256	NM_007010	DDX52	DEAD (Asp-Glu-Ala-Asp) box polypeptide 52	0	0	1	1	0	0	0	1	0	1	0
hsa-miR-181a	MIMAT0000256	NM_007023	RAPGEF4	Rap guanine nucleotide exchange factor (GEF) 4	0	0	1	1	0	0	0	1	0	1	0
hsa-miR-181a	MIMAT0000256	NM_007054	KIF3A	kinesin family member 3A	0	0	1	1	0	0	0	1	0	1	0
hsa-miR-181a	MIMAT0000256	NM_007114	TMF1	TATA element modulatory factor 1	0	0	1	1	0	0	0	1	0	1	0
hsa-miR-181a	MIMAT0000256	NM_007115	TNFAIP6	tumor necrosis factor, alpha-induced protein 6	0	0	1	1	0	0	0	1	0	1	0
hsa-miR-181a	MIMAT0000256	NM_007144	PCGF2	polycomb group ring finger 2	0	0	0	0	0	0	1	1	0	1	1
hsa-miR-181a	MIMAT0000256	NM_007166	PICALM	phosphatidylinositol binding clathrin assembly protein	0	0	1	1	0	0	0	1	0	1	0
hsa-miR-181a	MIMAT0000256	NM_007174	CIT	citron (rho-interacting, serine/threonine kinase 21)	0	0	1	0	0	0	0	1	0	1	1
hsa-miR-181a	MIMAT0000256	NM_007212	RNF2	ring finger protein 2	0	0	1	0	0	0	1	1	0	1	0
hsa-miR-181a	MIMAT0000256	NM_007220	CA5B	carbonic anhydrase VB, mitochondrial	0	0	1	1	0	0	0	1	0	1	0
hsa-miR-181a	MIMAT0000256	NM_007287	MME	membrane metallo-endopeptidase	0	0	1	1	0	0	0	1	0	1	0
hsa-miR-181a	MIMAT0000256	NM_007288	MME	membrane metallo-endopeptidase	0	0	1	1	0	0	0	1	0	1	0
hsa-miR-181a	MIMAT0000256	NM_007353	GNA12	guanine nucleotide binding protein (G protein) alpha 12	0	0	1	1	0	0	0	1	0	1	0
hsa-miR-181a	MIMAT0000256	NM_012080	HDHD1A	haloacid dehalogenase-like hydrolase domain containing 1A	0	0	1	1	0	0	0	1	0	1	0
hsa-miR-181a	MIMAT0000256	NM_012097	ARL5A	ADP-ribosylation factor-like 5A	0	0	0	1	0	0	1	1	0	1	0
hsa-miR-181a	MIMAT0000256	NM_012120	CD2AP	CD2-associated protein	0	0	1	0	0	0	0	1	0	1	1
hsa-miR-181a	MIMAT0000256	NM_012158	FBXL3	F-box and leucine-rich repeat protein 3	0	0	1	1	0	0	0	1	0	1	0
hsa-miR-181a	MIMAT0000256	NM_012252	TFEC	transcription factor EC	0	0	1	1	0	0	0	1	0	1	0
hsa-miR-181a	MIMAT0000256	NM_012388	PLDN	pallidin homolog (mouse)	0	0	1	1	0	0	0	1	0	1	0
hsa-miR-181a	MIMAT0000256	NM_012395	PFTK1	PFTAIRE protein kinase 1	0	0	1	0	0	0	1	1	0	1	0
hsa-miR-181a	MIMAT0000256	NM_012399	PITPNB	phosphatidylinositol transfer protein, beta	0	0	1	1	0	0	0	1	0	1	0
hsa-miR-181a	MIMAT0000256	NM_012406	PRDM4	PR domain containing 4	0	0	1	1	0	0	0	1	0	1	0
hsa-miR-181a	MIMAT0000256	NM_012428	NPTN	neuroplastin	0	0	0	0	0	0	1	1	0	1	1
hsa-miR-181a	MIMAT0000256	NM_012464	TLL1	tolloid-like 1	0	0	1	1	0	0	0	1	0	1	0
hsa-miR-181a	MIMAT0000256	NM_013255	MKLN1	muskelin 1, intracellular mediator containing kelch motifs	0	0	1	1	0	0	0	1	0	1	0
hsa-miR-181a	MIMAT0000256	NM_013313	YPEL1	yippee-like 1 (Drosophila)	0	0	1	1	0	0	0	1	0	1	0
hsa-miR-181a	MIMAT0000256	NM_013386	SLC25A24	solute carrier family 25 (mitochondrial carrier; phosphate carrier), member 24	0	0	1	1	0	0	0	1	0	1	0
hsa-miR-181a	MIMAT0000256	NM_013391	DMGDH	dimethylglycine dehydrogenase	0	0	1	1	0	0	0	1	0	1	0
hsa-miR-181a	MIMAT0000256	NM_013988	PARK2	Parkinson disease (autosomal recessive, juvenile) 2, parkin	0	0	1	1	0	0	0	1	0	1	0
hsa-miR-181a	MIMAT0000256	NM_013989	DIO2	deiodinase, iodothyronine, type II	0	0	1	0	0	0	1	1	0	1	0
hsa-miR-181a	MIMAT0000256	NM_014016	SACM1L	SAC1 suppressor of actin mutations 1-like (yeast)	0	0	1	0	0	0	0	1	0	1	1
hsa-miR-181a	MIMAT0000256	NM_014043	CHMP2B	chromatin modifying protein 2B	0	0	1	1	0	0	0	1	0	1	0
hsa-miR-181a	MIMAT0000256	NM_014055	IFT81	intraflagellar transport 81 homolog (Chlamydomonas)	0	0	1	1	0	0	0	1	0	1	0
hsa-miR-181a	MIMAT0000256	NM_014078	MRPL13	mitochondrial ribosomal protein L13	0	0	1	1	0	0	0	1	0	1	0
hsa-miR-181a	MIMAT0000256	NM_014098	PRDX3	peroxiredoxin 3	0	0	1	1	0	0	0	1	0	1	0
hsa-miR-181a	MIMAT0000256	NM_014141	CNTNAP2	contactin associated protein-like 2	0	0	0	0	0	0	1	1	0	1	1
hsa-miR-181a	MIMAT0000256	NM_014331	SLC7A11	solute carrier family 7, (cationic amino acid transporter, y+ system) member 11	0	0	1	1	0	0	0	1	0	1	0
hsa-miR-181a	MIMAT0000256	NM_014363	SACS	spastic ataxia of Charlevoix-Saguenay (sacsin)	0	0	1	0	0	0	1	1	0	1	0
hsa-miR-181a	MIMAT0000256	NM_014394	GHITM	growth hormone inducible transmembrane protein	0	0	0	1	0	0	0	1	0	1	1
hsa-miR-181a	MIMAT0000256	NM_014423	AFF4	AF4/FMR2 family, member 4	0	0	1	0	0	0	0	1	0	1	1
hsa-miR-181a	MIMAT0000256	NM_014426	SNX5	sorting nexin 5	0	0	1	1	0	0	0	1	0	1	0
hsa-miR-181a	MIMAT0000256	NM_014435	NAAA	N-acylethanolamine acid amidase	0	0	1	1	0	0	0	1	0	1	0
hsa-miR-181a	MIMAT0000256	NM_014451	BBS9	Bardet-Biedl syndrome 9	0	0	1	1	0	0	0	1	0	1	0
hsa-miR-181a	MIMAT0000256	NM_014630	ZNF592	zinc finger protein 592	0	0	1	1	0	0	0	1	0	1	0
hsa-miR-181a	MIMAT0000256	NM_014635	GCC2	GRIP and coiled-coil domain containing 2	0	0	1	1	0	0	0	1	0	1	0
hsa-miR-181a	MIMAT0000256	NM_014637	MTFR1	mitochondrial fission regulator 1	0	0	1	0	0	0	0	1	0	1	1
hsa-miR-181a	MIMAT0000256	NM_014653	WSCD2	WSC domain containing 2	0	0	1	0	0	0	0	1	0	1	1
hsa-miR-181a	MIMAT0000256	NM_014671	UBE3C	ubiquitin protein ligase E3C	0	0	1	0	0	0	0	1	0	1	1
hsa-miR-181a	MIMAT0000256	NM_014734	KIAA0247	KIAA0247	0	0	1	1	0	0	0	1	0	1	0
hsa-miR-181a	MIMAT0000256	NM_014737	RASSF2	Ras association (RalGDS/AF-6) domain family member 2	0	0	1	1	0	0	0	1	0	1	0
hsa-miR-181a	MIMAT0000256	NM_014791	MELK	maternal embryonic leucine zipper kinase	0	0	1	1	0	0	0	1	0	1	0
hsa-miR-181a	MIMAT0000256	NM_014827	ZC3H11A	zinc finger CCCH-type containing 11A	0	0	1	0	0	0	0	1	0	1	1
hsa-miR-181a	MIMAT0000256	NM_014839	LPPR4	plasticity related gene 1	0	0	0	0	0	0	1	1	0	1	1
hsa-miR-181a	MIMAT0000256	NM_014862	ARNT2	aryl-hydrocarbon receptor nuclear translocator 2	0	0	0	0	0	0	1	1	0	1	1
hsa-miR-181a	MIMAT0000256	NM_014873	LPGAT1	lysophosphatidylglycerol acyltransferase 1	0	0	1	1	0	0	0	1	0	1	0
hsa-miR-181a	MIMAT0000256	NM_014880	CD302	CD302 molecule	0	0	1	1	0	0	0	1	0	1	0
hsa-miR-181a	MIMAT0000256	NM_014911	AAK1	AP2 associated kinase 1	0	0	1	0	0	0	0	1	0	1	1
hsa-miR-181a	MIMAT0000256	NM_014923	FNDC3A	fibronectin type III domain containing 3A	0	0	1	0	0	0	1	1	0	1	0
hsa-miR-181a	MIMAT0000256	NM_014959	CARD8	caspase recruitment domain family, member 8	0	0	1	1	0	0	0	1	0	1	0
hsa-miR-181a	MIMAT0000256	NM_014967	MTMR15	myotubularin related protein 15	0	0	1	1	0	0	0	1	0	1	0
hsa-miR-181a	MIMAT0000256	NM_014974	DIP2C	DIP2 disco-interacting protein 2 homolog C (Drosophila)	0	0	1	1	0	0	0	1	0	1	0
hsa-miR-181a	MIMAT0000256	NM_014991	WDFY3	WD repeat and FYVE domain containing 3	0	0	1	1	0	0	0	1	0	1	0
hsa-miR-181a	MIMAT0000256	NM_014997	KIAA0265	KIAA0265 protein	0	0	1	0	0	0	1	1	0	1	0
hsa-miR-181a	MIMAT0000256	NM_015008	TMCC1	transmembrane and coiled-coil domain family 1	0	0	1	0	0	0	0	1	0	1	1
hsa-miR-181a	MIMAT0000256	NM_015018	DOPEY1	dopey family member 1	0	0	0	0	0	0	1	1	0	1	1
hsa-miR-181a	MIMAT0000256	NM_015020	PHLPPL	PH domain and leucine rich repeat protein phosphatase-like	0	0	1	1	0	0	0	1	0	1	0
hsa-miR-181a	MIMAT0000256	NM_015071	ARHGAP26	Rho GTPase activating protein 26	0	0	1	1	0	0	0	1	0	1	0
hsa-miR-181a	MIMAT0000256	NM_015088	TNRC6B	trinucleotide repeat containing 6B	0	0	1	1	0	0	0	1	0	1	0
hsa-miR-181a	MIMAT0000256	NM_015099	CAMTA2	calmodulin binding transcription activator 2	0	0	1	0	0	0	0	1	0	1	1
hsa-miR-181a	MIMAT0000256	NM_015156	RCOR1	REST corepressor 1	0	0	1	1	0	0	0	1	0	1	0
hsa-miR-181a	MIMAT0000256	NM_015172	BAT2D1	BAT2 domain containing 1	0	0	1	1	0	0	0	1	0	1	0
hsa-miR-181a	MIMAT0000256	NM_015229	KIAA0664	KIAA0664	0	0	1	0	0	0	0	1	0	1	1
hsa-miR-181a	MIMAT0000256	NM_015251	ATMIN	ATM interactor	0	0	1	1	0	0	0	1	0	1	0
hsa-miR-181a	MIMAT0000256	NM_015253	WSCD1	WSC domain containing 1	0	0	1	1	0	0	0	1	0	1	0
hsa-miR-181a	MIMAT0000256	NM_015257	TMEM194A	transmembrane protein 194A	0	0	1	1	0	0	0	1	0	1	0
hsa-miR-181a	MIMAT0000256	NM_015263	DMXL2	Dmx-like 2	0	0	0	1	0	0	0	1	0	1	1
hsa-miR-181a	MIMAT0000256	NM_015288	PHF15	PHD finger protein 15	0	0	0	0	0	0	1	1	0	1	1
hsa-miR-181a	MIMAT0000256	NM_015308	FNBP4	formin binding protein 4	0	0	1	1	0	0	0	1	0	1	0
hsa-miR-181a	MIMAT0000256	NM_015336	ZDHHC17	zinc finger, DHHC-type containing 17	0	0	1	0	0	0	0	1	0	1	1
hsa-miR-181a	MIMAT0000256	NM_015346	ZFYVE26	zinc finger, FYVE domain containing 26	0	0	1	1	0	0	0	1	0	1	0
hsa-miR-181a	MIMAT0000256	NM_015358	MORC3	MORC family CW-type zinc finger 3	0	0	1	1	0	0	0	1	0	1	0
hsa-miR-181a	MIMAT0000256	NM_015393	DKFZP564O0823	DKFZP564O0823 protein	0	0	1	1	0	0	0	1	0	1	0
hsa-miR-181a	MIMAT0000256	NM_015423	AASDHPPT	aminoadipate-semialdehyde dehydrogenase-phosphopantetheinyl transferase	0	0	1	1	0	0	0	1	0	1	0
hsa-miR-181a	MIMAT0000256	NM_015435	RNF19A	ring finger protein 19A	0	0	1	1	0	0	0	1	0	1	0
hsa-miR-181a	MIMAT0000256	NM_015576	ERC2	ELKS/RAB6-interacting/CAST family member 2	0	0	1	1	0	0	0	1	0	1	0
hsa-miR-181a	MIMAT0000256	NM_015697	COQ2	coenzyme Q2 homolog, prenyltransferase (yeast)	0	0	1	1	0	0	0	1	0	1	0
hsa-miR-181a	MIMAT0000256	NM_015716	MINK1	misshapen-like kinase 1 (zebrafish)	0	0	1	0	0	0	1	1	0	1	0
hsa-miR-181a	MIMAT0000256	NM_015891	CDC40	cell division cycle 40 homolog (S. cerevisiae)	0	0	1	1	0	0	0	1	0	1	0
hsa-miR-181a	MIMAT0000256	NM_015967	PTPN22	protein tyrosine phosphatase, non-receptor type 22 (lymphoid)	0	0	1	1	0	0	0	1	0	1	0
hsa-miR-181a	MIMAT0000256	NM_015990	KLHL5	kelch-like 5 (Drosophila)	0	0	1	1	0	0	0	1	0	1	0
hsa-miR-181a	MIMAT0000256	NM_016033	FAM82B	family with sequence similarity 82, member B	0	0	1	1	0	0	0	1	0	1	0
hsa-miR-181a	MIMAT0000256	NM_016040	TMED5	transmembrane emp24 protein transport domain containing 5	0	0	0	0	0	0	1	1	0	1	1
hsa-miR-181a	MIMAT0000256	NM_016052	RRP15	ribosomal RNA processing 15 homolog (S. cerevisiae)	0	0	1	1	0	0	0	1	0	1	0
hsa-miR-181a	MIMAT0000256	NM_016081	PALLD	palladin, cytoskeletal associated protein	0	0	0	0	0	0	1	1	0	1	1
hsa-miR-181a	MIMAT0000256	NM_016121	KCTD3	potassium channel tetramerisation domain containing 3	0	0	1	1	0	0	0	1	0	1	0
hsa-miR-181a	MIMAT0000256	NM_016252	BIRC6	baculoviral IAP repeat-containing 6 (apollon)	0	0	0	1	0	0	0	1	0	1	1
hsa-miR-181a	MIMAT0000256	NM_016275	SELT	selenoprotein T	0	0	1	1	0	0	0	1	0	1	0
hsa-miR-181a	MIMAT0000256	NM_016282	AK3	adenylate kinase 3	0	0	1	1	0	0	0	1	0	1	0
hsa-miR-181a	MIMAT0000256	NM_016376	ANKFY1	ankyrin repeat and FYVE domain containing 1	0	0	1	0	0	0	0	1	0	1	1
hsa-miR-181a	MIMAT0000256	NM_016472	C14orf129	chromosome 14 open reading frame 129	0	0	0	1	0	0	0	1	0	1	1
hsa-miR-181a	MIMAT0000256	NM_016631	C21orf66	chromosome 21 open reading frame 66	0	0	1	1	0	0	0	1	0	1	0
hsa-miR-181a	MIMAT0000256	NM_016653	ZAK	sterile alpha motif and leucine zipper containing kinase AZK	0	0	1	1	0	0	0	1	0	1	0
hsa-miR-181a	MIMAT0000256	NM_016831	PER3	period homolog 3 (Drosophila)	0	0	1	1	0	0	0	1	0	1	0
hsa-miR-181a	MIMAT0000256	NM_017420	SIX4	SIX homeobox 4	0	0	1	0	0	0	0	1	0	1	1
hsa-miR-181a	MIMAT0000256	NM_017455	NPTN	neuroplastin	0	0	1	0	0	0	1	1	0	1	0
hsa-miR-181a	MIMAT0000256	NM_017551	GRID1	glutamate receptor, ionotropic, delta 1	0	0	1	0	0	0	0	1	0	1	1
hsa-miR-181a	MIMAT0000256	NM_017580	ZRANB1	zinc finger, RAN-binding domain containing 1	0	0	1	1	0	0	0	1	0	1	0
hsa-miR-181a	MIMAT0000256	NM_017593	BMP2K	BMP2 inducible kinase	0	0	1	1	0	0	0	1	0	1	0
hsa-miR-181a	MIMAT0000256	NM_017633	FAM46A	family with sequence similarity 46, member A	0	0	1	0	0	0	0	1	0	1	1
hsa-miR-181a	MIMAT0000256	NM_017637	BNC2	basonuclin 2	0	0	1	0	0	0	0	1	0	1	1
hsa-miR-181a	MIMAT0000256	NM_017650	PPP1R9A	protein phosphatase 1, regulatory (inhibitor) subunit 9A	0	0	1	1	0	0	0	1	0	1	0
hsa-miR-181a	MIMAT0000256	NM_017656	ZNF562	zinc finger protein 562	0	0	1	1	0	0	0	1	0	1	0
hsa-miR-181a	MIMAT0000256	NM_017657	AFTPH	aftiphilin	0	0	0	1	0	0	1	1	0	1	0
hsa-miR-181a	MIMAT0000256	NM_017705	PAQR5	progestin and adipoQ receptor family member V	0	0	1	1	0	0	0	1	0	1	0
hsa-miR-181a	MIMAT0000256	NM_017740	ZDHHC7	zinc finger, DHHC-type containing 7	0	0	0	0	0	0	1	1	0	1	1
hsa-miR-181a	MIMAT0000256	NM_017770	ELOVL2	elongation of very long chain fatty acids (FEN1/Elo2, SUR4/Elo3, yeast)-like 2	0	0	1	0	0	0	0	1	0	1	1
hsa-miR-181a	MIMAT0000256	NM_017776	ZNF673	zinc finger family member 673	0	0	1	1	0	0	0	1	0	1	0
hsa-miR-181a	MIMAT0000256	NM_017789	SEMA4C	sema domain, immunoglobulin domain (Ig), transmembrane domain (TM) and short cytoplasmic domain, (semaphorin) 4C	0	0	0	0	0	0	1	1	0	1	1
hsa-miR-181a	MIMAT0000256	NM_017849	TMEM127	transmembrane protein 127	0	0	1	0	0	0	0	1	0	1	1
hsa-miR-181a	MIMAT0000256	NM_017898	MOSC2	MOCO sulphurase C-terminal domain containing 2	0	0	1	1	0	0	0	1	0	1	0
hsa-miR-181a	MIMAT0000256	NM_017938	FAM70A	family with sequence similarity 70, member A	0	0	1	1	0	0	0	1	0	1	0
hsa-miR-181a	MIMAT0000256	NM_017987	RUFY2	RUN and FYVE domain containing 2	0	0	1	1	0	0	0	1	0	1	0
hsa-miR-181a	MIMAT0000256	NM_018013	SOBP	sine oculis binding protein homolog (Drosophila)	0	0	1	1	0	0	0	1	0	1	0
hsa-miR-181a	MIMAT0000256	NM_018048	MAGOHB	mago-nashi homolog B (Drosophila)	0	0	1	1	0	0	0	1	0	1	0
hsa-miR-181a	MIMAT0000256	NM_018086	FIGN	fidgetin	0	0	0	1	0	0	0	1	0	1	1
hsa-miR-181a	MIMAT0000256	NM_018103	LRRC8D	leucine rich repeat containing 8 family, member D	0	0	0	1	0	0	1	1	0	1	0
hsa-miR-181a	MIMAT0000256	NM_018126	TMEM33	transmembrane protein 33	0	0	1	1	0	0	0	1	0	1	0
hsa-miR-181a	MIMAT0000256	NM_018130	SHQ1	SHQ1 homolog (S. cerevisiae)	0	0	1	1	0	0	0	1	0	1	0
hsa-miR-181a	MIMAT0000256	NM_018133	MSL2L1	male-specific lethal 2-like 1 (Drosophila)	0	0	1	0	0	0	1	1	0	1	0
hsa-miR-181a	MIMAT0000256	NM_018176	LGI2	leucine-rich repeat LGI family, member 2	0	0	1	1	0	0	0	1	0	1	0
hsa-miR-181a	MIMAT0000256	NM_018190	BBS7	Bardet-Biedl syndrome 7	0	0	1	1	0	0	0	1	0	1	0
hsa-miR-181a	MIMAT0000256	NM_018237	CCAR1	cell division cycle and apoptosis regulator 1	0	0	0	1	0	0	0	1	0	1	1
hsa-miR-181a	MIMAT0000256	NM_018241	TMEM184C	transmembrane protein 184C	0	0	1	1	0	0	0	1	0	1	0
hsa-miR-181a	MIMAT0000256	NM_018246	CCDC25	coiled-coil domain containing 25	0	0	1	1	0	0	0	1	0	1	0
hsa-miR-181a	MIMAT0000256	NM_018293	ZNF654	zinc finger protein 654	0	0	1	1	0	0	0	1	0	1	0
hsa-miR-181a	MIMAT0000256	NM_018300	ZNF83	zinc finger protein 83	0	0	1	1	0	0	0	1	0	1	0
hsa-miR-181a	MIMAT0000256	NM_018374	TMEM106B	transmembrane protein 106B	0	0	1	1	0	0	0	1	0	1	0
hsa-miR-181a	MIMAT0000256	NM_018407	LAPTM4B	lysosomal associated protein transmembrane 4 beta	0	0	1	1	0	0	0	1	0	1	0
hsa-miR-181a	MIMAT0000256	NM_018437	HEMGN	hemogen	0	0	1	1	0	0	0	1	0	1	0
hsa-miR-181a	MIMAT0000256	NM_018440	PAG1	phosphoprotein associated with glycosphingolipid microdomains 1	0	0	1	1	0	0	0	1	0	1	0
hsa-miR-181a	MIMAT0000256	NM_018475	TMEM165	transmembrane protein 165	0	0	1	1	0	0	0	1	0	1	0
hsa-miR-181a	MIMAT0000256	NM_018538	ERMAP	erythroblast membrane-associated protein (Scianna blood group)	0	0	1	1	0	0	0	1	0	1	0
hsa-miR-181a	MIMAT0000256	NM_018566	YOD1	YOD1 OTU deubiquinating enzyme 1 homolog (S. cerevisiae)	0	0	1	0	0	0	0	1	0	1	1
hsa-miR-181a	MIMAT0000256	NM_018602	DNAJA4	DnaJ (Hsp40) homolog, subfamily A, member 4	0	0	1	1	0	0	0	1	0	1	0
hsa-miR-181a	MIMAT0000256	NM_018638	ETNK1	ethanolamine kinase 1	0	0	1	0	0	0	0	1	0	1	1
hsa-miR-181a	MIMAT0000256	NM_018650	MARK1	MAP/microtubule affinity-regulating kinase 1	0	0	1	1	0	0	0	1	0	1	0
hsa-miR-181a	MIMAT0000256	NM_018682	MLL5	myeloid/lymphoid or mixed-lineage leukemia 5 (trithorax homolog, Drosophila)	0	0	1	1	0	0	0	1	0	1	0
hsa-miR-181a	MIMAT0000256	NM_018958	C15orf2	chromosome 15 open reading frame 2	0	0	1	1	0	0	0	1	0	1	0
hsa-miR-181a	MIMAT0000256	NM_018963	BRWD1	bromodomain and WD repeat domain containing 1	0	0	1	1	0	0	0	1	0	1	0
hsa-miR-181a	MIMAT0000256	NM_019001	XRN1	5"-3" exoribonuclease 1	0	0	1	1	0	0	0	1	0	1	0
hsa-miR-181a	MIMAT0000256	NM_019027	RBM47	RNA binding motif protein 47	0	0	0	0	0	0	1	1	0	1	1
hsa-miR-181a	MIMAT0000256	NM_019030	DHX29	DEAH (Asp-Glu-Ala-His) box polypeptide 29	0	0	1	1	0	0	0	1	0	1	0
hsa-miR-181a	MIMAT0000256	NM_019058	DDIT4	DNA-damage-inducible transcript 4	0	0	1	1	0	0	0	1	0	1	0
hsa-miR-181a	MIMAT0000256	NM_019094	NUDT4	nudix (nucleoside diphosphate linked moiety X)-type motif 4	0	0	1	1	0	0	0	1	0	1	0
hsa-miR-181a	MIMAT0000256	NM_019114	EPB41L4B	erythrocyte membrane protein band 4.1 like 4B	0	0	0	0	0	0	1	1	0	1	1
hsa-miR-181a	MIMAT0000256	NM_019556	MOSPD1	motile sperm domain containing 1	0	0	1	1	0	0	0	1	0	1	0
hsa-miR-181a	MIMAT0000256	NM_020193	C11orf30	chromosome 11 open reading frame 30	0	0	1	0	0	0	0	1	0	1	1
hsa-miR-181a	MIMAT0000256	NM_020207	C9orf102	chromosome 9 open reading frame 102	0	0	1	1	0	0	0	1	0	1	0
hsa-miR-181a	MIMAT0000256	NM_020245	TULP4	tubby like protein 4	0	0	1	0	0	0	1	1	0	1	0
hsa-miR-181a	MIMAT0000256	NM_020247	CABC1	chaperone, ABC1 activity of bc1 complex homolog (S. pombe)	0	0	1	1	0	0	0	1	0	1	0
hsa-miR-181a	MIMAT0000256	NM_020341	PAK7	p21 protein (Cdc42/Rac)-activated kinase 7	0	0	1	0	0	0	0	1	0	1	1
hsa-miR-181a	MIMAT0000256	NM_020416	PPP2R2C	protein phosphatase 2 (formerly 2A), regulatory subunit B, gamma isoform	0	0	1	0	0	0	1	1	0	1	0
hsa-miR-181a	MIMAT0000256	NM_020424	LYRM1	LYR motif containing 1	0	0	1	1	0	0	0	1	0	1	0
hsa-miR-181a	MIMAT0000256	NM_020432	PHTF2	putative homeodomain transcription factor 2	0	0	0	1	0	0	0	1	0	1	1
hsa-miR-181a	MIMAT0000256	NM_020465	NDRG4	NDRG family member 4	0	0	1	1	0	0	0	1	0	1	0
hsa-miR-181a	MIMAT0000256	NM_020665	TMEM27	transmembrane protein 27	0	0	1	1	0	0	0	1	0	1	0
hsa-miR-181a	MIMAT0000256	NM_020692	GALNTL1	UDP-N-acetyl-alpha-D-galactosamine:polypeptide N-acetylgalactosaminyltransferase-like 1	0	0	1	0	0	0	0	1	0	1	1
hsa-miR-181a	MIMAT0000256	NM_020718	USP31	ubiquitin specific peptidase 31	0	0	1	1	0	0	0	1	0	1	0
hsa-miR-181a	MIMAT0000256	NM_020726	NLN	neurolysin (metallopeptidase M3 family)	0	0	1	1	0	0	0	1	0	1	0
hsa-miR-181a	MIMAT0000256	NM_020734	FAM80B	family with sequence similarity 80, member B	0	0	1	0	0	0	0	1	0	1	1
hsa-miR-181a	MIMAT0000256	NM_020749	MTUS1	mitochondrial tumor suppressor 1	0	0	1	1	0	0	0	1	0	1	0
hsa-miR-181a	MIMAT0000256	NM_020773	TBC1D14	TBC1 domain family, member 14	0	0	1	1	0	0	0	1	0	1	0
hsa-miR-181a	MIMAT0000256	NM_020782	KLHDC5	kelch domain containing 5	0	0	1	1	0	0	0	1	0	1	0
hsa-miR-181a	MIMAT0000256	NM_020808	SIPA1L2	signal-induced proliferation-associated 1 like 2	0	0	0	1	0	0	0	1	0	1	1
hsa-miR-181a	MIMAT0000256	NM_020828	ZFP28	zinc finger protein 28 homolog (mouse)	0	0	1	1	0	0	0	1	0	1	0
hsa-miR-181a	MIMAT0000256	NM_020868	DPP10	dipeptidyl-peptidase 10	0	0	1	0	0	0	1	1	0	1	0
hsa-miR-181a	MIMAT0000256	NM_020917	ZFP14	zinc finger protein 14 homolog (mouse)	0	0	1	1	0	0	0	1	0	1	0
hsa-miR-181a	MIMAT0000256	NM_021030	ZNF14	zinc finger protein 14	0	0	1	1	0	0	0	1	0	1	0
hsa-miR-181a	MIMAT0000256	NM_021072	HCN1	hyperpolarization activated cyclic nucleotide-gated potassium channel 1	0	0	1	1	0	0	0	1	0	1	0
hsa-miR-181a	MIMAT0000256	NM_021111	RECK	reversion-inducing-cysteine-rich protein with kazal motifs	0	0	0	0	0	0	1	1	0	1	1
hsa-miR-181a	MIMAT0000256	NM_021161	KCNK10	potassium channel, subfamily K, member 10	0	0	0	0	0	0	1	1	0	1	1
hsa-miR-181a	MIMAT0000256	NM_021190	PTBP2	polypyrimidine tract binding protein 2	0	0	1	1	0	0	0	1	0	1	0
hsa-miR-181a	MIMAT0000256	NM_021237	SELK	selenoprotein K	0	0	1	1	0	0	0	1	0	1	0
hsa-miR-181a	MIMAT0000256	NM_021627	SENP2	SUMO1/sentrin/SMT3 specific peptidase 2	0	0	0	0	0	0	1	1	0	1	1
hsa-miR-181a	MIMAT0000256	NM_021629	GNB4	guanine nucleotide binding protein (G protein), beta polypeptide 4	0	0	1	1	0	0	0	1	0	1	0
hsa-miR-181a	MIMAT0000256	NM_021809	TGIF2	TGFB-induced factor homeobox 2	0	0	1	1	0	0	0	1	0	1	0
hsa-miR-181a	MIMAT0000256	NM_021813	BACH2	BTB and CNC homology 1, basic leucine zipper transcription factor 2	0	0	0	0	0	0	1	1	0	1	1
hsa-miR-181a	MIMAT0000256	NM_021821	MRPS35	mitochondrial ribosomal protein S35	0	0	1	1	0	0	0	1	0	1	0
hsa-miR-181a	MIMAT0000256	NM_021956	GRIK2	glutamate receptor, ionotropic, kainate 2	0	0	1	0	0	0	1	1	0	1	0
hsa-miR-181a	MIMAT0000256	NM_021961	TEAD1	TEA domain family member 1 (SV40 transcriptional enhancer factor)	0	0	1	0	0	0	0	1	0	1	1
hsa-miR-181a	MIMAT0000256	NM_021973	HAND2	heart and neural crest derivatives expressed 2	0	0	1	0	0	0	0	1	0	1	1
hsa-miR-181a	MIMAT0000256	NM_021994	ZNF277	zinc finger protein 277	0	0	1	1	0	0	0	1	0	1	0
hsa-miR-181a	MIMAT0000256	NM_022118	RBM26	RNA binding motif protein 26	0	0	0	1	0	0	0	1	0	1	1
hsa-miR-181a	MIMAT0000256	NM_022166	XYLT1	xylosyltransferase I	0	0	1	0	0	0	0	1	0	1	1
hsa-miR-181a	MIMAT0000256	NM_022456	RAB3IP	RAB3A interacting protein (rabin3)	0	0	1	1	0	0	0	1	0	1	0
hsa-miR-181a	MIMAT0000256	NM_022459	XPO4	exportin 4	0	0	1	0	0	0	1	1	0	1	0
hsa-miR-181a	MIMAT0000256	NM_022491	SUDS3	suppressor of defective silencing 3 homolog (S. cerevisiae)	0	0	1	1	0	0	0	1	0	1	0
hsa-miR-181a	MIMAT0000256	NM_022748	TNS3	tensin 3	0	0	1	1	0	0	0	1	0	1	0
hsa-miR-181a	MIMAT0000256	NM_022756	C1orf149	chromosome 1 open reading frame 149	0	0	0	0	0	0	1	1	0	1	1
hsa-miR-181a	MIMAT0000256	NM_022757	CCDC14	coiled-coil domain containing 14	0	0	1	1	0	0	0	1	0	1	0
hsa-miR-181a	MIMAT0000256	NM_022783	DEPDC6	DEP domain containing 6	0	0	1	1	0	0	0	1	0	1	0
hsa-miR-181a	MIMAT0000256	NM_022789	IL25	interleukin 25	0	0	1	1	0	0	0	1	0	1	0
hsa-miR-181a	MIMAT0000256	NM_022910	NDRG4	NDRG family member 4	0	0	1	1	0	0	0	1	0	1	0
hsa-miR-181a	MIMAT0000256	NM_023923	PHACTR4	phosphatase and actin regulator 4	0	0	1	1	0	0	0	1	0	1	0
hsa-miR-181a	MIMAT0000256	NM_024015	HOXB4	homeobox B4	0	0	1	1	0	0	0	1	0	1	0
hsa-miR-181a	MIMAT0000256	NM_024408	NOTCH2	Notch homolog 2 (Drosophila)	0	0	1	1	0	0	0	1	0	1	0
hsa-miR-181a	MIMAT0000256	NM_024423	DSC3	desmocollin 3	0	0	1	1	0	0	0	1	0	1	0
hsa-miR-181a	MIMAT0000256	NM_024496	C14orf4	chromosome 14 open reading frame 4	0	0	0	0	0	0	1	1	0	1	1
hsa-miR-181a	MIMAT0000256	NM_024511	C4orf15	chromosome 4 open reading frame 15	0	0	1	1	0	0	0	1	0	1	0
hsa-miR-181a	MIMAT0000256	NM_024529	CDC73	cell division cycle 73, Paf1/RNA polymerase II complex component, homolog (S. cerevisiae)	0	0	0	0	0	0	1	1	0	1	1
hsa-miR-181a	MIMAT0000256	NM_024577	SH3TC2	SH3 domain and tetratricopeptide repeats 2	0	0	1	1	0	0	0	1	0	1	0
hsa-miR-181a	MIMAT0000256	NM_024665	TBL1XR1	transducin (beta)-like 1 X-linked receptor 1	0	0	0	1	0	0	0	1	0	1	1
hsa-miR-181a	MIMAT0000256	NM_024713	C15orf29	chromosome 15 open reading frame 29	0	0	1	1	0	0	0	1	0	1	0
hsa-miR-181a	MIMAT0000256	NM_024740	ALG9	asparagine-linked glycosylation 9 homolog (S. cerevisiae, alpha- 1,2-mannosyltransferase)	0	0	1	1	0	0	0	1	0	1	0
hsa-miR-181a	MIMAT0000256	NM_024830	LPCAT1	lysophosphatidylcholine acyltransferase 1	0	0	1	0	0	0	0	1	0	1	1
hsa-miR-181a	MIMAT0000256	NM_024910	ZNF767	zinc finger family member 767	0	0	1	1	0	0	0	1	0	1	0
hsa-miR-181a	MIMAT0000256	NM_024989	PGAP1	post-GPI attachment to proteins 1	0	0	1	1	0	0	0	1	0	1	0
hsa-miR-181a	MIMAT0000256	NM_025187	C16orf70	chromosome 16 open reading frame 70	0	0	1	0	0	0	0	1	0	1	1
hsa-miR-181a	MIMAT0000256	NM_025222	WDR82	WD repeat domain 82	0	0	1	0	0	0	0	1	0	1	1
hsa-miR-181a	MIMAT0000256	NM_030780	SLC25A32	solute carrier family 25, member 32	0	0	1	1	0	0	0	1	0	1	0
hsa-miR-181a	MIMAT0000256	NM_031306	DDX59	DEAD (Asp-Glu-Ala-Asp) box polypeptide 59	0	0	1	1	0	0	0	1	0	1	0
hsa-miR-181a	MIMAT0000256	NM_031411	PCDHA1	protocadherin alpha 1	0	0	0	1	0	0	1	1	0	1	0
hsa-miR-181a	MIMAT0000256	NM_031435	THAP2	THAP domain containing, apoptosis associated protein 2	0	0	1	1	0	0	0	1	0	1	0
hsa-miR-181a	MIMAT0000256	NM_031438	NUDT12	nudix (nucleoside diphosphate linked moiety X)-type motif 12	0	0	1	1	0	0	0	1	0	1	0
hsa-miR-181a	MIMAT0000256	NM_031857	PCDHA9	protocadherin alpha 9	0	0	0	1	0	0	1	1	0	1	0
hsa-miR-181a	MIMAT0000256	NM_031860	PCDHA10	protocadherin alpha 10	0	0	0	1	0	0	1	1	0	1	0
hsa-miR-181a	MIMAT0000256	NM_031912	SYT15	synaptotagmin XV	0	0	1	1	0	0	0	1	0	1	0
hsa-miR-181a	MIMAT0000256	NM_031966	CCNB1	cyclin B1	0	0	1	1	0	0	0	1	0	1	0
hsa-miR-181a	MIMAT0000256	NM_032041	NCALD	neurocalcin delta	0	0	1	0	0	0	1	1	0	1	0
hsa-miR-181a	MIMAT0000256	NM_032047	B3GNT5	UDP-GlcNAc:betaGal beta-1,3-N-acetylglucosaminyltransferase 5	0	0	1	1	0	0	0	1	0	1	0
hsa-miR-181a	MIMAT0000256	NM_032156	CAPRIN2	caprin family member 2	0	0	1	1	0	0	0	1	0	1	0
hsa-miR-181a	MIMAT0000256	NM_032298	SYT3	synaptotagmin III	0	0	1	0	0	0	0	1	0	1	1
hsa-miR-181a	MIMAT0000256	NM_032415	CARD11	caspase recruitment domain family, member 11	0	0	0	0	0	0	1	1	0	1	1
hsa-miR-181a	MIMAT0000256	NM_032446	MEGF10	multiple EGF-like-domains 10	0	0	1	1	0	0	0	1	0	1	0
hsa-miR-181a	MIMAT0000256	NM_032497	ZNF559	zinc finger protein 559	0	0	1	1	0	0	0	1	0	1	0
hsa-miR-181a	MIMAT0000256	NM_032539	SLITRK2	SLIT and NTRK-like family, member 2	0	0	0	0	0	0	1	1	0	1	1
hsa-miR-181a	MIMAT0000256	NM_032643	IRF5	interferon regulatory factor 5	0	0	1	1	0	0	0	1	0	1	0
hsa-miR-181a	MIMAT0000256	NM_032801	JAM3	junctional adhesion molecule 3	0	0	1	1	0	0	0	1	0	1	0
hsa-miR-181a	MIMAT0000256	NM_032825	ZNF382	zinc finger protein 382	0	0	1	1	0	0	0	1	0	1	0
hsa-miR-181a	MIMAT0000256	NM_032859	ABHD13	abhydrolase domain containing 13	0	0	1	1	0	0	0	1	0	1	0
hsa-miR-181a	MIMAT0000256	NM_032860	LTV1	LTV1 homolog (S. cerevisiae)	0	0	1	1	0	0	0	1	0	1	0
hsa-miR-181a	MIMAT0000256	NM_032973	PCDH11Y	protocadherin 11 Y-linked	0	0	1	1	0	0	0	1	0	1	0
hsa-miR-181a	MIMAT0000256	NM_032977	CASP10	caspase 10, apoptosis-related cysteine peptidase	0	0	1	0	0	0	1	1	0	1	0
hsa-miR-181a	MIMAT0000256	NM_033030	BOLL	bol, boule-like (Drosophila)	0	0	1	1	0	0	0	1	0	1	0
hsa-miR-181a	MIMAT0000256	NM_033132	ZIC5	Zic family member 5 (odd-paired homolog, Drosophila)	0	0	1	0	0	0	0	1	0	1	1
hsa-miR-181a	MIMAT0000256	NM_033305	VPS13A	vacuolar protein sorting 13 homolog A (S. cerevisiae)	0	0	1	1	0	0	0	1	0	1	0
hsa-miR-181a	MIMAT0000256	NM_033331	CDC14B	CDC14 cell division cycle 14 homolog B (S. cerevisiae)	0	0	1	1	0	0	0	1	0	1	0
hsa-miR-181a	MIMAT0000256	NM_033334	NR6A1	nuclear receptor subfamily 6, group A, member 1	0	0	0	1	0	0	1	1	0	1	0
hsa-miR-181a	MIMAT0000256	NM_033430	PDE5A	phosphodiesterase 5A, cGMP-specific	0	0	1	1	0	0	0	1	0	1	0
hsa-miR-181a	MIMAT0000256	NM_033437	PDE5A	phosphodiesterase 5A, cGMP-specific	0	0	1	1	0	0	0	1	0	1	0
hsa-miR-181a	MIMAT0000256	NM_052811	TRIM13	tripartite motif-containing 13	0	0	1	0	0	0	1	1	0	1	0
hsa-miR-181a	MIMAT0000256	NM_052851	STARD13	StAR-related lipid transfer (START) domain containing 13	0	0	1	1	0	0	0	1	0	1	0
hsa-miR-181a	MIMAT0000256	NM_052864	TIFA	TRAF-interacting protein with forkhead-associated domain	0	0	1	1	0	0	0	1	0	1	0
hsa-miR-181a	MIMAT0000256	NM_052978	TRIM9	tripartite motif-containing 9	0	0	1	0	0	0	1	1	0	1	0
hsa-miR-181a	MIMAT0000256	NM_053016	PALM2	paralemmin 2	0	0	1	1	0	0	0	1	0	1	0
hsa-miR-181a	MIMAT0000256	NM_054014	FKBP1A	FK506 binding protein 1A, 12kDa	0	0	1	1	0	0	0	1	0	1	0
hsa-miR-181a	MIMAT0000256	NM_057168	WNT16	wingless-type MMTV integration site family, member 16	0	0	1	1	0	0	0	1	0	1	0
hsa-miR-181a	MIMAT0000256	NM_130809	PRRC1	proline-rich coiled-coil 1	0	0	1	1	0	0	0	1	0	1	0
hsa-miR-181a	MIMAT0000256	NM_133369	UNC5A	unc-5 homolog A (C. elegans)	0	0	1	0	0	0	0	1	0	1	1
hsa-miR-181a	MIMAT0000256	NM_133372	FNIP1	folliculin interacting protein 1	0	0	1	1	0	0	0	1	0	1	0
hsa-miR-181a	MIMAT0000256	NM_133374	ZNF618	zinc finger protein 618	0	0	1	0	0	0	0	1	0	1	1
hsa-miR-181a	MIMAT0000256	NM_133433	NIPBL	Nipped-B homolog (Drosophila)	0	0	0	0	0	0	1	1	0	1	1
hsa-miR-181a	MIMAT0000256	NM_133458	ZFP90	zinc finger protein 90 homolog (mouse)	0	0	1	0	0	0	0	1	0	1	1
hsa-miR-181a	MIMAT0000256	NM_133466	ZNF545	zinc finger protein 545	0	0	1	1	0	0	0	1	0	1	0
hsa-miR-181a	MIMAT0000256	NM_133477	SYNPO2	synaptopodin 2	0	0	1	1	0	0	0	1	0	1	0
hsa-miR-181a	MIMAT0000256	NM_133503	DCN	decorin	0	0	1	1	0	0	0	1	0	1	0
hsa-miR-181a	MIMAT0000256	NM_133505	DCN	decorin	0	0	1	1	0	0	0	1	0	1	0
hsa-miR-181a	MIMAT0000256	NM_133650	SYNE1	spectrin repeat containing, nuclear envelope 1	0	0	1	0	0	0	1	1	0	1	0
hsa-miR-181a	MIMAT0000256	NM_134265	WSB1	WD repeat and SOCS box-containing 1	0	0	1	0	0	0	1	1	0	1	0
hsa-miR-181a	MIMAT0000256	NM_138292	ATM	ataxia telangiectasia mutated	0	0	1	1	0	0	0	1	0	1	0
hsa-miR-181a	MIMAT0000256	NM_138370	LOC91461	hypothetical protein BC007901	0	0	1	0	0	0	0	1	0	1	1
hsa-miR-181a	MIMAT0000256	NM_138621	BCL2L11	BCL2-like 11 (apoptosis facilitator)	0	0	1	0	0	0	1	1	0	1	0
hsa-miR-181a	MIMAT0000256	NM_138735	NRXN1	neurexin 1	0	0	0	1	0	0	1	1	0	1	0
hsa-miR-181a	MIMAT0000256	NM_138821	PAM	peptidylglycine alpha-amidating monooxygenase	0	0	0	1	0	0	1	1	0	1	0
hsa-miR-181a	MIMAT0000256	NM_138959	VANGL1	vang-like 1 (van gogh, Drosophila)	0	0	1	1	0	0	0	1	0	1	0
hsa-miR-181a	MIMAT0000256	NM_139281	WDR36	WD repeat domain 36	0	0	1	1	0	0	0	1	0	1	0
hsa-miR-181a	MIMAT0000256	NM_139321	ATRN	attractin	0	0	0	1	0	0	1	1	0	1	0
hsa-miR-181a	MIMAT0000256	NM_144498	OSBPL2	oxysterol binding protein-like 2	0	0	1	1	0	0	0	1	0	1	0
hsa-miR-181a	MIMAT0000256	NM_144566	ZNF700	zinc finger protein 700	0	0	1	1	0	0	0	1	0	1	0
hsa-miR-181a	MIMAT0000256	NM_144571	CNOT6L	CCR4-NOT transcription complex, subunit 6-like	0	0	1	0	0	0	0	1	0	1	1
hsa-miR-181a	MIMAT0000256	NM_144578	MAPK1IP1L	mitogen-activated protein kinase 1 interacting protein 1-like	0	0	1	1	0	0	0	1	0	1	0
hsa-miR-181a	MIMAT0000256	NM_144583	ATP6V1C2	ATPase, H+ transporting, lysosomal 42kDa, V1 subunit C2	0	0	1	1	0	0	0	1	0	1	0
hsa-miR-181a	MIMAT0000256	NM_144689	ZNF420	zinc finger protein 420	0	0	1	1	0	0	0	1	0	1	0
hsa-miR-181a	MIMAT0000256	NM_145025	C6orf199	chromosome 6 open reading frame 199	0	0	1	1	0	0	0	1	0	1	0
hsa-miR-181a	MIMAT0000256	NM_145206	VTI1A	vesicle transport through interaction with t-SNAREs homolog 1A (yeast)	0	0	1	1	0	0	0	1	0	1	0
hsa-miR-181a	MIMAT0000256	NM_145276	ZNF563	zinc finger protein 563	0	0	1	1	0	0	0	1	0	1	0
hsa-miR-181a	MIMAT0000256	NM_145733	SEPT3	septin 3	0	0	1	0	0	0	1	1	0	1	0
hsa-miR-181a	MIMAT0000256	NM_145753	PHLDB2	pleckstrin homology-like domain, family B, member 2	0	0	1	1	0	0	0	1	0	1	0
hsa-miR-181a	MIMAT0000256	NM_145756	ZNF396	zinc finger protein 396	0	0	1	1	0	0	0	1	0	1	0
hsa-miR-181a	MIMAT0000256	NM_147128	ZNRF2	zinc and ring finger 2	0	0	1	1	0	0	0	1	0	1	0
hsa-miR-181a	MIMAT0000256	NM_147187	TNFRSF10B	tumor necrosis factor receptor superfamily, member 10b	0	0	1	1	0	0	0	1	0	1	0
hsa-miR-181a	MIMAT0000256	NM_152227	SNX5	sorting nexin 5	0	0	1	1	0	0	0	1	0	1	0
hsa-miR-181a	MIMAT0000256	NM_152262	ZNF439	zinc finger protein 439	0	0	1	1	0	0	0	1	0	1	0
hsa-miR-181a	MIMAT0000256	NM_152291	MUC7	mucin 7, secreted	0	0	1	1	0	0	0	1	0	1	0
hsa-miR-181a	MIMAT0000256	NM_152367	C1orf161	chromosome 1 open reading frame 161	0	0	1	1	0	0	0	1	0	1	0
hsa-miR-181a	MIMAT0000256	NM_152437	ZNF664	zinc finger protein 664	0	0	1	0	0	0	0	1	0	1	1
hsa-miR-181a	MIMAT0000256	NM_152687	C5orf29	chromosome 5 open reading frame 29	0	0	1	1	0	0	0	1	0	1	0
hsa-miR-181a	MIMAT0000256	NM_152703	SAMD9L	sterile alpha motif domain containing 9-like	0	0	1	1	0	0	0	1	0	1	0
hsa-miR-181a	MIMAT0000256	NM_152734	C6orf89	chromosome 6 open reading frame 89	0	0	1	1	0	0	0	1	0	1	0
hsa-miR-181a	MIMAT0000256	NM_152774	TMEM196	transmembrane protein 196	0	0	1	1	0	0	0	1	0	1	0
hsa-miR-181a	MIMAT0000256	NM_152871	FAS	Fas (TNF receptor superfamily, member 6)	0	0	1	1	0	0	0	1	0	1	0
hsa-miR-181a	MIMAT0000256	NM_152910	DGKH	diacylglycerol kinase, eta	0	0	1	1	0	0	0	1	0	1	0
hsa-miR-181a	MIMAT0000256	NM_152996	ST6GALNAC3	ST6 (alpha-N-acetyl-neuraminyl-2,3-beta-galactosyl-1,3)-N-acetylgalactosaminide alpha-2,6-sialyltransferase 3	0	0	1	1	0	0	0	1	0	1	0
hsa-miR-181a	MIMAT0000256	NM_153182	MINA	MYC induced nuclear antigen	0	0	1	1	0	0	0	1	0	1	0
hsa-miR-181a	MIMAT0000256	NM_153186	KANK1	KN motif and ankyrin repeat domains 1	0	0	0	1	0	0	1	1	0	1	0
hsa-miR-181a	MIMAT0000256	NM_153223	CCDC100	coiled-coil domain containing 100	0	0	1	1	0	0	0	1	0	1	0
hsa-miR-181a	MIMAT0000256	NM_153332	THEX1	three prime histone mRNA exonuclease 1	0	0	1	1	0	0	0	1	0	1	0
hsa-miR-181a	MIMAT0000256	NM_153456	HS6ST3	heparan sulfate 6-O-sulfotransferase 3	0	0	1	1	0	0	0	1	0	1	0
hsa-miR-181a	MIMAT0000256	NM_153620	HOXA1	homeobox A1	0	0	1	1	0	0	0	1	0	1	0
hsa-miR-181a	MIMAT0000256	NM_153827	MINK1	misshapen-like kinase 1 (zebrafish)	0	0	1	0	0	0	1	1	0	1	0
hsa-miR-181a	MIMAT0000256	NM_153836	CREG2	cellular repressor of E1A-stimulated genes 2	0	0	1	1	0	0	0	1	0	1	0
hsa-miR-181a	MIMAT0000256	NM_170600	SH2D3C	SH2 domain containing 3C	0	0	1	0	0	0	1	1	0	1	0
hsa-miR-181a	MIMAT0000256	NM_170601	SIAE	sialic acid acetylesterase	0	0	1	1	0	0	0	1	0	1	0
hsa-miR-181a	MIMAT0000256	NM_170721	MSI2	musashi homolog 2 (Drosophila)	0	0	1	0	0	0	0	1	0	1	1
hsa-miR-181a	MIMAT0000256	NM_170774	RASSF2	Ras association (RalGDS/AF-6) domain family member 2	0	0	1	1	0	0	0	1	0	1	0
hsa-miR-181a	MIMAT0000256	NM_172058	EYA1	eyes absent homolog 1 (Drosophila)	0	0	1	0	0	0	1	1	0	1	0
hsa-miR-181a	MIMAT0000256	NM_172059	EYA1	eyes absent homolog 1 (Drosophila)	0	0	1	0	0	0	1	1	0	1	0
hsa-miR-181a	MIMAT0000256	NM_172060	EYA1	eyes absent homolog 1 (Drosophila)	0	0	1	0	0	0	1	1	0	1	0
hsa-miR-181a	MIMAT0000256	NM_172128	CAMK2D	calcium/calmodulin-dependent protein kinase (CaM kinase) II delta	0	0	1	1	0	0	0	1	0	1	0
hsa-miR-181a	MIMAT0000256	NM_172170	CAMK2G	calcium/calmodulin-dependent protein kinase (CaM kinase) II gamma	0	0	1	0	0	0	1	1	0	1	0
hsa-miR-181a	MIMAT0000256	NM_172314	IL25	interleukin 25	0	0	1	1	0	0	0	1	0	1	0
hsa-miR-181a	MIMAT0000256	NM_172316	MEIS2	Meis homeobox 2	0	0	1	0	0	0	1	1	0	1	0
hsa-miR-181a	MIMAT0000256	NM_173473	C10orf104	chromosome 10 open reading frame 104	0	0	1	1	0	0	0	1	0	1	0
hsa-miR-181a	MIMAT0000256	NM_173496	MPP7	membrane protein, palmitoylated 7 (MAGUK p55 subfamily member 7)	0	0	1	1	0	0	0	1	0	1	0
hsa-miR-181a	MIMAT0000256	NM_173510	CCDC117	coiled-coil domain containing 117	0	0	1	1	0	0	0	1	0	1	0
hsa-miR-181a	MIMAT0000256	NM_173519	RLBP1L1	retinaldehyde binding protein 1-like 1	0	0	1	1	0	0	0	1	0	1	0
hsa-miR-181a	MIMAT0000256	NM_173602	DIP2B	DIP2 disco-interacting protein 2 homolog B (Drosophila)	0	0	1	0	0	0	0	1	0	1	1
hsa-miR-181a	MIMAT0000256	NM_173814	PRTG	protogenin homolog (Gallus gallus)	0	0	0	1	0	0	0	1	0	1	1
hsa-miR-181a	MIMAT0000256	NM_173822	FAM126B	family with sequence similarity 126, member B	0	0	0	0	0	0	1	1	0	1	1
hsa-miR-181a	MIMAT0000256	NM_174890	ANUBL1	AN1, ubiquitin-like, homolog (Xenopus laevis)	0	0	1	1	0	0	0	1	0	1	0
hsa-miR-181a	MIMAT0000256	NM_175623	RAB3IP	RAB3A interacting protein (rabin3)	0	0	1	1	0	0	0	1	0	1	0
hsa-miR-181a	MIMAT0000256	NM_175624	RAB3IP	RAB3A interacting protein (rabin3)	0	0	1	1	0	0	0	1	0	1	0
hsa-miR-181a	MIMAT0000256	NM_175625	RAB3IP	RAB3A interacting protein (rabin3)	0	0	1	1	0	0	0	1	0	1	0
hsa-miR-181a	MIMAT0000256	NM_175931	CBFA2T3	core-binding factor, runt domain, alpha subunit 2; translocated to, 3	0	0	1	0	0	0	1	1	0	1	0
hsa-miR-181a	MIMAT0000256	NM_176081	TRDMT1	tRNA aspartic acid methyltransferase 1	0	0	1	1	0	0	0	1	0	1	0
hsa-miR-181a	MIMAT0000256	NM_177532	RASSF6	Ras association (RalGDS/AF-6) domain family member 6	0	0	1	1	0	0	0	1	0	1	0
hsa-miR-181a	MIMAT0000256	NM_178006	STARD13	StAR-related lipid transfer (START) domain containing 13	0	0	1	1	0	0	0	1	0	1	0
hsa-miR-181a	MIMAT0000256	NM_178007	STARD13	StAR-related lipid transfer (START) domain containing 13	0	0	1	1	0	0	0	1	0	1	0
hsa-miR-181a	MIMAT0000256	NM_178324	SPTLC1	serine palmitoyltransferase, long chain base subunit 1	0	0	1	1	0	0	0	1	0	1	0
hsa-miR-181a	MIMAT0000256	NM_178505	TMEM26	transmembrane protein 26	0	0	1	1	0	0	0	1	0	1	0
hsa-miR-181a	MIMAT0000256	NM_178585	WDFY3	WD repeat and FYVE domain containing 3	0	0	1	1	0	0	0	1	0	1	0
hsa-miR-181a	MIMAT0000256	NM_178842	LASS3	LAG1 homolog, ceramide synthase 3	0	0	1	1	0	0	0	1	0	1	0
hsa-miR-181a	MIMAT0000256	NM_181723	EFHA2	EF-hand domain family, member A2	0	0	1	1	0	0	0	1	0	1	0
hsa-miR-181a	MIMAT0000256	NM_181762	UBE2A	ubiquitin-conjugating enzyme E2A (RAD6 homolog)	0	0	1	1	0	0	0	1	0	1	0
hsa-miR-181a	MIMAT0000256	NM_181777	UBE2A	ubiquitin-conjugating enzyme E2A (RAD6 homolog)	0	0	1	1	0	0	0	1	0	1	0
hsa-miR-181a	MIMAT0000256	NM_181789	GLDN	gliomedin	0	0	1	1	0	0	0	1	0	1	0
hsa-miR-181a	MIMAT0000256	NM_181876	PPP2R2C	protein phosphatase 2 (formerly 2A), regulatory subunit B, gamma isoform	0	0	1	0	0	0	1	1	0	1	0
hsa-miR-181a	MIMAT0000256	NM_182898	CREB5	cAMP responsive element binding protein 5	0	0	1	1	0	0	0	1	0	1	0
hsa-miR-181a	MIMAT0000256	NM_182899	CREB5	cAMP responsive element binding protein 5	0	0	1	1	0	0	0	1	0	1	0
hsa-miR-181a	MIMAT0000256	NM_182931	MLL5	myeloid/lymphoid or mixed-lineage leukemia 5 (trithorax homolog, Drosophila)	0	0	1	1	0	0	0	1	0	1	0
hsa-miR-181a	MIMAT0000256	NM_182961	SYNE1	spectrin repeat containing, nuclear envelope 1	0	0	1	0	0	0	1	1	0	1	0
hsa-miR-181a	MIMAT0000256	NM_182975	ZNF326	zinc finger protein 326	0	0	1	1	0	0	0	1	0	1	0
hsa-miR-181a	MIMAT0000256	NM_183044	RNF6	ring finger protein (C3H2C3 type) 6	0	0	1	1	0	0	0	1	0	1	0
hsa-miR-181a	MIMAT0000256	NM_183376	ARRDC4	arrestin domain containing 4	0	0	1	1	0	0	0	1	0	1	0
hsa-miR-181a	MIMAT0000256	NM_194271	RNF34	ring finger protein 34	0	0	0	1	0	0	1	1	0	1	0
hsa-miR-181a	MIMAT0000256	NM_194277	FRMD7	FERM domain containing 7	0	0	1	1	0	0	0	1	0	1	0
hsa-miR-181a	MIMAT0000256	NM_194283	DNAJC21	DnaJ (Hsp40) homolog, subfamily C, member 21	0	0	1	0	0	0	1	1	0	1	0
hsa-miR-181a	MIMAT0000256	NM_194314	ZBTB41	zinc finger and BTB domain containing 41	0	0	1	0	0	0	0	1	0	1	1
hsa-miR-181a	MIMAT0000256	NM_194435	VIP	vasoactive intestinal peptide	0	0	1	1	0	0	0	1	0	1	0
hsa-miR-181a	MIMAT0000256	NM_194454	KRIT1	KRIT1, ankyrin repeat containing	0	0	1	1	0	0	0	1	0	1	0
hsa-miR-181a	MIMAT0000256	NM_194455	KRIT1	KRIT1, ankyrin repeat containing	0	0	1	1	0	0	0	1	0	1	0
hsa-miR-181a	MIMAT0000256	NM_194456	KRIT1	KRIT1, ankyrin repeat containing	0	0	1	1	0	0	0	1	0	1	0
hsa-miR-181a	MIMAT0000256	NM_197970	BOLL	bol, boule-like (Drosophila)	0	0	1	1	0	0	0	1	0	1	0
hsa-miR-181a	MIMAT0000256	NM_197978	HEMGN	hemogen	0	0	1	1	0	0	0	1	0	1	0
hsa-miR-181a	MIMAT0000256	NM_198281	GPRIN3	GPRIN family member 3	0	0	1	1	0	0	0	1	0	1	0
hsa-miR-181a	MIMAT0000256	NM_198428	BBS9	Bardet-Biedl syndrome 9	0	0	1	1	0	0	0	1	0	1	0
hsa-miR-181a	MIMAT0000256	NM_198461	LONRF2	LON peptidase N-terminal domain and ring finger 2	0	0	1	1	0	0	0	1	0	1	0
hsa-miR-181a	MIMAT0000256	NM_198479	TPRX1	tetra-peptide repeat homeobox 1	0	0	1	1	0	0	0	1	0	1	0
hsa-miR-181a	MIMAT0000256	NM_198562	C3orf62	chromosome 3 open reading frame 62	0	0	1	1	0	0	0	1	0	1	0
hsa-miR-181a	MIMAT0000256	NM_198715	PTGER3	prostaglandin E receptor 3 (subtype EP3)	0	0	1	1	0	0	0	1	0	1	0
hsa-miR-181a	MIMAT0000256	NM_198859	PRICKLE2	prickle homolog 2 (Drosophila)	0	0	1	0	0	0	0	1	0	1	1
hsa-miR-181a	MIMAT0000256	NM_199000	LHFPL3	lipoma HMGIC fusion partner-like 3	0	0	1	1	0	0	0	1	0	1	0
hsa-miR-181a	MIMAT0000256	NM_199039	KLHL5	kelch-like 5 (Drosophila)	0	0	0	1	0	0	1	1	0	1	0
hsa-miR-181a	MIMAT0000256	NM_199040	NUDT4	nudix (nucleoside diphosphate linked moiety X)-type motif 4	0	0	1	1	0	0	0	1	0	1	0
hsa-miR-181a	MIMAT0000256	NM_199054	MKNK2	MAP kinase interacting serine/threonine kinase 2	0	0	1	0	0	0	0	1	0	1	1
hsa-miR-181a	MIMAT0000256	NM_199076	CNNM2	cyclin M2	0	0	1	1	0	0	0	1	0	1	0
hsa-miR-181a	MIMAT0000256	NM_199141	CARM1	coactivator-associated arginine methyltransferase 1	0	0	0	0	0	0	1	1	0	1	1
hsa-miR-181a	MIMAT0000256	NM_199188	LARP4	La ribonucleoprotein domain family, member 4	0	0	1	1	0	0	0	1	0	1	0
hsa-miR-181a	MIMAT0000256	NM_199246	CCNG1	cyclin G1	0	0	1	1	0	0	0	1	0	1	0
hsa-miR-181a	MIMAT0000256	NM_199328	CLDN8	claudin 8	0	0	1	1	0	0	0	1	0	1	0
hsa-miR-181a	MIMAT0000256	NM_199421	SOCS4	suppressor of cytokine signaling 4	0	0	1	1	0	0	0	1	0	1	0
hsa-miR-181a	MIMAT0000256	NM_201431	RASSF6	Ras association (RalGDS/AF-6) domain family member 6	0	0	1	1	0	0	0	1	0	1	0
hsa-miR-181a	MIMAT0000256	NM_201571	CACNB2	calcium channel, voltage-dependent, beta 2 subunit	0	0	0	1	0	0	1	1	0	1	0
hsa-miR-181a	MIMAT0000256	NM_201597	CACNB2	calcium channel, voltage-dependent, beta 2 subunit	0	0	0	1	0	0	1	1	0	1	0
hsa-miR-181a	MIMAT0000256	NM_203364	CAPRIN1	cell cycle associated protein 1	0	0	1	1	0	0	0	1	0	1	0
hsa-miR-181a	MIMAT0000256	NM_203406	LOC153364	similar to metallo-beta-lactamase superfamily protein	0	0	1	1	0	0	0	1	0	1	0
hsa-miR-181a	MIMAT0000256	NM_203416	CD163	CD163 molecule	0	0	0	0	0	0	1	1	0	1	1
hsa-miR-181a	MIMAT0000256	NM_203488	ACYP1	acylphosphatase 1, erythrocyte (common) type	0	0	1	1	0	0	0	1	0	1	0
hsa-miR-181a	MIMAT0000256	NM_206854	QKI	quaking homolog, KH domain RNA binding (mouse)	0	0	1	0	0	0	0	1	0	1	1
hsa-miR-181a	MIMAT0000256	NM_206876	PPP1CB	protein phosphatase 1, catalytic subunit, beta isoform	0	0	1	0	0	0	1	1	0	1	0
hsa-miR-181a	MIMAT0000256	NM_207292	MBNL1	muscleblind-like (Drosophila)	0	0	1	1	0	0	0	1	0	1	0
hsa-miR-181a	MIMAT0000256	NM_207293	MBNL1	muscleblind-like (Drosophila)	0	0	1	1	0	0	0	1	0	1	0
hsa-miR-181a	MIMAT0000256	NM_207294	MBNL1	muscleblind-like (Drosophila)	0	0	1	1	0	0	0	1	0	1	0
hsa-miR-181a	MIMAT0000256	NM_207295	MBNL1	muscleblind-like (Drosophila)	0	0	1	1	0	0	0	1	0	1	0
hsa-miR-181a	MIMAT0000256	NM_207296	MBNL1	muscleblind-like (Drosophila)	0	0	1	1	0	0	0	1	0	1	0
hsa-miR-181a	MIMAT0000256	NM_207297	MBNL1	muscleblind-like (Drosophila)	0	0	1	1	0	0	0	1	0	1	0
hsa-miR-181a	MIMAT0000256	NM_207304	MBNL2	muscleblind-like 2 (Drosophila)	0	0	1	0	0	0	1	1	0	1	0
hsa-miR-181a	MIMAT0000256	NM_207315	CMPK2	cytidine monophosphate (UMP-CMP) kinase 2, mitochondrial	0	0	1	0	0	0	0	1	0	1	1
hsa-miR-181a	MIMAT0000256	NM_207316	TMEM207	transmembrane protein 207	0	0	1	1	0	0	0	1	0	1	0
hsa-miR-181a	MIMAT0000256	NM_207338	LCTL	lactase-like	0	0	1	1	0	0	0	1	0	1	0
hsa-miR-181a	MIMAT0000256	NM_207506	SAMD12	sterile alpha motif domain containing 12	0	0	1	1	0	0	0	1	0	1	0
hsa-miR-181a	MIMAT0000256	NM_213589	RAPH1	Ras association (RalGDS/AF-6) and pleckstrin homology domains 1	0	0	1	0	0	0	1	1	0	1	0
hsa-miR-181a	MIMAT0000256	NM_213651	SLC25A24	solute carrier family 25 (mitochondrial carrier; phosphate carrier), member 24	0	0	1	1	0	0	0	1	0	1	0
