# Supplementary material for: Astrocyte-Derived Small Extracellular Vesicles Regulate Dendritic Complexity through miR-26a-5p Activity
Source: Preprints.org preprint supplement (doi:10.20944/preprints202002.0250.v1), 2020-02-17
Supplement: Supplementary file 7 [file mirecords 19a.xls]

# "1" : interaction predicted; "0" : interaction not predicted.
miRNA ID	miRNA Acc	Refseq	Symbol	Description	diana	microinspector	miranda	mirtarget2	mitarget	nbmirtar	pictar	pita	rna22	rnahybrid	targetscan
hsa-miR-19a	MIMAT0000073	NM_000314	PTEN	phosphatase and tensin homolog (mutated in multiple advanced cancers 1)	0	0	1	1	0	1	0	1	1	1	1
hsa-miR-19a	MIMAT0000073	NM_014748	SNX17	sorting nexin 17	0	0	1	1	0	0	1	1	0	1	1
hsa-miR-19a	MIMAT0000073	NM_032505	KBTBD8	kelch repeat and BTB (POZ) domain containing 8	0	0	1	1	0	0	1	1	0	1	1
hsa-miR-19a	MIMAT0000073	NM_014810	CEP350	centrosomal protein 350kDa	0	0	1	1	0	0	1	1	0	1	1
hsa-miR-19a	MIMAT0000073	NM_002267	KPNA3	karyopherin alpha 3 (importin alpha 4)	0	0	1	1	0	0	1	1	0	1	1
hsa-miR-19a	MIMAT0000073	NM_002233	KCNA4	potassium voltage-gated channel, shaker-related subfamily, member 4	0	0	1	1	0	0	1	1	0	1	1
hsa-miR-19a	MIMAT0000073	NM_002222	ITPR1	inositol 1,4,5-triphosphate receptor, type 1	0	0	1	1	0	0	1	1	0	1	1
hsa-miR-19a	MIMAT0000073	NM_014924	KIAA0831	KIAA0831	0	0	1	1	0	0	1	1	0	1	1
hsa-miR-19a	MIMAT0000073	NM_173582	PGM2L1	phosphoglucomutase 2-like 1	0	0	1	1	0	0	1	1	0	1	1
hsa-miR-19a	MIMAT0000073	NM_032160	DSEL	dermatan sulfate epimerase-like	0	0	1	1	0	0	1	1	0	1	1
hsa-miR-19a	MIMAT0000073	NM_014991	WDFY3	WD repeat and FYVE domain containing 3	0	0	1	1	0	0	1	1	0	1	1
hsa-miR-19a	MIMAT0000073	NM_002518	NPAS2	neuronal PAS domain protein 2	0	0	1	1	0	0	1	1	0	1	1
hsa-miR-19a	MIMAT0000073	NM_002841	PTPRG	protein tyrosine phosphatase, receptor type, G	0	0	1	1	0	0	1	1	0	1	1
hsa-miR-19a	MIMAT0000073	NM_014382	ATP2C1	ATPase, Ca++ transporting, type 2C, member 1	0	0	1	1	0	0	1	1	0	1	1
hsa-miR-19a	MIMAT0000073	NM_003185	TAF4	TAF4 RNA polymerase II, TATA box binding protein (TBP)-associated factor, 135kDa	0	0	1	1	0	0	1	1	0	1	1
hsa-miR-19a	MIMAT0000073	NM_153690	FAM43A	family with sequence similarity 43, member A	0	0	1	1	0	0	1	1	0	1	1
hsa-miR-19a	MIMAT0000073	NM_003107	SOX4	SRY (sex determining region Y)-box 4	0	0	1	1	0	0	1	1	0	1	1
hsa-miR-19a	MIMAT0000073	NM_003070	SMARCA2	SWI/SNF related, matrix associated, actin dependent regulator of chromatin, subfamily a, member 2	0	0	1	1	0	0	1	1	0	1	1
hsa-miR-19a	MIMAT0000073	NM_153702	ELMOD2	ELMO/CED-12 domain containing 2	0	0	1	1	0	0	1	1	0	1	1
hsa-miR-19a	MIMAT0000073	NM_013433	TNPO2	transportin 2 (importin 3, karyopherin beta 2b)	0	0	1	1	0	0	1	1	0	1	1
hsa-miR-19a	MIMAT0000073	NM_002956	CLIP1	CAP-GLY domain containing linker protein 1	0	0	1	1	0	0	1	1	0	1	1
hsa-miR-19a	MIMAT0000073	NM_002897	RBMS1	RNA binding motif, single stranded interacting protein 1	0	0	1	1	0	0	1	1	0	1	1
hsa-miR-19a	MIMAT0000073	NM_014372	RNF11	ring finger protein 11	0	0	1	1	0	0	1	1	0	1	1
hsa-miR-19a	MIMAT0000073	NM_002880	RAF1	v-raf-1 murine leukemia viral oncogene homolog 1	0	0	1	1	0	0	1	1	0	1	1
hsa-miR-19a	MIMAT0000073	NM_002024	FMR1	fragile X mental retardation 1	0	0	1	1	0	0	1	1	0	1	1
hsa-miR-19a	MIMAT0000073	NM_015017	USP33	ubiquitin specific peptidase 33	0	0	1	1	0	0	1	1	0	1	1
hsa-miR-19a	MIMAT0000073	NM_015049	TRAK2	trafficking protein, kinesin binding 2	0	0	1	1	0	0	1	1	0	1	1
hsa-miR-19a	MIMAT0000073	NM_001156	ANXA7	annexin A7	0	0	1	1	0	0	1	1	0	1	1
hsa-miR-19a	MIMAT0000073	NM_001092	ABR	active BCR-related gene	0	0	1	1	0	0	1	1	0	1	1
hsa-miR-19a	MIMAT0000073	NM_001083	PDE5A	phosphodiesterase 5A, cGMP-specific	0	0	1	1	0	0	1	1	0	1	1
hsa-miR-19a	MIMAT0000073	NM_032961	PCDH10	protocadherin 10	0	0	1	1	0	0	1	1	0	1	1
hsa-miR-19a	MIMAT0000073	NM_015955	MEMO1	mediator of cell motility 1	0	0	1	1	0	0	1	1	0	1	1
hsa-miR-19a	MIMAT0000073	NM_016530	RAB8B	RAB8B, member RAS oncogene family	0	0	1	1	0	0	1	1	0	1	1
hsa-miR-19a	MIMAT0000073	NM_015995	KLF13	Kruppel-like factor 13	0	0	1	1	0	0	1	1	0	1	1
hsa-miR-19a	MIMAT0000073	NM_016258	YTHDF2	YTH domain family, member 2	0	0	1	1	0	0	1	1	0	1	1
hsa-miR-19a	MIMAT0000073	NM_016315	GULP1	GULP, engulfment adaptor PTB domain containing 1	0	0	1	1	0	0	1	1	0	1	1
hsa-miR-19a	MIMAT0000073	NM_025187	C16orf70	chromosome 16 open reading frame 70	0	0	1	1	0	0	1	1	0	1	1
hsa-miR-19a	MIMAT0000073	NM_001204	BMPR2	bone morphogenetic protein receptor, type II (serine/threonine kinase)	0	0	1	1	0	0	1	1	0	1	1
hsa-miR-19a	MIMAT0000073	NM_030962	SBF2	SET binding factor 2	0	0	1	1	0	0	1	1	0	1	1
hsa-miR-19a	MIMAT0000073	NM_032039	ITFG3	integrin alpha FG-GAP repeat containing 3	0	0	1	1	0	0	1	1	0	1	1
hsa-miR-19a	MIMAT0000073	NM_006352	ZNF238	zinc finger protein 238	0	0	1	1	0	0	1	1	0	1	1
hsa-miR-19a	MIMAT0000073	NM_001759	CCND2	cyclin D2	0	0	1	1	0	0	1	1	0	1	1
hsa-miR-19a	MIMAT0000073	NM_015170	SULF1	sulfatase 1	0	0	1	1	0	0	1	1	0	1	1
hsa-miR-19a	MIMAT0000073	NM_001693	ATP6V1B2	ATPase, H+ transporting, lysosomal 56/58kDa, V1 subunit B2	0	0	1	1	0	0	1	1	0	1	1
hsa-miR-19a	MIMAT0000073	NM_001584	MPPED2	metallophosphoesterase domain containing 2	0	0	1	1	0	0	1	1	0	1	1
hsa-miR-19a	MIMAT0000073	NM_001452	FOXF2	forkhead box F2	0	0	1	1	0	0	1	1	0	1	1
hsa-miR-19a	MIMAT0000073	NM_001390	DTNA	dystrobrevin, alpha	0	0	1	1	0	0	1	1	0	1	1
hsa-miR-19a	MIMAT0000073	NM_001304	CPD	carboxypeptidase D	0	0	1	1	0	0	1	1	0	1	1
hsa-miR-19a	MIMAT0000073	NM_015447	CAMSAP1	calmodulin regulated spectrin-associated protein 1	0	0	1	1	0	0	1	1	0	1	1
hsa-miR-19a	MIMAT0000073	NM_016472	C14orf129	chromosome 14 open reading frame 129	0	0	1	1	0	0	1	1	0	1	1
hsa-miR-19a	MIMAT0000073	NM_033211	C5orf30	chromosome 5 open reading frame 30	0	0	1	1	0	0	1	1	0	1	1
hsa-miR-19a	MIMAT0000073	NM_139014	MAPK14	mitogen-activated protein kinase 14	0	0	1	1	0	0	1	1	0	1	1
hsa-miR-19a	MIMAT0000073	NM_005935	AFF1	AF4/FMR2 family, member 1	0	0	1	1	0	0	1	1	0	1	1
hsa-miR-19a	MIMAT0000073	NM_006246	PPP2R5E	protein phosphatase 2, regulatory subunit B", epsilon isoform	0	0	1	1	0	0	1	1	0	1	1
hsa-miR-19a	MIMAT0000073	NM_004571	PKNOX1	PBX/knotted 1 homeobox 1	0	0	1	1	0	0	1	1	0	1	1
hsa-miR-19a	MIMAT0000073	NM_006251	PRKAA1	protein kinase, AMP-activated, alpha 1 catalytic subunit	0	0	1	1	0	0	1	1	0	1	1
hsa-miR-19a	MIMAT0000073	NM_004525	LRP2	low density lipoprotein-related protein 2	0	0	1	1	0	0	1	1	0	1	1
hsa-miR-19a	MIMAT0000073	NM_004505	USP6	ubiquitin specific peptidase 6 (Tre-2 oncogene)	0	0	1	1	0	0	1	1	0	1	1
hsa-miR-19a	MIMAT0000073	NM_004458	ACSL4	acyl-CoA synthetase long-chain family member 4	0	0	1	1	0	0	1	1	0	1	1
hsa-miR-19a	MIMAT0000073	NM_152271	LONRF1	LON peptidase N-terminal domain and ring finger 1	0	0	1	1	0	0	1	1	0	1	1
hsa-miR-19a	MIMAT0000073	NM_006421	ARFGEF1	ADP-ribosylation factor guanine nucleotide-exchange factor 1(brefeldin A-inhibited)	0	0	1	1	0	0	1	1	0	1	1
hsa-miR-19a	MIMAT0000073	NM_006464	TGOLN2	trans-golgi network protein 2	0	0	1	1	0	0	1	1	0	1	1
hsa-miR-19a	MIMAT0000073	NM_004859	CLTC	clathrin, heavy chain (Hc)	0	0	1	1	0	0	1	1	0	1	1
hsa-miR-19a	MIMAT0000073	NM_004869	VPS4B	vacuolar protein sorting 4 homolog B (S. cerevisiae)	0	0	1	1	0	0	1	1	0	1	1
hsa-miR-19a	MIMAT0000073	NM_144599	NIPA1	non imprinted in Prader-Willi/Angelman syndrome 1	0	0	1	1	0	0	1	1	0	1	1
hsa-miR-19a	MIMAT0000073	NM_005230	ELK3	ELK3, ETS-domain protein (SRF accessory protein 2)	0	0	1	1	0	0	1	1	0	1	1
hsa-miR-19a	MIMAT0000073	NM_005178	BCL3	B-cell CLL/lymphoma 3	0	0	1	1	0	0	1	1	0	1	1
hsa-miR-19a	MIMAT0000073	NM_005578	LPP	LIM domain containing preferred translocation partner in lipoma	0	0	1	1	0	0	1	1	0	1	1
hsa-miR-19a	MIMAT0000073	NM_144720	JAKMIP1	janus kinase and microtubule interacting protein 1	0	0	1	1	0	0	1	1	0	1	1
hsa-miR-19a	MIMAT0000073	NM_005112	WDR1	WD repeat domain 1	0	0	1	1	0	0	1	1	0	1	1
hsa-miR-19a	MIMAT0000073	NM_004992	MECP2	methyl CpG binding protein 2 (Rett syndrome)	0	0	1	1	0	0	1	1	0	1	1
hsa-miR-19a	MIMAT0000073	NM_138771	CCDC126	coiled-coil domain containing 126	0	0	1	1	0	0	1	1	0	1	1
hsa-miR-19a	MIMAT0000073	NM_144778	MBNL2	muscleblind-like 2 (Drosophila)	0	0	1	1	0	0	1	1	0	1	1
hsa-miR-19a	MIMAT0000073	NM_005639	SYT1	synaptotagmin I	0	0	1	1	0	0	1	1	0	1	1
hsa-miR-19a	MIMAT0000073	NM_006469	IVNS1ABP	influenza virus NS1A binding protein	0	0	1	1	0	0	1	1	0	1	1
hsa-miR-19a	MIMAT0000073	NM_006526	ZNF217	zinc finger protein 217	0	0	1	1	0	0	1	1	0	1	1
hsa-miR-19a	MIMAT0000073	NM_152415	VPS37A	vacuolar protein sorting 37 homolog A (S. cerevisiae)	0	0	1	1	0	0	1	1	0	1	1
hsa-miR-19a	MIMAT0000073	NM_052897	MBD6	methyl-CpG binding domain protein 6	0	0	1	1	0	0	1	1	0	1	1
hsa-miR-19a	MIMAT0000073	NM_003896	ST3GAL5	ST3 beta-galactoside alpha-2,3-sialyltransferase 5	0	0	1	1	0	0	1	1	0	1	1
hsa-miR-19a	MIMAT0000073	NM_012081	ELL2	elongation factor, RNA polymerase II, 2	0	0	1	1	0	0	1	1	0	1	1
hsa-miR-19a	MIMAT0000073	NM_005502	ABCA1	ATP-binding cassette, sub-family A (ABC1), member 1	0	0	1	1	0	0	1	1	0	1	1
hsa-miR-19a	MIMAT0000073	NM_003654	CHST1	carbohydrate (keratan sulfate Gal-6) sulfotransferase 1	0	0	1	1	0	0	1	1	0	1	1
hsa-miR-19a	MIMAT0000073	NM_003629	PIK3R3	phosphoinositide-3-kinase, regulatory subunit 3 (gamma)	0	0	1	1	0	0	1	1	0	1	1
hsa-miR-19a	MIMAT0000073	NM_012342	BAMBI	BMP and activin membrane-bound inhibitor homolog (Xenopus laevis)	0	0	1	1	0	0	1	1	0	1	1
hsa-miR-19a	MIMAT0000073	NM_003272	GPR137B	G protein-coupled receptor 137B	0	0	1	1	0	0	1	1	0	1	1
hsa-miR-19a	MIMAT0000073	NM_033225	CSMD1	CUB and Sushi multiple domains 1	0	0	1	1	0	0	1	1	0	1	1
hsa-miR-19a	MIMAT0000073	NM_003245	TGM3	transglutaminase 3 (E polypeptide, protein-glutamine-gamma-glutamyltransferase)	0	0	1	1	0	0	1	1	0	1	1
hsa-miR-19a	MIMAT0000073	NM_007106	UBL3	ubiquitin-like 3	0	0	1	1	0	0	1	1	0	1	1
hsa-miR-19a	MIMAT0000073	NM_003955	SOCS3	suppressor of cytokine signaling 3	0	0	1	1	0	0	1	1	0	1	1
hsa-miR-19a	MIMAT0000073	NM_006544	EXOC5	exocyst complex component 5	0	0	1	1	0	0	1	1	0	1	1
hsa-miR-19a	MIMAT0000073	NM_004299	ABCB7	ATP-binding cassette, sub-family B (MDR/TAP), member 7	0	0	1	1	0	0	1	1	0	1	1
hsa-miR-19a	MIMAT0000073	NM_004293	GDA	guanine deaminase	0	0	1	1	0	0	1	1	0	1	1
hsa-miR-19a	MIMAT0000073	NM_080836	STK35	serine/threonine kinase 35	0	0	1	1	0	0	1	1	0	1	1
hsa-miR-19a	MIMAT0000073	NM_006624	ZMYND11	zinc finger, MYND domain containing 11	0	0	1	1	0	0	1	1	0	1	1
hsa-miR-19a	MIMAT0000073	NM_006813	PNRC1	proline-rich nuclear receptor coactivator 1	0	0	1	1	0	0	1	1	0	1	1
hsa-miR-19a	MIMAT0000073	NM_007023	RAPGEF4	Rap guanine nucleotide exchange factor (GEF) 4	0	0	1	1	0	0	1	1	0	1	1
hsa-miR-19a	MIMAT0000073	NM_004040	RHOB	ras homolog gene family, member B	0	0	1	1	0	0	1	1	0	1	1
hsa-miR-19a	MIMAT0000073	NM_007054	KIF3A	kinesin family member 3A	0	0	1	1	0	0	1	1	0	1	1
hsa-miR-19a	MIMAT0000073	NM_003972	BTAF1	BTAF1 RNA polymerase II, B-TFIID transcription factor-associated, 170kDa (Mot1 homolog, S. cerevisiae)	0	0	1	1	0	0	1	1	0	1	1
hsa-miR-19a	MIMAT0000073	NM_003244	TGIF1	TGFB-induced factor homeobox 1	0	0	1	1	0	0	1	1	0	1	1
hsa-miR-19a	MIMAT0000073	NM_020182	PMEPA1	prostate transmembrane protein, androgen induced 1	0	0	1	1	0	0	1	1	0	1	1
hsa-miR-19a	MIMAT0000073	NM_019613	WDR45L	WDR45-like	0	0	1	1	0	0	1	1	0	1	1
hsa-miR-19a	MIMAT0000073	NM_017786	GOLSYN	Golgi-localized protein	0	0	1	1	0	0	1	1	0	1	1
hsa-miR-19a	MIMAT0000073	NM_000891	KCNJ2	potassium inwardly-rectifying channel, subfamily J, member 2	0	0	1	1	0	0	1	1	0	1	1
hsa-miR-19a	MIMAT0000073	NM_022138	SMOC2	SPARC related modular calcium binding 2	0	0	1	1	0	0	1	1	0	1	1
hsa-miR-19a	MIMAT0000073	NM_018263	ASXL2	additional sex combs like 2 (Drosophila)	0	0	1	1	0	0	1	1	0	1	1
hsa-miR-19a	MIMAT0000073	NM_017778	WHSC1L1	Wolf-Hirschhorn syndrome candidate 1-like 1	0	0	1	1	0	0	1	1	0	1	1
hsa-miR-19a	MIMAT0000073	NM_018907	PCDHA4	protocadherin alpha 4	0	0	1	1	0	0	1	1	0	1	1
hsa-miR-19a	MIMAT0000073	NM_020801	ARRDC3	arrestin domain containing 3	0	0	1	1	0	0	1	1	0	1	1
hsa-miR-19a	MIMAT0000073	NM_206854	QKI	quaking homolog, KH domain RNA binding (mouse)	0	0	1	1	0	0	1	1	0	1	1
hsa-miR-19a	MIMAT0000073	NM_022080	NAPB	N-ethylmaleimide-sensitive factor attachment protein, beta	0	0	1	1	0	0	1	1	0	1	1
hsa-miR-19a	MIMAT0000073	NM_020856	TSHZ3	teashirt zinc finger homeobox 3	0	0	1	1	0	0	1	1	0	1	1
hsa-miR-19a	MIMAT0000073	NM_024490	ATP10A	ATPase, class V, type 10A	0	0	1	1	0	0	1	1	0	1	1
hsa-miR-19a	MIMAT0000073	NM_021252	RAB18	RAB18, member RAS oncogene family	0	0	1	1	0	0	1	1	0	1	1
hsa-miR-19a	MIMAT0000073	NM_018900	PCDHA1	protocadherin alpha 1	0	0	1	1	0	0	1	1	0	1	1
hsa-miR-19a	MIMAT0000073	NM_017974	ATG16L1	ATG16 autophagy related 16-like 1 (S. cerevisiae)	0	0	1	1	0	0	1	1	0	1	1
hsa-miR-19a	MIMAT0000073	NM_001002243	AFTPH	aftiphilin	0	0	1	1	0	0	1	1	0	1	1
hsa-miR-19a	MIMAT0000073	NM_001001928	PPARA	peroxisome proliferator-activated receptor alpha	0	0	1	1	0	0	1	1	0	1	1
hsa-miR-19a	MIMAT0000073	NM_001002860	BTBD7	BTB (POZ) domain containing 7	0	0	1	1	0	0	1	1	0	1	1
hsa-miR-19a	MIMAT0000073	NM_018043	TMEM16A	transmembrane protein 16A	0	0	1	1	0	0	1	1	0	1	1
hsa-miR-19a	MIMAT0000073	NM_017880	C2orf42	chromosome 2 open reading frame 42	0	0	1	1	0	0	1	1	0	1	1
hsa-miR-19a	MIMAT0000073	NM_020307	CCNL1	cyclin L1	0	0	1	1	0	0	1	1	0	1	1
hsa-miR-19a	MIMAT0000073	NM_018084	CCDC88A	coiled-coil domain containing 88A	0	0	1	1	0	0	1	1	0	1	1
hsa-miR-19a	MIMAT0000073	NM_020168	PAK6	p21 protein (Cdc42/Rac)-activated kinase 6	0	0	1	1	0	0	1	1	0	1	1
hsa-miR-19a	MIMAT0000073	NM_024680	E2F8	E2F transcription factor 8	0	0	1	1	0	0	1	1	0	1	1
hsa-miR-19a	MIMAT0000073	NM_017789	SEMA4C	sema domain, immunoglobulin domain (Ig), transmembrane domain (TM) and short cytoplasmic domain, (semaphorin) 4C	0	0	1	1	0	0	1	1	0	1	1
hsa-miR-19a	MIMAT0000073	NM_020689	SLC24A3	solute carrier family 24 (sodium/potassium/calcium exchanger), member 3	0	0	1	1	0	0	1	1	0	1	1
hsa-miR-19a	MIMAT0000073	NM_024692	CLIP4	CAP-GLY domain containing linker protein family, member 4	0	0	1	1	0	0	1	1	0	1	1
hsa-miR-19a	MIMAT0000073	NM_022374	ARL6IP2	ADP-ribosylation factor-like 6 interacting protein 2	0	0	1	1	0	0	1	1	0	1	1
hsa-miR-19a	MIMAT0000073	NM_021572	ENPP5	ectonucleotide pyrophosphatase/phosphodiesterase 5 (putative function)	0	0	1	1	0	0	1	1	0	1	1
hsa-miR-19a	MIMAT0000073	NM_018909	PCDHA6	protocadherin alpha 6	0	0	1	1	0	0	1	1	0	1	1
hsa-miR-19a	MIMAT0000073	NM_207371	C10orf140	chromosome 10 open reading frame 140	0	0	1	1	0	0	1	1	0	1	1
hsa-miR-19a	MIMAT0000073	NM_000332	ATXN1	ataxin 1	0	0	1	1	0	0	1	1	0	1	1
hsa-miR-19a	MIMAT0000073	NM_018901	PCDHA10	protocadherin alpha 10	0	0	1	1	0	0	1	1	0	1	1
hsa-miR-19a	MIMAT0000073	NM_018999	KIAA1128	KIAA1128	0	0	1	1	0	0	1	1	0	1	1
hsa-miR-19a	MIMAT0000073	NM_017610	RNF111	ring finger protein 111	0	0	1	1	0	0	1	1	0	1	1
hsa-miR-19a	MIMAT0000073	NM_183376	ARRDC4	arrestin domain containing 4	0	0	1	1	0	0	1	1	0	1	1
hsa-miR-19a	MIMAT0000073	NM_018908	PCDHA5	protocadherin alpha 5	0	0	1	1	0	0	1	1	0	1	1
hsa-miR-19a	MIMAT0000073	NM_022037	TIA1	TIA1 cytotoxic granule-associated RNA binding protein	0	0	1	1	0	0	1	1	0	1	1
hsa-miR-19a	MIMAT0000073	NM_018905	PCDHA2	protocadherin alpha 2	0	0	1	1	0	0	1	1	0	1	1
hsa-miR-19a	MIMAT0000073	NM_000165	GJA1	gap junction protein, alpha 1, 43kDa	0	0	1	1	0	0	1	1	0	1	1
hsa-miR-19a	MIMAT0000073	NM_018906	PCDHA3	protocadherin alpha 3	0	0	1	1	0	0	1	1	0	1	1
hsa-miR-19a	MIMAT0000073	NM_198859	PRICKLE2	prickle homolog 2 (Drosophila)	0	0	1	1	0	0	1	1	0	1	1
hsa-miR-19a	MIMAT0000073	NM_000125	ESR1	estrogen receptor 1	0	0	1	1	0	0	1	1	0	1	1
hsa-miR-19a	MIMAT0000073	NM_022782	MPHOSPH9	M-phase phosphoprotein 9	0	0	0	1	0	0	1	1	0	1	1
hsa-miR-19a	MIMAT0000073	NM_022845	CBFB	core-binding factor, beta subunit	0	0	1	1	0	0	1	1	0	1	0
hsa-miR-19a	MIMAT0000073	NM_052832	SLC26A7	solute carrier family 26, member 7	0	0	1	0	0	0	1	1	0	1	1
hsa-miR-19a	MIMAT0000073	NM_033437	PDE5A	phosphodiesterase 5A, cGMP-specific	0	0	1	1	0	0	1	1	0	1	0
hsa-miR-19a	MIMAT0000073	NM_007212	RNF2	ring finger protein 2	0	0	1	0	0	0	1	1	0	1	1
hsa-miR-19a	MIMAT0000073	NM_020782	KLHDC5	kelch domain containing 5	0	0	1	1	0	0	0	1	0	1	1
hsa-miR-19a	MIMAT0000073	NM_018910	PCDHA7	protocadherin alpha 7	0	0	0	1	0	0	1	1	0	1	1
hsa-miR-19a	MIMAT0000073	NM_033430	PDE5A	phosphodiesterase 5A, cGMP-specific	0	0	1	1	0	0	1	1	0	1	0
hsa-miR-19a	MIMAT0000073	NM_020177	FEM1C	fem-1 homolog c (C. elegans)	0	0	1	0	0	0	1	1	0	1	1
hsa-miR-19a	MIMAT0000073	NM_012082	ZFPM2	zinc finger protein, multitype 2	0	0	0	1	0	0	1	1	0	1	1
hsa-miR-19a	MIMAT0000073	NM_012180	FBXO8	F-box protein 8	0	0	0	1	0	0	1	1	0	1	1
hsa-miR-19a	MIMAT0000073	NM_022781	RNF38	ring finger protein 38	0	0	0	1	0	0	1	1	0	1	1
hsa-miR-19a	MIMAT0000073	NM_019080	NDFIP2	Nedd4 family interacting protein 2	0	0	1	1	0	0	0	1	0	1	1
hsa-miR-19a	MIMAT0000073	NM_012199	EIF2C1	eukaryotic translation initiation factor 2C, 1	0	0	1	0	0	0	1	1	0	1	1
hsa-miR-19a	MIMAT0000073	NM_012309	SHANK2	SH3 and multiple ankyrin repeat domains 2	0	0	1	0	0	0	1	1	0	1	1
hsa-miR-19a	MIMAT0000073	NM_012257	HBP1	HMG-box transcription factor 1	0	0	1	1	0	0	1	1	0	0	1
hsa-miR-19a	MIMAT0000073	NM_012293	PXDN	peroxidasin homolog (Drosophila)	0	0	1	1	0	0	0	1	0	1	1
hsa-miR-19a	MIMAT0000073	NM_012297	G3BP2	GTPase activating protein (SH3 domain) binding protein 2	0	0	1	0	0	0	1	1	0	1	1
hsa-miR-19a	MIMAT0000073	NM_012448	STAT5B	signal transducer and activator of transcription 5B	0	0	1	0	0	0	1	1	0	1	1
hsa-miR-19a	MIMAT0000073	NM_033285	TP53INP1	tumor protein p53 inducible nuclear protein 1	0	0	1	0	0	0	1	1	0	1	1
hsa-miR-19a	MIMAT0000073	NM_018993	RIN2	Ras and Rab interactor 2	0	0	0	1	0	0	1	1	0	1	1
hsa-miR-19a	MIMAT0000073	NM_012302	LPHN2	latrophilin 2	0	0	1	0	0	0	1	1	0	1	1
hsa-miR-19a	MIMAT0000073	NM_013254	TBK1	TANK-binding kinase 1	0	0	1	0	0	0	1	1	0	1	1
hsa-miR-19a	MIMAT0000073	NM_012090	MACF1	microtubule-actin crosslinking factor 1	0	0	0	1	0	0	1	1	0	1	1
hsa-miR-19a	MIMAT0000073	NM_013233	STK39	serine threonine kinase 39 (STE20/SPS1 homolog, yeast)	0	0	1	0	0	0	1	1	0	1	1
hsa-miR-19a	MIMAT0000073	NM_012104	BACE1	beta-site APP-cleaving enzyme 1	0	0	1	0	0	0	1	1	0	1	1
hsa-miR-19a	MIMAT0000073	NM_012478	WBP2	WW domain binding protein 2	0	0	1	0	0	0	1	1	0	1	1
hsa-miR-19a	MIMAT0000073	NM_019593	RP5-1022P6.2	hypothetical protein KIAA1434	0	0	1	0	0	0	1	1	0	1	1
hsa-miR-19a	MIMAT0000073	NM_012301	MAGI2	membrane associated guanylate kinase, WW and PDZ domain containing 2	0	0	1	0	0	0	1	1	0	1	1
hsa-miR-19a	MIMAT0000073	NM_007084	SOX21	SRY (sex determining region Y)-box 21	0	0	1	0	0	0	1	1	0	1	1
hsa-miR-19a	MIMAT0000073	NM_153207	AEBP2	AE binding protein 2	0	0	1	0	0	0	1	1	0	1	1
hsa-miR-19a	MIMAT0000073	NM_021814	ELOVL5	ELOVL family member 5, elongation of long chain fatty acids (FEN1/Elo2, SUR4/Elo3-like, yeast)	0	0	0	1	0	0	1	1	0	1	1
hsa-miR-19a	MIMAT0000073	NM_021962	ABR	active BCR-related gene	0	0	1	1	0	0	1	1	0	1	0
hsa-miR-19a	MIMAT0000073	NM_005761	PLXNC1	plexin C1	0	0	1	0	0	0	1	1	0	1	1
hsa-miR-19a	MIMAT0000073	NM_138389	FAM114A1	family with sequence similarity 114, member A1	0	0	0	1	0	0	1	1	0	1	1
hsa-miR-19a	MIMAT0000073	NM_006016	CD164	CD164 molecule, sialomucin	0	0	1	0	0	0	1	1	0	1	1
hsa-miR-19a	MIMAT0000073	NM_006037	HDAC4	histone deacetylase 4	0	0	1	0	0	0	1	1	0	1	1
hsa-miR-19a	MIMAT0000073	NM_006038	SPATA2	spermatogenesis associated 2	0	0	1	0	0	0	1	1	0	1	1
hsa-miR-19a	MIMAT0000073	NM_006058	TNIP1	TNFAIP3 interacting protein 1	0	0	1	0	0	0	1	1	0	1	1
hsa-miR-19a	MIMAT0000073	NM_006094	DLC1	deleted in liver cancer 1	0	0	1	0	0	0	1	1	0	1	1
hsa-miR-19a	MIMAT0000073	NM_005668	ST8SIA4	ST8 alpha-N-acetyl-neuraminide alpha-2,8-sialyltransferase 4	0	0	1	0	0	0	1	1	0	1	1
hsa-miR-19a	MIMAT0000073	NM_005655	KLF10	Kruppel-like factor 10	0	0	1	1	0	0	1	1	0	1	0
hsa-miR-19a	MIMAT0000073	NM_021097	SLC8A1	solute carrier family 8 (sodium/calcium exchanger), member 1	0	0	1	1	0	0	0	1	0	1	1
hsa-miR-19a	MIMAT0000073	NM_017842	FLJ20489	hypothetical protein FLJ20489	0	0	1	0	0	0	1	1	0	1	1
hsa-miR-19a	MIMAT0000073	NM_139012	MAPK14	mitogen-activated protein kinase 14	0	0	1	1	0	0	1	1	0	1	0
hsa-miR-19a	MIMAT0000073	NM_021183	RAP2C	RAP2C, member of RAS oncogene family	0	0	0	1	0	0	1	1	0	1	1
hsa-miR-19a	MIMAT0000073	NM_021136	RTN1	reticulon 1	0	0	0	1	0	0	1	1	0	1	1
hsa-miR-19a	MIMAT0000073	NM_005596	NFIB	nuclear factor I/B	0	0	1	1	0	0	0	1	0	1	1
hsa-miR-19a	MIMAT0000073	NM_005604	POU3F2	POU class 3 homeobox 2	0	0	1	0	0	0	1	1	0	1	1
hsa-miR-19a	MIMAT0000073	NM_021785	RAI2	retinoic acid induced 2	0	0	1	0	0	0	1	1	0	1	1
hsa-miR-19a	MIMAT0000073	NM_021116	ADCY1	adenylate cyclase 1 (brain)	0	0	1	0	0	0	1	1	0	1	1
hsa-miR-19a	MIMAT0000073	NM_005629	SLC6A8	solute carrier family 6 (neurotransmitter transporter, creatine), member 8	0	0	1	1	0	0	0	1	0	1	1
hsa-miR-19a	MIMAT0000073	NM_006145	DNAJB1	DnaJ (Hsp40) homolog, subfamily B, member 1	0	0	1	1	0	0	0	1	0	1	1
hsa-miR-19a	MIMAT0000073	NM_138288	C14orf147	chromosome 14 open reading frame 147	0	0	1	0	0	0	1	1	0	1	1
hsa-miR-19a	MIMAT0000073	NM_020899	ZBTB4	zinc finger and BTB domain containing 4	0	0	1	0	0	0	1	1	0	1	1
hsa-miR-19a	MIMAT0000073	NM_020443	NAV1	neuron navigator 1	0	0	1	0	0	0	1	1	0	1	1
hsa-miR-19a	MIMAT0000073	NM_020432	PHTF2	putative homeodomain transcription factor 2	0	0	0	1	0	0	1	1	0	1	1
hsa-miR-19a	MIMAT0000073	NM_139045	SMARCA2	SWI/SNF related, matrix associated, actin dependent regulator of chromatin, subfamily a, member 2	0	0	1	1	0	0	1	1	0	1	0
hsa-miR-19a	MIMAT0000073	NM_006628	ARPP-19	cyclic AMP phosphoprotein, 19 kD	0	0	1	0	0	0	1	1	0	1	1
hsa-miR-19a	MIMAT0000073	NM_080738	EDARADD	EDAR-associated death domain	0	0	1	1	0	0	0	1	0	1	1
hsa-miR-19a	MIMAT0000073	NM_006807	CBX1	chromobox homolog 1 (HP1 beta homolog Drosophila )	0	0	1	0	0	0	1	1	0	1	1
hsa-miR-19a	MIMAT0000073	NM_006888	CALM1	calmodulin 1 (phosphorylase kinase, delta)	0	0	1	1	0	0	0	1	0	1	1
hsa-miR-19a	MIMAT0000073	NM_006940	SOX5	SRY (sex determining region Y)-box 5	0	0	1	0	0	0	1	1	0	1	1
hsa-miR-19a	MIMAT0000073	NM_007039	PTPN21	protein tyrosine phosphatase, non-receptor type 21	0	0	1	0	0	0	1	1	0	1	1
hsa-miR-19a	MIMAT0000073	NM_080881	DBN1	drebrin 1	0	0	1	1	0	0	1	1	0	1	0
hsa-miR-19a	MIMAT0000073	NM_022173	TIA1	TIA1 cytotoxic granule-associated RNA binding protein	0	0	1	1	0	0	1	1	0	1	0
hsa-miR-19a	MIMAT0000073	NM_020739	CCPG1	cell cycle progression 1	0	0	1	1	0	0	1	1	0	1	0
hsa-miR-19a	MIMAT0000073	NM_020871	LRCH2	leucine-rich repeats and calponin homology (CH) domain containing 2	0	0	1	0	0	0	1	1	0	1	1
hsa-miR-19a	MIMAT0000073	NM_020845	PITPNM2	phosphatidylinositol transfer protein, membrane-associated 2	0	0	1	0	0	0	1	1	0	1	1
hsa-miR-19a	MIMAT0000073	NM_006275	SFRS6	splicing factor, arginine/serine-rich 6	0	0	1	0	0	0	1	1	0	1	1
hsa-miR-19a	MIMAT0000073	NM_006321	ARIH2	ariadne homolog 2 (Drosophila)	0	0	1	0	0	0	1	1	0	1	1
hsa-miR-19a	MIMAT0000073	NM_133468	BMPER	BMP binding endothelial regulator	0	0	1	0	0	0	1	1	0	1	1
hsa-miR-19a	MIMAT0000073	NM_031860	PCDHA10	protocadherin alpha 10	0	0	1	1	0	0	1	1	0	1	0
hsa-miR-19a	MIMAT0000073	NM_006359	SLC9A6	solute carrier family 9 (sodium/hydrogen exchanger), member 6	0	0	1	1	0	0	1	1	0	1	0
hsa-miR-19a	MIMAT0000073	NM_022137	SMOC1	SPARC related modular calcium binding 1	0	0	1	1	0	0	1	1	0	1	0
hsa-miR-19a	MIMAT0000073	NM_020770	CGN	cingulin	0	0	1	0	0	0	1	1	0	1	1
hsa-miR-19a	MIMAT0000073	NM_022574	GIGYF1	GRB10 interacting GYF protein 1	0	0	1	1	0	0	0	1	0	1	1
hsa-miR-19a	MIMAT0000073	NM_015193	ARC	activity-regulated cytoskeleton-associated protein	0	0	0	1	0	0	1	1	0	1	1
hsa-miR-19a	MIMAT0000073	NM_015396	ARMC8	armadillo repeat containing 8	0	0	1	1	0	0	1	1	0	1	0
hsa-miR-19a	MIMAT0000073	NM_017753	RP11-35N6.1	plasticity related gene 3	0	0	0	1	0	0	1	1	0	1	1
hsa-miR-19a	MIMAT0000073	NM_017740	ZDHHC7	zinc finger, DHHC-type containing 7	0	0	1	0	0	0	1	1	0	1	1
hsa-miR-19a	MIMAT0000073	NM_015455	CNOT6	CCR4-NOT transcription complex, subunit 6	0	0	1	0	0	0	1	1	0	1	1
hsa-miR-19a	MIMAT0000073	NM_017721	CC2D1A	coiled-coil and C2 domain containing 1A	0	0	1	0	0	0	1	1	0	1	1
hsa-miR-19a	MIMAT0000073	NM_017709	FAM46C	family with sequence similarity 46, member C	0	0	1	0	0	0	1	1	0	1	1
hsa-miR-19a	MIMAT0000073	NM_030919	FAM83D	family with sequence similarity 83, member D	0	0	1	1	0	0	0	1	0	1	1
hsa-miR-19a	MIMAT0000073	NM_015541	LRIG1	leucine-rich repeats and immunoglobulin-like domains 1	0	0	0	1	0	0	1	1	0	1	1
hsa-miR-19a	MIMAT0000073	NM_030918	SNX27	sorting nexin family member 27	0	0	1	0	0	0	1	1	0	1	1
hsa-miR-19a	MIMAT0000073	NM_015630	EPC2	enhancer of polycomb homolog 2 (Drosophila)	0	0	1	0	0	0	1	1	0	1	1
hsa-miR-19a	MIMAT0000073	NM_015355	SUZ12	suppressor of zeste 12 homolog (Drosophila)	0	0	1	1	0	0	0	1	0	1	1
hsa-miR-19a	MIMAT0000073	NM_015339	ADNP	activity-dependent neuroprotector homeobox	0	0	0	1	0	0	1	1	0	1	1
hsa-miR-19a	MIMAT0000073	NM_017762	MTMR10	myotubularin related protein 10	0	0	1	1	0	0	0	1	0	1	1
hsa-miR-19a	MIMAT0000073	NM_015215	CAMTA1	calmodulin binding transcription activator 1	0	0	0	1	0	0	1	1	0	1	1
hsa-miR-19a	MIMAT0000073	NM_031443	CCM2	cerebral cavernous malformation 2	0	0	1	1	0	0	1	1	0	1	0
hsa-miR-19a	MIMAT0000073	NM_015247	CYLD	cylindromatosis (turban tumor syndrome)	0	0	1	1	0	0	1	1	0	1	0
hsa-miR-19a	MIMAT0000073	NM_015260	SIN3B	SIN3 homolog B, transcription regulator (yeast)	0	0	1	1	0	0	1	1	0	1	0
hsa-miR-19a	MIMAT0000073	NM_015270	ADCY6	adenylate cyclase 6	0	0	1	0	0	0	1	1	0	1	1
hsa-miR-19a	MIMAT0000073	NM_031418	TMEM16C	transmembrane protein 16C	0	0	1	0	0	0	1	1	0	1	1
hsa-miR-19a	MIMAT0000073	NM_015291	DNAJC16	DnaJ (Hsp40) homolog, subfamily C, member 16	0	0	1	1	0	0	0	1	0	1	1
hsa-miR-19a	MIMAT0000073	NM_031411	PCDHA1	protocadherin alpha 1	0	0	1	1	0	0	1	1	0	1	0
hsa-miR-19a	MIMAT0000073	NM_015313	ARHGEF12	Rho guanine nucleotide exchange factor (GEF) 12	0	0	1	0	0	0	1	1	0	1	1
hsa-miR-19a	MIMAT0000073	NM_015335	MED13L	mediator complex subunit 13-like	0	0	1	0	0	0	1	1	0	1	1
hsa-miR-19a	MIMAT0000073	NM_015646	RAP1B	RAP1B, member of RAS oncogene family	0	0	1	1	0	0	1	1	0	1	0
hsa-miR-19a	MIMAT0000073	NM_030915	LBH	limb bud and heart development homolog (mouse)	0	0	1	0	0	0	1	1	0	1	1
hsa-miR-19a	MIMAT0000073	NM_024700	SNIP1	Smad nuclear interacting protein 1	0	0	0	1	0	0	1	1	0	1	1
hsa-miR-19a	MIMAT0000073	NM_017508	SOX6	SRY (sex determining region Y)-box 6	0	0	1	1	0	0	0	1	0	1	1
hsa-miR-19a	MIMAT0000073	NM_017491	WDR1	WD repeat domain 1	0	0	1	1	0	0	1	1	0	1	0
hsa-miR-19a	MIMAT0000073	NM_025160	WDR26	WD repeat domain 26	0	0	1	0	0	0	1	1	0	1	1
hsa-miR-19a	MIMAT0000073	NM_016339	RAPGEFL1	Rap guanine nucleotide exchange factor (GEF)-like 1	0	0	1	0	0	0	1	1	0	1	1
hsa-miR-19a	MIMAT0000073	NM_016374	ARID4B	AT rich interactive domain 4B (RBP1-like)	0	0	1	0	0	0	1	1	0	1	1
hsa-miR-19a	MIMAT0000073	NM_016436	PHF20	PHD finger protein 20	0	0	0	1	0	0	1	1	0	1	1
hsa-miR-19a	MIMAT0000073	NM_017420	SIX4	SIX homeobox 4	0	0	1	1	0	0	0	1	0	1	1
hsa-miR-19a	MIMAT0000073	NM_024841	FLJ14213	protor-2	0	0	1	0	0	0	1	1	0	1	1
hsa-miR-19a	MIMAT0000073	NM_025054	VCPIP1	valosin containing protein (p97)/p47 complex interacting protein 1	0	0	1	0	0	0	1	1	0	1	1
hsa-miR-19a	MIMAT0000073	NM_024939	RBM35B	RNA binding motif protein 35B	0	0	1	0	0	0	1	1	0	1	1
hsa-miR-19a	MIMAT0000073	NM_016289	CAB39	calcium binding protein 39	0	0	1	0	0	0	1	1	0	1	1
hsa-miR-19a	MIMAT0000073	NM_016231	NLK	nemo-like kinase	0	0	1	0	0	0	1	1	0	1	1
hsa-miR-19a	MIMAT0000073	NM_016083	CNR1	cannabinoid receptor 1 (brain)	0	0	1	0	0	0	1	1	0	1	1
hsa-miR-19a	MIMAT0000073	NM_017637	BNC2	basonuclin 2	0	0	1	0	0	0	1	1	0	1	1
hsa-miR-19a	MIMAT0000073	NM_030803	ATG16L1	ATG16 autophagy related 16-like 1 (S. cerevisiae)	0	0	1	1	0	0	1	1	0	1	0
hsa-miR-19a	MIMAT0000073	NM_030627	CPEB4	cytoplasmic polyadenylation element binding protein 4	0	0	1	0	0	0	1	1	0	1	1
hsa-miR-19a	MIMAT0000073	NM_017633	FAM46A	family with sequence similarity 46, member A	0	0	1	1	0	0	0	1	0	1	1
hsa-miR-19a	MIMAT0000073	NM_030621	DICER1	dicer 1, ribonuclease type III	0	0	1	0	0	0	1	1	0	1	1
hsa-miR-19a	MIMAT0000073	NM_015906	TRIM33	tripartite motif-containing 33	0	0	1	1	0	0	0	1	0	1	1
hsa-miR-19a	MIMAT0000073	NM_017553	INOC1	INO80 complex homolog 1 (S. cerevisiae)	0	0	1	0	0	0	1	1	0	1	1
hsa-miR-19a	MIMAT0000073	NM_030576	LIMD2	LIM domain containing 2	0	0	1	0	0	0	1	1	0	1	1
hsa-miR-19a	MIMAT0000073	NM_025250	TTYH3	tweety homolog 3 (Drosophila)	0	0	1	0	0	0	1	1	0	1	1
hsa-miR-19a	MIMAT0000073	NM_016081	PALLD	palladin, cytoskeletal associated protein	0	0	1	0	0	0	1	1	0	1	1
hsa-miR-19a	MIMAT0000073	NM_016639	TNFRSF12A	tumor necrosis factor receptor superfamily, member 12A	0	0	1	0	0	0	1	1	0	1	1
hsa-miR-19a	MIMAT0000073	NM_031849	PCDHA6	protocadherin alpha 6	0	0	1	1	0	0	1	1	0	1	0
hsa-miR-19a	MIMAT0000073	NM_013354	CNOT7	CCR4-NOT transcription complex, subunit 7	0	0	0	1	0	0	1	1	0	1	1
hsa-miR-19a	MIMAT0000073	NM_014506	TOR1B	torsin family 1, member B (torsin B)	0	0	1	0	0	0	1	1	0	1	1
hsa-miR-19a	MIMAT0000073	NM_015879	ST8SIA3	ST8 alpha-N-acetyl-neuraminide alpha-2,8-sialyltransferase 3	0	0	1	0	0	0	1	1	0	1	1
hsa-miR-19a	MIMAT0000073	NM_032846	RAB2B	RAB2B, member RAS oncogene family	0	0	1	0	0	0	1	1	0	1	1
hsa-miR-19a	MIMAT0000073	NM_014667	VGLL4	vestigial like 4 (Drosophila)	0	0	1	0	0	0	1	1	0	1	1
hsa-miR-19a	MIMAT0000073	NM_032840	SPRYD3	SPRY domain containing 3	0	0	1	0	0	0	1	1	0	1	1
hsa-miR-19a	MIMAT0000073	NM_032682	FOXP1	forkhead box P1	0	0	1	0	0	0	1	1	0	1	1
hsa-miR-19a	MIMAT0000073	NM_014723	SNPH	syntaphilin	0	0	1	0	0	0	1	1	0	1	1
hsa-miR-19a	MIMAT0000073	NM_014730	KIAA0152	KIAA0152	0	0	1	0	0	0	1	1	0	1	1
hsa-miR-19a	MIMAT0000073	NM_032582	USP32	ubiquitin specific peptidase 32	0	0	0	1	0	0	1	1	0	1	1
hsa-miR-19a	MIMAT0000073	NM_024551	ADIPOR2	adiponectin receptor 2	0	0	0	1	0	0	1	1	0	1	1
hsa-miR-19a	MIMAT0000073	NM_014458	KLHL20	kelch-like 20 (Drosophila)	0	0	1	0	0	0	1	1	0	1	1
hsa-miR-19a	MIMAT0000073	NM_032980	DTNA	dystrobrevin, alpha	0	0	1	1	0	0	1	1	0	1	0
hsa-miR-19a	MIMAT0000073	NM_023929	ZBTB10	zinc finger and BTB domain containing 10	0	0	0	1	0	0	1	1	0	1	1
hsa-miR-19a	MIMAT0000073	NM_018904	PCDHA13	protocadherin alpha 13	0	0	0	1	0	0	1	1	0	1	1
hsa-miR-19a	MIMAT0000073	NM_014011	SOCS5	suppressor of cytokine signaling 5	0	0	1	0	0	0	1	1	0	1	1
hsa-miR-19a	MIMAT0000073	NM_033044	MACF1	microtubule-actin crosslinking factor 1	0	0	1	1	0	0	1	1	0	1	0
hsa-miR-19a	MIMAT0000073	NM_014112	TRPS1	trichorhinophalangeal syndrome I	0	0	1	0	0	0	1	1	0	1	1
hsa-miR-19a	MIMAT0000073	NM_014849	SV2A	synaptic vesicle glycoprotein 2A	0	0	0	1	0	0	1	1	0	1	1
hsa-miR-19a	MIMAT0000073	NM_014154	ARMC8	armadillo repeat containing 8	0	0	1	0	0	0	1	1	0	1	1
hsa-miR-19a	MIMAT0000073	NM_014319	LEMD3	LEM domain containing 3	0	0	1	0	0	0	1	1	0	1	1
hsa-miR-19a	MIMAT0000073	NM_018899	PCDHAC2	protocadherin alpha subfamily C, 2	0	0	0	1	0	0	1	1	0	1	1
hsa-miR-19a	MIMAT0000073	NM_018898	PCDHAC1	protocadherin alpha subfamily C, 1	0	0	0	1	0	0	1	1	0	1	1
hsa-miR-19a	MIMAT0000073	NM_018674	ACCN4	amiloride-sensitive cation channel 4, pituitary	0	0	1	0	0	0	1	1	0	1	1
hsa-miR-19a	MIMAT0000073	NM_024612	DHX40	DEAH (Asp-Glu-Ala-His) box polypeptide 40	0	0	1	0	0	0	1	1	0	1	1
hsa-miR-19a	MIMAT0000073	NM_014795	ZEB2	zinc finger E-box binding homeobox 2	0	0	1	0	0	0	1	1	0	1	1
hsa-miR-19a	MIMAT0000073	NM_014803	ZNF518A	zinc finger protein 518A	0	0	1	1	0	0	0	1	0	1	1
hsa-miR-19a	MIMAT0000073	NM_015026	MON2	MON2 homolog (S. cerevisiae)	0	0	1	1	0	0	0	1	0	1	1
hsa-miR-19a	MIMAT0000073	NM_015035	ZHX3	zinc fingers and homeoboxes 3	0	0	1	0	0	0	1	1	0	1	1
hsa-miR-19a	MIMAT0000073	NM_173060	CAST	calpastatin	0	0	1	1	0	0	1	1	0	1	0
hsa-miR-19a	MIMAT0000073	NM_024667	VPS37B	vacuolar protein sorting 37 homolog B (S. cerevisiae)	0	0	1	0	0	0	1	1	0	1	1
hsa-miR-19a	MIMAT0000073	NM_015059	TLN2	talin 2	0	0	1	0	0	0	1	1	0	1	1
hsa-miR-19a	MIMAT0000073	NM_031934	RAB34	RAB34, member RAS oncogene family	0	0	1	0	0	0	1	1	0	1	1
hsa-miR-19a	MIMAT0000073	NM_015091	KIAA0423	KIAA0423	0	0	1	0	0	0	1	1	0	1	1
hsa-miR-19a	MIMAT0000073	NM_001788	SEPT7	septin 7	0	0	1	1	0	0	1	1	0	1	0
hsa-miR-19a	MIMAT0000073	NM_015149	RGL1	ral guanine nucleotide dissociation stimulator-like 1	0	0	0	1	0	0	1	1	0	1	1
hsa-miR-19a	MIMAT0000073	NM_015159	FAM168A	family with sequence similarity 168, member A	0	0	1	1	0	0	0	1	0	1	1
hsa-miR-19a	MIMAT0000073	NM_032156	CAPRIN2	caprin family member 2	0	0	1	1	0	0	1	1	0	1	0
hsa-miR-19a	MIMAT0000073	NM_014999	RAB21	RAB21, member RAS oncogene family	0	0	1	0	0	0	1	1	0	1	1
hsa-miR-19a	MIMAT0000073	NM_024663	NPEPL1	aminopeptidase-like 1	0	0	0	1	0	0	1	1	0	1	1
hsa-miR-19a	MIMAT0000073	NM_018287	ARHGAP12	Rho GTPase activating protein 12	0	0	0	1	0	0	1	1	0	1	1
hsa-miR-19a	MIMAT0000073	NM_018254	RCOR3	REST corepressor 3	0	0	1	1	0	0	1	1	0	1	0
hsa-miR-19a	MIMAT0000073	NM_018184	ARL8B	ADP-ribosylation factor-like 8B	0	0	1	0	0	0	1	1	0	1	1
hsa-miR-19a	MIMAT0000073	NM_032491	RFX4	regulatory factor X, 4 (influences HLA class II expression)	0	0	1	0	0	0	1	1	0	1	1
hsa-miR-19a	MIMAT0000073	NM_032373	PCGF5	polycomb group ring finger 5	0	0	1	0	0	0	1	1	0	1	1
hsa-miR-19a	MIMAT0000073	NM_014901	RNF44	ring finger protein 44	0	0	1	0	0	0	1	1	0	1	1
hsa-miR-19a	MIMAT0000073	NM_014903	NAV3	neuron navigator 3	0	0	1	0	0	0	1	1	0	1	1
hsa-miR-19a	MIMAT0000073	NM_024652	LRRK1	leucine-rich repeat kinase 1	0	0	1	0	0	0	1	1	0	1	1
hsa-miR-19a	MIMAT0000073	NM_014964	EPN2	epsin 2	0	0	1	0	0	0	1	1	0	1	1
hsa-miR-19a	MIMAT0000073	NM_014988	LIMCH1	LIM and calponin homology domains 1	0	0	1	1	0	0	0	1	0	1	1
hsa-miR-19a	MIMAT0000073	NM_020134	DPYSL5	dihydropyrimidinase-like 5	0	0	1	0	0	0	1	1	0	1	1
hsa-miR-19a	MIMAT0000073	NM_005378	MYCN	v-myc myelocytomatosis viral related oncogene, neuroblastoma derived (avian)	0	0	0	1	0	0	1	1	0	1	1
hsa-miR-19a	MIMAT0000073	NM_181291	WDR20	WD repeat domain 20	0	0	0	1	0	0	1	1	0	1	1
hsa-miR-19a	MIMAT0000073	NM_001419	ELAVL1	ELAV (embryonic lethal, abnormal vision, Drosophila)-like 1 (Hu antigen R)	0	0	1	0	0	0	1	1	0	1	1
hsa-miR-19a	MIMAT0000073	NM_001432	EREG	epiregulin	0	0	1	0	0	0	1	1	0	1	1
hsa-miR-19a	MIMAT0000073	NM_001458	FLNC	filamin C, gamma (actin binding protein 280)	0	0	1	0	0	0	1	1	0	1	1
hsa-miR-19a	MIMAT0000073	NM_001546	ID4	inhibitor of DNA binding 4, dominant negative helix-loop-helix protein	0	0	1	0	0	0	1	1	0	1	1
hsa-miR-19a	MIMAT0000073	NM_001683	ATP2B2	ATPase, Ca++ transporting, plasma membrane 2	0	0	1	1	0	0	1	1	0	1	0
hsa-miR-19a	MIMAT0000073	NM_175866	UHMK1	U2AF homology motif (UHM) kinase 1	0	0	1	0	0	0	1	1	0	1	1
hsa-miR-19a	MIMAT0000073	NM_001755	CBFB	core-binding factor, beta subunit	0	0	1	1	0	0	1	1	0	1	0
hsa-miR-19a	MIMAT0000073	NM_175709	CBX7	chromobox homolog 7	0	0	1	0	0	0	1	1	0	1	1
hsa-miR-19a	MIMAT0000073	NM_001005158	SFMBT1	Scm-like with four mbt domains 1	0	0	1	0	0	0	1	1	0	1	1
hsa-miR-19a	MIMAT0000073	NM_174934	SCN4B	sodium channel, voltage-gated, type IV, beta	0	0	1	0	0	0	1	1	0	1	1
hsa-miR-19a	MIMAT0000073	NM_001400	S1PR1	sphingosine-1-phosphate receptor 1	0	0	0	1	0	0	1	1	0	1	1
hsa-miR-19a	MIMAT0000073	NM_001356	DDX3X	DEAD (Asp-Glu-Ala-Asp) box polypeptide 3, X-linked	0	0	1	1	0	0	0	1	0	1	1
hsa-miR-19a	MIMAT0000073	NM_001315	MAPK14	mitogen-activated protein kinase 14	0	0	1	1	0	0	1	1	0	1	0
hsa-miR-19a	MIMAT0000073	NM_001080421	UNC13A	unc-13 homolog A (C. elegans)	0	0	1	1	0	0	0	1	0	1	1
hsa-miR-19a	MIMAT0000073	NM_178585	WDFY3	WD repeat and FYVE domain containing 3	0	0	1	1	0	0	1	1	0	1	0
hsa-miR-19a	MIMAT0000073	NM_018911	PCDHA8	protocadherin alpha 8	0	0	1	0	0	0	1	1	0	1	1
hsa-miR-19a	MIMAT0000073	NM_178457	ZNF831	zinc finger protein 831	0	0	1	1	0	0	0	1	0	1	1
hsa-miR-19a	MIMAT0000073	NM_001102	ACTN1	actinin, alpha 1	0	0	1	0	0	0	1	1	0	1	1
hsa-miR-19a	MIMAT0000073	NM_001114	ADCY7	adenylate cyclase 7	0	0	1	0	0	0	1	1	0	1	1
hsa-miR-19a	MIMAT0000073	NM_001116	ADCY9	adenylate cyclase 9	0	0	1	0	0	0	1	1	0	1	1
hsa-miR-19a	MIMAT0000073	NM_001198	PRDM1	PR domain containing 1, with ZNF domain	0	0	1	0	0	0	1	1	0	1	1
hsa-miR-19a	MIMAT0000073	NM_001241	CCNT2	cyclin T2	0	0	1	0	0	0	1	1	0	1	1
hsa-miR-19a	MIMAT0000073	NM_001310	CREBL2	cAMP responsive element binding protein-like 2	0	0	1	0	0	0	1	1	0	1	1
hsa-miR-19a	MIMAT0000073	NM_001858	COL19A1	collagen, type XIX, alpha 1	0	0	1	0	0	0	1	1	0	1	1
hsa-miR-19a	MIMAT0000073	NM_174886	TGIF1	TGFB-induced factor homeobox 1	0	0	1	1	0	0	1	1	0	1	0
hsa-miR-19a	MIMAT0000073	NM_001901	CTGF	connective tissue growth factor	0	0	1	0	0	0	1	1	0	1	1
hsa-miR-19a	MIMAT0000073	NM_002500	NEUROD1	neurogenic differentiation 1	0	0	0	1	0	0	1	1	0	1	1
hsa-miR-19a	MIMAT0000073	NM_173083	LIN9	lin-9 homolog (C. elegans)	0	0	0	1	0	0	1	1	0	1	1
hsa-miR-19a	MIMAT0000073	NM_002731	PRKACB	protein kinase, cAMP-dependent, catalytic, beta	0	0	1	0	0	0	1	1	0	1	1
hsa-miR-19a	MIMAT0000073	NM_002748	MAPK6	mitogen-activated protein kinase 6	0	0	1	1	0	0	0	1	0	1	1
hsa-miR-19a	MIMAT0000073	NM_002779	PSD	pleckstrin and Sec7 domain containing	0	0	0	1	0	0	1	1	0	1	1
hsa-miR-19a	MIMAT0000073	NM_002884	RAP1A	RAP1A, member of RAS oncogene family	0	0	1	1	0	0	1	1	0	1	0
hsa-miR-19a	MIMAT0000073	NM_002918	RFX1	regulatory factor X, 1 (influences HLA class II expression)	0	0	1	0	0	0	1	1	0	1	1
hsa-miR-19a	MIMAT0000073	NM_153812	PHF13	PHD finger protein 13	0	0	0	1	0	0	1	1	0	1	1
hsa-miR-19a	MIMAT0000073	NM_002997	SDC1	syndecan 1	0	0	1	1	0	0	1	1	0	1	0
hsa-miR-19a	MIMAT0000073	NM_153810	C10orf46	chromosome 10 open reading frame 46	0	0	1	1	0	0	0	1	0	1	1
hsa-miR-19a	MIMAT0000073	NM_173209	TGIF1	TGFB-induced factor homeobox 1	0	0	1	1	0	0	1	1	0	1	0
hsa-miR-19a	MIMAT0000073	NM_173210	TGIF1	TGFB-induced factor homeobox 1	0	0	1	1	0	0	1	1	0	1	0
hsa-miR-19a	MIMAT0000073	NM_002268	KPNA4	karyopherin alpha 4 (importin alpha 3)	0	0	1	0	0	0	1	1	0	1	1
hsa-miR-19a	MIMAT0000073	NM_001981	EPS15	epidermal growth factor receptor pathway substrate 15	0	0	1	1	0	0	0	1	0	1	1
hsa-miR-19a	MIMAT0000073	NM_001993	F3	coagulation factor III (thromboplastin, tissue factor)	0	0	1	1	0	0	1	1	0	0	1
hsa-miR-19a	MIMAT0000073	NM_173642	FAM80A	family with sequence similarity 80, member A	0	0	0	1	0	0	1	1	0	1	1
hsa-miR-19a	MIMAT0000073	NM_002082	GRK6	G protein-coupled receptor kinase 6	0	0	1	1	0	0	1	1	0	1	0
hsa-miR-19a	MIMAT0000073	NM_002166	ID2	inhibitor of DNA binding 2, dominant negative helix-loop-helix protein	0	0	1	1	0	0	0	1	0	1	1
hsa-miR-19a	MIMAT0000073	NM_002193	INHBB	inhibin, beta B	0	0	1	0	0	0	1	1	0	1	1
hsa-miR-19a	MIMAT0000073	NM_173475	DCUN1D3	DCN1, defective in cullin neddylation 1, domain containing 3 (S. cerevisiae)	0	0	1	0	0	0	1	1	0	1	1
hsa-miR-19a	MIMAT0000073	NM_173470	TMEM32	transmembrane protein 32	0	0	1	1	0	0	0	1	0	1	1
hsa-miR-19a	MIMAT0000073	NM_002214	ITGB8	integrin, beta 8	0	0	1	1	0	0	0	1	0	1	1
hsa-miR-19a	MIMAT0000073	NM_173211	TGIF1	TGFB-induced factor homeobox 1	0	0	1	1	0	0	1	1	0	1	0
hsa-miR-19a	MIMAT0000073	NM_003077	SMARCD2	SWI/SNF related, matrix associated, actin dependent regulator of chromatin, subfamily d, member 2	0	0	0	1	0	0	1	1	0	1	1
hsa-miR-19a	MIMAT0000073	NM_000276	OCRL	oculocerebrorenal syndrome of Lowe	0	0	1	0	0	0	1	1	0	1	1
hsa-miR-19a	MIMAT0000073	NM_001002257	LYCAT	lysocardiolipin acyltransferase	0	0	0	1	0	0	1	1	0	1	1
hsa-miR-19a	MIMAT0000073	NM_206907	PRKAA1	protein kinase, AMP-activated, alpha 1 catalytic subunit	0	0	1	1	0	0	1	1	0	1	0
hsa-miR-19a	MIMAT0000073	NM_001003792	RBMS3	RNA binding motif, single stranded interacting protein	0	0	1	0	0	0	1	1	0	1	1
hsa-miR-19a	MIMAT0000073	NM_001004106	GRK6	G protein-coupled receptor kinase 6	0	0	0	1	0	0	1	1	0	1	1
hsa-miR-19a	MIMAT0000073	NM_206855	QKI	quaking homolog, KH domain RNA binding (mouse)	0	0	1	1	0	0	1	1	0	1	0
hsa-miR-19a	MIMAT0000073	NM_001006946	SDC1	syndecan 1	0	0	1	1	0	0	0	1	0	1	1
hsa-miR-19a	MIMAT0000073	NM_205768	ZNF238	zinc finger protein 238	0	0	1	1	0	0	1	1	0	1	0
hsa-miR-19a	MIMAT0000073	NM_001007237	IGSF3	immunoglobulin superfamily, member 3	0	0	1	1	0	0	0	1	0	1	1
hsa-miR-19a	MIMAT0000073	NM_203437	AFTPH	aftiphilin	0	0	1	1	0	0	1	1	0	1	0
hsa-miR-19a	MIMAT0000073	NM_001009555	SH3D19	SH3 domain containing 19	0	0	1	1	0	0	0	1	0	1	1
hsa-miR-19a	MIMAT0000073	NM_001001331	ATP2B2	ATPase, Ca++ transporting, plasma membrane 2	0	0	0	1	0	0	1	1	0	1	1
hsa-miR-19a	MIMAT0000073	NM_001001330	REEP3	receptor accessory protein 3	0	0	0	1	0	0	1	1	0	1	1
hsa-miR-19a	MIMAT0000073	NM_000901	NR3C2	nuclear receptor subfamily 3, group C, member 2	0	0	1	0	0	0	1	1	0	1	1
hsa-miR-19a	MIMAT0000073	NM_207363	NAP5	Nck-associated protein 5	0	0	1	1	0	0	0	1	0	1	1
hsa-miR-19a	MIMAT0000073	NM_000489	ATRX	alpha thalassemia/mental retardation syndrome X-linked (RAD54 homolog, S. cerevisiae)	0	0	1	0	0	0	1	1	0	1	1
hsa-miR-19a	MIMAT0000073	NM_000598	IGFBP3	insulin-like growth factor binding protein 3	0	0	0	1	0	0	1	1	0	1	1
hsa-miR-19a	MIMAT0000073	NM_000618	IGF1	insulin-like growth factor 1 (somatomedin C)	0	0	1	1	0	0	0	1	0	1	1
hsa-miR-19a	MIMAT0000073	NM_000684	ADRB1	adrenergic, beta-1-, receptor	0	0	1	1	0	0	0	1	0	1	1
hsa-miR-19a	MIMAT0000073	NM_000719	CACNA1C	calcium channel, voltage-dependent, L type, alpha 1C subunit	0	0	0	1	0	0	1	1	0	1	1
hsa-miR-19a	MIMAT0000073	NM_207299	RP11-35N6.1	plasticity related gene 3	0	0	1	1	0	0	1	1	0	1	0
hsa-miR-19a	MIMAT0000073	NM_207297	MBNL1	muscleblind-like (Drosophila)	0	0	1	0	0	0	1	1	0	1	1
hsa-miR-19a	MIMAT0000073	NM_000876	IGF2R	insulin-like growth factor 2 receptor	0	0	0	1	0	0	1	1	0	1	1
hsa-miR-19a	MIMAT0000073	NM_000883	IMPDH1	IMP (inosine monophosphate) dehydrogenase 1	0	0	0	1	0	0	1	1	0	1	1
hsa-miR-19a	MIMAT0000073	NM_201624	USP33	ubiquitin specific peptidase 33	0	0	1	1	0	0	1	1	0	1	0
hsa-miR-19a	MIMAT0000073	NM_201274	MPRIP	myosin phosphatase Rho interacting protein	0	0	1	0	0	0	1	1	0	1	1
hsa-miR-19a	MIMAT0000073	NM_199355	ADAMTS18	ADAM metallopeptidase with thrombospondin type 1 motif, 18	0	0	0	1	0	0	1	1	0	1	1
hsa-miR-19a	MIMAT0000073	NM_001034852	SMOC1	SPARC related modular calcium binding 1	0	0	1	1	0	0	0	1	0	1	1
hsa-miR-19a	MIMAT0000073	NM_194329	RNF38	ring finger protein 38	0	0	1	1	0	0	1	1	0	1	0
hsa-miR-19a	MIMAT0000073	NM_194328	RNF38	ring finger protein 38	0	0	1	1	0	0	1	1	0	1	0
hsa-miR-19a	MIMAT0000073	NM_001039840	CHIC1	cysteine-rich hydrophobic domain 1	0	0	1	1	0	0	0	1	0	1	1
hsa-miR-19a	MIMAT0000073	NM_194282	LIN54	lin-54 homolog (C. elegans)	0	0	1	0	0	0	1	1	0	1	1
hsa-miR-19a	MIMAT0000073	NM_001040712	PTPRD	protein tyrosine phosphatase, receptor type, D	0	0	1	1	0	0	0	1	0	1	1
hsa-miR-19a	MIMAT0000073	NM_001042355	CYLD	cylindromatosis (turban tumor syndrome)	0	0	1	1	0	0	0	1	0	1	1
hsa-miR-19a	MIMAT0000073	NM_001042440	CAST	calpastatin	0	0	1	1	0	0	0	1	0	1	1
hsa-miR-19a	MIMAT0000073	NM_001042473	ACBD5	acyl-Coenzyme A binding domain containing 5	0	0	1	1	0	0	0	1	0	1	1
hsa-miR-19a	MIMAT0000073	NM_182551	LYCAT	lysocardiolipin acyltransferase	0	0	1	1	0	0	1	1	0	1	0
hsa-miR-19a	MIMAT0000073	NM_194330	RNF38	ring finger protein 38	0	0	1	1	0	0	1	1	0	1	0
hsa-miR-19a	MIMAT0000073	NM_194332	RNF38	ring finger protein 38	0	0	1	1	0	0	1	1	0	1	0
hsa-miR-19a	MIMAT0000073	NM_198240	CLIP1	CAP-GLY domain containing linker protein 1	0	0	1	1	0	0	1	1	0	1	0
hsa-miR-19a	MIMAT0000073	NM_001024843	TNRC6B	trinucleotide repeat containing 6B	0	0	1	1	0	0	0	1	0	1	1
hsa-miR-19a	MIMAT0000073	NM_001024847	TGFBR2	transforming growth factor, beta receptor II (70/80kDa)	0	0	1	1	0	0	0	1	0	1	1
hsa-miR-19a	MIMAT0000073	NM_199169	PMEPA1	prostate transmembrane protein, androgen induced 1	0	0	1	1	0	0	1	1	0	1	0
hsa-miR-19a	MIMAT0000073	NM_199072	MDFIC	MyoD family inhibitor domain containing	0	0	1	0	0	0	1	1	0	1	1
hsa-miR-19a	MIMAT0000073	NM_001025266	C3orf70	chromosome 3 open reading frame 70	0	0	1	1	0	0	0	1	0	1	1
hsa-miR-19a	MIMAT0000073	NM_001025593	ARFIP1	ADP-ribosylation factor interacting protein 1 (arfaptin 1)	0	0	1	1	0	0	0	1	0	1	1
hsa-miR-19a	MIMAT0000073	NM_198465	NRK	Nik related kinase	0	0	1	0	0	0	1	1	0	1	1
hsa-miR-19a	MIMAT0000073	NM_198270	NHS	Nance-Horan syndrome (congenital cataracts and dental anomalies)	0	0	1	0	0	0	1	1	0	1	1
hsa-miR-19a	MIMAT0000073	NM_001032282	KLF10	Kruppel-like factor 10	0	0	1	1	0	0	0	1	0	1	1
hsa-miR-19a	MIMAT0000073	NM_001033081	MYCL1	v-myc myelocytomatosis viral oncogene homolog 1, lung carcinoma derived (avian)	0	0	1	1	0	0	0	1	0	1	1
hsa-miR-19a	MIMAT0000073	NM_181442	ADNP	activity-dependent neuroprotector homeobox	0	0	1	1	0	0	1	1	0	1	0
hsa-miR-19a	MIMAT0000073	NM_145698	ACBD5	acyl-Coenzyme A binding domain containing 5	0	0	1	1	0	0	1	1	0	1	0
hsa-miR-19a	MIMAT0000073	NM_003607	CDC42BPA	CDC42 binding protein kinase alpha (DMPK-like)	0	0	1	1	0	0	0	1	0	1	1
hsa-miR-19a	MIMAT0000073	NM_004748	CCPG1	cell cycle progression 1	0	0	1	1	0	0	0	1	0	1	1
hsa-miR-19a	MIMAT0000073	NM_004171	SLC1A2	solute carrier family 1 (glial high affinity glutamate transporter), member 2	0	0	1	0	0	0	1	1	0	1	1
hsa-miR-19a	MIMAT0000073	NM_003884	PCAF	p300/CBP-associated factor	0	0	1	0	0	0	1	1	0	1	1
hsa-miR-19a	MIMAT0000073	NM_003488	AKAP1	A kinase (PRKA) anchor protein 1	0	0	0	1	0	0	1	1	0	1	1
hsa-miR-19a	MIMAT0000073	NM_003478	CUL5	cullin 5	0	0	1	0	0	0	1	1	0	1	1
hsa-miR-19a	MIMAT0000073	NM_152490	B3GALNT2	beta-1,3-N-acetylgalactosaminyltransferase 2	0	0	1	1	0	0	1	1	0	0	1
hsa-miR-19a	MIMAT0000073	NM_003474	ADAM12	ADAM metallopeptidase domain 12 (meltrin alpha)	0	0	1	0	0	0	1	1	0	1	1
hsa-miR-19a	MIMAT0000073	NM_004898	CLOCK	clock homolog (mouse)	0	0	1	0	0	0	1	1	0	1	1
hsa-miR-19a	MIMAT0000073	NM_004454	ETV5	ets variant gene 5 (ets-related molecule)	0	0	1	1	0	0	0	1	0	1	1
hsa-miR-19a	MIMAT0000073	NM_004443	EPHB3	EPH receptor B3	0	0	0	1	0	0	1	1	0	1	1
hsa-miR-19a	MIMAT0000073	NM_004459	BPTF	bromodomain PHD finger transcription factor	0	0	1	0	0	0	1	1	0	1	1
hsa-miR-19a	MIMAT0000073	NM_004161	RAB1A	RAB1A, member RAS oncogene family	0	0	1	0	0	0	1	1	0	1	1
hsa-miR-19a	MIMAT0000073	NM_152520	ZNF385B	zinc finger protein 385B	0	0	1	1	0	0	1	1	0	0	1
hsa-miR-19a	MIMAT0000073	NM_004799	ZFYVE9	zinc finger, FYVE domain containing 9	0	0	1	0	0	0	1	1	0	1	1
hsa-miR-19a	MIMAT0000073	NM_004077	CS	citrate synthase	0	0	1	0	0	0	1	1	0	1	1
hsa-miR-19a	MIMAT0000073	NM_004776	B4GALT5	UDP-Gal:betaGlcNAc beta 1,4- galactosyltransferase, polypeptide 5	0	0	1	0	0	0	1	1	0	1	1
hsa-miR-19a	MIMAT0000073	NM_152622	MIER3	mesoderm induction early response 1, family member 3	0	0	1	0	0	0	1	1	0	1	1
hsa-miR-19a	MIMAT0000073	NM_004566	PFKFB3	6-phosphofructo-2-kinase/fructose-2,6-biphosphatase 3	0	0	1	0	0	0	1	1	0	1	1
hsa-miR-19a	MIMAT0000073	NM_004093	EFNB2	ephrin-B2	0	0	1	0	0	0	1	1	0	1	1
hsa-miR-19a	MIMAT0000073	NM_004317	ASNA1	arsA arsenite transporter, ATP-binding, homolog 1 (bacterial)	0	0	1	0	0	0	1	1	0	1	1
hsa-miR-19a	MIMAT0000073	NM_152556	FLJ31818	hypothetical protein FLJ31818	0	0	1	0	0	0	1	1	0	1	1
hsa-miR-19a	MIMAT0000073	NM_003718	CDC2L5	cell division cycle 2-like 5 (cholinesterase-related cell division controller)	0	0	1	0	0	0	1	1	0	1	1
hsa-miR-19a	MIMAT0000073	NM_004758	BZRAP1	benzodiazapine receptor (peripheral) associated protein 1	0	0	1	0	0	0	1	1	0	1	1
hsa-miR-19a	MIMAT0000073	NM_004103	PTK2B	PTK2B protein tyrosine kinase 2 beta	0	0	1	0	0	0	1	1	0	1	1
hsa-miR-19a	MIMAT0000073	NM_004966	HNRNPF	heterogeneous nuclear ribonucleoprotein F	0	0	0	1	0	0	1	1	0	1	1
hsa-miR-19a	MIMAT0000073	NM_004947	DOCK3	dedicator of cytokinesis 3	0	0	1	0	0	0	1	1	0	1	1
hsa-miR-19a	MIMAT0000073	NM_005220	DLX3	distal-less homeobox 3	0	0	1	0	0	0	1	1	0	1	1
hsa-miR-19a	MIMAT0000073	NM_003246	THBS1	thrombospondin 1	0	0	1	1	0	0	1	1	0	1	0
hsa-miR-19a	MIMAT0000073	NM_004747	DLG5	discs, large homolog 5 (Drosophila)	0	0	1	0	0	0	1	1	0	1	1
hsa-miR-19a	MIMAT0000073	NM_152678	FAM116A	family with sequence similarity 116, member A	0	0	0	1	0	0	1	1	0	1	1
hsa-miR-19a	MIMAT0000073	NM_003339	UBE2D2	ubiquitin-conjugating enzyme E2D 2 (UBC4/5 homolog, yeast)	0	0	1	0	0	0	1	1	0	1	1
hsa-miR-19a	MIMAT0000073	NM_004393	DAG1	dystroglycan 1 (dystrophin-associated glycoprotein 1)	0	0	1	0	0	0	1	1	0	1	1
hsa-miR-19a	MIMAT0000073	NM_003954	MAP3K14	mitogen-activated protein kinase kinase kinase 14	0	0	1	0	0	0	1	1	0	1	1
hsa-miR-19a	MIMAT0000073	NM_144593	RHEBL1	Ras homolog enriched in brain like 1	0	0	1	0	0	0	1	1	0	1	1
hsa-miR-19a	MIMAT0000073	NM_145245	EVI5L	ecotropic viral integration site 5-like	0	0	1	0	0	0	1	1	0	1	1
hsa-miR-19a	MIMAT0000073	NM_004308	ARHGAP1	Rho GTPase activating protein 1	0	0	1	0	0	0	1	1	0	1	1
hsa-miR-19a	MIMAT0000073	NM_003981	PRC1	protein regulator of cytokinesis 1	0	0	1	0	0	0	1	1	0	1	1
hsa-miR-19a	MIMAT0000073	NM_153646	SLC24A4	solute carrier family 24 (sodium/potassium/calcium exchanger), member 4	0	0	1	0	0	0	1	1	0	1	1
hsa-miR-19a	MIMAT0000073	NM_004395	DBN1	drebrin 1	0	0	0	1	0	0	1	1	0	1	1
hsa-miR-19a	MIMAT0000073	NM_139283	PPTC7	PTC7 protein phosphatase homolog (S. cerevisiae)	0	0	1	0	0	0	1	1	0	1	1
hsa-miR-19a	MIMAT0000073	NM_003463	PTP4A1	protein tyrosine phosphatase type IVA, member 1	0	0	1	0	0	0	1	1	0	1	1
hsa-miR-19a	MIMAT0000073	NM_145296	CADM4	cell adhesion molecule 4	0	0	1	0	0	0	1	1	0	1	1
hsa-miR-19a	MIMAT0000073	NM_153685	C12orf53	chromosome 12 open reading frame 53	0	0	0	1	0	0	1	1	0	1	1
hsa-miR-19a	MIMAT0000073	NM_004985	KRAS	v-Ki-ras2 Kirsten rat sarcoma viral oncogene homolog	0	0	1	0	0	0	1	1	0	1	1
hsa-miR-19a	MIMAT0000073	NM_152280	SYT11	synaptotagmin XI	0	0	1	0	0	0	1	1	0	1	1
hsa-miR-19a	MIMAT0000073	NM_144726	RNF145	ring finger protein 145	0	0	0	1	0	0	1	1	0	1	1
hsa-miR-19a	MIMAT0000073	NM_005036	PPARA	peroxisome proliferator-activated receptor alpha	0	0	1	1	0	0	1	1	0	1	0
hsa-miR-19a	MIMAT0000073	NM_003458	BSN	bassoon (presynaptic cytomatrix protein)	0	0	1	0	0	0	1	1	0	1	1
hsa-miR-19a	MIMAT0000073	NM_152716	PATL1	protein associated with topoisomerase II homolog 1 (yeast)	0	0	0	1	0	0	1	1	0	1	1
hsa-miR-19a	MIMAT0000073	NM_003390	WEE1	WEE1 homolog (S. pombe)	0	0	1	0	0	0	1	1	0	1	1
hsa-miR-19a	MIMAT0000073	NM_004397	DDX6	DEAD (Asp-Glu-Ala-Asp) box polypeptide 6	0	0	1	1	0	0	0	1	0	1	1
hsa-miR-19a	MIMAT0000073	NM_024312	GNPTAB	N-acetylglucosamine-1-phosphate transferase, alpha and beta subunits	0	0	1	1	0	0	0	1	0	1	0
hsa-miR-19a	MIMAT0000073	NM_199170	PMEPA1	prostate transmembrane protein, androgen induced 1	0	0	0	1	0	0	1	1	0	1	0
hsa-miR-19a	MIMAT0000073	NM_024646	ZYG11B	zyg-11 homolog B (C. elegans)	0	0	1	1	0	0	0	1	0	1	0
hsa-miR-19a	MIMAT0000073	NM_199171	PMEPA1	prostate transmembrane protein, androgen induced 1	0	0	0	1	0	0	1	1	0	1	0
hsa-miR-19a	MIMAT0000073	NM_024574	C4orf31	chromosome 4 open reading frame 31	0	0	0	0	0	0	1	1	0	1	1
hsa-miR-19a	MIMAT0000073	NM_199320	PHF17	PHD finger protein 17	0	0	1	0	0	0	0	1	0	1	1
hsa-miR-19a	MIMAT0000073	NM_145728	DMN	desmuslin	0	0	1	1	0	0	0	1	0	1	0
hsa-miR-19a	MIMAT0000073	NM_183243	IMPDH1	IMP (inosine monophosphate) dehydrogenase 1	0	0	0	1	0	0	1	1	0	1	0
hsa-miR-19a	MIMAT0000073	NM_183419	RNF19A	ring finger protein 19A	0	0	1	1	0	0	0	1	0	1	0
hsa-miR-19a	MIMAT0000073	NM_130391	PTPRD	protein tyrosine phosphatase, receptor type, D	0	0	1	1	0	0	0	1	0	1	0
hsa-miR-19a	MIMAT0000073	NM_194285	SPTY2D1	SPT2, Suppressor of Ty, domain containing 1 (S. cerevisiae)	0	0	0	0	0	0	1	1	0	1	1
hsa-miR-19a	MIMAT0000073	NM_024745	SHCBP1	SHC SH2-domain binding protein 1	0	0	1	1	0	0	0	1	0	1	0
hsa-miR-19a	MIMAT0000073	NM_130392	PTPRD	protein tyrosine phosphatase, receptor type, D	0	0	1	1	0	0	0	1	0	1	0
hsa-miR-19a	MIMAT0000073	NM_152265	BTF3L4	basic transcription factor 3-like 4	0	0	1	0	0	0	0	1	0	1	1
hsa-miR-19a	MIMAT0000073	NM_197972	NME7	non-metastatic cells 7, protein expressed in (nucleoside-diphosphate kinase)	0	0	1	0	0	0	1	1	0	1	0
hsa-miR-19a	MIMAT0000073	NM_130786	A1BG	alpha-1-B glycoprotein	0	0	1	1	0	0	0	1	0	1	0
hsa-miR-19a	MIMAT0000073	NM_198269	HIPK1	homeodomain interacting protein kinase 1	0	0	1	0	0	0	1	1	0	1	0
hsa-miR-19a	MIMAT0000073	NM_133510	RAD51L1	RAD51-like 1 (S. cerevisiae)	0	0	1	1	0	0	0	1	0	1	0
hsa-miR-19a	MIMAT0000073	NM_198324	CS	citrate synthase	0	0	1	0	0	0	1	1	0	1	0
hsa-miR-19a	MIMAT0000073	NM_198336	INSIG1	insulin induced gene 1	0	0	1	1	0	0	0	1	0	1	0
hsa-miR-19a	MIMAT0000073	NM_198584	CA13	carbonic anhydrase XIII	0	0	1	1	0	0	0	1	0	1	0
hsa-miR-19a	MIMAT0000073	NM_198793	CD47	CD47 molecule	0	0	1	1	0	0	0	1	0	1	0
hsa-miR-19a	MIMAT0000073	NM_138270	ATRX	alpha thalassemia/mental retardation syndrome X-linked (RAD54 homolog, S. cerevisiae)	0	0	1	0	0	0	1	1	0	1	0
hsa-miR-19a	MIMAT0000073	NM_145861	EDARADD	EDAR-associated death domain	0	0	1	1	0	0	0	1	0	1	0
hsa-miR-19a	MIMAT0000073	NM_148921	EPN2	epsin 2	0	0	1	0	0	0	1	1	0	1	0
hsa-miR-19a	MIMAT0000073	NM_199413	PRC1	protein regulator of cytokinesis 1	0	0	1	0	0	0	1	1	0	1	0
hsa-miR-19a	MIMAT0000073	NM_213594	RFX4	regulatory factor X, 4 (influences HLA class II expression)	0	0	1	0	0	0	1	1	0	1	0
hsa-miR-19a	MIMAT0000073	NM_207295	MBNL1	muscleblind-like (Drosophila)	0	0	1	0	0	0	1	1	0	1	0
hsa-miR-19a	MIMAT0000073	NM_144949	SOCS5	suppressor of cytokine signaling 5	0	0	1	0	0	0	1	1	0	1	0
hsa-miR-19a	MIMAT0000073	NM_213654	ARMC8	armadillo repeat containing 8	0	0	1	0	0	0	1	1	0	1	0
hsa-miR-19a	MIMAT0000073	NM_207294	MBNL1	muscleblind-like (Drosophila)	0	0	1	0	0	0	1	1	0	1	0
hsa-miR-19a	MIMAT0000073	NM_138731	MIPOL1	mirror-image polydactyly 1	0	0	0	0	0	0	1	1	0	1	1
hsa-miR-19a	MIMAT0000073	NM_207293	MBNL1	muscleblind-like (Drosophila)	0	0	1	0	0	0	1	1	0	1	0
hsa-miR-19a	MIMAT0000073	NM_207292	MBNL1	muscleblind-like (Drosophila)	0	0	1	0	0	0	1	1	0	1	0
hsa-miR-19a	MIMAT0000073	NM_022444	SLC13A1	solute carrier family 13 (sodium/sulfate symporters), member 1	0	0	1	1	0	0	0	1	0	1	0
hsa-miR-19a	MIMAT0000073	NM_207015	NAALADL2	N-acetylated alpha-linked acidic dipeptidase-like 2	0	0	1	1	0	0	0	1	0	1	0
hsa-miR-19a	MIMAT0000073	NM_145206	VTI1A	vesicle transport through interaction with t-SNAREs homolog 1A (yeast)	0	0	1	1	0	0	0	1	0	0	1
hsa-miR-19a	MIMAT0000073	NM_207296	MBNL1	muscleblind-like (Drosophila)	0	0	1	0	0	0	1	1	0	1	0
hsa-miR-19a	MIMAT0000073	NM_022123	NPAS3	neuronal PAS domain protein 3	0	0	0	0	0	0	1	1	0	1	1
hsa-miR-19a	MIMAT0000073	NM_213589	RAPH1	Ras association (RalGDS/AF-6) and pleckstrin homology domains 1	0	0	0	0	0	0	1	1	0	1	1
hsa-miR-19a	MIMAT0000073	NM_207517	ADAMTSL3	ADAMTS-like 3	0	0	0	0	0	0	1	1	0	1	1
hsa-miR-19a	MIMAT0000073	NM_207481	NAP5	Nck-associated protein 5	0	0	1	1	0	0	0	1	0	1	0
hsa-miR-19a	MIMAT0000073	NM_144571	CNOT6L	CCR4-NOT transcription complex, subunit 6-like	0	0	0	1	0	0	0	1	0	1	1
hsa-miR-19a	MIMAT0000073	NM_207333	ZNF320	zinc finger protein 320	0	0	1	1	0	0	0	1	0	1	0
hsa-miR-19a	MIMAT0000073	NM_021979	HSPA2	heat shock 70kDa protein 2	0	0	1	1	0	0	0	1	0	1	0
hsa-miR-19a	MIMAT0000073	NM_021998	ZNF711	zinc finger protein 711	0	0	1	0	0	0	0	1	0	1	1
hsa-miR-19a	MIMAT0000073	NM_138971	BACE1	beta-site APP-cleaving enzyme 1	0	0	1	0	0	0	1	1	0	1	0
hsa-miR-19a	MIMAT0000073	NM_144632	TMEM182	transmembrane protein 182	0	0	1	1	0	0	0	1	0	1	0
hsa-miR-19a	MIMAT0000073	NM_207304	MBNL2	muscleblind-like 2 (Drosophila)	0	0	0	1	0	0	1	1	0	1	0
hsa-miR-19a	MIMAT0000073	NM_022650	RASA1	RAS p21 protein activator (GTPase activating protein) 1	0	0	1	1	0	0	0	1	0	1	0
hsa-miR-19a	MIMAT0000073	NM_022735	ACBD3	acyl-Coenzyme A binding domain containing 3	0	0	1	0	0	0	0	1	0	1	1
hsa-miR-19a	MIMAT0000073	NM_203505	G3BP2	GTPase activating protein (SH3 domain) binding protein 2	0	0	1	0	0	0	1	1	0	1	0
hsa-miR-19a	MIMAT0000073	NM_203504	G3BP2	GTPase activating protein (SH3 domain) binding protein 2	0	0	1	0	0	0	1	1	0	1	0
hsa-miR-19a	MIMAT0000073	NM_203371	FIBIN	fin bud initiation factor	0	0	1	1	0	0	0	1	0	1	0
hsa-miR-19a	MIMAT0000073	NM_203350	ZRANB2	zinc finger, RAN-binding domain containing 2	0	0	0	0	0	0	1	1	0	1	1
hsa-miR-19a	MIMAT0000073	NM_203292	RBBP8	retinoblastoma binding protein 8	0	0	0	1	0	0	1	1	0	1	0
hsa-miR-19a	MIMAT0000073	NM_022977	ACSL4	acyl-CoA synthetase long-chain family member 4	0	0	0	1	0	0	1	1	0	1	0
hsa-miR-19a	MIMAT0000073	NM_023924	BRD9	bromodomain containing 9	0	0	1	1	0	0	0	1	0	1	0
hsa-miR-19a	MIMAT0000073	NM_203291	RBBP8	retinoblastoma binding protein 8	0	0	0	1	0	0	1	1	0	1	0
hsa-miR-19a	MIMAT0000073	NM_201267	NRP2	neuropilin 2	0	0	1	0	0	0	1	1	0	1	0
hsa-miR-19a	MIMAT0000073	NM_199414	PRC1	protein regulator of cytokinesis 1	0	0	1	0	0	0	1	1	0	1	0
hsa-miR-19a	MIMAT0000073	NM_138418	C16orf14	chromosome 16 open reading frame 14	0	0	0	0	0	0	1	1	0	1	1
hsa-miR-19a	MIMAT0000073	NM_205848	SYT6	synaptotagmin VI	0	0	1	1	0	0	0	1	0	1	0
hsa-miR-19a	MIMAT0000073	NM_138728	ST7L	suppression of tumorigenicity 7 like	0	0	1	1	0	0	0	1	0	1	0
hsa-miR-19a	MIMAT0000073	NM_138727	ST7L	suppression of tumorigenicity 7 like	0	0	1	1	0	0	0	1	0	1	0
hsa-miR-19a	MIMAT0000073	NM_206857	RTN1	reticulon 1	0	0	0	1	0	0	1	1	0	1	0
hsa-miR-19a	MIMAT0000073	NM_022753	S100PBP	S100P binding protein	0	0	1	1	0	0	0	1	0	1	0
hsa-miR-19a	MIMAT0000073	NM_138459	NUS1	nuclear undecaprenyl pyrophosphate synthase 1 homolog (S. cerevisiae)	0	0	1	0	0	0	0	1	0	1	1
hsa-miR-19a	MIMAT0000073	NM_022763	FNDC3B	fibronectin type III domain containing 3B	0	0	0	0	0	0	1	1	0	1	1
hsa-miR-19a	MIMAT0000073	NM_138426	GLCCI1	glucocorticoid induced transcript 1	0	0	1	0	0	0	0	1	0	1	1
hsa-miR-19a	MIMAT0000073	NM_175058	PLEKHA7	pleckstrin homology domain containing, family A member 7	0	0	0	0	0	0	1	1	0	1	1
hsa-miR-19a	MIMAT0000073	NM_206853	QKI	quaking homolog, KH domain RNA binding (mouse)	0	0	0	1	0	0	1	1	0	1	0
hsa-miR-19a	MIMAT0000073	NM_206852	RTN1	reticulon 1	0	0	0	1	0	0	1	1	0	1	0
hsa-miR-19a	MIMAT0000073	NM_023925	CAPRIN2	caprin family member 2	0	0	0	1	0	0	1	1	0	1	0
hsa-miR-19a	MIMAT0000073	NM_198268	HIPK1	homeodomain interacting protein kinase 1	0	0	1	0	0	0	1	1	0	1	0
hsa-miR-19a	MIMAT0000073	NM_173598	KSR2	kinase suppressor of ras 2	0	0	1	1	0	0	0	1	0	1	0
hsa-miR-19a	MIMAT0000073	NM_153377	LRIG3	leucine-rich repeats and immunoglobulin-like domains 3	0	0	1	1	0	0	0	1	0	1	0
hsa-miR-19a	MIMAT0000073	NM_173496	MPP7	membrane protein, palmitoylated 7 (MAGUK p55 subfamily member 7)	0	0	1	1	0	0	0	1	0	1	0
hsa-miR-19a	MIMAT0000073	NM_032199	ARID5B	AT rich interactive domain 5B (MRF1-like)	0	0	1	0	0	0	0	1	0	1	1
hsa-miR-19a	MIMAT0000073	NM_032208	ANTXR1	anthrax toxin receptor 1	0	0	1	1	0	0	0	1	0	1	0
hsa-miR-19a	MIMAT0000073	NM_032229	SLITRK6	SLIT and NTRK-like family, member 6	0	0	0	0	0	0	1	1	0	1	1
hsa-miR-19a	MIMAT0000073	NM_032283	ZDHHC18	zinc finger, DHHC-type containing 18	0	0	0	0	0	0	1	1	0	1	1
hsa-miR-19a	MIMAT0000073	NM_153607	C5orf41	chromosome 5 open reading frame 41	0	0	1	0	0	0	0	1	0	1	1
hsa-miR-19a	MIMAT0000073	NM_153619	SEMA6D	sema domain, transmembrane domain (TM), and cytoplasmic domain, (semaphorin) 6D	0	0	0	0	0	0	1	1	0	1	1
hsa-miR-19a	MIMAT0000073	NM_033360	KRAS	v-Ki-ras2 Kirsten rat sarcoma viral oncogene homolog	0	0	1	0	0	0	1	1	0	1	0
hsa-miR-19a	MIMAT0000073	NM_153343	ENPP6	ectonucleotide pyrophosphatase/phosphodiesterase 6	0	0	1	1	0	0	0	1	0	1	0
hsa-miR-19a	MIMAT0000073	NM_153271	SNX33	sorting nexin 33	0	0	0	0	0	0	1	1	0	1	1
hsa-miR-19a	MIMAT0000073	NM_173797	PAPD4	PAP associated domain containing 4	0	0	0	0	0	0	1	1	0	1	1
hsa-miR-19a	MIMAT0000073	NM_175056	ZPLD1	zona pellucida-like domain containing 1	0	0	1	1	0	0	0	1	0	1	0
hsa-miR-19a	MIMAT0000073	NM_031866	FZD8	frizzled homolog 8 (Drosophila)	0	0	1	0	0	0	0	1	0	1	1
hsa-miR-19a	MIMAT0000073	NM_152774	TMEM196	transmembrane protein 196	0	0	1	1	0	0	0	1	0	1	0
hsa-miR-19a	MIMAT0000073	NM_152989	SOX5	SRY (sex determining region Y)-box 5	0	0	1	0	0	0	1	1	0	1	0
hsa-miR-19a	MIMAT0000073	NM_174902	LDLRAD3	low density lipoprotein receptor class A domain containing 3	0	0	1	1	0	0	0	1	0	1	0
hsa-miR-19a	MIMAT0000073	NM_033644	FBXW11	F-box and WD repeat domain containing 11	0	0	1	1	0	0	0	1	0	1	0
hsa-miR-19a	MIMAT0000073	NM_152999	STEAP2	six transmembrane epithelial antigen of the prostate 2	0	0	1	1	0	0	0	1	0	1	0
hsa-miR-19a	MIMAT0000073	NM_032116	KATNAL1	katanin p60 subunit A-like 1	0	0	1	1	0	0	0	1	0	1	0
hsa-miR-19a	MIMAT0000073	NM_173849	GSC	goosecoid homeobox	0	0	0	0	0	0	1	1	0	1	1
hsa-miR-19a	MIMAT0000073	NM_173809	BLOC1S2	biogenesis of lysosome-related organelles complex-1, subunit 2	0	0	1	1	0	0	0	1	0	1	0
hsa-miR-19a	MIMAT0000073	NM_033326	SOX6	SRY (sex determining region Y)-box 6	0	0	1	1	0	0	0	1	0	1	0
hsa-miR-19a	MIMAT0000073	NM_033305	VPS13A	vacuolar protein sorting 13 homolog A (S. cerevisiae)	0	0	1	1	0	0	0	1	0	1	0
hsa-miR-19a	MIMAT0000073	NM_032983	CASP2	caspase 2, apoptosis-related cysteine peptidase (neural precursor cell expressed, developmentally down-regulated 2)	0	0	1	1	0	0	0	1	0	1	0
hsa-miR-19a	MIMAT0000073	NM_170774	RASSF2	Ras association (RalGDS/AF-6) domain family member 2	0	0	1	1	0	0	0	1	0	1	0
hsa-miR-19a	MIMAT0000073	NM_170695	TGIF1	TGFB-induced factor homeobox 1	0	0	0	1	0	0	1	1	0	1	0
hsa-miR-19a	MIMAT0000073	NM_170663	MINK1	misshapen-like kinase 1 (zebrafish)	0	0	1	0	0	0	1	1	0	1	0
hsa-miR-19a	MIMAT0000073	NM_033228	TRIM23	tripartite motif-containing 23	0	0	1	1	0	0	0	1	0	1	0
hsa-miR-19a	MIMAT0000073	NM_033020	TRIM33	tripartite motif-containing 33	0	0	1	1	0	0	0	1	0	1	0
hsa-miR-19a	MIMAT0000073	NM_033227	TRIM23	tripartite motif-containing 23	0	0	1	1	0	0	0	1	0	1	0
hsa-miR-19a	MIMAT0000073	NM_153647	SLC24A4	solute carrier family 24 (sodium/potassium/calcium exchanger), member 4	0	0	1	0	0	0	1	1	0	1	0
hsa-miR-19a	MIMAT0000073	NM_033051	SLC46A2	solute carrier family 46, member 2	0	0	1	1	0	0	0	1	0	1	0
hsa-miR-19a	MIMAT0000073	NM_033087	ALG2	asparagine-linked glycosylation 2 homolog (S. cerevisiae, alpha-1,3-mannosyltransferase)	0	0	1	1	0	0	0	1	0	1	0
hsa-miR-19a	MIMAT0000073	NM_032041	NCALD	neurocalcin delta	0	0	1	0	0	0	1	1	0	1	0
hsa-miR-19a	MIMAT0000073	NM_032975	DTNA	dystrobrevin, alpha	0	0	0	1	0	0	1	1	0	1	0
hsa-miR-19a	MIMAT0000073	NM_173063	CAST	calpastatin	0	0	1	1	0	0	0	1	0	1	0
hsa-miR-19a	MIMAT0000073	NM_173208	TGIF1	TGFB-induced factor homeobox 1	0	0	0	1	0	0	1	1	0	1	0
hsa-miR-19a	MIMAT0000073	NM_173207	TGIF1	TGFB-induced factor homeobox 1	0	0	0	1	0	0	1	1	0	1	0
hsa-miR-19a	MIMAT0000073	NM_032576	CYorf15B	chromosome Y open reading frame 15B	0	0	0	0	0	0	1	1	0	1	1
hsa-miR-19a	MIMAT0000073	NM_173176	PTK2B	PTK2B protein tyrosine kinase 2 beta	0	0	1	0	0	0	1	1	0	1	0
hsa-miR-19a	MIMAT0000073	NM_173175	PTK2B	PTK2B protein tyrosine kinase 2 beta	0	0	1	0	0	0	1	1	0	1	0
hsa-miR-19a	MIMAT0000073	NM_173174	PTK2B	PTK2B protein tyrosine kinase 2 beta	0	0	1	0	0	0	1	1	0	1	0
hsa-miR-19a	MIMAT0000073	NM_032809	FAM73B	family with sequence similarity 73, member B	0	0	0	0	0	0	1	1	0	1	1
hsa-miR-19a	MIMAT0000073	NM_173172	NR4A2	nuclear receptor subfamily 4, group A, member 2	0	0	1	0	0	0	1	1	0	1	0
hsa-miR-19a	MIMAT0000073	NM_033290	MID1	midline 1 (Opitz/BBB syndrome)	0	0	1	1	0	0	0	1	0	1	0
hsa-miR-19a	MIMAT0000073	NM_032924	ZNF3	zinc finger protein 3	0	0	1	0	0	0	1	1	0	0	1
hsa-miR-19a	MIMAT0000073	NM_033100	PCDH21	protocadherin 21	0	0	1	1	0	0	0	1	0	1	0
hsa-miR-19a	MIMAT0000073	NM_080927	DCBLD2	discoidin, CUB and LCCL domain containing 2	0	0	0	0	0	0	1	1	0	1	1
hsa-miR-19a	MIMAT0000073	NM_181874	GRM7	glutamate receptor, metabotropic 7	0	0	0	0	0	0	1	1	0	1	1
hsa-miR-19a	MIMAT0000073	NM_181838	UBE2D2	ubiquitin-conjugating enzyme E2D 2 (UBC4/5 homolog, yeast)	0	0	1	0	0	0	1	1	0	1	0
hsa-miR-19a	MIMAT0000073	NM_181609	KRTAP19-3	keratin associated protein 19-3	0	0	1	1	0	0	0	1	0	1	0
hsa-miR-19a	MIMAT0000073	NM_181500	CUX1	cut-like homeobox 1	0	0	1	1	0	0	0	1	0	1	0
hsa-miR-19a	MIMAT0000073	NM_181358	HIPK1	homeodomain interacting protein kinase 1	0	0	0	0	0	0	1	1	0	1	1
hsa-miR-19a	MIMAT0000073	NM_080764	ZNF280B	zinc finger protein 280B	0	0	1	1	0	0	0	1	0	1	0
hsa-miR-19a	MIMAT0000073	NM_181077	GOLGA8A	golgi autoantigen, golgin subfamily a, 8A	0	0	1	0	0	0	0	1	0	1	1
hsa-miR-19a	MIMAT0000073	NM_181054	HIF1A	hypoxia-inducible factor 1, alpha subunit (basic helix-loop-helix transcription factor)	0	0	0	0	0	0	1	1	0	1	1
hsa-miR-19a	MIMAT0000073	NM_178509	STXBP4	syntaxin binding protein 4	0	0	1	1	0	0	0	1	0	1	0
hsa-miR-19a	MIMAT0000073	NM_178496	C3orf59	chromosome 3 open reading frame 59	0	0	0	0	0	0	1	1	0	1	1
hsa-miR-19a	MIMAT0000073	NM_182511	CBLN2	cerebellin 2 precursor	0	0	0	1	0	0	1	1	0	0	1
hsa-miR-19a	MIMAT0000073	NM_152624	DCP2	DCP2 decapping enzyme homolog (S. cerevisiae)	0	0	1	0	0	0	0	1	0	1	1
hsa-miR-19a	MIMAT0000073	NM_152470	RNF165	ring finger protein 165	0	0	1	0	0	0	0	1	0	1	1
hsa-miR-19a	MIMAT0000073	NM_024790	CSPP1	centrosome and spindle pole associated protein 1	0	0	1	1	0	0	0	1	0	1	0
hsa-miR-19a	MIMAT0000073	NM_182948	PRKACB	protein kinase, cAMP-dependent, catalytic, beta	0	0	1	0	0	0	1	1	0	1	0
hsa-miR-19a	MIMAT0000073	NM_182907	PRDM1	PR domain containing 1, with ZNF domain	0	0	1	0	0	0	1	1	0	1	0
hsa-miR-19a	MIMAT0000073	NM_182749	N6AMT1	N-6 adenine-specific DNA methyltransferase 1 (putative)	0	0	1	1	0	0	0	1	0	1	0
hsa-miR-19a	MIMAT0000073	NM_025074	FRAS1	Fraser syndrome 1	0	0	1	1	0	0	0	1	0	1	0
hsa-miR-19a	MIMAT0000073	NM_025147	COQ10B	coenzyme Q10 homolog B (S. cerevisiae)	0	0	1	1	0	0	0	1	0	1	0
hsa-miR-19a	MIMAT0000073	NM_182734	PLCB1	phospholipase C, beta 1 (phosphoinositide-specific)	0	0	0	0	0	0	1	1	0	1	1
hsa-miR-19a	MIMAT0000073	NM_182643	DLC1	deleted in liver cancer 1	0	0	1	0	0	0	1	1	0	1	0
hsa-miR-19a	MIMAT0000073	NM_182641	BPTF	bromodomain PHD finger transcription factor	0	0	1	0	0	0	1	1	0	1	0
hsa-miR-19a	MIMAT0000073	NM_182603	ANKRD42	ankyrin repeat domain 42	0	0	1	1	0	0	0	1	0	1	0
hsa-miR-19a	MIMAT0000073	NM_058241	CCNT2	cyclin T2	0	0	1	0	0	0	1	1	0	1	0
hsa-miR-19a	MIMAT0000073	NM_053056	CCND1	cyclin D1	0	0	1	0	0	0	0	1	0	1	1
hsa-miR-19a	MIMAT0000073	NM_176812	CHMP4B	chromatin modifying protein 4B	0	0	0	0	0	0	1	1	0	1	1
hsa-miR-19a	MIMAT0000073	NM_031442	TMEM47	transmembrane protein 47	0	0	0	0	0	0	1	1	0	1	1
hsa-miR-19a	MIMAT0000073	NM_176083	TRDMT1	tRNA aspartic acid methyltransferase 1	0	0	1	1	0	0	0	1	0	1	0
hsa-miR-19a	MIMAT0000073	NM_176081	TRDMT1	tRNA aspartic acid methyltransferase 1	0	0	1	1	0	0	0	1	0	1	0
hsa-miR-19a	MIMAT0000073	NM_031445	AMMECR1L	AMME chromosomal region gene 1-like	0	0	1	1	0	0	0	1	0	1	0
hsa-miR-19a	MIMAT0000073	NM_031483	ITCH	itchy E3 ubiquitin protein ligase homolog (mouse)	0	0	0	0	0	0	1	1	0	1	1
hsa-miR-19a	MIMAT0000073	NM_175871	C19orf39	chromosome 19 open reading frame 39	0	0	1	1	0	0	0	1	0	1	0
hsa-miR-19a	MIMAT0000073	NM_031857	PCDHA9	protocadherin alpha 9	0	0	1	0	0	0	1	1	0	1	0
hsa-miR-19a	MIMAT0000073	NM_033656	BRWD1	bromodomain and WD repeat domain containing 1	0	0	0	1	0	0	0	1	0	1	1
hsa-miR-19a	MIMAT0000073	NM_033645	FBXW11	F-box and WD repeat domain containing 11	0	0	1	1	0	0	0	1	0	1	0
hsa-miR-19a	MIMAT0000073	NM_176814	ZNF800	zinc finger protein 800	0	0	0	0	0	0	1	1	0	1	1
hsa-miR-19a	MIMAT0000073	NM_052943	FAM46B	family with sequence similarity 46, member B	0	0	0	0	0	0	1	1	0	1	1
hsa-miR-19a	MIMAT0000073	NM_053002	MED12L	mediator complex subunit 12-like	0	0	0	0	0	0	1	1	0	1	1
hsa-miR-19a	MIMAT0000073	NM_178120	DLX1	distal-less homeobox 1	0	0	1	0	0	0	1	1	0	1	0
hsa-miR-19a	MIMAT0000073	NM_178010	SOX5	SRY (sex determining region Y)-box 5	0	0	1	0	0	0	1	1	0	1	0
hsa-miR-19a	MIMAT0000073	NM_030938	TMEM49	transmembrane protein 49	0	0	0	0	0	0	1	1	0	1	1
hsa-miR-19a	MIMAT0000073	NM_177972	TUB	tubby homolog (mouse)	0	0	1	1	0	0	0	1	0	1	0
hsa-miR-19a	MIMAT0000073	NM_177438	DICER1	dicer 1, ribonuclease type III	0	0	1	0	0	0	1	1	0	1	0
hsa-miR-19a	MIMAT0000073	NM_031267	CDC2L5	cell division cycle 2-like 5 (cholinesterase-related cell division controller)	0	0	1	0	0	0	1	1	0	1	0
hsa-miR-19a	MIMAT0000073	NM_031296	RAB33B	RAB33B, member RAS oncogene family	0	0	0	0	0	0	1	1	0	1	1
hsa-miR-19a	MIMAT0000073	NM_053024	PFN2	profilin 2	0	0	1	0	0	0	1	1	0	1	0
hsa-miR-19a	MIMAT0000073	NM_031371	ARID4B	AT rich interactive domain 4B (RBP1-like)	0	0	1	0	0	0	1	1	0	1	0
hsa-miR-19a	MIMAT0000073	NM_053023	ZFP91	zinc finger protein 91 homolog (mouse)	0	0	0	0	0	0	1	1	0	1	1
hsa-miR-19a	MIMAT0000073	NM_152756	RICTOR	rapamycin-insensitive companion of mTOR	0	0	1	0	0	0	0	1	0	1	1
hsa-miR-19a	MIMAT0000073	NM_001080396	FAM155A	family with sequence similarity 155, member A	0	0	1	1	0	0	0	1	0	1	0
hsa-miR-19a	MIMAT0000073	NM_001877	CR2	complement component (3d/Epstein Barr virus) receptor 2	0	0	1	1	0	0	0	1	0	1	0
hsa-miR-19a	MIMAT0000073	NM_001913	CUX1	cut-like homeobox 1	0	0	1	1	0	0	0	1	0	1	0
hsa-miR-19a	MIMAT0000073	NM_001918	DBT	dihydrolipoamide branched chain transacylase E2	0	0	1	1	0	0	0	1	0	1	0
hsa-miR-19a	MIMAT0000073	NM_001967	EIF4A2	eukaryotic translation initiation factor 4A, isoform 2	0	0	0	0	0	0	1	1	0	1	1
hsa-miR-19a	MIMAT0000073	NM_002056	GFPT1	glutamine-fructose-6-phosphate transaminase 1	0	0	1	1	0	0	0	1	0	1	0
hsa-miR-19a	MIMAT0000073	NM_002069	GNAI1	guanine nucleotide binding protein (G protein), alpha inhibiting activity polypeptide 1	0	0	0	0	0	0	1	1	0	1	1
hsa-miR-19a	MIMAT0000073	NM_002092	GRSF1	G-rich RNA sequence binding factor 1	0	0	1	0	0	0	0	1	0	1	1
hsa-miR-19a	MIMAT0000073	NM_002126	HLF	hepatic leukemia factor	0	0	0	0	0	0	1	1	0	1	1
hsa-miR-19a	MIMAT0000073	NM_002197	ACO1	aconitase 1, soluble	0	0	1	1	0	0	0	1	0	1	0
hsa-miR-19a	MIMAT0000073	NM_002203	ITGA2	integrin, alpha 2 (CD49B, alpha 2 subunit of VLA-2 receptor)	0	0	1	1	0	0	0	1	0	1	0
hsa-miR-19a	MIMAT0000073	NM_002221	ITPKB	inositol 1,4,5-trisphosphate 3-kinase B	0	0	0	0	0	0	1	1	0	1	1
hsa-miR-19a	MIMAT0000073	NM_002381	MATN3	matrilin 3	0	0	1	1	0	0	0	1	0	1	0
hsa-miR-19a	MIMAT0000073	NM_002393	MDM4	Mdm4 p53 binding protein homolog (mouse)	0	0	1	1	0	0	0	1	0	1	0
hsa-miR-19a	MIMAT0000073	NM_002397	MEF2C	myocyte enhancer factor 2C	0	0	0	0	0	0	1	1	0	1	1
hsa-miR-19a	MIMAT0000073	NM_002430	MN1	meningioma (disrupted in balanced translocation) 1	0	0	0	0	0	0	1	1	0	1	1
hsa-miR-19a	MIMAT0000073	NM_002480	PPP1R12A	protein phosphatase 1, regulatory (inhibitor) subunit 12A	0	0	0	0	0	0	1	1	0	1	1
hsa-miR-19a	MIMAT0000073	NM_002628	PFN2	profilin 2	0	0	0	0	0	0	1	1	0	1	1
hsa-miR-19a	MIMAT0000073	NM_001860	SLC31A2	solute carrier family 31 (copper transporters), member 2	0	0	0	1	0	0	0	1	0	1	1
hsa-miR-19a	MIMAT0000073	NM_001842	CNTFR	ciliary neurotrophic factor receptor	0	0	0	0	0	0	1	1	0	1	1
hsa-miR-19a	MIMAT0000073	NM_001816	CEACAM8	carcinoembryonic antigen-related cell adhesion molecule 8	0	0	1	1	0	0	0	1	0	1	0
hsa-miR-19a	MIMAT0000073	NM_001080416	MYBL1	v-myb myeloblastosis viral oncogene homolog (avian)-like 1	0	0	1	0	0	0	0	1	0	1	1
hsa-miR-19a	MIMAT0000073	NM_001080450	KIAA1553	KIAA1553	0	0	1	0	0	0	0	1	0	1	1
hsa-miR-19a	MIMAT0000073	NM_001081676	SCN3A	sodium channel, voltage-gated, type III, alpha subunit	0	0	1	1	0	0	0	1	0	1	0
hsa-miR-19a	MIMAT0000073	NM_001081677	SCN3A	sodium channel, voltage-gated, type III, alpha subunit	0	0	1	1	0	0	0	1	0	1	0
hsa-miR-19a	MIMAT0000073	NM_001082577	RBM9	RNA binding motif protein 9	0	0	1	0	0	0	0	1	0	1	1
hsa-miR-19a	MIMAT0000073	NM_001126	ADSS	adenylosuccinate synthase	0	0	0	1	0	0	0	1	0	1	1
hsa-miR-19a	MIMAT0000073	NM_001128	AP1G1	adaptor-related protein complex 1, gamma 1 subunit	0	0	1	0	0	0	1	1	0	1	0
hsa-miR-19a	MIMAT0000073	NM_001271	CHD2	chromodomain helicase DNA binding protein 2	0	0	1	1	0	0	0	1	0	1	0
hsa-miR-19a	MIMAT0000073	NM_001298	CNGA3	cyclic nucleotide gated channel alpha 3	0	0	1	1	0	0	0	1	0	1	0
hsa-miR-19a	MIMAT0000073	NM_001508	GPR39	G protein-coupled receptor 39	0	0	1	1	0	0	0	1	0	1	0
hsa-miR-19a	MIMAT0000073	NM_001542	IGSF3	immunoglobulin superfamily, member 3	0	0	1	1	0	0	0	1	0	1	0
hsa-miR-19a	MIMAT0000073	NM_001656	TRIM23	tripartite motif-containing 23	0	0	1	1	0	0	0	1	0	1	0
hsa-miR-19a	MIMAT0000073	NM_001698	AUH	AU RNA binding protein/enoyl-Coenzyme A hydratase	0	0	0	0	0	0	1	1	0	1	1
hsa-miR-19a	MIMAT0000073	NM_001731	BTG1	B-cell translocation gene 1, anti-proliferative	0	0	0	0	0	0	1	1	0	1	1
hsa-miR-19a	MIMAT0000073	NM_001750	CAST	calpastatin	0	0	1	1	0	0	0	1	0	1	0
hsa-miR-19a	MIMAT0000073	NM_001777	CD47	CD47 molecule	0	0	1	1	0	0	0	1	0	1	0
hsa-miR-19a	MIMAT0000073	NM_001781	CD69	CD69 molecule	0	0	0	0	0	0	1	1	0	1	1
hsa-miR-19a	MIMAT0000073	NM_002653	PITX1	paired-like homeodomain 1	0	0	0	0	0	0	1	1	0	1	1
hsa-miR-19a	MIMAT0000073	NM_002655	PLAG1	pleiomorphic adenoma gene 1	0	0	0	0	0	0	1	1	0	1	1
hsa-miR-19a	MIMAT0000073	NM_002713	PPP1R8	protein phosphatase 1, regulatory (inhibitor) subunit 8	0	0	1	0	0	0	1	1	0	1	0
hsa-miR-19a	MIMAT0000073	NM_003772	JRKL	jerky homolog-like (mouse)	0	0	1	1	0	0	0	1	0	1	0
hsa-miR-19a	MIMAT0000073	NM_003874	CD84	CD84 molecule	0	0	1	1	0	0	0	1	0	1	0
hsa-miR-19a	MIMAT0000073	NM_003887	DDEF2	development and differentiation enhancing factor 2	0	0	0	0	0	0	1	1	0	1	1
hsa-miR-19a	MIMAT0000073	NM_003945	ATP6V0E1	ATPase, H+ transporting, lysosomal 9kDa, V0 subunit e1	0	0	1	1	0	0	0	1	0	1	0
hsa-miR-19a	MIMAT0000073	NM_004034	ANXA7	annexin A7	0	0	0	1	0	0	1	1	0	1	0
hsa-miR-19a	MIMAT0000073	NM_004056	CA8	carbonic anhydrase VIII	0	0	0	0	0	0	1	1	0	1	1
hsa-miR-19a	MIMAT0000073	NM_004098	EMX2	empty spiracles homeobox 2	0	0	1	0	0	0	1	1	0	0	1
hsa-miR-19a	MIMAT0000073	NM_004136	IREB2	iron-responsive element binding protein 2	0	0	1	1	0	0	0	1	0	1	0
hsa-miR-19a	MIMAT0000073	NM_004232	SOCS6	suppressor of cytokine signaling 6	0	0	1	0	0	0	0	1	0	1	1
hsa-miR-19a	MIMAT0000073	NM_004253	PLAA	phospholipase A2-activating protein	0	0	1	0	0	0	1	1	0	0	1
hsa-miR-19a	MIMAT0000073	NM_004350	RUNX3	runt-related transcription factor 3	0	0	1	0	0	0	1	1	0	1	0
hsa-miR-19a	MIMAT0000073	NM_004412	TRDMT1	tRNA aspartic acid methyltransferase 1	0	0	1	1	0	0	0	1	0	1	0
hsa-miR-19a	MIMAT0000073	NM_004432	ELAVL2	ELAV (embryonic lethal, abnormal vision, Drosophila)-like 2 (Hu antigen B)	0	0	1	0	0	0	0	1	0	1	1
hsa-miR-19a	MIMAT0000073	NM_004434	EML1	echinoderm microtubule associated protein like 1	0	0	1	1	0	0	0	1	0	1	0
hsa-miR-19a	MIMAT0000073	NM_004501	HNRNPU	heterogeneous nuclear ribonucleoprotein U (scaffold attachment factor A)	0	0	1	0	0	0	0	1	0	1	1
hsa-miR-19a	MIMAT0000073	NM_004598	SPOCK1	sparc/osteonectin, cwcv and kazal-like domains proteoglycan (testican) 1	0	0	1	1	0	0	0	1	0	1	0
hsa-miR-19a	MIMAT0000073	NM_004614	TK2	thymidine kinase 2, mitochondrial	0	0	1	1	0	0	0	1	0	1	0
hsa-miR-19a	MIMAT0000073	NM_003747	TNKS	tankyrase, TRF1-interacting ankyrin-related ADP-ribose polymerase	0	0	0	1	0	0	0	1	0	1	1
hsa-miR-19a	MIMAT0000073	NM_003722	TP63	tumor protein p63	0	0	0	0	0	0	1	1	0	1	1
hsa-miR-19a	MIMAT0000073	NM_003663	CGGBP1	CGG triplet repeat binding protein 1	0	0	1	1	0	0	0	1	0	1	0
hsa-miR-19a	MIMAT0000073	NM_002778	PSAP	prosaposin (variant Gaucher disease and variant metachromatic leukodystrophy)	0	0	0	1	0	0	1	1	0	1	0
hsa-miR-19a	MIMAT0000073	NM_002784	PSG9	pregnancy specific beta-1-glycoprotein 9	0	0	1	1	0	0	0	1	0	1	0
hsa-miR-19a	MIMAT0000073	NM_002868	RAB5B	RAB5B, member RAS oncogene family	0	0	0	0	0	0	1	1	0	1	1
hsa-miR-19a	MIMAT0000073	NM_002890	RASA1	RAS p21 protein activator (GTPase activating protein) 1	0	0	1	1	0	0	0	1	0	1	0
hsa-miR-19a	MIMAT0000073	NM_002894	RBBP8	retinoblastoma binding protein 8	0	0	0	1	0	0	1	1	0	1	0
hsa-miR-19a	MIMAT0000073	NM_002942	ROBO2	roundabout, axon guidance receptor, homolog 2 (Drosophila)	0	0	0	1	0	0	0	1	0	1	1
hsa-miR-19a	MIMAT0000073	NM_003047	SLC9A1	solute carrier family 9 (sodium/hydrogen exchanger), member 1 (antiporter, Na+/H+, amiloride sensitive)	0	0	1	0	0	0	0	1	0	1	1
hsa-miR-19a	MIMAT0000073	NM_003048	SLC9A2	solute carrier family 9 (sodium/hydrogen exchanger), member 2	0	0	1	0	0	0	0	1	0	1	1
hsa-miR-19a	MIMAT0000073	NM_003126	SPTA1	spectrin, alpha, erythrocytic 1 (elliptocytosis 2)	0	0	1	1	0	0	0	1	0	1	0
hsa-miR-19a	MIMAT0000073	NM_003243	TGFBR3	transforming growth factor, beta receptor III	0	0	1	1	0	0	0	1	0	1	0
hsa-miR-19a	MIMAT0000073	NM_003328	TXK	TXK tyrosine kinase	0	0	1	1	0	0	0	1	0	1	0
hsa-miR-19a	MIMAT0000073	NM_003356	UCP3	uncoupling protein 3 (mitochondrial, proton carrier)	0	0	1	0	0	0	1	1	0	0	1
hsa-miR-19a	MIMAT0000073	NM_003566	EEA1	early endosome antigen 1	0	0	0	0	0	0	1	1	0	1	1
hsa-miR-19a	MIMAT0000073	NM_003590	CUL3	cullin 3	0	0	1	1	0	0	0	1	0	1	0
hsa-miR-19a	MIMAT0000073	NM_003615	SLC4A7	solute carrier family 4, sodium bicarbonate cotransporter, member 7	0	0	1	1	0	0	0	1	0	1	0
hsa-miR-19a	MIMAT0000073	NM_003618	MAP4K3	mitogen-activated protein kinase kinase kinase kinase 3	0	0	1	1	0	0	0	1	0	1	0
hsa-miR-19a	MIMAT0000073	NM_003633	ENC1	ectodermal-neural cortex (with BTB-like domain)	0	0	1	1	0	0	0	1	0	1	0
hsa-miR-19a	MIMAT0000073	NM_004660	DDX3Y	DEAD (Asp-Glu-Ala-Asp) box polypeptide 3, Y-linked	0	0	0	1	0	0	0	1	0	1	1
hsa-miR-19a	MIMAT0000073	NM_000194	HPRT1	hypoxanthine phosphoribosyltransferase 1 (Lesch-Nyhan syndrome)	0	0	1	1	0	0	0	1	0	1	0
hsa-miR-19a	MIMAT0000073	NM_001006657	WDR35	WD repeat domain 35	0	0	1	1	0	0	0	1	0	1	0
hsa-miR-19a	MIMAT0000073	NM_001006658	CR2	complement component (3d/Epstein Barr virus) receptor 2	0	0	1	1	0	0	0	1	0	1	0
hsa-miR-19a	MIMAT0000073	NM_001006932	RPS6KA2	ribosomal protein S6 kinase, 90kDa, polypeptide 2	0	0	1	1	0	0	0	1	0	1	0
hsa-miR-19a	MIMAT0000073	NM_001007102	L3MBTL3	l(3)mbt-like 3 (Drosophila)	0	0	1	0	0	0	0	1	0	1	1
hsa-miR-19a	MIMAT0000073	NM_001008225	CNOT4	CCR4-NOT transcription complex, subunit 4	0	0	1	1	0	0	0	1	0	1	0
hsa-miR-19a	MIMAT0000073	NM_001008390	CGGBP1	CGG triplet repeat binding protein 1	0	0	1	1	0	0	0	1	0	1	0
hsa-miR-19a	MIMAT0000073	NM_001008495	TMEM64	transmembrane protein 64	0	0	1	0	0	0	0	1	0	1	1
hsa-miR-19a	MIMAT0000073	NM_001008707	EML1	echinoderm microtubule associated protein like 1	0	0	1	1	0	0	0	1	0	1	0
hsa-miR-19a	MIMAT0000073	NM_001010935	RAP1A	RAP1A, member of RAS oncogene family	0	0	0	1	0	0	0	1	0	1	1
hsa-miR-19a	MIMAT0000073	NM_001010942	RAP1B	RAP1B, member of RAS oncogene family	0	0	0	1	0	0	0	1	0	1	1
hsa-miR-19a	MIMAT0000073	NM_001011553	SEPT7	septin 7	0	0	0	1	0	0	0	1	0	1	1
hsa-miR-19a	MIMAT0000073	NM_001012420	GOLGA8G	golgi autoantigen, golgin subfamily a, 8G	0	0	1	1	0	0	0	0	0	1	1
hsa-miR-19a	MIMAT0000073	NM_001012423	GOLGA8E	golgi autoantigen, golgin subfamily a, 8E	0	0	0	1	0	0	0	1	0	1	1
hsa-miR-19a	MIMAT0000073	NM_001012452	FLJ32679	golgin-like hypothetical protein LOC440321	0	0	1	1	0	0	0	0	0	1	1
hsa-miR-19a	MIMAT0000073	NM_001013398	IGFBP3	insulin-like growth factor binding protein 3	0	0	1	1	0	0	0	1	0	1	0
hsa-miR-19a	MIMAT0000073	NM_001014380	KATNAL1	katanin p60 subunit A-like 1	0	0	1	1	0	0	0	1	0	1	0
hsa-miR-19a	MIMAT0000073	NM_001015051	RUNX2	runt-related transcription factor 2	0	0	1	0	0	0	0	1	0	1	1
hsa-miR-19a	MIMAT0000073	NM_001005417	B4GALT2	UDP-Gal:betaGlcNAc beta 1,4- galactosyltransferase, polypeptide 2	0	0	0	0	0	0	1	1	0	1	1
hsa-miR-19a	MIMAT0000073	NM_001004354	NRARP	Notch-regulated ankyrin repeat protein	0	0	0	0	0	0	1	1	0	1	1
hsa-miR-19a	MIMAT0000073	NM_001003793	RBMS3	RNA binding motif, single stranded interacting protein	0	0	1	0	0	0	1	1	0	1	0
hsa-miR-19a	MIMAT0000073	NM_000210	ITGA6	integrin, alpha 6	0	0	0	0	0	0	1	1	0	1	1
hsa-miR-19a	MIMAT0000073	NM_000222	KIT	v-kit Hardy-Zuckerman 4 feline sarcoma viral oncogene homolog	0	0	0	0	0	0	1	1	0	1	1
hsa-miR-19a	MIMAT0000073	NM_000351	STS	steroid sulfatase (microsomal), isozyme S	0	0	1	1	0	0	0	1	0	1	0
hsa-miR-19a	MIMAT0000073	NM_000369	TSHR	thyroid stimulating hormone receptor	0	0	1	1	0	0	0	1	0	1	0
hsa-miR-19a	MIMAT0000073	NM_000381	MID1	midline 1 (Opitz/BBB syndrome)	0	0	1	1	0	0	0	1	0	1	0
hsa-miR-19a	MIMAT0000073	NM_000441	SLC26A4	solute carrier family 26, member 4	0	0	1	1	0	0	0	1	0	1	0
hsa-miR-19a	MIMAT0000073	NM_000527	LDLR	low density lipoprotein receptor (familial hypercholesterolemia)	0	0	1	1	0	0	0	1	0	1	0
hsa-miR-19a	MIMAT0000073	NM_000702	ATP1A2	ATPase, Na+/K+ transporting, alpha 2 (+) polypeptide	0	0	1	1	0	0	0	1	0	1	0
hsa-miR-19a	MIMAT0000073	NM_000813	GABRB2	gamma-aminobutyric acid (GABA) A receptor, beta 2	0	0	1	0	0	0	0	1	0	1	1
hsa-miR-19a	MIMAT0000073	NM_000817	GAD1	glutamate decarboxylase 1 (brain, 67kDa)	0	0	0	0	0	0	1	1	0	1	1
hsa-miR-19a	MIMAT0000073	NM_000833	GRIN2A	glutamate receptor, ionotropic, N-methyl D-aspartate 2A	0	0	1	0	0	0	0	1	0	1	1
hsa-miR-19a	MIMAT0000073	NM_000844	GRM7	glutamate receptor, metabotropic 7	0	0	1	0	0	0	1	1	0	1	0
hsa-miR-19a	MIMAT0000073	NM_001001132	ITSN1	intersectin 1 (SH3 domain protein)	0	0	0	1	0	0	0	1	0	1	1
hsa-miR-19a	MIMAT0000073	NM_001001342	BLOC1S2	biogenesis of lysosome-related organelles complex-1, subunit 2	0	0	1	1	0	0	0	1	0	1	0
hsa-miR-19a	MIMAT0000073	NM_001001419	SMAD5	SMAD family member 5	0	0	0	0	0	0	1	1	0	1	1
hsa-miR-19a	MIMAT0000073	NM_001001924	MTUS1	mitochondrial tumor suppressor 1	0	0	0	0	0	0	1	1	0	1	1
hsa-miR-19a	MIMAT0000073	NM_001002259	CAPRIN2	caprin family member 2	0	0	0	1	0	0	1	1	0	1	0
hsa-miR-19a	MIMAT0000073	NM_001017424	KCNK2	potassium channel, subfamily K, member 2	0	0	1	0	0	0	0	1	0	1	1
hsa-miR-19a	MIMAT0000073	NM_001023567	GOLGA8B	golgi autoantigen, golgin subfamily a, 8B	0	0	1	0	0	0	0	1	0	1	1
hsa-miR-19a	MIMAT0000073	NM_001024680	FBXO48	F-box protein 48	0	0	1	1	0	0	0	1	0	1	0
hsa-miR-19a	MIMAT0000073	NM_001040624	NCALD	neurocalcin delta	0	0	1	0	0	0	0	1	0	1	1
hsa-miR-19a	MIMAT0000073	NM_001040665	STEAP2	six transmembrane epithelial antigen of the prostate 2	0	0	1	1	0	0	0	1	0	1	0
hsa-miR-19a	MIMAT0000073	NM_001042404	CEP170	centrosomal protein 170kDa	0	0	1	0	0	0	0	1	0	1	1
hsa-miR-19a	MIMAT0000073	NM_001042442	CAST	calpastatin	0	0	1	1	0	0	0	1	0	1	0
hsa-miR-19a	MIMAT0000073	NM_001042443	CAST	calpastatin	0	0	1	1	0	0	0	1	0	1	0
hsa-miR-19a	MIMAT0000073	NM_001042445	CAST	calpastatin	0	0	1	1	0	0	0	1	0	1	0
hsa-miR-19a	MIMAT0000073	NM_001042452	RP6-213H19.1	serine/threonine protein kinase MST4	0	0	1	1	0	0	0	1	0	1	0
hsa-miR-19a	MIMAT0000073	NM_001042453	RP6-213H19.1	serine/threonine protein kinase MST4	0	0	1	1	0	0	0	1	0	1	0
hsa-miR-19a	MIMAT0000073	NM_001042465	PSAP	prosaposin (variant Gaucher disease and variant metachromatic leukodystrophy)	0	0	0	1	0	0	0	1	0	1	1
hsa-miR-19a	MIMAT0000073	NM_001042537	SLC9A6	solute carrier family 9 (sodium/hydrogen exchanger), member 6	0	0	0	1	0	0	0	1	0	1	1
hsa-miR-19a	MIMAT0000073	NM_001042758	SRGAP2	SLIT-ROBO Rho GTPase activating protein 2	0	0	1	1	0	0	0	1	0	1	0
hsa-miR-19a	MIMAT0000073	NM_001048200	HIPK3	homeodomain interacting protein kinase 3	0	0	0	1	0	0	0	1	0	1	1
hsa-miR-19a	MIMAT0000073	NM_001077204	CSPP1	centrosome and spindle pole associated protein 1	0	0	1	1	0	0	0	1	0	1	0
hsa-miR-19a	MIMAT0000073	NM_001077498	C17orf63	chromosome 17 open reading frame 63	0	0	1	1	0	0	0	1	0	1	0
hsa-miR-19a	MIMAT0000073	NM_001077619	LOC137886	hypothetical protein LOC137886	0	0	1	1	0	0	0	1	0	1	0
hsa-miR-19a	MIMAT0000073	NM_001079673	FNDC3A	fibronectin type III domain containing 3A	0	0	1	0	0	0	0	1	0	1	1
hsa-miR-19a	MIMAT0000073	NM_001079872	CUL4B	cullin 4B	0	0	1	0	0	0	0	1	0	1	1
hsa-miR-19a	MIMAT0000073	NM_001040101	D4S234E	DNA segment on chromosome 4 (unique) 234 expressed sequence	0	0	1	1	0	0	0	1	0	1	0
hsa-miR-19a	MIMAT0000073	NM_001040100	C3orf57	chromosome 3 open reading frame 57	0	0	1	1	0	0	0	1	0	1	0
hsa-miR-19a	MIMAT0000073	NM_001039762	C10orf141	chromosome 10 open reading frame 141	0	0	1	0	0	0	0	1	0	1	1
hsa-miR-19a	MIMAT0000073	NM_001024937	MINK1	misshapen-like kinase 1 (zebrafish)	0	0	1	0	0	0	0	1	0	1	1
hsa-miR-19a	MIMAT0000073	NM_001025079	CD47	CD47 molecule	0	0	1	1	0	0	0	1	0	1	0
hsa-miR-19a	MIMAT0000073	NM_001025595	ARFIP1	ADP-ribosylation factor interacting protein 1 (arfaptin 1)	0	0	1	1	0	0	0	1	0	1	0
hsa-miR-19a	MIMAT0000073	NM_001029835	CCM2	cerebral cavernous malformation 2	0	0	0	1	0	0	0	1	0	1	1
hsa-miR-19a	MIMAT0000073	NM_001029858	SLC35F1	solute carrier family 35, member F1	0	0	1	1	0	0	0	1	0	0	1
hsa-miR-19a	MIMAT0000073	NM_001029863	C6orf120	chromosome 6 open reading frame 120	0	0	1	1	0	0	0	1	0	1	0
hsa-miR-19a	MIMAT0000073	NM_001029883	FLJ34931	similar to cDNA sequence BC027072	0	0	1	1	0	0	0	1	0	1	0
hsa-miR-19a	MIMAT0000073	NM_001029989	KIAA0101	KIAA0101	0	0	1	1	0	0	0	1	0	1	0
hsa-miR-19a	MIMAT0000073	NM_001030007	AP1G1	adaptor-related protein complex 1, gamma 1 subunit	0	0	1	0	0	0	0	1	0	1	1
hsa-miR-19a	MIMAT0000073	NM_001030055	ARHGAP5	Rho GTPase activating protein 5	0	0	1	0	0	0	0	1	0	1	1
hsa-miR-19a	MIMAT0000073	NM_001031680	RUNX3	runt-related transcription factor 3	0	0	1	0	0	0	0	1	0	1	1
hsa-miR-19a	MIMAT0000073	NM_001033117	SRGAP3	SLIT-ROBO Rho GTPase activating protein 3	0	0	1	0	0	0	0	1	0	1	1
hsa-miR-19a	MIMAT0000073	NM_001033551	TOM1L2	target of myb1-like 2 (chicken)	0	0	1	0	0	0	0	1	0	1	1
hsa-miR-19a	MIMAT0000073	NM_001033561	PHF12	PHD finger protein 12	0	0	1	0	0	0	0	1	0	1	1
hsa-miR-19a	MIMAT0000073	NM_001034841	LOC162073	hypothetical protein LOC162073	0	0	1	0	0	0	0	1	0	1	1
hsa-miR-19a	MIMAT0000073	NM_001037	SCN1B	sodium channel, voltage-gated, type I, beta	0	0	1	0	0	0	0	1	0	1	1
hsa-miR-19a	MIMAT0000073	NM_001038493	DLX1	distal-less homeobox 1	0	0	1	0	0	0	0	1	0	1	1
hsa-miR-19a	MIMAT0000073	NM_001079878	CNGA3	cyclic nucleotide gated channel alpha 3	0	0	1	1	0	0	0	1	0	1	0
hsa-miR-19a	MIMAT0000073	NM_014925	R3HDM2	R3H domain containing 2	0	0	0	0	0	0	1	1	0	1	1
hsa-miR-19a	MIMAT0000073	NM_015461	ZNF521	zinc finger protein 521	0	0	0	1	0	0	1	1	0	1	0
hsa-miR-19a	MIMAT0000073	NM_015508	TIPARP	TCDD-inducible poly(ADP-ribose) polymerase	0	0	1	1	0	0	0	1	0	1	0
hsa-miR-19a	MIMAT0000073	NM_015528	RNF167	ring finger protein 167	0	0	0	0	0	0	1	1	0	1	1
hsa-miR-19a	MIMAT0000073	NM_015595	SGEF	Src homology 3 domain-containing guanine nucleotide exchange factor	0	0	1	1	0	0	0	1	0	1	0
hsa-miR-19a	MIMAT0000073	NM_015678	NBEA	neurobeachin	0	0	0	0	0	0	1	1	0	1	1
hsa-miR-19a	MIMAT0000073	NM_015716	MINK1	misshapen-like kinase 1 (zebrafish)	0	0	1	0	0	0	1	1	0	1	0
hsa-miR-19a	MIMAT0000073	NM_015865	SLC14A1	solute carrier family 14 (urea transporter), member 1 (Kidd blood group)	0	0	1	1	0	0	0	1	0	1	0
hsa-miR-19a	MIMAT0000073	NM_015886	PI15	peptidase inhibitor 15	0	0	1	1	0	0	0	1	0	1	0
hsa-miR-19a	MIMAT0000073	NM_016006	ABHD5	abhydrolase domain containing 5	0	0	1	1	0	0	0	1	0	1	0
hsa-miR-19a	MIMAT0000073	NM_016076	FAM152A	family with sequence similarity 152, member A	0	0	0	0	0	0	1	1	0	1	1
hsa-miR-19a	MIMAT0000073	NM_016322	RAB14	RAB14, member RAS oncogene family	0	0	0	0	0	0	1	1	0	1	1
hsa-miR-19a	MIMAT0000073	NM_016329	SFMBT1	Scm-like with four mbt domains 1	0	0	1	0	0	0	1	1	0	1	0
hsa-miR-19a	MIMAT0000073	NM_016542	RP6-213H19.1	serine/threonine protein kinase MST4	0	0	1	1	0	0	0	1	0	1	0
hsa-miR-19a	MIMAT0000073	NM_016559	PEX5L	peroxisomal biogenesis factor 5-like	0	0	0	0	0	0	1	1	0	1	1
hsa-miR-19a	MIMAT0000073	NM_016620	ZNF644	zinc finger protein 644	0	0	0	0	0	0	1	1	0	1	1
hsa-miR-19a	MIMAT0000073	NM_016626	MEX3C	mex-3 homolog C (C. elegans)	0	0	0	0	0	0	1	1	0	1	1
hsa-miR-19a	MIMAT0000073	NM_016836	RBMS1	RNA binding motif, single stranded interacting protein 1	0	0	0	1	0	0	1	1	0	1	0
hsa-miR-19a	MIMAT0000073	NM_015435	RNF19A	ring finger protein 19A	0	0	1	1	0	0	0	1	0	1	0
hsa-miR-19a	MIMAT0000073	NM_015393	DKFZP564O0823	DKFZP564O0823 protein	0	0	1	0	0	0	0	1	0	1	1
hsa-miR-19a	MIMAT0000073	NM_015346	ZFYVE26	zinc finger, FYVE domain containing 26	0	0	1	0	0	0	0	1	0	1	1
hsa-miR-19a	MIMAT0000073	NM_014949	KIAA0907	KIAA0907	0	0	0	1	0	0	0	1	0	1	1
hsa-miR-19a	MIMAT0000073	NM_014969	WDR47	WD repeat domain 47	0	0	0	0	0	0	1	1	0	1	1
hsa-miR-19a	MIMAT0000073	NM_015001	SPEN	spen homolog, transcriptional regulator (Drosophila)	0	0	0	0	0	0	1	1	0	1	1
hsa-miR-19a	MIMAT0000073	NM_015040	PIP5K3	phosphatidylinositol-3-phosphate/phosphatidylinositol 5-kinase, type III	0	0	1	1	0	0	0	1	0	1	0
hsa-miR-19a	MIMAT0000073	NM_015042	ZNF609	zinc finger protein 609	0	0	1	0	0	0	0	1	0	1	1
hsa-miR-19a	MIMAT0000073	NM_015074	KIF1B	kinesin family member 1B	0	0	0	0	0	0	1	1	0	1	1
hsa-miR-19a	MIMAT0000073	NM_001080744	DGKG	diacylglycerol kinase, gamma 90kDa	0	0	1	0	0	0	0	1	0	1	1
hsa-miR-19a	MIMAT0000073	NM_015087	SPG20	spastic paraplegia 20 (Troyer syndrome)	0	0	0	0	0	0	1	1	0	1	1
hsa-miR-19a	MIMAT0000073	NM_015092	SMG1	PI-3-kinase-related kinase SMG-1	0	0	1	1	0	0	0	1	0	1	0
hsa-miR-19a	MIMAT0000073	NM_015176	FBXO28	F-box protein 28	0	0	0	0	0	0	1	1	0	1	1
hsa-miR-19a	MIMAT0000073	NM_015192	PLCB1	phospholipase C, beta 1 (phosphoinositide-specific)	0	0	1	0	0	0	1	1	0	1	0
hsa-miR-19a	MIMAT0000073	NM_015205	ATP11A	ATPase, class VI, type 11A	0	0	1	0	0	0	0	1	0	1	1
hsa-miR-19a	MIMAT0000073	NM_015208	ANKRD12	ankyrin repeat domain 12	0	0	1	0	0	0	1	1	0	1	0
hsa-miR-19a	MIMAT0000073	NM_015230	CENTD1	centaurin, delta 1	0	0	1	1	0	0	0	1	0	1	0
hsa-miR-19a	MIMAT0000073	NM_015263	DMXL2	Dmx-like 2	0	0	0	1	0	0	0	1	0	1	1
hsa-miR-19a	MIMAT0000073	NM_015271	TRIM2	tripartite motif-containing 2	0	0	1	1	0	0	0	1	0	1	0
hsa-miR-19a	MIMAT0000073	NM_015294	TRIM37	tripartite motif-containing 37	0	0	1	1	0	0	0	1	0	1	0
hsa-miR-19a	MIMAT0000073	NM_016839	RBMS1	RNA binding motif, single stranded interacting protein 1	0	0	0	1	0	0	1	1	0	1	0
hsa-miR-19a	MIMAT0000073	NM_017640	LRRC16A	leucine rich repeat containing 16A	0	0	0	0	0	0	1	1	0	1	1
hsa-miR-19a	MIMAT0000073	NM_017657	AFTPH	aftiphilin	0	0	0	1	0	0	1	1	0	1	0
hsa-miR-19a	MIMAT0000073	NM_020193	C11orf30	chromosome 11 open reading frame 30	0	0	1	0	0	0	0	1	0	1	1
hsa-miR-19a	MIMAT0000073	NM_020198	CCDC47	coiled-coil domain containing 47	0	0	0	0	0	0	1	1	0	1	1
hsa-miR-19a	MIMAT0000073	NM_020297	ABCC9	ATP-binding cassette, sub-family C (CFTR/MRP), member 9	0	0	1	1	0	0	0	1	0	1	0
hsa-miR-19a	MIMAT0000073	NM_020340	KIAA1244	KIAA1244	0	0	1	1	0	0	0	1	0	1	0
hsa-miR-19a	MIMAT0000073	NM_020346	SLC17A6	solute carrier family 17 (sodium-dependent inorganic phosphate cotransporter), member 6	0	0	0	0	0	0	1	1	0	1	1
hsa-miR-19a	MIMAT0000073	NM_020697	KCNS2	potassium voltage-gated channel, delayed-rectifier, subfamily S, member 2	0	0	0	0	0	0	1	1	0	1	1
hsa-miR-19a	MIMAT0000073	NM_020760	HECW2	HECT, C2 and WW domain containing E3 ubiquitin protein ligase 2	0	0	1	0	0	0	0	1	0	1	1
hsa-miR-19a	MIMAT0000073	NM_020779	WDR35	WD repeat domain 35	0	0	1	1	0	0	0	1	0	1	0
hsa-miR-19a	MIMAT0000073	NM_020824	ARHGAP21	Rho GTPase activating protein 21	0	0	0	0	0	0	1	1	0	1	1
hsa-miR-19a	MIMAT0000073	NM_020854	KIAA1468	KIAA1468	0	0	0	0	0	0	1	1	0	1	1
hsa-miR-19a	MIMAT0000073	NM_020935	USP37	ubiquitin specific peptidase 37	0	0	1	1	0	0	0	1	0	1	0
hsa-miR-19a	MIMAT0000073	NM_020946	DENND1A	DENN/MADD domain containing 1A	0	0	1	0	0	0	0	1	0	1	1
hsa-miR-19a	MIMAT0000073	NM_020948	MIER1	mesoderm induction early response 1 homolog (Xenopus laevis)	0	0	1	0	0	0	1	1	0	1	0
hsa-miR-19a	MIMAT0000073	NM_020964	KIAA1632	KIAA1632	0	0	1	1	0	0	0	1	0	1	0
hsa-miR-19a	MIMAT0000073	NM_020983	ADCY6	adenylate cyclase 6	0	0	1	0	0	0	1	1	0	1	0
hsa-miR-19a	MIMAT0000073	NM_021135	RPS6KA2	ribosomal protein S6 kinase, 90kDa, polypeptide 2	0	0	1	1	0	0	0	1	0	1	0
hsa-miR-19a	MIMAT0000073	NM_021140	UTX	ubiquitously transcribed tetratricopeptide repeat, X chromosome	0	0	0	0	0	0	1	1	0	1	1
hsa-miR-19a	MIMAT0000073	NM_020148	SPIRE1	spire homolog 1 (Drosophila)	0	0	1	0	0	0	0	1	0	1	1
hsa-miR-19a	MIMAT0000073	NM_020126	SPHK2	sphingosine kinase 2	0	0	0	0	0	0	1	1	0	1	1
hsa-miR-19a	MIMAT0000073	NM_019590	KIAA1217	KIAA1217	0	0	0	0	0	0	1	1	0	1	1
hsa-miR-19a	MIMAT0000073	NM_017694	FLJ20160	FLJ20160 protein	0	0	0	0	0	0	1	1	0	1	1
hsa-miR-19a	MIMAT0000073	NM_017787	C10orf26	chromosome 10 open reading frame 26	0	0	1	1	0	0	0	1	0	1	0
hsa-miR-19a	MIMAT0000073	NM_017952	PTCD3	Pentatricopeptide repeat domain 3	0	0	1	1	0	0	0	1	0	1	0
hsa-miR-19a	MIMAT0000073	NM_018000	MREG	melanoregulin	0	0	1	1	0	0	0	1	0	1	0
hsa-miR-19a	MIMAT0000073	NM_018182	C17orf63	chromosome 17 open reading frame 63	0	0	1	1	0	0	0	1	0	1	0
hsa-miR-19a	MIMAT0000073	NM_018293	ZNF654	zinc finger protein 654	0	0	1	0	0	0	0	1	0	1	1
hsa-miR-19a	MIMAT0000073	NM_018330	KIAA1598	KIAA1598	0	0	0	0	0	0	1	1	0	1	1
hsa-miR-19a	MIMAT0000073	NM_018360	CXorf15	chromosome X open reading frame 15	0	0	0	0	0	0	1	1	0	1	1
hsa-miR-19a	MIMAT0000073	NM_018361	AGPAT5	1-acylglycerol-3-phosphate O-acyltransferase 5 (lysophosphatidic acid acyltransferase, epsilon)	0	0	1	1	0	0	0	1	0	1	0
hsa-miR-19a	MIMAT0000073	NM_018402	IL26	interleukin 26	0	0	1	1	0	0	0	1	0	1	0
hsa-miR-19a	MIMAT0000073	NM_018409	LRP2BP	LRP2 binding protein	0	0	1	1	0	0	0	1	0	1	0
hsa-miR-19a	MIMAT0000073	NM_018426	TMEM63B	transmembrane protein 63B	0	0	1	0	0	0	0	1	0	1	1
hsa-miR-19a	MIMAT0000073	NM_018652	GOLGA6B	golgi autoantigen, golgin subfamily a, 6B	0	0	1	1	0	0	0	1	0	0	1
hsa-miR-19a	MIMAT0000073	NM_018902	PCDHA11	protocadherin alpha 11	0	0	0	1	0	0	1	1	0	1	0
hsa-miR-19a	MIMAT0000073	NM_018903	PCDHA12	protocadherin alpha 12	0	0	0	0	0	0	1	1	0	1	1
hsa-miR-19a	MIMAT0000073	NM_015076	CDC2L6	cell division cycle 2-like 6 (CDK8-like)	0	0	0	0	0	0	1	1	0	1	1
hsa-miR-19a	MIMAT0000073	NM_018945	PDE7B	phosphodiesterase 7B	0	0	0	0	0	0	1	1	0	1	1
hsa-miR-19a	MIMAT0000073	NM_021242	MID1IP1	MID1 interacting protein 1 (gastrulation specific G12 homolog (zebrafish))	0	0	0	0	0	0	1	1	0	1	1
hsa-miR-19a	MIMAT0000073	NM_004661	CDC23	cell division cycle 23 homolog (S. cerevisiae)	0	0	1	1	0	0	0	1	0	1	0
hsa-miR-19a	MIMAT0000073	NM_005920	MEF2D	myocyte enhancer factor 2D	0	0	1	0	0	0	0	1	0	1	1
hsa-miR-19a	MIMAT0000073	NM_006007	ZFAND5	zinc finger, AN1-type domain 5	0	0	0	0	0	0	1	1	0	1	1
hsa-miR-19a	MIMAT0000073	NM_006015	ARID1A	AT rich interactive domain 1A (SWI-like)	0	0	0	0	0	0	1	1	0	1	1
hsa-miR-19a	MIMAT0000073	NM_006237	POU4F1	POU class 4 homeobox 1	0	0	0	0	0	0	1	1	0	1	1
hsa-miR-19a	MIMAT0000073	NM_006290	TNFAIP3	tumor necrosis factor, alpha-induced protein 3	0	0	1	1	0	0	1	1	0	0	0
hsa-miR-19a	MIMAT0000073	NM_006325	RAN	RAN, member RAS oncogene family	0	0	1	1	0	0	0	1	0	1	0
hsa-miR-19a	MIMAT0000073	NM_006334	OLFM1	olfactomedin 1	0	0	1	0	0	0	1	1	0	1	0
hsa-miR-19a	MIMAT0000073	NM_006336	ZER1	zer-1 homolog (C. elegans)	0	0	0	0	0	0	1	1	0	1	1
hsa-miR-19a	MIMAT0000073	NM_006439	MAB21L2	mab-21-like 2 (C. elegans)	0	0	0	0	0	0	1	1	0	1	1
hsa-miR-19a	MIMAT0000073	NM_006538	BCL2L11	BCL2-like 11 (apoptosis facilitator)	0	0	1	0	0	0	0	1	0	1	1
hsa-miR-19a	MIMAT0000073	NM_006565	CTCF	CCCTC-binding factor (zinc finger protein)	0	0	0	0	0	0	1	1	0	1	1
hsa-miR-19a	MIMAT0000073	NM_006581	FUT9	fucosyltransferase 9 (alpha (1,3) fucosyltransferase)	0	0	1	0	0	0	0	1	0	1	1
hsa-miR-19a	MIMAT0000073	NM_006614	CHL1	cell adhesion molecule with homology to L1CAM (close homolog of L1)	0	0	1	0	0	0	1	1	0	1	0
hsa-miR-19a	MIMAT0000073	NM_006698	BLCAP	bladder cancer associated protein	0	0	0	0	0	0	1	1	0	1	1
hsa-miR-19a	MIMAT0000073	NM_006712	FASTK	Fas-activated serine/threonine kinase	0	0	0	0	0	0	1	1	0	1	1
hsa-miR-19a	MIMAT0000073	NM_006922	SCN3A	sodium channel, voltage-gated, type III, alpha subunit	0	0	1	1	0	0	0	1	0	1	0
hsa-miR-19a	MIMAT0000073	NM_007013	WWP1	WW domain containing E3 ubiquitin protein ligase 1	0	0	0	0	0	0	1	1	0	1	1
hsa-miR-19a	MIMAT0000073	NM_005911	MAT2A	methionine adenosyltransferase II, alpha	0	0	0	0	0	0	1	1	0	1	1
hsa-miR-19a	MIMAT0000073	NM_005880	DNAJA2	DnaJ (Hsp40) homolog, subfamily A, member 2	0	0	0	0	0	0	1	1	0	1	1
hsa-miR-19a	MIMAT0000073	NM_005840	SPRY3	sprouty homolog 3 (Drosophila)	0	0	1	0	0	0	1	0	0	1	1
hsa-miR-19a	MIMAT0000073	NM_004735	LRRFIP1	leucine rich repeat (in FLII) interacting protein 1	0	0	1	1	0	0	0	1	0	1	0
hsa-miR-19a	MIMAT0000073	NM_004808	NMT2	N-myristoyltransferase 2	0	0	0	0	0	0	1	1	0	1	1
hsa-miR-19a	MIMAT0000073	NM_004956	ETV1	ets variant gene 1	0	0	1	0	0	0	0	1	0	1	1
hsa-miR-19a	MIMAT0000073	NM_004978	KCNC4	potassium voltage-gated channel, Shaw-related subfamily, member 4	0	0	1	0	0	0	1	1	0	1	0
hsa-miR-19a	MIMAT0000073	NM_005022	PFN1	profilin 1	0	0	1	0	0	0	1	1	0	0	1
hsa-miR-19a	MIMAT0000073	NM_005114	HS3ST1	heparan sulfate (glucosamine) 3-O-sulfotransferase 1	0	0	1	1	0	0	0	1	0	1	0
hsa-miR-19a	MIMAT0000073	NM_005121	MED13	mediator complex subunit 13	0	0	1	0	0	0	0	1	0	1	1
hsa-miR-19a	MIMAT0000073	NM_005235	ERBB4	v-erb-a erythroblastic leukemia viral oncogene homolog 4 (avian)	0	0	1	0	0	0	1	1	0	1	0
hsa-miR-19a	MIMAT0000073	NM_005316	GTF2H1	general transcription factor IIH, polypeptide 1, 62kDa	0	0	0	0	0	0	1	1	0	1	1
hsa-miR-19a	MIMAT0000073	NM_005336	HDLBP	high density lipoprotein binding protein (vigilin)	0	0	1	0	0	0	0	1	0	1	1
hsa-miR-19a	MIMAT0000073	NM_005338	HIP1	huntingtin interacting protein 1	0	0	1	1	0	0	0	1	0	1	0
hsa-miR-19a	MIMAT0000073	NM_005398	PPP1R3C	protein phosphatase 1, regulatory (inhibitor) subunit 3C	0	0	0	0	0	0	1	1	0	1	1
hsa-miR-19a	MIMAT0000073	NM_005436	CCDC6	coiled-coil domain containing 6	0	0	1	1	0	0	0	1	0	1	0
hsa-miR-19a	MIMAT0000073	NM_005542	INSIG1	insulin induced gene 1	0	0	1	1	0	0	0	1	0	1	0
hsa-miR-19a	MIMAT0000073	NM_005575	LNPEP	leucyl/cystinyl aminopeptidase	0	0	0	0	0	0	1	1	0	1	1
hsa-miR-19a	MIMAT0000073	NM_005627	SGK1	serum/glucocorticoid regulated kinase 1	0	0	0	1	0	0	1	1	0	0	1
hsa-miR-19a	MIMAT0000073	NM_005734	HIPK3	homeodomain interacting protein kinase 3	0	0	1	1	0	0	0	1	0	1	0
hsa-miR-19a	MIMAT0000073	NM_007072	HHLA2	HERV-H LTR-associating 2	0	0	1	1	0	0	0	1	0	1	0
hsa-miR-19a	MIMAT0000073	NM_007125	UTY	ubiquitously transcribed tetratricopeptide repeat gene, Y-linked	0	0	0	0	0	0	1	1	0	1	1
hsa-miR-19a	MIMAT0000073	NM_007159	SLMAP	sarcolemma associated protein	0	0	0	1	0	0	0	1	0	1	1
hsa-miR-19a	MIMAT0000073	NM_014048	MKL2	MKL/myocardin-like 2	0	0	0	1	0	0	1	1	0	1	0
hsa-miR-19a	MIMAT0000073	NM_014110	PPP1R8	protein phosphatase 1, regulatory (inhibitor) subunit 8	0	0	1	0	0	0	1	1	0	1	0
hsa-miR-19a	MIMAT0000073	NM_014392	D4S234E	DNA segment on chromosome 4 (unique) 234 expressed sequence	0	0	1	1	0	0	0	1	0	1	0
hsa-miR-19a	MIMAT0000073	NM_014447	ARFIP1	ADP-ribosylation factor interacting protein 1 (arfaptin 1)	0	0	1	1	0	0	0	1	0	1	0
hsa-miR-19a	MIMAT0000073	NM_014494	TNRC6A	trinucleotide repeat containing 6A	0	0	0	0	0	0	1	1	0	1	1
hsa-miR-19a	MIMAT0000073	NM_014574	STRN3	striatin, calmodulin binding protein 3	0	0	1	0	0	0	1	1	0	1	0
hsa-miR-19a	MIMAT0000073	NM_014632	MICAL2	microtubule associated monoxygenase, calponin and LIM domain containing 2	0	0	1	1	0	0	0	1	0	1	0
hsa-miR-19a	MIMAT0000073	NM_014636	RALGPS1	Ral GEF with PH domain and SH3 binding motif 1	0	0	1	0	0	0	0	1	0	1	1
hsa-miR-19a	MIMAT0000073	NM_014689	DOCK10	dedicator of cytokinesis 10	0	0	0	1	0	0	0	1	0	1	1
hsa-miR-19a	MIMAT0000073	NM_014701	KIAA0256	KIAA0256 gene product	0	0	1	1	0	0	0	1	0	1	0
hsa-miR-19a	MIMAT0000073	NM_014705	DOCK4	dedicator of cytokinesis 4	0	0	1	0	0	0	0	1	0	1	1
hsa-miR-19a	MIMAT0000073	NM_014736	KIAA0101	KIAA0101	0	0	1	1	0	0	0	1	0	1	0
hsa-miR-19a	MIMAT0000073	NM_014737	RASSF2	Ras association (RalGDS/AF-6) domain family member 2	0	0	1	1	0	0	0	1	0	1	0
hsa-miR-19a	MIMAT0000073	NM_014783	ARHGAP11A	Rho GTPase activating protein 11A	0	0	1	1	0	0	0	1	0	1	0
hsa-miR-19a	MIMAT0000073	NM_014812	CEP170	centrosomal protein 170kDa	0	0	1	0	0	0	1	1	0	1	0
hsa-miR-19a	MIMAT0000073	NM_014850	SRGAP3	SLIT-ROBO Rho GTPase activating protein 3	0	0	1	0	0	0	1	1	0	1	0
hsa-miR-19a	MIMAT0000073	NM_014912	CPEB3	cytoplasmic polyadenylation element binding protein 3	0	0	1	1	0	0	0	1	0	1	0
hsa-miR-19a	MIMAT0000073	NM_013943	CLIC4	chloride intracellular channel 4	0	0	1	1	0	0	0	1	0	1	0
hsa-miR-19a	MIMAT0000073	NM_013392	NRBP1	nuclear receptor binding protein 1	0	0	1	1	0	0	0	1	0	1	0
hsa-miR-19a	MIMAT0000073	NM_013330	NME7	non-metastatic cells 7, protein expressed in (nucleoside-diphosphate kinase)	0	0	0	0	0	0	1	1	0	1	1
hsa-miR-19a	MIMAT0000073	NM_007170	TESK2	testis-specific kinase 2	0	0	0	0	0	0	1	1	0	1	1
hsa-miR-19a	MIMAT0000073	NM_007187	WBP4	WW domain binding protein 4 (formin binding protein 21)	0	0	1	1	0	0	0	1	0	1	0
hsa-miR-19a	MIMAT0000073	NM_007220	CA5B	carbonic anhydrase VB, mitochondrial	0	0	1	1	0	0	0	1	0	1	0
hsa-miR-19a	MIMAT0000073	NM_007324	ZFYVE9	zinc finger, FYVE domain containing 9	0	0	1	0	0	0	1	1	0	1	0
hsa-miR-19a	MIMAT0000073	NM_009589	ARSD	arylsulfatase D	0	0	1	1	0	0	0	1	0	1	0
hsa-miR-19a	MIMAT0000073	NM_012096	APPL1	adaptor protein, phosphotyrosine interaction, PH domain and leucine zipper containing 1	0	0	1	0	0	0	0	1	0	1	1
hsa-miR-19a	MIMAT0000073	NM_012118	CCRN4L	CCR4 carbon catabolite repression 4-like (S. cerevisiae)	0	0	0	0	0	0	1	1	0	1	1
hsa-miR-19a	MIMAT0000073	NM_012234	RYBP	RING1 and YY1 binding protein	0	0	0	0	0	0	1	1	0	1	1
hsa-miR-19a	MIMAT0000073	NM_012308	FBXL11	F-box and leucine-rich repeat protein 11	0	0	0	0	0	0	1	1	0	1	1
hsa-miR-19a	MIMAT0000073	NM_012316	KPNA6	karyopherin alpha 6 (importin alpha 7)	0	0	1	1	0	0	0	1	0	1	0
hsa-miR-19a	MIMAT0000073	NM_012338	TSPAN12	tetraspanin 12	0	0	1	1	0	0	0	1	0	1	0
hsa-miR-19a	MIMAT0000073	NM_012428	NPTN	neuroplastin	0	0	1	0	0	0	1	1	0	0	1
hsa-miR-19a	MIMAT0000073	NM_012471	TRPC5	transient receptor potential cation channel, subfamily C, member 5	0	0	1	1	0	0	0	1	0	1	0
hsa-miR-19a	MIMAT0000073	NM_013236	ATXN10	ataxin 10	0	0	1	1	0	0	0	1	0	1	0
hsa-miR-19a	MIMAT0000073	NM_013240	N6AMT1	N-6 adenine-specific DNA methyltransferase 1 (putative)	0	0	1	1	0	0	0	1	0	1	0
hsa-miR-19a	MIMAT0000073	NM_013255	MKLN1	muskelin 1, intracellular mediator containing kelch motifs	0	0	1	1	0	0	0	1	0	1	0
hsa-miR-19a	MIMAT0000073	NM_013262	MYLIP	myosin regulatory light chain interacting protein	0	0	0	0	0	0	1	1	0	1	1
hsa-miR-19a	MIMAT0000073	NM_014923	FNDC3A	fibronectin type III domain containing 3A	0	0	1	0	0	0	1	1	0	1	0
