# Supplementary material for: Astrocyte-Derived Small Extracellular Vesicles Regulate Dendritic Complexity through miR-26a-5p Activity
Source: Preprints.org preprint supplement (doi:10.20944/preprints202002.0250.v1), 2020-02-17
Supplement: Supplementary file 9 [file mirecords 223 4.xls]

# "1" : interaction predicted; "0" : interaction not predicted.
miRNA ID	miRNA Acc	Refseq	Symbol	Description	diana	microinspector	miranda	mirtarget2	mitarget	nbmirtar	pictar	pita	rna22	rnahybrid	targetscan
hsa-miR-223	MIMAT0000280	NM_005595	NFIA	nuclear factor I/A	1	1	1	1	0	1	1	1	0	1	1
hsa-miR-223	MIMAT0000280	NM_001627	ALCAM	activated leukocyte cell adhesion molecule	0	0	1	1	0	0	1	1	0	1	1
hsa-miR-223	MIMAT0000280	NM_021190	PTBP2	polypyrimidine tract binding protein 2	0	0	1	1	0	0	1	1	0	1	1
hsa-miR-223	MIMAT0000280	NM_001993	F3	coagulation factor III (thromboplastin, tissue factor)	0	0	1	1	0	0	1	1	0	1	1
hsa-miR-223	MIMAT0000280	NM_024295	DERL1	Der1-like domain family, member 1	0	0	1	1	0	0	1	1	0	1	1
hsa-miR-223	MIMAT0000280	NM_025113	C13orf18	chromosome 13 open reading frame 18	0	0	1	1	0	0	1	1	0	1	1
hsa-miR-223	MIMAT0000280	NM_025126	RNF34	ring finger protein 34	0	0	1	1	0	0	1	1	0	1	1
hsa-miR-223	MIMAT0000280	NM_006766	MYST3	MYST histone acetyltransferase (monocytic leukemia) 3	0	0	1	1	0	0	1	1	0	1	1
hsa-miR-223	MIMAT0000280	NM_004457	ACSL3	acyl-CoA synthetase long-chain family member 3	0	0	1	1	0	0	1	1	0	1	1
hsa-miR-223	MIMAT0000280	NM_021097	SLC8A1	solute carrier family 8 (sodium/calcium exchanger), member 1	0	0	1	1	0	0	1	1	0	1	1
hsa-miR-223	MIMAT0000280	NM_012180	FBXO8	F-box protein 8	0	0	1	1	0	0	1	1	0	1	1
hsa-miR-223	MIMAT0000280	NM_014892	RBM16	RNA binding motif protein 16	0	0	1	1	0	0	1	1	0	1	1
hsa-miR-223	MIMAT0000280	NM_001616	ACVR2A	activin A receptor, type IIA	0	0	1	1	0	0	1	1	0	1	1
hsa-miR-223	MIMAT0000280	NM_015032	PDS5B	PDS5, regulator of cohesion maintenance, homolog B (S. cerevisiae)	0	0	1	1	0	0	1	1	0	1	1
hsa-miR-223	MIMAT0000280	NM_014363	SACS	spastic ataxia of Charlevoix-Saguenay (sacsin)	0	0	1	1	0	0	1	1	0	1	1
hsa-miR-223	MIMAT0000280	NM_016018	PHF20L1	PHD finger protein 20-like 1	0	0	1	1	0	0	1	1	0	1	1
hsa-miR-223	MIMAT0000280	NM_016441	CRIM1	cysteine rich transmembrane BMP regulator 1 (chordin-like)	0	0	1	1	0	0	1	1	0	1	1
hsa-miR-223	MIMAT0000280	NM_001755	CBFB	core-binding factor, beta subunit	0	0	1	1	0	0	1	1	0	1	1
hsa-miR-223	MIMAT0000280	NM_013233	STK39	serine threonine kinase 39 (STE20/SPS1 homolog, yeast)	0	0	1	1	0	0	1	1	0	1	1
hsa-miR-223	MIMAT0000280	NM_018315	FBXW7	F-box and WD repeat domain containing 7	0	0	1	1	0	0	1	1	0	1	1
hsa-miR-223	MIMAT0000280	NM_032295	SLC37A3	solute carrier family 37 (glycerol-3-phosphate transporter), member 3	0	0	1	1	0	0	1	1	0	1	1
hsa-miR-223	MIMAT0000280	NM_033224	PURB	purine-rich element binding protein B	0	0	1	1	0	0	1	1	0	1	1
hsa-miR-223	MIMAT0000280	NM_003161	RPS6KB1	ribosomal protein S6 kinase, 70kDa, polypeptide 1	0	0	1	1	0	0	1	1	0	1	1
hsa-miR-223	MIMAT0000280	NM_004040	RHOB	ras homolog gene family, member B	0	0	1	1	0	0	1	1	0	1	1
hsa-miR-223	MIMAT0000280	NM_002890	RASA1	RAS p21 protein activator (GTPase activating protein) 1	0	0	1	1	0	0	1	1	0	1	1
hsa-miR-223	MIMAT0000280	NM_002729	HHEX	hematopoietically expressed homeobox	0	0	1	1	0	0	1	1	0	1	1
hsa-miR-223	MIMAT0000280	NM_004428	EFNA1	ephrin-A1	0	0	1	1	0	0	1	1	0	1	1
hsa-miR-223	MIMAT0000280	NM_002595	PCTK2	PCTAIRE protein kinase 2	0	0	1	1	0	0	1	1	0	1	1
hsa-miR-223	MIMAT0000280	NM_001198	PRDM1	PR domain containing 1, with ZNF domain	0	0	1	1	0	0	1	1	0	1	1
hsa-miR-223	MIMAT0000280	NM_145808	MTPN	myotrophin	0	0	1	1	0	0	1	1	0	1	1
hsa-miR-223	MIMAT0000280	NM_004571	PKNOX1	PBX/knotted 1 homeobox 1	0	0	1	1	0	0	1	1	0	1	1
hsa-miR-223	MIMAT0000280	NM_004615	TSPAN7	tetraspanin 7	0	0	1	1	0	0	1	1	0	1	1
hsa-miR-223	MIMAT0000280	NM_005574	LMO2	LIM domain only 2 (rhombotin-like 1)	0	0	1	1	0	0	1	1	0	1	1
hsa-miR-223	MIMAT0000280	NM_005540	INPP5B	inositol polyphosphate-5-phosphatase, 75kDa	0	0	1	1	0	0	1	1	0	1	1
hsa-miR-223	MIMAT0000280	NM_007207	DUSP10	dual specificity phosphatase 10	0	0	0	1	0	0	1	1	0	1	1
hsa-miR-223	MIMAT0000280	NM_003111	SP3	Sp3 transcription factor	0	0	1	1	0	0	1	1	0	1	0
hsa-miR-223	MIMAT0000280	NM_005596	NFIB	nuclear factor I/B	0	0	1	0	0	0	1	1	0	1	1
hsa-miR-223	MIMAT0000280	NM_003299	HSP90B1	heat shock protein 90kDa beta (Grp94), member 1	0	0	0	1	0	0	1	1	0	1	1
hsa-miR-223	MIMAT0000280	NM_014112	TRPS1	trichorhinophalangeal syndrome I	0	0	1	0	0	0	1	1	0	1	1
hsa-miR-223	MIMAT0000280	NM_005349	RBPJ	recombination signal binding protein for immunoglobulin kappa J region	0	0	1	0	0	0	1	1	0	1	1
hsa-miR-223	MIMAT0000280	NM_004393	DAG1	dystroglycan 1 (dystrophin-associated glycoprotein 1)	0	0	1	0	0	0	1	1	0	1	1
hsa-miR-223	MIMAT0000280	NM_006885	ZFHX3	zinc finger homeobox 3	0	0	1	1	0	0	0	1	0	1	1
hsa-miR-223	MIMAT0000280	NM_006920	SCN1A	sodium channel, voltage-gated, type I, alpha subunit	0	0	1	1	0	0	0	1	0	1	1
hsa-miR-223	MIMAT0000280	NM_006203	PDE4D	phosphodiesterase 4D, cAMP-specific (phosphodiesterase E3 dunce homolog, Drosophila)	0	0	1	0	0	0	1	1	0	1	1
hsa-miR-223	MIMAT0000280	NM_014686	KIAA0355	KIAA0355	0	0	1	0	0	0	1	1	0	1	1
hsa-miR-223	MIMAT0000280	NM_015129	SEPT6	septin 6	0	0	0	1	0	0	1	1	0	1	1
hsa-miR-223	MIMAT0000280	NM_144726	RNF145	ring finger protein 145	0	0	1	0	0	0	1	1	0	1	1
hsa-miR-223	MIMAT0000280	NM_144728	DUSP10	dual specificity phosphatase 10	0	0	1	1	0	0	1	1	0	1	0
hsa-miR-223	MIMAT0000280	NM_144729	DUSP10	dual specificity phosphatase 10	0	0	1	1	0	0	1	1	0	1	0
hsa-miR-223	MIMAT0000280	NM_152594	SPRED1	sprouty-related, EVH1 domain containing 1	0	0	1	0	0	0	1	1	0	1	1
hsa-miR-223	MIMAT0000280	NM_152621	SGMS2	sphingomyelin synthase 2	0	0	1	0	0	0	1	1	0	1	1
hsa-miR-223	MIMAT0000280	NM_152663	RALGPS2	Ral GEF with PH domain and SH3 binding motif 2	0	0	1	1	0	0	1	1	0	1	0
hsa-miR-223	MIMAT0000280	NM_153261	TMEM188	transmembrane protein 188	0	0	1	0	0	0	1	1	0	1	1
hsa-miR-223	MIMAT0000280	NM_175767	IL6ST	interleukin 6 signal transducer (gp130, oncostatin M receptor)	0	0	1	1	0	0	1	1	0	1	0
hsa-miR-223	MIMAT0000280	NM_182907	PRDM1	PR domain containing 1, with ZNF domain	0	0	1	1	0	0	1	1	0	1	0
hsa-miR-223	MIMAT0000280	NM_198889	ANKRD17	ankyrin repeat domain 17	0	0	1	1	0	0	1	1	0	1	0
hsa-miR-223	MIMAT0000280	NM_199324	OTUD4	OTU domain containing 4	0	0	1	0	0	0	1	1	0	1	1
hsa-miR-223	MIMAT0000280	NM_203372	ACSL3	acyl-CoA synthetase long-chain family member 3	0	0	1	1	0	0	1	1	0	1	0
hsa-miR-223	MIMAT0000280	NM_139168	SFRS12	splicing factor, arginine/serine-rich 12	0	0	1	1	0	0	1	1	0	1	0
hsa-miR-223	MIMAT0000280	NM_052832	SLC26A7	solute carrier family 26, member 7	0	0	1	0	0	0	1	1	0	1	1
hsa-miR-223	MIMAT0000280	NM_033632	FBXW7	F-box and WD repeat domain containing 7	0	0	1	1	0	0	1	1	0	1	0
hsa-miR-223	MIMAT0000280	NM_016131	RAB10	RAB10, member RAS oncogene family	0	0	1	0	0	0	1	1	0	1	1
hsa-miR-223	MIMAT0000280	NM_017633	FAM46A	family with sequence similarity 46, member A	0	0	1	1	0	0	0	1	0	1	1
hsa-miR-223	MIMAT0000280	NM_005909	MAP1B	microtubule-associated protein 1B	0	0	1	0	0	0	1	1	0	1	1
hsa-miR-223	MIMAT0000280	NM_020795	NLGN2	neuroligin 2	0	0	1	0	0	0	1	1	0	1	1
hsa-miR-223	MIMAT0000280	NM_022374	ARL6IP2	ADP-ribosylation factor-like 6 interacting protein 2	0	0	1	0	0	0	1	1	0	1	1
hsa-miR-223	MIMAT0000280	NM_022650	RASA1	RAS p21 protein activator (GTPase activating protein) 1	0	0	1	1	0	0	1	1	0	1	0
hsa-miR-223	MIMAT0000280	NM_022659	EBF2	early B-cell factor 2	0	0	1	0	0	0	1	1	0	1	1
hsa-miR-223	MIMAT0000280	NM_022845	CBFB	core-binding factor, beta subunit	0	0	1	1	0	0	1	1	0	1	0
hsa-miR-223	MIMAT0000280	NM_030938	TMEM49	transmembrane protein 49	0	0	1	0	0	0	1	1	0	1	1
hsa-miR-223	MIMAT0000280	NM_031937	TBC1D10A	TBC1 domain family, member 10A	0	0	1	0	0	0	1	1	0	1	1
hsa-miR-223	MIMAT0000280	NM_032217	ANKRD17	ankyrin repeat domain 17	0	0	0	1	0	0	1	1	0	1	1
hsa-miR-223	MIMAT0000280	NM_033429	CALML4	calmodulin-like 4	0	0	1	1	0	0	1	1	0	1	0
hsa-miR-223	MIMAT0000280	NM_206854	QKI	quaking homolog, KH domain RNA binding (mouse)	0	0	1	0	0	0	1	1	0	1	1
hsa-miR-223	MIMAT0000280	NM_001682	ATP2B1	ATPase, Ca++ transporting, plasma membrane 1	0	0	1	0	0	0	1	1	0	1	1
hsa-miR-223	MIMAT0000280	NM_002126	HLF	hepatic leukemia factor	0	0	1	0	0	0	1	1	0	1	1
hsa-miR-223	MIMAT0000280	NM_003156	STIM1	stromal interaction molecule 1	0	0	0	1	0	0	1	1	0	1	1
hsa-miR-223	MIMAT0000280	NM_000875	IGF1R	insulin-like growth factor 1 receptor	0	0	1	1	0	0	0	1	0	1	1
hsa-miR-223	MIMAT0000280	NM_001077199	SFRS12	splicing factor, arginine/serine-rich 12	0	0	1	1	0	0	0	1	0	1	1
hsa-miR-223	MIMAT0000280	NM_002397	MEF2C	myocyte enhancer factor 2C	0	0	1	0	0	0	1	1	0	1	1
hsa-miR-223	MIMAT0000280	NM_001080467	MYO5B	myosin VB	0	0	1	1	0	0	0	1	0	1	1
hsa-miR-223	MIMAT0000280	NM_002267	KPNA3	karyopherin alpha 3 (importin alpha 4)	0	0	1	1	0	0	0	1	0	1	1
hsa-miR-223	MIMAT0000280	NM_001031733	CALML4	calmodulin-like 4	0	0	1	1	0	0	0	1	0	1	1
hsa-miR-223	MIMAT0000280	NM_001024680	FBXO48	F-box protein 48	0	0	1	1	0	0	0	1	0	1	0
hsa-miR-223	MIMAT0000280	NM_033221	TRIM14	tripartite motif-containing 14	0	0	1	1	0	0	0	1	0	1	0
hsa-miR-223	MIMAT0000280	NM_031371	ARID4B	AT rich interactive domain 4B (RBP1-like)	0	0	1	0	0	0	1	1	0	1	0
hsa-miR-223	MIMAT0000280	NM_033133	CNP	2",3"-cyclic nucleotide 3" phosphodiesterase	0	0	1	1	0	0	0	1	0	1	0
hsa-miR-223	MIMAT0000280	NM_033014	OGN	osteoglycin	0	0	1	1	0	0	0	1	0	1	0
hsa-miR-223	MIMAT0000280	NM_001029858	SLC35F1	solute carrier family 35, member F1	0	0	1	0	0	0	0	1	0	1	1
hsa-miR-223	MIMAT0000280	NM_032813	TMTC4	transmembrane and tetratricopeptide repeat containing 4	0	0	1	1	0	0	0	1	0	1	0
hsa-miR-223	MIMAT0000280	NM_032361	THOC3	THO complex 3	0	0	1	1	0	0	0	1	0	1	0
hsa-miR-223	MIMAT0000280	NM_032859	ABHD13	abhydrolase domain containing 13	0	0	0	0	0	0	1	1	0	1	1
hsa-miR-223	MIMAT0000280	NM_144618	RP11-68I18.1	hypothetical protein MGC29891	0	0	1	1	0	0	0	1	0	1	0
hsa-miR-223	MIMAT0000280	NM_144571	CNOT6L	CCR4-NOT transcription complex, subunit 6-like	0	0	1	1	0	0	0	1	0	1	0
hsa-miR-223	MIMAT0000280	NM_001008737	LOC401052	hypothetical LOC401052	0	0	1	1	0	0	0	1	0	1	0
hsa-miR-223	MIMAT0000280	NM_138716	MSR1	macrophage scavenger receptor 1	0	0	1	1	0	0	0	1	0	1	0
hsa-miR-223	MIMAT0000280	NM_138715	MSR1	macrophage scavenger receptor 1	0	0	1	1	0	0	0	1	0	1	0
hsa-miR-223	MIMAT0000280	NM_138485	GTPBP8	GTP-binding protein 8 (putative)	0	0	1	1	0	0	0	1	0	1	0
hsa-miR-223	MIMAT0000280	NM_134442	CREB1	cAMP responsive element binding protein 1	0	0	1	1	0	0	0	1	0	1	0
hsa-miR-223	MIMAT0000280	NM_080625	C20orf160	chromosome 20 open reading frame 160	0	0	1	1	0	0	0	1	0	1	0
hsa-miR-223	MIMAT0000280	NM_054027	ANKH	ankylosis, progressive homolog (mouse)	0	0	1	1	0	0	0	1	0	1	0
hsa-miR-223	MIMAT0000280	NM_001009566	CLSTN1	calsyntenin 1	0	0	1	1	0	0	0	1	0	1	0
hsa-miR-223	MIMAT0000280	NM_001017371	SP3	Sp3 transcription factor	0	0	0	1	0	0	0	1	0	1	1
hsa-miR-223	MIMAT0000280	NM_152903	KBTBD6	kelch repeat and BTB (POZ) domain containing 6	0	0	1	1	0	0	0	1	0	1	0
hsa-miR-223	MIMAT0000280	NM_001018089	NARG2	NMDA receptor regulated 2	0	0	1	1	0	0	0	1	0	1	0
hsa-miR-223	MIMAT0000280	NM_001024596	ZNF772	zinc finger protein 772	0	0	1	1	0	0	0	1	0	1	0
hsa-miR-223	MIMAT0000280	NM_001034155	C9orf102	chromosome 9 open reading frame 102	0	0	1	1	0	0	0	1	0	1	0
hsa-miR-223	MIMAT0000280	NM_025160	WDR26	WD repeat domain 26	0	0	1	0	0	0	0	1	0	1	1
hsa-miR-223	MIMAT0000280	NM_021927	GUF1	GUF1 GTPase homolog (S. cerevisiae)	0	0	1	1	0	0	0	1	0	1	0
hsa-miR-223	MIMAT0000280	NM_001079821	NLRP3	NLR family, pyrin domain containing 3	0	0	0	1	0	0	0	1	0	1	1
hsa-miR-223	MIMAT0000280	NM_001080415	SR140	U2-associated SR140 protein	0	0	1	1	0	0	0	1	0	1	0
hsa-miR-223	MIMAT0000280	NM_021033	RAP2A	RAP2A, member of RAS oncogene family	0	0	0	0	0	0	1	1	0	1	1
hsa-miR-223	MIMAT0000280	NM_020899	ZBTB4	zinc finger and BTB domain containing 4	0	0	1	1	0	0	0	1	0	1	0
hsa-miR-223	MIMAT0000280	NM_020854	KIAA1468	KIAA1468	0	0	1	0	0	0	0	1	0	1	1
hsa-miR-223	MIMAT0000280	NM_001080416	MYBL1	v-myb myeloblastosis viral oncogene homolog (avian)-like 1	0	0	1	0	0	0	0	1	0	1	1
hsa-miR-223	MIMAT0000280	NM_020779	WDR35	WD repeat domain 35	0	0	1	1	0	0	0	1	0	1	0
hsa-miR-223	MIMAT0000280	NM_020715	PLEKHH1	pleckstrin homology domain containing, family H (with MyTH4 domain) member 1	0	0	1	0	0	0	0	1	0	1	1
hsa-miR-223	MIMAT0000280	NM_020651	PELI1	pellino homolog 1 (Drosophila)	0	0	1	1	0	0	0	1	0	1	0
hsa-miR-223	MIMAT0000280	NM_020193	C11orf30	chromosome 11 open reading frame 30	0	0	1	0	0	0	0	1	0	1	1
hsa-miR-223	MIMAT0000280	NM_020162	DHX33	DEAH (Asp-Glu-Ala-His) box polypeptide 33	0	0	1	1	0	0	0	1	0	1	0
hsa-miR-223	MIMAT0000280	NM_021964	ZNF148	zinc finger protein 148	0	0	1	0	0	0	0	1	0	1	1
hsa-miR-223	MIMAT0000280	NM_022048	CSNK1G1	casein kinase 1, gamma 1	0	0	1	0	0	0	0	1	0	1	1
hsa-miR-223	MIMAT0000280	NM_025146	NAT13	N-acetyltransferase 13	0	0	0	0	0	0	1	1	0	1	1
hsa-miR-223	MIMAT0000280	NM_001034852	SMOC1	SPARC related modular calcium binding 1	0	0	1	0	0	0	0	1	0	1	1
hsa-miR-223	MIMAT0000280	NM_001034955	SORBS1	sorbin and SH3 domain containing 1	0	0	1	1	0	0	0	1	0	1	0
hsa-miR-223	MIMAT0000280	NM_024991	SORBS1	sorbin and SH3 domain containing 1	0	0	1	1	0	0	0	1	0	1	0
hsa-miR-223	MIMAT0000280	NM_024611	NARG2	NMDA receptor regulated 2	0	0	1	1	0	0	0	1	0	1	0
hsa-miR-223	MIMAT0000280	NM_001034957	SORBS1	sorbin and SH3 domain containing 1	0	0	1	1	0	0	0	1	0	1	0
hsa-miR-223	MIMAT0000280	NM_001039618	CREBZF	CREB/ATF bZIP transcription factor	0	0	1	0	0	0	0	1	0	1	1
hsa-miR-223	MIMAT0000280	NM_001040653	ZXDC	ZXD family zinc finger C	0	0	1	0	0	0	0	1	0	1	1
hsa-miR-223	MIMAT0000280	NM_001079669	TMTC4	transmembrane and tetratricopeptide repeat containing 4	0	0	1	1	0	0	0	1	0	1	0
hsa-miR-223	MIMAT0000280	NM_022340	ZFYVE20	zinc finger, FYVE domain containing 20	0	0	1	1	0	0	0	1	0	1	0
hsa-miR-223	MIMAT0000280	NM_022168	IFIH1	interferon induced with helicase C domain 1	0	0	1	1	0	0	0	1	0	1	0
hsa-miR-223	MIMAT0000280	NM_022154	SLC39A8	solute carrier family 39 (zinc transporter), member 8	0	0	0	0	0	0	1	1	0	1	1
hsa-miR-223	MIMAT0000280	NM_019058	DDIT4	DNA-damage-inducible transcript 4	0	0	0	0	0	0	1	1	0	1	1
hsa-miR-223	MIMAT0000280	NM_001008491	SEPT2	septin 2	0	0	1	1	0	0	0	1	0	1	0
hsa-miR-223	MIMAT0000280	NM_207310	CCDC74B	coiled-coil domain containing 74B	0	0	1	1	0	0	0	1	0	1	0
hsa-miR-223	MIMAT0000280	NM_194282	LIN54	lin-54 homolog (C. elegans)	0	0	1	1	0	0	0	1	0	1	0
hsa-miR-223	MIMAT0000280	NM_194271	RNF34	ring finger protein 34	0	0	0	1	0	0	1	1	0	1	0
hsa-miR-223	MIMAT0000280	NM_183395	NLRP3	NLR family, pyrin domain containing 3	0	0	0	1	0	0	1	1	0	1	0
hsa-miR-223	MIMAT0000280	NM_000430	PAFAH1B1	platelet-activating factor acetylhydrolase, isoform Ib, alpha subunit 45kDa	0	0	0	0	0	0	1	1	0	1	1
hsa-miR-223	MIMAT0000280	NM_182742	TXNRD1	thioredoxin reductase 1	0	0	1	0	0	0	1	1	0	1	0
hsa-miR-223	MIMAT0000280	NM_182729	TXNRD1	thioredoxin reductase 1	0	0	1	0	0	0	1	1	0	1	0
hsa-miR-223	MIMAT0000280	NM_182728	SLC7A8	solute carrier family 7 (cationic amino acid transporter, y+ system), member 8	0	0	1	1	0	0	0	1	0	1	0
hsa-miR-223	MIMAT0000280	NM_182685	EFNA1	ephrin-A1	0	0	0	1	0	0	1	1	0	1	0
hsa-miR-223	MIMAT0000280	NM_181762	UBE2A	ubiquitin-conjugating enzyme E2A (RAD6 homolog)	0	0	1	0	0	0	1	1	0	1	0
hsa-miR-223	MIMAT0000280	NM_181670	ANKS1B	ankyrin repeat and sterile alpha motif domain containing 1B	0	0	1	1	0	0	0	1	0	1	0
hsa-miR-223	MIMAT0000280	NM_181552	CUX1	cut-like homeobox 1	0	0	1	0	0	0	0	1	0	1	1
hsa-miR-223	MIMAT0000280	NM_178584	SEPT10	septin 10	0	0	1	1	0	0	0	1	0	1	0
hsa-miR-223	MIMAT0000280	NM_000350	ABCA4	ATP-binding cassette, sub-family A (ABC1), member 4	0	0	1	1	0	0	0	1	0	1	0
hsa-miR-223	MIMAT0000280	NM_199051	FAM5C	family with sequence similarity 5, member C	0	0	0	0	0	0	1	1	0	1	1
hsa-miR-223	MIMAT0000280	NM_207303	ATRNL1	attractin-like 1	0	0	1	1	0	0	0	1	0	1	0
hsa-miR-223	MIMAT0000280	NM_207297	MBNL1	muscleblind-like (Drosophila)	0	0	0	0	0	0	1	1	0	1	1
hsa-miR-223	MIMAT0000280	NM_207113	SLC37A3	solute carrier family 37 (glycerol-3-phosphate transporter), member 3	0	0	0	1	0	0	1	1	0	1	0
hsa-miR-223	MIMAT0000280	NM_206855	QKI	quaking homolog, KH domain RNA binding (mouse)	0	0	1	0	0	0	1	1	0	1	0
hsa-miR-223	MIMAT0000280	NM_000133	F9	coagulation factor IX (plasma thromboplastic component, Christmas disease, hemophilia B)	0	0	1	1	0	0	0	1	0	1	0
hsa-miR-223	MIMAT0000280	NM_206853	QKI	quaking homolog, KH domain RNA binding (mouse)	0	0	1	0	0	0	1	1	0	1	0
hsa-miR-223	MIMAT0000280	NM_000141	FGFR2	fibroblast growth factor receptor 2 (bacteria-expressed kinase, keratinocyte growth factor receptor, craniofacial dysostosis 1, Crouzon syndrome, Pfeiffer syndrome, Jackson-Weiss syndrome)	0	0	0	0	0	0	1	1	0	1	1
hsa-miR-223	MIMAT0000280	NM_203283	RBPJ	recombination signal binding protein for immunoglobulin kappa J region	0	0	1	0	0	0	1	1	0	1	0
hsa-miR-223	MIMAT0000280	NM_201559	FOXO3	forkhead box O3	0	0	1	0	0	0	1	1	0	1	0
hsa-miR-223	MIMAT0000280	NM_199487	UQCC	ubiquinol-cytochrome c reductase complex chaperone, CBP3 homolog (yeast)	0	0	1	0	0	0	1	1	0	1	0
hsa-miR-223	MIMAT0000280	NM_199328	CLDN8	claudin 8	0	0	1	1	0	0	0	1	0	1	0
hsa-miR-223	MIMAT0000280	NM_000345	SNCA	synuclein, alpha (non A4 component of amyloid precursor)	0	0	1	1	0	0	0	1	0	1	0
hsa-miR-223	MIMAT0000280	NM_178314	RILPL1	Rab interacting lysosomal protein-like 1	0	0	1	1	0	0	0	1	0	1	0
hsa-miR-223	MIMAT0000280	NM_177532	RASSF6	Ras association (RalGDS/AF-6) domain family member 6	0	0	1	1	0	0	0	1	0	1	0
hsa-miR-223	MIMAT0000280	NM_152678	FAM116A	family with sequence similarity 116, member A	0	0	0	0	0	0	1	1	0	1	1
hsa-miR-223	MIMAT0000280	NM_000909	NPY1R	neuropeptide Y receptor Y1	0	0	1	1	0	0	0	1	0	1	0
hsa-miR-223	MIMAT0000280	NM_001001323	ATP2B1	ATPase, Ca++ transporting, plasma membrane 1	0	0	1	0	0	0	1	1	0	1	0
hsa-miR-223	MIMAT0000280	NM_152450	FAM81A	family with sequence similarity 81, member A	0	0	1	1	0	0	0	1	0	1	0
hsa-miR-223	MIMAT0000280	NM_148923	CYB5A	cytochrome b5 type A (microsomal)	0	0	0	0	0	0	1	1	0	1	1
hsa-miR-223	MIMAT0000280	NM_001001928	PPARA	peroxisome proliferator-activated receptor alpha	0	0	1	1	0	0	0	1	0	1	0
hsa-miR-223	MIMAT0000280	NM_145206	VTI1A	vesicle transport through interaction with t-SNAREs homolog 1A (yeast)	0	0	1	0	0	0	0	1	0	1	1
hsa-miR-223	MIMAT0000280	NM_145102	ZKSCAN5	zinc finger with KRAB and SCAN domains 5	0	0	1	1	0	0	0	1	0	1	0
hsa-miR-223	MIMAT0000280	NM_144973	MGC24039	hypothetical protein MGC24039	0	0	1	1	0	0	0	1	0	1	0
hsa-miR-223	MIMAT0000280	NM_144968	RIBC1	RIB43A domain with coiled-coils 1	0	0	1	1	0	0	0	1	0	1	0
hsa-miR-223	MIMAT0000280	NM_144967	RP13-102H20.1	hypothetical protein FLJ30058	0	0	0	0	0	0	1	1	0	1	1
hsa-miR-223	MIMAT0000280	NM_001005463	EBF3	early B-cell factor 3	0	0	0	0	0	0	1	1	0	1	1
hsa-miR-223	MIMAT0000280	NM_152682	RWDD4A	RWD domain containing 4A	0	0	1	1	0	0	0	1	0	1	0
hsa-miR-223	MIMAT0000280	NM_153038	CCDC140	coiled-coil domain containing 140	0	0	1	0	0	0	0	1	0	1	1
hsa-miR-223	MIMAT0000280	NM_177454	FAM171B	family with sequence similarity 171, member B	0	0	1	1	0	0	0	1	0	1	0
hsa-miR-223	MIMAT0000280	NM_176787	PIGN	phosphatidylinositol glycan anchor biosynthesis, class N	0	0	1	1	0	0	0	1	0	1	0
hsa-miR-223	MIMAT0000280	NM_000530	MPZ	myelin protein zero (Charcot-Marie-Tooth neuropathy 1B)	0	0	0	0	0	0	1	1	0	1	1
hsa-miR-223	MIMAT0000280	NM_175060	CLEC14A	C-type lectin domain family 14, member A	0	0	1	1	0	0	0	1	0	1	0
hsa-miR-223	MIMAT0000280	NM_175056	ZPLD1	zona pellucida-like domain containing 1	0	0	1	1	0	0	0	1	0	1	0
hsa-miR-223	MIMAT0000280	NM_174916	UBR1	ubiquitin protein ligase E3 component n-recognin 1	0	0	1	1	0	0	0	1	0	1	0
hsa-miR-223	MIMAT0000280	NM_173811	C11orf77	chromosome 11 open reading frame 77	0	0	1	1	0	0	0	1	0	1	0
hsa-miR-223	MIMAT0000280	NM_173636	WDR62	WD repeat domain 62	0	0	0	1	0	0	1	1	0	1	0
hsa-miR-223	MIMAT0000280	NM_173618	CCDC95	coiled-coil domain containing 95	0	0	0	0	0	0	1	1	0	1	1
hsa-miR-223	MIMAT0000280	NM_173529	C18orf54	chromosome 18 open reading frame 54	0	0	1	1	0	0	0	1	0	1	0
hsa-miR-223	MIMAT0000280	NM_000843	GRM6	glutamate receptor, metabotropic 6	0	0	1	1	0	0	0	1	0	1	0
hsa-miR-223	MIMAT0000280	NM_153207	AEBP2	AE binding protein 2	0	0	0	0	0	0	1	1	0	1	1
hsa-miR-223	MIMAT0000280	NM_001006610	SIAH1	seven in absentia homolog 1 (Drosophila)	0	0	1	1	0	0	0	1	0	1	0
hsa-miR-223	MIMAT0000280	NM_018718	TSGA14	testis specific, 14	0	0	0	0	0	0	1	1	0	1	1
hsa-miR-223	MIMAT0000280	NM_006922	SCN3A	sodium channel, voltage-gated, type III, alpha subunit	0	0	0	1	0	0	1	1	0	1	0
hsa-miR-223	MIMAT0000280	NM_005964	MYH10	myosin, heavy chain 10, non-muscle	0	0	0	1	0	0	1	1	0	1	0
hsa-miR-223	MIMAT0000280	NM_005941	MMP16	matrix metallopeptidase 16 (membrane-inserted)	0	0	1	0	0	0	0	1	0	1	1
hsa-miR-223	MIMAT0000280	NM_002130	HMGCS1	3-hydroxy-3-methylglutaryl-Coenzyme A synthase 1 (soluble)	0	0	0	0	0	0	1	1	0	1	1
hsa-miR-223	MIMAT0000280	NM_005898	CAPRIN1	cell cycle associated protein 1	0	0	1	1	0	0	0	1	0	1	0
hsa-miR-223	MIMAT0000280	NM_005859	PURA	purine-rich element binding protein A	0	0	1	0	0	0	0	1	0	1	1
hsa-miR-223	MIMAT0000280	NM_002184	IL6ST	interleukin 6 signal transducer (gp130, oncostatin M receptor)	0	0	0	1	0	0	1	1	0	1	0
hsa-miR-223	MIMAT0000280	NM_002193	INHBB	inhibin, beta B	0	0	1	1	0	0	0	1	0	1	0
hsa-miR-223	MIMAT0000280	NM_002211	ITGB1	integrin, beta 1 (fibronectin receptor, beta polypeptide, antigen CD29 includes MDF2, MSK12)	0	0	0	0	0	0	1	1	0	1	1
hsa-miR-223	MIMAT0000280	NM_005563	STMN1	stathmin 1/oncoprotein 18	0	0	1	0	0	0	1	0	0	1	1
hsa-miR-223	MIMAT0000280	NM_002264	KPNA1	karyopherin alpha 1 (importin alpha 5)	0	0	1	1	0	0	0	1	0	1	0
hsa-miR-223	MIMAT0000280	NM_005461	MAFB	v-maf musculoaponeurotic fibrosarcoma oncogene homolog B (avian)	0	0	0	0	0	0	1	1	0	1	1
hsa-miR-223	MIMAT0000280	NM_005245	FAT	FAT tumor suppressor homolog 1 (Drosophila)	0	0	0	0	0	0	1	1	0	1	1
hsa-miR-223	MIMAT0000280	NM_006224	PITPNA	phosphatidylinositol transfer protein, alpha	0	0	1	1	0	0	0	1	0	1	0
hsa-miR-223	MIMAT0000280	NM_006256	PKN2	protein kinase N2	0	0	1	0	0	0	0	1	0	1	1
hsa-miR-223	MIMAT0000280	NM_002006	FGF2	fibroblast growth factor 2 (basic)	0	0	1	1	0	0	0	1	0	1	0
hsa-miR-223	MIMAT0000280	NM_002015	FOXO1	forkhead box O1	0	0	1	1	0	0	0	1	0	1	0
hsa-miR-223	MIMAT0000280	NM_006807	CBX1	chromobox homolog 1 (HP1 beta homolog Drosophila )	0	0	0	0	0	0	1	1	0	1	1
hsa-miR-223	MIMAT0000280	NM_002077	GOLGA1	golgi autoantigen, golgin subfamily a, 1	0	0	0	0	0	0	1	1	0	1	1
hsa-miR-223	MIMAT0000280	NM_006706	TCERG1	transcription elongation regulator 1	0	0	1	0	0	0	1	1	0	1	0
hsa-miR-223	MIMAT0000280	NM_006609	MAP3K2	mitogen-activated protein kinase kinase kinase 2	0	0	0	0	0	0	1	1	0	1	1
hsa-miR-223	MIMAT0000280	NM_006434	SORBS1	sorbin and SH3 domain containing 1	0	0	1	1	0	0	0	1	0	1	0
hsa-miR-223	MIMAT0000280	NM_006393	NEBL	nebulette	0	0	1	1	0	0	0	1	0	1	0
hsa-miR-223	MIMAT0000280	NM_006352	ZNF238	zinc finger protein 238	0	0	0	0	0	0	1	1	0	1	1
hsa-miR-223	MIMAT0000280	NM_006334	OLFM1	olfactomedin 1	0	0	1	0	0	0	1	1	0	1	0
hsa-miR-223	MIMAT0000280	NM_006306	SMC1A	structural maintenance of chromosomes 1A	0	0	1	1	0	0	0	1	0	1	0
hsa-miR-223	MIMAT0000280	NM_006268	DPF2	D4, zinc and double PHD fingers family 2	0	0	0	0	0	0	1	1	0	1	1
hsa-miR-223	MIMAT0000280	NM_005233	EPHA3	EPH receptor A3	0	0	1	1	0	0	0	1	0	1	0
hsa-miR-223	MIMAT0000280	NM_005116	SLC23A2	solute carrier family 23 (nucleobase transporters), member 2	0	0	1	0	0	0	0	1	0	1	1
hsa-miR-223	MIMAT0000280	NM_004363	CEACAM5	carcinoembryonic antigen-related cell adhesion molecule 5	0	0	1	1	0	0	0	1	0	1	0
hsa-miR-223	MIMAT0000280	NM_004282	BAG2	BCL2-associated athanogene 2	0	0	1	1	0	0	0	1	0	1	0
hsa-miR-223	MIMAT0000280	NM_004236	COPS2	COP9 constitutive photomorphogenic homolog subunit 2 (Arabidopsis)	0	0	0	0	0	0	1	1	0	1	1
hsa-miR-223	MIMAT0000280	NM_004061	CDH12	cadherin 12, type 2 (N-cadherin 2)	0	0	0	0	0	0	1	1	0	1	1
hsa-miR-223	MIMAT0000280	NM_002902	RCN2	reticulocalbin 2, EF-hand calcium binding domain	0	0	0	0	0	0	1	1	0	1	1
hsa-miR-223	MIMAT0000280	NM_003628	PKP4	plakophilin 4	0	0	1	1	0	0	0	1	0	1	0
hsa-miR-223	MIMAT0000280	NM_003410	ZFX	zinc finger protein, X-linked	0	0	1	0	0	0	0	1	0	1	1
hsa-miR-223	MIMAT0000280	NM_003336	UBE2A	ubiquitin-conjugating enzyme E2A (RAD6 homolog)	0	0	0	0	0	0	1	1	0	1	1
hsa-miR-223	MIMAT0000280	NM_002938	RNF4	ring finger protein 4	0	0	0	0	0	0	1	1	0	1	1
hsa-miR-223	MIMAT0000280	NM_003048	SLC9A2	solute carrier family 9 (sodium/hydrogen exchanger), member 2	0	0	1	1	0	0	0	1	0	1	0
hsa-miR-223	MIMAT0000280	NM_000052	ATP7A	ATPase, Cu++ transporting, alpha polypeptide (Menkes syndrome)	0	0	0	1	0	0	0	1	0	1	1
hsa-miR-223	MIMAT0000280	NM_003076	SMARCD1	SWI/SNF related, matrix associated, actin dependent regulator of chromatin, subfamily d, member 1	0	0	0	0	0	0	1	1	0	1	1
hsa-miR-223	MIMAT0000280	NM_004389	CTNNA2	catenin (cadherin-associated protein), alpha 2	0	0	1	1	0	0	0	1	0	1	0
hsa-miR-223	MIMAT0000280	NM_002657	PLAGL2	pleiomorphic adenoma gene-like 2	0	0	1	0	0	0	0	1	0	1	1
hsa-miR-223	MIMAT0000280	NM_005050	ABCD4	ATP-binding cassette, sub-family D (ALD), member 4	0	0	1	1	0	0	0	1	0	1	0
hsa-miR-223	MIMAT0000280	NM_005036	PPARA	peroxisome proliferator-activated receptor alpha	0	0	1	1	0	0	0	1	0	1	0
hsa-miR-223	MIMAT0000280	NM_004992	MECP2	methyl CpG binding protein 2 (Rett syndrome)	0	0	1	0	0	0	1	1	0	1	0
hsa-miR-223	MIMAT0000280	NM_004895	NLRP3	NLR family, pyrin domain containing 3	0	0	0	1	0	0	1	1	0	1	0
hsa-miR-223	MIMAT0000280	NM_004863	SPTLC2	serine palmitoyltransferase, long chain base subunit 2	0	0	1	1	0	0	0	1	0	1	0
hsa-miR-223	MIMAT0000280	NM_004811	LPXN	leupaxin	0	0	0	0	0	0	1	1	0	1	1
hsa-miR-223	MIMAT0000280	NM_004795	KL	klotho	0	0	1	1	0	0	0	1	0	1	0
hsa-miR-223	MIMAT0000280	NM_004666	VNN1	vanin 1	0	0	0	1	0	0	0	1	0	1	1
hsa-miR-223	MIMAT0000280	NM_002296	LBR	lamin B receptor	0	0	0	0	0	0	1	1	0	1	1
hsa-miR-223	MIMAT0000280	NM_002375	MAP4	microtubule-associated protein 4	0	0	1	1	0	0	0	1	0	1	0
hsa-miR-223	MIMAT0000280	NM_002613	PDPK1	3-phosphoinositide dependent protein kinase-1	0	0	1	0	0	0	0	1	0	1	1
hsa-miR-223	MIMAT0000280	NM_004404	SEPT2	septin 2	0	0	1	1	0	0	0	1	0	1	0
hsa-miR-223	MIMAT0000280	NM_003108	SOX11	SRY (sex determining region Y)-box 11	0	0	1	0	0	0	0	1	0	1	1
hsa-miR-223	MIMAT0000280	NM_018561	USP49	ubiquitin specific peptidase 49	0	0	1	1	0	0	0	1	0	1	0
hsa-miR-223	MIMAT0000280	NM_016308	CMPK1	cytidine monophosphate (UMP-CMP) kinase 1, cytosolic	0	0	1	1	0	0	0	1	0	1	0
hsa-miR-223	MIMAT0000280	NM_001114	ADCY7	adenylate cyclase 7	0	0	1	1	0	0	0	1	0	1	0
hsa-miR-223	MIMAT0000280	NM_016045	SLMO2	slowmo homolog 2 (Drosophila)	0	0	1	1	0	0	0	1	0	1	0
hsa-miR-223	MIMAT0000280	NM_015888	HOOK1	hook homolog 1 (Drosophila)	0	0	1	1	0	0	0	1	0	1	0
hsa-miR-223	MIMAT0000280	NM_015879	ST8SIA3	ST8 alpha-N-acetyl-neuraminide alpha-2,8-sialyltransferase 3	0	0	1	1	0	0	0	1	0	1	0
hsa-miR-223	MIMAT0000280	NM_015874	RBPJ	recombination signal binding protein for immunoglobulin kappa J region	0	0	1	0	0	0	1	1	0	1	0
hsa-miR-223	MIMAT0000280	NM_015634	KIAA1279	KIAA1279	0	0	1	1	0	0	0	1	0	1	0
hsa-miR-223	MIMAT0000280	NM_015584	POLDIP2	polymerase (DNA-directed), delta interacting protein 2	0	0	1	1	0	0	0	1	0	1	0
hsa-miR-223	MIMAT0000280	NM_015359	SLC39A14	solute carrier family 39 (zinc transporter), member 14	0	0	1	1	0	0	0	1	0	1	0
hsa-miR-223	MIMAT0000280	NM_015144	ZCCHC14	zinc finger, CCHC domain containing 14	0	0	1	0	0	0	0	1	0	1	1
hsa-miR-223	MIMAT0000280	NM_001241	CCNT2	cyclin T2	0	0	0	0	0	0	1	1	0	1	1
hsa-miR-223	MIMAT0000280	NM_015085	GARNL4	GTPase activating Rap/RanGAP domain-like 4	0	0	1	1	0	0	0	1	0	1	0
hsa-miR-223	MIMAT0000280	NM_016374	ARID4B	AT rich interactive domain 4B (RBP1-like)	0	0	1	0	0	0	1	1	0	1	0
hsa-miR-223	MIMAT0000280	NM_016396	CTDSPL2	CTD (carboxy-terminal domain, RNA polymerase II, polypeptide A) small phosphatase like 2	0	0	1	1	0	0	0	1	0	1	0
hsa-miR-223	MIMAT0000280	NM_018290	PGM2	phosphoglucomutase 2	0	0	1	1	0	0	0	1	0	1	0
hsa-miR-223	MIMAT0000280	NM_018233	OGFOD1	2-oxoglutarate and iron-dependent oxygenase domain containing 1	0	0	1	1	0	0	0	1	0	1	0
hsa-miR-223	MIMAT0000280	NM_018120	ARMC1	armadillo repeat containing 1	0	0	1	1	0	0	0	1	0	1	0
hsa-miR-223	MIMAT0000280	NM_018098	ECT2	epithelial cell transforming sequence 2 oncogene	0	0	1	1	0	0	0	1	0	1	0
hsa-miR-223	MIMAT0000280	NM_017645	FAM29A	family with sequence similarity 29, member A	0	0	1	1	0	0	0	1	0	1	0
hsa-miR-223	MIMAT0000280	NM_017634	KCTD9	potassium channel tetramerisation domain containing 9	0	0	1	1	0	0	0	1	0	1	0
hsa-miR-223	MIMAT0000280	NM_001080541	MGA	MAX gene associated	0	0	1	0	0	0	0	1	0	1	1
hsa-miR-223	MIMAT0000280	NM_017632	CDKN2AIP	CDKN2A interacting protein	0	0	1	1	0	0	0	1	0	1	0
hsa-miR-223	MIMAT0000280	NM_017443	POLE3	polymerase (DNA directed), epsilon 3 (p17 subunit)	0	0	1	1	0	0	0	1	0	1	0
hsa-miR-223	MIMAT0000280	NM_016608	ARMCX1	armadillo repeat containing, X-linked 1	0	0	1	1	0	0	0	1	0	1	0
hsa-miR-223	MIMAT0000280	NM_016530	RAB8B	RAB8B, member RAS oncogene family	0	0	1	0	0	0	0	1	0	1	1
hsa-miR-223	MIMAT0000280	NM_001081676	SCN3A	sodium channel, voltage-gated, type III, alpha subunit	0	0	0	1	0	0	0	1	0	1	1
hsa-miR-223	MIMAT0000280	NM_001455	FOXO3	forkhead box O3	0	0	0	0	0	0	1	1	0	1	1
hsa-miR-223	MIMAT0000280	NM_014951	ZNF365	zinc finger protein 365	0	0	1	1	0	0	0	1	0	1	0
hsa-miR-223	MIMAT0000280	NM_001704	BAI3	brain-specific angiogenesis inhibitor 3	0	0	0	0	0	0	1	1	0	1	1
hsa-miR-223	MIMAT0000280	NM_014057	OGN	osteoglycin	0	0	1	1	0	0	0	1	0	1	0
hsa-miR-223	MIMAT0000280	NM_001797	CDH11	cadherin 11, type 2, OB-cadherin (osteoblast)	0	0	1	1	0	0	0	1	0	1	0
hsa-miR-223	MIMAT0000280	NM_012479	YWHAG	tyrosine 3-monooxygenase/tryptophan 5-monooxygenase activation protein, gamma polypeptide	0	0	1	1	0	0	0	1	0	1	0
hsa-miR-223	MIMAT0000280	NM_012327	PIGN	phosphatidylinositol glycan anchor biosynthesis, class N	0	0	1	1	0	0	0	1	0	1	0
hsa-miR-223	MIMAT0000280	NM_012307	EPB41L3	erythrocyte membrane protein band 4.1-like 3	0	0	0	0	0	0	1	1	0	1	1
hsa-miR-223	MIMAT0000280	NM_012288	TRAM2	translocation associated membrane protein 2	0	0	1	1	0	0	0	1	0	1	0
hsa-miR-223	MIMAT0000280	NM_001802	CDR2	cerebellar degeneration-related protein 2, 62kDa	0	0	1	0	0	0	0	1	0	1	1
hsa-miR-223	MIMAT0000280	NM_007315	STAT1	signal transducer and activator of transcription 1, 91kDa	0	0	1	1	0	0	0	1	0	1	0
hsa-miR-223	MIMAT0000280	NM_007249	KLF12	Kruppel-like factor 12	0	0	1	1	0	0	0	1	0	1	0
hsa-miR-223	MIMAT0000280	NM_007247	AP1GBP1	AP1 gamma subunit binding protein 1	0	0	1	1	0	0	0	1	0	1	0
hsa-miR-223	MIMAT0000280	NM_007222	ZHX1	zinc fingers and homeoboxes 1	0	0	1	1	0	0	0	1	0	1	0
hsa-miR-223	MIMAT0000280	NM_014233	UBTF	upstream binding transcription factor, RNA polymerase I	0	0	1	0	0	0	1	1	0	1	0
hsa-miR-223	MIMAT0000280	NM_014437	SLC39A1	solute carrier family 39 (zinc transporter), member 1	0	0	1	0	0	0	0	1	0	1	1
hsa-miR-223	MIMAT0000280	NM_014944	CLSTN1	calsyntenin 1	0	0	1	1	0	0	0	1	0	1	0
hsa-miR-223	MIMAT0000280	NM_014912	CPEB3	cytoplasmic polyadenylation element binding protein 3	0	0	0	0	0	0	1	1	0	1	1
hsa-miR-223	MIMAT0000280	NM_001618	PARP1	poly (ADP-ribose) polymerase family, member 1	0	0	1	1	0	0	0	1	0	1	0
hsa-miR-223	MIMAT0000280	NM_014850	SRGAP3	SLIT-ROBO Rho GTPase activating protein 3	0	0	1	0	0	0	1	1	0	1	0
hsa-miR-223	MIMAT0000280	NM_014788	TRIM14	tripartite motif-containing 14	0	0	1	1	0	0	0	1	0	1	0
hsa-miR-223	MIMAT0000280	NM_014751	MTSS1	metastasis suppressor 1	0	0	1	1	0	0	0	1	0	1	0
hsa-miR-223	MIMAT0000280	NM_014729	TOX	thymocyte selection-associated high mobility group box	0	0	1	1	0	0	0	1	0	1	0
hsa-miR-223	MIMAT0000280	NM_014706	SART3	squamous cell carcinoma antigen recognized by T cells 3	0	0	1	1	0	0	0	1	0	1	0
hsa-miR-223	MIMAT0000280	NM_001670	ARVCF	armadillo repeat gene deletes in velocardiofacial syndrome	0	0	0	0	0	0	1	1	0	1	1
hsa-miR-223	MIMAT0000280	NM_014683	ULK2	unc-51-like kinase 2 (C. elegans)	0	0	1	1	0	0	0	1	0	1	0
hsa-miR-223	MIMAT0000280	NM_014668	GREB1	GREB1 protein	0	0	1	1	0	0	0	1	0	1	0
hsa-miR-223	MIMAT0000280	NM_014569	ZKSCAN5	zinc finger with KRAB and SCAN domains 5	0	0	1	1	0	0	0	1	0	1	0
hsa-miR-223	MIMAT0000280	NM_001914	CYB5A	cytochrome b5 type A (microsomal)	0	0	1	0	0	0	1	1	0	1	0
