# Supplementary material for: Astrocyte-Derived Small Extracellular Vesicles Regulate Dendritic Complexity through miR-26a-5p Activity
Source: Preprints.org preprint supplement (doi:10.20944/preprints202002.0250.v1), 2020-02-17
Supplement: Supplementary file 11 [file mir23a mirecords 4.xls]

## Sheet: result (13).xls
# "1" : interaction predicted; "0" : interaction not predicted.
miRNA ID	miRNA Acc	Refseq	Symbol	Description	diana	microinspector	miranda	mirtarget2	mitarget	nbmirtar	pictar	pita	rna22	rnahybrid	targetscan
hsa-miR-23a	MIMAT0000078	NM_004575	POU4F2	POU class 4 homeobox 2	0	1	1	1	0	1	1	1	0	1	1
hsa-miR-23a	MIMAT0000078	NM_000138	FBN1	fibrillin 1	0	0	1	1	0	0	1	1	0	1	1
hsa-miR-23a	MIMAT0000078	NM_000165	GJA1	gap junction protein, alpha 1, 43kDa	0	0	1	1	0	0	1	1	0	1	1
hsa-miR-23a	MIMAT0000078	NM_000609	CXCL12	chemokine (C-X-C motif) ligand 12 (stromal cell-derived factor 1)	0	0	1	1	0	0	1	1	0	1	1
hsa-miR-23a	MIMAT0000078	NM_000729	CCK	cholecystokinin	0	0	1	1	0	0	1	1	0	1	1
hsa-miR-23a	MIMAT0000078	NM_000958	PTGER4	prostaglandin E receptor 4 (subtype EP4)	0	0	1	1	0	0	1	1	0	1	1
hsa-miR-23a	MIMAT0000078	NM_001001664	SPOPL	speckle-type POZ protein-like	0	0	1	1	0	0	1	1	0	1	1
hsa-miR-23a	MIMAT0000078	NM_001003712	OSBPL8	oxysterol binding protein-like 8	0	0	1	1	0	0	1	1	0	1	1
hsa-miR-23a	MIMAT0000078	NM_001005473	PLCXD3	phosphatidylinositol-specific phospholipase C, X domain containing 3	0	0	1	1	0	0	1	1	0	1	1
hsa-miR-23a	MIMAT0000078	NM_001241	CCNT2	cyclin T2	0	0	1	1	0	0	1	1	0	1	1
hsa-miR-23a	MIMAT0000078	NM_001358	DHX15	DEAH (Asp-Glu-Ala-His) box polypeptide 15	0	0	1	1	0	0	1	1	0	1	1
hsa-miR-23a	MIMAT0000078	NM_001364	DLG2	discs, large homolog 2, chapsyn-110 (Drosophila)	0	0	1	1	0	0	1	1	0	1	1
hsa-miR-23a	MIMAT0000078	NM_002246	KCNK3	potassium channel, subfamily K, member 3	0	0	1	1	0	0	1	1	0	1	1
hsa-miR-23a	MIMAT0000078	NM_002264	KPNA1	karyopherin alpha 1 (importin alpha 5)	0	0	1	1	0	0	1	1	0	1	1
hsa-miR-23a	MIMAT0000078	NM_002296	LBR	lamin B receptor	0	0	1	1	0	0	1	1	0	1	1
hsa-miR-23a	MIMAT0000078	NM_002480	PPP1R12A	protein phosphatase 1, regulatory (inhibitor) subunit 12A	0	0	1	1	0	0	1	1	0	1	1
hsa-miR-23a	MIMAT0000078	NM_002658	PLAU	plasminogen activator, urokinase	0	0	1	1	0	0	1	1	0	1	1
hsa-miR-23a	MIMAT0000078	NM_002971	SATB1	SATB homeobox 1	0	0	1	1	0	0	1	1	0	1	1
hsa-miR-23a	MIMAT0000078	NM_003244	TGIF1	TGFB-induced factor homeobox 1	0	0	1	1	0	0	1	1	0	1	1
hsa-miR-23a	MIMAT0000078	NM_003286	TOP1	topoisomerase (DNA) I	0	0	1	1	0	0	1	1	0	1	1
hsa-miR-23a	MIMAT0000078	NM_003338	UBE2D1	ubiquitin-conjugating enzyme E2D 1 (UBC4/5 homolog, yeast)	0	0	1	1	0	0	1	1	0	1	1
hsa-miR-23a	MIMAT0000078	NM_003412	ZIC1	Zic family member 1 (odd-paired homolog, Drosophila)	0	0	1	1	0	0	1	1	0	1	1
hsa-miR-23a	MIMAT0000078	NM_003453	ZMYM2	zinc finger, MYM-type 2	0	0	1	1	0	0	1	1	0	1	1
hsa-miR-23a	MIMAT0000078	NM_003590	CUL3	cullin 3	0	0	1	1	0	0	1	1	0	1	1
hsa-miR-23a	MIMAT0000078	NM_003759	SLC4A4	solute carrier family 4, sodium bicarbonate cotransporter, member 4	0	0	1	1	0	0	1	1	0	1	1
hsa-miR-23a	MIMAT0000078	NM_003783	B3GALT2	UDP-Gal:betaGlcNAc beta 1,3-galactosyltransferase, polypeptide 2	0	0	1	1	0	0	1	1	0	1	1
hsa-miR-23a	MIMAT0000078	NM_003895	SYNJ1	synaptojanin 1	0	0	1	1	0	0	1	1	0	1	1
hsa-miR-23a	MIMAT0000078	NM_004060	CCNG1	cyclin G1	0	0	1	1	0	0	1	1	0	1	1
hsa-miR-23a	MIMAT0000078	NM_004801	NRXN1	neurexin 1	0	0	1	1	0	0	1	1	0	1	1
hsa-miR-23a	MIMAT0000078	NM_005561	LAMP1	lysosomal-associated membrane protein 1	0	0	1	1	0	0	1	1	0	1	1
hsa-miR-23a	MIMAT0000078	NM_005729	PPIF	peptidylprolyl isomerase F (cyclophilin F)	0	0	1	1	0	0	1	1	0	1	1
hsa-miR-23a	MIMAT0000078	NM_005842	SPRY2	sprouty homolog 2 (Drosophila)	0	0	1	1	0	0	1	1	0	1	1
hsa-miR-23a	MIMAT0000078	NM_005896	IDH1	isocitrate dehydrogenase 1 (NADP+), soluble	0	0	1	1	0	0	1	1	0	1	1
hsa-miR-23a	MIMAT0000078	NM_006224	PITPNA	phosphatidylinositol transfer protein, alpha	0	0	1	1	0	0	1	1	0	1	1
hsa-miR-23a	MIMAT0000078	NM_006246	PPP2R5E	protein phosphatase 2, regulatory subunit B", epsilon isoform	0	0	1	1	0	0	1	1	0	1	1
hsa-miR-23a	MIMAT0000078	NM_006352	ZNF238	zinc finger protein 238	0	0	1	1	0	0	1	1	0	1	1
hsa-miR-23a	MIMAT0000078	NM_006439	MAB21L2	mab-21-like 2 (C. elegans)	0	0	1	1	0	0	1	1	0	1	1
hsa-miR-23a	MIMAT0000078	NM_006698	BLCAP	bladder cancer associated protein	0	0	1	1	0	0	1	1	0	1	1
hsa-miR-23a	MIMAT0000078	NM_006876	B3GNT1	UDP-GlcNAc:betaGal beta-1,3-N-acetylglucosaminyltransferase 1	0	0	1	1	0	0	1	1	0	1	1
hsa-miR-23a	MIMAT0000078	NM_007231	SLC6A14	solute carrier family 6 (amino acid transporter), member 14	0	0	1	1	0	0	1	1	0	1	1
hsa-miR-23a	MIMAT0000078	NM_007275	TUSC2	tumor suppressor candidate 2	0	0	1	1	0	0	1	1	0	1	1
hsa-miR-23a	MIMAT0000078	NM_012129	CLDN12	claudin 12	0	0	1	1	0	0	1	1	0	1	1
hsa-miR-23a	MIMAT0000078	NM_012250	RRAS2	related RAS viral (r-ras) oncogene homolog 2	0	0	1	1	0	0	1	1	0	1	1
hsa-miR-23a	MIMAT0000078	NM_012290	TLK1	tousled-like kinase 1	0	0	1	1	0	0	1	1	0	1	1
hsa-miR-23a	MIMAT0000078	NM_012448	STAT5B	signal transducer and activator of transcription 5B	0	0	1	1	0	0	1	1	0	1	1
hsa-miR-23a	MIMAT0000078	NM_012478	WBP2	WW domain binding protein 2	0	0	1	1	0	0	1	1	0	1	1
hsa-miR-23a	MIMAT0000078	NM_012479	YWHAG	tyrosine 3-monooxygenase/tryptophan 5-monooxygenase activation protein, gamma polypeptide	0	0	1	1	0	0	1	1	0	1	1
hsa-miR-23a	MIMAT0000078	NM_013261	PPARGC1A	peroxisome proliferator-activated receptor gamma, coactivator 1 alpha	0	0	1	1	0	0	1	1	0	1	1
hsa-miR-23a	MIMAT0000078	NM_014034	ASF1A	ASF1 anti-silencing function 1 homolog A (S. cerevisiae)	0	0	1	1	0	0	1	1	0	1	1
hsa-miR-23a	MIMAT0000078	NM_014283	C1orf9	chromosome 1 open reading frame 9	0	0	1	1	0	0	1	1	0	1	1
hsa-miR-23a	MIMAT0000078	NM_014397	NEK6	NIMA (never in mitosis gene a)-related kinase 6	0	0	1	1	0	0	1	1	0	1	1
hsa-miR-23a	MIMAT0000078	NM_014494	TNRC6A	trinucleotide repeat containing 6A	0	0	1	1	0	0	1	1	0	1	1
hsa-miR-23a	MIMAT0000078	NM_014751	MTSS1	metastasis suppressor 1	0	0	1	1	0	0	1	1	0	1	1
hsa-miR-23a	MIMAT0000078	NM_014904	RAB11FIP2	RAB11 family interacting protein 2 (class I)	0	0	1	1	0	0	1	1	0	1	1
hsa-miR-23a	MIMAT0000078	NM_015215	CAMTA1	calmodulin binding transcription activator 1	0	0	1	1	0	0	1	1	0	1	1
hsa-miR-23a	MIMAT0000078	NM_015265	SATB2	SATB homeobox 2	0	0	1	1	0	0	1	1	0	1	1
hsa-miR-23a	MIMAT0000078	NM_015554	GLCE	glucuronic acid epimerase	0	0	1	1	0	0	1	1	0	1	1
hsa-miR-23a	MIMAT0000078	NM_015577	RAI14	retinoic acid induced 14	0	0	1	1	0	0	1	1	0	1	1
hsa-miR-23a	MIMAT0000078	NM_015891	CDC40	cell division cycle 40 homolog (S. cerevisiae)	0	0	1	1	0	0	1	1	0	1	1
hsa-miR-23a	MIMAT0000078	NM_016289	CAB39	calcium binding protein 39	0	0	1	1	0	0	1	1	0	1	1
hsa-miR-23a	MIMAT0000078	NM_017749	AMBRA1	autophagy/beclin-1 regulator 1	0	0	1	1	0	0	1	1	0	1	1
hsa-miR-23a	MIMAT0000078	NM_018133	MSL2L1	male-specific lethal 2-like 1 (Drosophila)	0	0	1	1	0	0	1	1	0	1	1
hsa-miR-23a	MIMAT0000078	NM_018490	LGR4	leucine-rich repeat-containing G protein-coupled receptor 4	0	0	1	1	0	0	1	1	0	1	1
hsa-miR-23a	MIMAT0000078	NM_019106	2003-09-01	septin 3	0	0	1	1	0	0	1	1	0	1	1
hsa-miR-23a	MIMAT0000078	NM_020228	PRDM10	PR domain containing 10	0	0	1	1	0	0	1	1	0	1	1
hsa-miR-23a	MIMAT0000078	NM_020382	SETD8	SET domain containing (lysine methyltransferase) 8	0	0	1	1	0	0	1	1	0	1	1
hsa-miR-23a	MIMAT0000078	NM_020772	NUFIP2	nuclear fragile X mental retardation protein interacting protein 2	0	0	1	1	0	0	1	1	0	1	1
hsa-miR-23a	MIMAT0000078	NM_020809	ARHGAP20	Rho GTPase activating protein 20	0	0	1	1	0	0	1	1	0	1	1
hsa-miR-23a	MIMAT0000078	NM_020856	TSHZ3	teashirt zinc finger homeobox 3	0	0	1	1	0	0	1	1	0	1	1
hsa-miR-23a	MIMAT0000078	NM_020921	NIN	ninein (GSK3B interacting protein)	0	0	1	1	0	0	1	1	0	1	1
hsa-miR-23a	MIMAT0000078	NM_021140	UTX	ubiquitously transcribed tetratricopeptide repeat, X chromosome	0	0	1	1	0	0	1	1	0	1	1
hsa-miR-23a	MIMAT0000078	NM_022143	LRRC4	leucine rich repeat containing 4	0	0	1	1	0	0	1	1	0	1	1
hsa-miR-23a	MIMAT0000078	NM_022894	PAPOLG	poly(A) polymerase gamma	0	0	1	1	0	0	1	1	0	1	1
hsa-miR-23a	MIMAT0000078	NM_022898	BCL11B	B-cell CLL/lymphoma 11B (zinc finger protein)	0	0	1	1	0	0	1	1	0	1	1
hsa-miR-23a	MIMAT0000078	NM_024563	C5orf23	chromosome 5 open reading frame 23	0	0	1	1	0	0	1	1	0	1	1
hsa-miR-23a	MIMAT0000078	NM_024808	C13orf34	chromosome 13 open reading frame 34	0	0	1	1	0	0	1	1	0	1	1
hsa-miR-23a	MIMAT0000078	NM_024835	GGNBP2	gametogenetin binding protein 2	0	0	1	1	0	0	1	1	0	1	1
hsa-miR-23a	MIMAT0000078	NM_025235	TNKS2	tankyrase, TRF1-interacting ankyrin-related ADP-ribose polymerase 2	0	0	1	1	0	0	1	1	0	1	1
hsa-miR-23a	MIMAT0000078	NM_030627	CPEB4	cytoplasmic polyadenylation element binding protein 4	0	0	1	1	0	0	1	1	0	1	1
hsa-miR-23a	MIMAT0000078	NM_030751	ZEB1	zinc finger E-box binding homeobox 1	0	0	1	1	0	0	1	1	0	1	1
hsa-miR-23a	MIMAT0000078	NM_030918	SNX27	sorting nexin family member 27	0	0	1	1	0	0	1	1	0	1	1
hsa-miR-23a	MIMAT0000078	NM_030952	NUAK2	NUAK family, SNF1-like kinase, 2	0	0	1	1	0	0	1	1	0	1	1
hsa-miR-23a	MIMAT0000078	NM_032435	KIAA1804	mixed lineage kinase 4	0	0	1	1	0	0	1	1	0	1	1
hsa-miR-23a	MIMAT0000078	NM_032588	TRIM63	tripartite motif-containing 63	0	0	1	1	0	0	1	1	0	1	1
hsa-miR-23a	MIMAT0000078	NM_033389	SSH2	slingshot homolog 2 (Drosophila)	0	0	1	1	0	0	1	1	0	1	1
hsa-miR-23a	MIMAT0000078	NM_033426	KIAA1737	KIAA1737	0	0	1	1	0	0	1	1	0	1	1
hsa-miR-23a	MIMAT0000078	NM_033542	SYS1	SYS1 Golgi-localized integral membrane protein homolog (S. cerevisiae)	0	0	1	1	0	0	1	1	0	1	1
hsa-miR-23a	MIMAT0000078	NM_057175	NARG1	NMDA receptor regulated 1	0	0	1	1	0	0	1	1	0	1	1
hsa-miR-23a	MIMAT0000078	NM_058237	KIAA1622	KIAA1622	0	0	1	1	0	0	1	1	0	1	1
hsa-miR-23a	MIMAT0000078	NM_080862	SPSB4	splA/ryanodine receptor domain and SOCS box containing 4	0	0	1	1	0	0	1	1	0	1	1
hsa-miR-23a	MIMAT0000078	NM_139279	MCFD2	multiple coagulation factor deficiency 2	0	0	1	1	0	0	1	1	0	1	1
hsa-miR-23a	MIMAT0000078	NM_144653	BTBD14A	BTB (POZ) domain containing 14A	0	0	1	1	0	0	1	1	0	1	1
hsa-miR-23a	MIMAT0000078	NM_147192	DMBX1	diencephalon/mesencephalon homeobox 1	0	0	1	1	0	0	1	1	0	1	1
hsa-miR-23a	MIMAT0000078	NM_152261	C12orf23	chromosome 12 open reading frame 23	0	0	1	1	0	0	1	1	0	1	1
hsa-miR-23a	MIMAT0000078	NM_152787	MAP3K7IP3	mitogen-activated protein kinase kinase kinase 7 interacting protein 3	0	0	1	1	0	0	1	1	0	1	1
hsa-miR-23a	MIMAT0000078	NM_153619	SEMA6D	sema domain, transmembrane domain (TM), and cytoplasmic domain, (semaphorin) 6D	0	0	1	1	0	0	1	1	0	1	1
hsa-miR-23a	MIMAT0000078	NM_153689	FLJ38973	hypothetical protein FLJ38973	0	0	1	1	0	0	1	1	0	1	1
hsa-miR-23a	MIMAT0000078	NM_153757	NAP1L5	nucleosome assembly protein 1-like 5	0	0	1	1	0	0	1	1	0	1	1
hsa-miR-23a	MIMAT0000078	NM_172020	POM121	POM121 membrane glycoprotein (rat)	0	0	1	1	0	0	1	1	0	1	1
hsa-miR-23a	MIMAT0000078	NM_177424	STX12	syntaxin 12	0	0	1	1	0	0	1	1	0	1	1
hsa-miR-23a	MIMAT0000078	NM_181359	IL6R	interleukin 6 receptor	0	0	1	1	0	0	1	1	0	1	1
hsa-miR-23a	MIMAT0000078	NM_181836	TMED7	transmembrane emp24 protein transport domain containing 7	0	0	1	1	0	0	1	1	0	1	1
hsa-miR-23a	MIMAT0000078	NM_207297	MBNL1	muscleblind-like (Drosophila)	0	0	1	1	0	0	1	1	0	1	1
hsa-miR-23a	MIMAT0000078	NM_000067	CA2	carbonic anhydrase II	0	0	0	1	0	0	1	1	0	1	1
hsa-miR-23a	MIMAT0000078	NM_000092	COL4A4	collagen, type IV, alpha 4	0	0	1	1	0	0	0	1	0	1	1
hsa-miR-23a	MIMAT0000078	NM_000332	ATXN1	ataxin 1	0	0	1	0	0	0	1	1	0	1	1
hsa-miR-23a	MIMAT0000078	NM_000503	EYA1	eyes absent homolog 1 (Drosophila)	0	0	1	0	0	0	1	1	0	1	1
hsa-miR-23a	MIMAT0000078	NM_000565	IL6R	interleukin 6 receptor	0	0	1	1	0	0	1	1	0	1	0
hsa-miR-23a	MIMAT0000078	NM_000641	IL11	interleukin 11	0	0	0	1	0	0	1	1	0	1	1
hsa-miR-23a	MIMAT0000078	NM_000682	ADRA2B	adrenergic, alpha-2B-, receptor	0	0	1	0	0	0	1	1	0	1	1
hsa-miR-23a	MIMAT0000078	NM_000868	HTR2C	5-hydroxytryptamine (serotonin) receptor 2C	0	0	1	0	0	0	1	1	0	1	1
hsa-miR-23a	MIMAT0000078	NM_001002906	XKRY2	XK, Kell blood group complex subunit-related, Y-linked 2	0	0	1	1	0	0	1	0	0	1	1
hsa-miR-23a	MIMAT0000078	NM_001003681	HMG2L1	high-mobility group protein 2-like 1	0	0	0	1	0	0	1	1	0	1	1
hsa-miR-23a	MIMAT0000078	NM_001005266	C15orf21	chromosome 15 open reading frame 21	0	0	0	1	0	0	1	1	0	1	1
hsa-miR-23a	MIMAT0000078	NM_001005268	C15orf21	chromosome 15 open reading frame 21	0	0	1	1	0	0	1	1	0	1	0
hsa-miR-23a	MIMAT0000078	NM_001005463	EBF3	early B-cell factor 3	0	0	0	1	0	0	1	1	0	1	1
hsa-miR-23a	MIMAT0000078	NM_001005476	PKP4	plakophilin 4	0	0	0	1	0	0	1	1	0	1	1
hsa-miR-23a	MIMAT0000078	NM_001008738	FNIP1	folliculin interacting protein 1	0	0	1	1	0	0	0	1	0	1	1
hsa-miR-23a	MIMAT0000078	NM_001012329	CTNNBIP1	catenin, beta interacting protein 1	0	0	1	1	0	0	0	1	0	1	1
hsa-miR-23a	MIMAT0000078	NM_001017369	SC4MOL	sterol-C4-methyl oxidase-like	0	0	1	1	0	0	0	1	0	1	1
hsa-miR-23a	MIMAT0000078	NM_001024843	TNRC6B	trinucleotide repeat containing 6B	0	0	1	1	0	0	0	1	0	1	1
hsa-miR-23a	MIMAT0000078	NM_001024847	TGFBR2	transforming growth factor, beta receptor II (70/80kDa)	0	0	1	1	0	0	0	1	0	1	1
hsa-miR-23a	MIMAT0000078	NM_001024948	FNBP1L	formin binding protein 1-like	0	0	1	1	0	0	0	1	0	1	1
hsa-miR-23a	MIMAT0000078	NM_001025077	CUGBP2	CUG triplet repeat, RNA binding protein 2	0	0	1	1	0	0	0	1	0	1	1
hsa-miR-23a	MIMAT0000078	NM_001031812	CSNK1G3	casein kinase 1, gamma 3	0	0	1	1	0	0	0	1	0	1	1
hsa-miR-23a	MIMAT0000078	NM_001032283	TMPO	thymopoietin	0	0	1	1	0	0	0	1	0	1	1
hsa-miR-23a	MIMAT0000078	NM_001033117	SRGAP3	SLIT-ROBO Rho GTPase activating protein 3	0	0	1	1	0	0	0	1	0	1	1
hsa-miR-23a	MIMAT0000078	NM_001039618	CREBZF	CREB/ATF bZIP transcription factor	0	0	1	1	0	0	0	1	0	1	1
hsa-miR-23a	MIMAT0000078	NM_001039762	C10orf141	chromosome 10 open reading frame 141	0	0	1	1	0	0	0	1	0	1	1
hsa-miR-23a	MIMAT0000078	NM_001040022	SIRPA	signal-regulatory protein alpha	0	0	1	1	0	0	0	1	0	1	1
hsa-miR-23a	MIMAT0000078	NM_001040214	NKAIN2	Na+/K+ transporting ATPase interacting 2	0	0	1	1	0	0	0	1	0	1	1
hsa-miR-23a	MIMAT0000078	NM_001042383	CEP63	centrosomal protein 63kDa	0	0	1	1	0	0	0	1	0	1	1
hsa-miR-23a	MIMAT0000078	NM_001042599	ERBB4	v-erb-a erythroblastic leukemia viral oncogene homolog 4 (avian)	0	0	1	1	0	0	0	1	0	1	1
hsa-miR-23a	MIMAT0000078	NM_001077188	HS6ST2	heparan sulfate 6-O-sulfotransferase 2	0	0	1	1	0	0	0	1	0	1	1
hsa-miR-23a	MIMAT0000078	NM_001080430	TOX3	TOX high mobility group box family member 3	0	0	1	1	0	0	0	1	0	1	1
hsa-miR-23a	MIMAT0000078	NM_001080435	WHDC1	WAS protein homology region 2 domain containing 1	0	0	1	1	0	0	0	1	0	1	1
hsa-miR-23a	MIMAT0000078	NM_001080470	ZNF697	zinc finger protein 697	0	0	1	1	0	0	0	1	0	1	1
hsa-miR-23a	MIMAT0000078	NM_001080975	REPS2	RALBP1 associated Eps domain containing 2	0	0	1	1	0	0	0	1	0	1	1
hsa-miR-23a	MIMAT0000078	NM_001081559	CPSF4	cleavage and polyadenylation specific factor 4, 30kDa	0	0	1	1	0	0	0	1	0	1	1
hsa-miR-23a	MIMAT0000078	NM_001198	PRDM1	PR domain containing 1, with ZNF domain	0	0	1	0	0	0	1	1	0	1	1
hsa-miR-23a	MIMAT0000078	NM_001227	CASP7	caspase 7, apoptosis-related cysteine peptidase	0	0	1	1	0	0	1	1	0	1	0
hsa-miR-23a	MIMAT0000078	NM_001239	CCNH	cyclin H	0	0	0	1	0	0	1	1	0	1	1
hsa-miR-23a	MIMAT0000078	NM_001249	ENTPD5	ectonucleoside triphosphate diphosphohydrolase 5	0	0	0	1	0	0	1	1	0	1	1
hsa-miR-23a	MIMAT0000078	NM_001278	CHUK	conserved helix-loop-helix ubiquitous kinase	0	0	0	1	0	0	1	1	0	1	1
hsa-miR-23a	MIMAT0000078	NM_001401	LPAR1	lysophosphatidic acid receptor 1	0	0	0	1	0	0	1	1	0	1	1
hsa-miR-23a	MIMAT0000078	NM_001422	ELF5	E74-like factor 5 (ets domain transcription factor)	0	0	0	1	0	0	1	1	0	1	1
hsa-miR-23a	MIMAT0000078	NM_001543	NDST1	N-deacetylase/N-sulfotransferase (heparan glucosaminyl) 1	0	0	1	0	0	0	1	1	0	1	1
hsa-miR-23a	MIMAT0000078	NM_001693	ATP6V1B2	ATPase, H+ transporting, lysosomal 56/58kDa, V1 subunit B2	0	0	0	1	0	0	1	1	0	1	1
hsa-miR-23a	MIMAT0000078	NM_001696	ATP6V1E1	ATPase, H+ transporting, lysosomal 31kDa, V1 subunit E1	0	0	1	1	0	0	1	1	0	1	0
hsa-miR-23a	MIMAT0000078	NM_001698	AUH	AU RNA binding protein/enoyl-Coenzyme A hydratase	0	0	0	1	0	0	1	1	0	1	1
hsa-miR-23a	MIMAT0000078	NM_001742	CALCR	calcitonin receptor	0	0	1	0	0	0	1	1	0	1	1
hsa-miR-23a	MIMAT0000078	NM_001829	CLCN3	chloride channel 3	0	0	1	0	0	0	1	1	0	1	1
hsa-miR-23a	MIMAT0000078	NM_001981	EPS15	epidermal growth factor receptor pathway substrate 15	0	0	0	1	0	0	1	1	0	1	1
hsa-miR-23a	MIMAT0000078	NM_001999	FBN2	fibrillin 2 (congenital contractural arachnodactyly)	0	0	0	1	0	0	1	1	0	1	1
hsa-miR-23a	MIMAT0000078	NM_002033	FUT4	fucosyltransferase 4 (alpha (1,3) fucosyltransferase, myeloid-specific)	0	0	0	1	0	0	1	1	0	1	1
hsa-miR-23a	MIMAT0000078	NM_002148	HOXD10	homeobox D10	0	0	0	1	0	0	1	1	0	1	1
hsa-miR-23a	MIMAT0000078	NM_002199	IRF2	interferon regulatory factor 2	0	0	0	1	0	0	1	1	0	1	1
hsa-miR-23a	MIMAT0000078	NM_002268	KPNA4	karyopherin alpha 4 (importin alpha 3)	0	0	0	1	0	0	1	1	0	1	1
hsa-miR-23a	MIMAT0000078	NM_002271	IPO5	importin 5	0	0	1	1	0	0	0	1	0	1	1
hsa-miR-23a	MIMAT0000078	NM_002335	LRP5	low density lipoprotein receptor-related protein 5	0	0	0	1	0	0	1	1	0	1	1
hsa-miR-23a	MIMAT0000078	NM_002397	MEF2C	myocyte enhancer factor 2C	0	0	0	1	0	0	1	1	0	1	1
hsa-miR-23a	MIMAT0000078	NM_002401	MAP3K3	mitogen-activated protein kinase kinase kinase 3	0	0	1	0	0	0	1	1	0	1	1
hsa-miR-23a	MIMAT0000078	NM_002438	MRC1	mannose receptor, C type 1	0	0	1	1	0	0	1	0	0	1	1
hsa-miR-23a	MIMAT0000078	NM_002603	PDE7A	phosphodiesterase 7A	0	0	1	1	0	0	1	1	0	1	0
hsa-miR-23a	MIMAT0000078	NM_002709	PPP1CB	protein phosphatase 1, catalytic subunit, beta isoform	0	0	0	1	0	0	1	1	0	1	1
hsa-miR-23a	MIMAT0000078	NM_002874	RAD23B	RAD23 homolog B (S. cerevisiae)	0	0	0	1	0	0	1	1	0	1	1
hsa-miR-23a	MIMAT0000078	NM_002901	RCN1	reticulocalbin 1, EF-hand calcium binding domain	0	0	0	1	0	0	1	1	0	1	1
hsa-miR-23a	MIMAT0000078	NM_002941	ROBO1	roundabout, axon guidance receptor, homolog 1 (Drosophila)	0	0	1	1	0	0	0	1	0	1	1
hsa-miR-23a	MIMAT0000078	NM_002942	ROBO2	roundabout, axon guidance receptor, homolog 2 (Drosophila)	0	0	1	1	0	0	0	1	0	1	1
hsa-miR-23a	MIMAT0000078	NM_003093	SNRPC	small nuclear ribonucleoprotein polypeptide C	0	0	0	1	0	0	1	1	0	1	1
hsa-miR-23a	MIMAT0000078	NM_003236	TGFA	transforming growth factor, alpha	0	0	1	0	0	0	1	1	0	1	1
hsa-miR-23a	MIMAT0000078	NM_003243	TGFBR3	transforming growth factor, beta receptor III	0	0	1	0	0	0	1	1	0	1	1
hsa-miR-23a	MIMAT0000078	NM_003275	TMOD1	tropomodulin 1	0	0	0	1	0	0	1	1	0	1	1
hsa-miR-23a	MIMAT0000078	NM_003299	HSP90B1	heat shock protein 90kDa beta (Grp94), member 1	0	0	1	0	0	0	1	1	0	1	1
hsa-miR-23a	MIMAT0000078	NM_003559	PIP4K2B	phosphatidylinositol-5-phosphate 4-kinase, type II, beta	0	0	1	1	0	0	0	1	0	1	1
hsa-miR-23a	MIMAT0000078	NM_003750	EIF3A	eukaryotic translation initiation factor 3, subunit A	0	0	0	1	0	0	1	1	0	1	1
hsa-miR-23a	MIMAT0000078	NM_003888	ALDH1A2	aldehyde dehydrogenase 1 family, member A2	0	0	0	1	0	0	1	1	0	1	1
hsa-miR-23a	MIMAT0000078	NM_003906	MCM3AP	minichromosome maintenance complex component 3 associated protein	0	0	0	1	0	0	1	1	0	1	1
hsa-miR-23a	MIMAT0000078	NM_003913	PRPF4B	PRP4 pre-mRNA processing factor 4 homolog B (yeast)	0	0	1	1	0	0	0	1	0	1	1
hsa-miR-23a	MIMAT0000078	NM_003972	BTAF1	BTAF1 RNA polymerase II, B-TFIID transcription factor-associated, 170kDa (Mot1 homolog, S. cerevisiae)	0	0	0	1	0	0	1	1	0	1	1
hsa-miR-23a	MIMAT0000078	NM_004103	PTK2B	PTK2B protein tyrosine kinase 2 beta	0	0	0	1	0	0	1	1	0	1	1
hsa-miR-23a	MIMAT0000078	NM_004133	HNF4G	hepatocyte nuclear factor 4, gamma	0	0	1	1	0	0	0	1	0	1	1
hsa-miR-23a	MIMAT0000078	NM_004170	SLC1A1	solute carrier family 1 (neuronal/epithelial high affinity glutamate transporter, system Xag), member 1	0	0	0	1	0	0	1	1	0	1	1
hsa-miR-23a	MIMAT0000078	NM_004232	SOCS6	suppressor of cytokine signaling 6	0	0	0	1	0	0	1	1	0	1	1
hsa-miR-23a	MIMAT0000078	NM_004384	CSNK1G3	casein kinase 1, gamma 3	0	0	1	1	0	0	1	1	0	1	0
hsa-miR-23a	MIMAT0000078	NM_004392	DACH1	dachshund homolog 1 (Drosophila)	0	0	1	0	0	0	1	1	0	1	1
hsa-miR-23a	MIMAT0000078	NM_004419	DUSP5	dual specificity phosphatase 5	0	0	1	0	0	0	1	1	0	1	1
hsa-miR-23a	MIMAT0000078	NM_004430	EGR3	early growth response 3	0	0	1	0	0	0	1	1	0	1	1
hsa-miR-23a	MIMAT0000078	NM_004501	HNRNPU	heterogeneous nuclear ribonucleoprotein U (scaffold attachment factor A)	0	0	0	1	0	0	1	1	0	1	1
hsa-miR-23a	MIMAT0000078	NM_004571	PKNOX1	PBX/knotted 1 homeobox 1	0	0	0	1	0	0	1	1	0	1	1
hsa-miR-23a	MIMAT0000078	NM_004677	XKRY	XK, Kell blood group complex subunit-related, Y-linked	0	0	1	1	0	0	1	0	0	1	1
hsa-miR-23a	MIMAT0000078	NM_004745	DLGAP2	discs, large (Drosophila) homolog-associated protein 2	0	0	1	0	0	0	1	1	0	1	1
hsa-miR-23a	MIMAT0000078	NM_004796	NRXN3	neurexin 3	0	0	1	0	0	0	1	1	0	1	1
hsa-miR-23a	MIMAT0000078	NM_004817	TJP2	tight junction protein 2 (zona occludens 2)	0	0	1	1	0	0	0	1	0	1	1
hsa-miR-23a	MIMAT0000078	NM_004834	MAP4K4	mitogen-activated protein kinase kinase kinase kinase 4	0	0	1	1	0	0	0	1	0	1	1
hsa-miR-23a	MIMAT0000078	NM_004854	CHST10	carbohydrate sulfotransferase 10	0	0	1	0	0	0	1	1	0	1	1
hsa-miR-23a	MIMAT0000078	NM_004947	DOCK3	dedicator of cytokinesis 3	0	0	1	1	0	0	0	1	0	1	1
hsa-miR-23a	MIMAT0000078	NM_004973	JARID2	jumonji, AT rich interactive domain 2	0	0	1	1	0	0	1	1	0	1	0
hsa-miR-23a	MIMAT0000078	NM_005100	AKAP12	A kinase (PRKA) anchor protein (gravin) 12	0	0	1	1	0	0	0	1	0	1	1
hsa-miR-23a	MIMAT0000078	NM_005120	MED12	mediator complex subunit 12	0	0	1	1	0	0	0	1	0	1	1
hsa-miR-23a	MIMAT0000078	NM_005328	HAS2	hyaluronan synthase 2	0	0	0	1	0	0	1	1	0	1	1
hsa-miR-23a	MIMAT0000078	NM_005436	CCDC6	coiled-coil domain containing 6	0	0	1	1	0	0	0	1	0	1	1
hsa-miR-23a	MIMAT0000078	NM_005487	HMG2L1	high-mobility group protein 2-like 1	0	0	1	1	0	0	1	1	0	1	0
hsa-miR-23a	MIMAT0000078	NM_005517	HMGN2	high-mobility group nucleosomal binding domain 2	0	0	0	1	0	0	1	1	0	1	1
hsa-miR-23a	MIMAT0000078	NM_005523	HOXA11	homeobox A11	0	0	1	0	0	0	1	1	0	1	1
hsa-miR-23a	MIMAT0000078	NM_005539	INPP5A	inositol polyphosphate-5-phosphatase, 40kDa	0	0	1	0	0	0	1	1	0	1	1
hsa-miR-23a	MIMAT0000078	NM_005578	LPP	LIM domain containing preferred translocation partner in lipoma	0	0	1	1	0	0	0	1	0	1	1
hsa-miR-23a	MIMAT0000078	NM_005627	SGK1	serum/glucocorticoid regulated kinase 1	0	0	1	0	0	0	1	1	0	1	1
hsa-miR-23a	MIMAT0000078	NM_005742	PDIA6	protein disulfide isomerase family A, member 6	0	0	1	0	0	0	1	1	0	1	1
hsa-miR-23a	MIMAT0000078	NM_005779	LHFPL2	lipoma HMGIC fusion partner-like 2	0	0	1	0	0	0	1	1	0	1	1
hsa-miR-23a	MIMAT0000078	NM_005868	BET1	blocked early in transport 1 homolog (S. cerevisiae)	0	0	0	1	0	0	1	1	0	1	1
hsa-miR-23a	MIMAT0000078	NM_005911	MAT2A	methionine adenosyltransferase II, alpha	0	0	1	0	0	0	1	1	0	1	1
hsa-miR-23a	MIMAT0000078	NM_005935	AFF1	AF4/FMR2 family, member 1	0	0	1	0	0	0	1	1	0	1	1
hsa-miR-23a	MIMAT0000078	NM_005938	FOXO4	forkhead box O4	0	0	1	0	0	0	1	1	0	1	1
hsa-miR-23a	MIMAT0000078	NM_005955	MTF1	metal-regulatory transcription factor 1	0	0	1	1	0	0	0	1	0	1	1
hsa-miR-23a	MIMAT0000078	NM_005963	MYH1	myosin, heavy chain 1, skeletal muscle, adult	0	0	1	0	0	0	1	1	0	1	1
hsa-miR-23a	MIMAT0000078	NM_006158	NEFL	neurofilament, light polypeptide 68kDa	0	0	1	1	0	0	0	1	0	1	1
hsa-miR-23a	MIMAT0000078	NM_006176	NRGN	neurogranin (protein kinase C substrate, RC3)	0	0	1	0	0	0	1	1	0	1	1
hsa-miR-23a	MIMAT0000078	NM_006273	CCL7	chemokine (C-C motif) ligand 7	0	0	1	1	0	0	1	1	0	0	1
hsa-miR-23a	MIMAT0000078	NM_006282	STK4	serine/threonine kinase 4	0	0	0	1	0	0	1	1	0	1	1
hsa-miR-23a	MIMAT0000078	NM_006290	TNFAIP3	tumor necrosis factor, alpha-induced protein 3	0	0	1	1	0	0	1	1	0	1	0
hsa-miR-23a	MIMAT0000078	NM_006324	CFDP1	craniofacial development protein 1	0	0	1	0	0	0	1	1	0	1	1
hsa-miR-23a	MIMAT0000078	NM_006364	SEC23A	Sec23 homolog A (S. cerevisiae)	0	0	0	1	0	0	1	1	0	1	1
hsa-miR-23a	MIMAT0000078	NM_006460	HEXIM1	hexamethylene bis-acetamide inducible 1	0	0	1	1	0	0	0	1	0	1	1
hsa-miR-23a	MIMAT0000078	NM_006561	CUGBP2	CUG triplet repeat, RNA binding protein 2	0	0	1	1	0	0	1	1	0	1	0
hsa-miR-23a	MIMAT0000078	NM_006565	CTCF	CCCTC-binding factor (zinc finger protein)	0	0	0	1	0	0	1	1	0	1	1
hsa-miR-23a	MIMAT0000078	NM_006693	CPSF4	cleavage and polyadenylation specific factor 4, 30kDa	0	0	1	1	0	0	1	1	0	1	0
hsa-miR-23a	MIMAT0000078	NM_006823	PKIA	protein kinase (cAMP-dependent, catalytic) inhibitor alpha	0	0	0	1	0	0	1	1	0	1	1
hsa-miR-23a	MIMAT0000078	NM_006874	ELF2	E74-like factor 2 (ets domain transcription factor)	0	0	0	1	0	0	1	1	0	1	1
hsa-miR-23a	MIMAT0000078	NM_007172	NUP50	nucleoporin 50kDa	0	0	1	1	0	0	0	1	0	1	1
hsa-miR-23a	MIMAT0000078	NM_007198	PROSC	proline synthetase co-transcribed homolog (bacterial)	0	0	0	1	0	0	1	1	0	1	1
hsa-miR-23a	MIMAT0000078	NM_007249	KLF12	Kruppel-like factor 12	0	0	1	1	0	0	1	1	0	1	0
hsa-miR-23a	MIMAT0000078	NM_007331	WHSC1	Wolf-Hirschhorn syndrome candidate 1	0	0	1	1	0	0	1	1	0	1	0
hsa-miR-23a	MIMAT0000078	NM_012234	RYBP	RING1 and YY1 binding protein	0	0	1	0	0	0	1	1	0	1	1
hsa-miR-23a	MIMAT0000078	NM_012297	G3BP2	GTPase activating protein (SH3 domain) binding protein 2	0	0	0	1	0	0	1	1	0	1	1
hsa-miR-23a	MIMAT0000078	NM_012309	SHANK2	SH3 and multiple ankyrin repeat domains 2	0	0	1	0	0	0	1	1	0	1	1
hsa-miR-23a	MIMAT0000078	NM_012325	MAPRE1	microtubule-associated protein, RP/EB family, member 1	0	0	0	1	0	0	1	1	0	1	1
hsa-miR-23a	MIMAT0000078	NM_013372	GREM1	gremlin 1, cysteine knot superfamily, homolog (Xenopus laevis)	0	0	1	0	0	0	1	1	0	1	1
hsa-miR-23a	MIMAT0000078	NM_013390	TMEM2	transmembrane protein 2	0	0	0	1	0	0	1	1	0	1	1
hsa-miR-23a	MIMAT0000078	NM_014071	NCOA6	nuclear receptor coactivator 6	0	0	0	1	0	0	1	1	0	1	1
hsa-miR-23a	MIMAT0000078	NM_014154	ARMC8	armadillo repeat containing 8	0	0	1	1	0	0	0	1	0	1	1
hsa-miR-23a	MIMAT0000078	NM_014250	HMG2L1	high-mobility group protein 2-like 1	0	0	1	1	0	0	1	1	0	1	0
hsa-miR-23a	MIMAT0000078	NM_014253	ODZ1	odz, odd Oz/ten-m homolog 1(Drosophila)	0	0	1	1	0	0	0	1	0	1	1
hsa-miR-23a	MIMAT0000078	NM_014289	CAPN6	calpain 6	0	0	1	0	0	0	1	1	0	1	1
hsa-miR-23a	MIMAT0000078	NM_014426	SNX5	sorting nexin 5	0	0	0	1	0	0	1	1	0	1	1
hsa-miR-23a	MIMAT0000078	NM_014616	ATP11B	ATPase, class VI, type 11B	0	0	1	1	0	0	0	1	0	1	1
hsa-miR-23a	MIMAT0000078	NM_014663	JMJD2A	jumonji domain containing 2A	0	0	0	1	0	0	1	1	0	1	1
hsa-miR-23a	MIMAT0000078	NM_014682	ST18	suppression of tumorigenicity 18 (breast carcinoma) (zinc finger protein)	0	0	0	1	0	0	1	1	0	1	1
hsa-miR-23a	MIMAT0000078	NM_014729	TOX	thymocyte selection-associated high mobility group box	0	0	0	1	0	0	1	1	0	1	1
hsa-miR-23a	MIMAT0000078	NM_014757	MAML1	mastermind-like 1 (Drosophila)	0	0	1	0	0	0	1	1	0	1	1
hsa-miR-23a	MIMAT0000078	NM_014787	DNAJC6	DnaJ (Hsp40) homolog, subfamily C, member 6	0	0	1	1	0	0	0	1	0	1	1
hsa-miR-23a	MIMAT0000078	NM_014810	CEP350	centrosomal protein 350kDa	0	0	1	1	0	0	0	1	0	1	1
hsa-miR-23a	MIMAT0000078	NM_014840	NUAK1	NUAK family, SNF1-like kinase, 1	0	0	0	1	0	0	1	1	0	1	1
hsa-miR-23a	MIMAT0000078	NM_014850	SRGAP3	SLIT-ROBO Rho GTPase activating protein 3	0	0	1	1	0	0	1	1	0	1	0
hsa-miR-23a	MIMAT0000078	NM_014905	GLS	glutaminase	0	0	1	0	0	0	1	1	0	1	1
hsa-miR-23a	MIMAT0000078	NM_014974	DIP2C	DIP2 disco-interacting protein 2 homolog C (Drosophila)	0	0	1	0	0	0	1	1	0	1	1
hsa-miR-23a	MIMAT0000078	NM_015069	ZNF423	zinc finger protein 423	0	0	0	1	0	0	1	1	0	1	1
hsa-miR-23a	MIMAT0000078	NM_015130	TBC1D9	TBC1 domain family, member 9 (with GRAM domain)	0	0	1	1	0	0	0	1	0	1	1
hsa-miR-23a	MIMAT0000078	NM_015138	RTF1	Rtf1, Paf1/RNA polymerase II complex component, homolog (S. cerevisiae)	0	0	1	0	0	0	1	1	0	1	1
hsa-miR-23a	MIMAT0000078	NM_015251	ATMIN	ATM interactor	0	0	1	1	0	0	0	1	0	1	1
hsa-miR-23a	MIMAT0000078	NM_015316	PPP1R13B	protein phosphatase 1, regulatory (inhibitor) subunit 13B	0	0	1	0	0	0	1	1	0	1	1
hsa-miR-23a	MIMAT0000078	NM_015317	PUM2	pumilio homolog 2 (Drosophila)	0	0	1	0	0	0	1	1	0	1	1
hsa-miR-23a	MIMAT0000078	NM_015569	DNM3	dynamin 3	0	0	1	0	0	0	1	1	0	1	1
hsa-miR-23a	MIMAT0000078	NM_015626	WSB1	WD repeat and SOCS box-containing 1	0	0	1	0	0	0	1	1	0	1	1
hsa-miR-23a	MIMAT0000078	NM_015693	INTU	inturned planar cell polarity effector homolog (Drosophila)	0	0	0	1	0	0	1	1	0	1	1
hsa-miR-23a	MIMAT0000078	NM_015986	CRLF3	cytokine receptor-like factor 3	0	0	1	1	0	0	1	1	0	1	0
hsa-miR-23a	MIMAT0000078	NM_016081	PALLD	palladin, cytoskeletal associated protein	0	0	1	0	0	0	1	1	0	1	1
hsa-miR-23a	MIMAT0000078	NM_016206	VGLL3	vestigial like 3 (Drosophila)	0	0	1	1	0	0	0	1	0	1	1
hsa-miR-23a	MIMAT0000078	NM_016235	GPRC5B	G protein-coupled receptor, family C, group 5, member B	0	0	0	1	0	0	1	1	0	1	1
hsa-miR-23a	MIMAT0000078	NM_016523	KLRF1	killer cell lectin-like receptor subfamily F, member 1	0	0	1	1	0	0	1	1	0	1	0
hsa-miR-23a	MIMAT0000078	NM_016531	KLF3	Kruppel-like factor 3 (basic)	0	0	0	1	0	0	1	1	0	1	1
hsa-miR-23a	MIMAT0000078	NM_016603	FAM13B1	family with sequence similarity 13, member B1	0	0	1	0	0	0	1	1	0	1	1
hsa-miR-23a	MIMAT0000078	NM_016626	MEX3C	mex-3 homolog C (C. elegans)	0	0	0	1	0	0	1	1	0	1	1
hsa-miR-23a	MIMAT0000078	NM_017533	MYH4	myosin, heavy chain 4, skeletal muscle	0	0	1	0	0	0	1	1	0	1	1
hsa-miR-23a	MIMAT0000078	NM_017673	C1orf26	chromosome 1 open reading frame 26	0	0	1	1	0	0	0	1	0	1	1
hsa-miR-23a	MIMAT0000078	NM_017742	ZCCHC2	zinc finger, CCHC domain containing 2	0	0	1	0	0	0	1	1	0	1	1
hsa-miR-23a	MIMAT0000078	NM_017747	ANKHD1	ankyrin repeat and KH domain containing 1	0	0	0	1	0	0	1	1	0	1	1
hsa-miR-23a	MIMAT0000078	NM_017763	RNF43	ring finger protein 43	0	0	1	0	0	0	1	1	0	1	1
hsa-miR-23a	MIMAT0000078	NM_017780	CHD7	chromodomain helicase DNA binding protein 7	0	0	1	0	0	0	1	1	0	1	1
hsa-miR-23a	MIMAT0000078	NM_017919	STX17	syntaxin 17	0	0	0	1	0	0	1	1	0	1	1
hsa-miR-23a	MIMAT0000078	NM_017987	RUFY2	RUN and FYVE domain containing 2	0	0	1	1	0	0	0	1	0	1	1
hsa-miR-23a	MIMAT0000078	NM_018015	CXorf57	chromosome X open reading frame 57	0	0	0	1	0	0	1	1	0	1	1
hsa-miR-23a	MIMAT0000078	NM_018165	PBRM1	polybromo 1	0	0	1	1	0	0	0	1	0	1	1
hsa-miR-23a	MIMAT0000078	NM_018227	UBA6	ubiquitin-like modifier activating enzyme 6	0	0	1	0	0	0	1	1	0	1	1
hsa-miR-23a	MIMAT0000078	NM_018364	RSBN1	round spermatid basic protein 1	0	0	1	0	0	0	1	1	0	1	1
hsa-miR-23a	MIMAT0000078	NM_018638	ETNK1	ethanolamine kinase 1	0	0	1	1	0	0	0	1	0	1	1
hsa-miR-23a	MIMAT0000078	NM_018660	ZNF395	zinc finger protein 395	0	0	0	1	0	0	1	1	0	1	1
hsa-miR-23a	MIMAT0000078	NM_019049	DENND1B	DENN/MADD domain containing 1B	0	0	1	0	0	0	1	1	0	1	1
hsa-miR-23a	MIMAT0000078	NM_019080	NDFIP2	Nedd4 family interacting protein 2	0	0	1	1	0	0	0	1	0	1	1
hsa-miR-23a	MIMAT0000078	NM_019886	CHST7	carbohydrate (N-acetylglucosamine 6-O) sulfotransferase 7	0	0	1	1	0	0	0	1	0	1	1
hsa-miR-23a	MIMAT0000078	NM_020168	PAK6	p21 protein (Cdc42/Rac)-activated kinase 6	0	0	0	1	0	0	1	1	0	1	1
hsa-miR-23a	MIMAT0000078	NM_020248	CTNNBIP1	catenin, beta interacting protein 1	0	0	1	1	0	0	1	1	0	1	0
hsa-miR-23a	MIMAT0000078	NM_020337	ANKRD50	ankyrin repeat domain 50	0	0	1	1	0	0	0	1	0	1	1
hsa-miR-23a	MIMAT0000078	NM_020463	SMEK2	SMEK homolog 2, suppressor of mek1 (Dictyostelium)	0	0	1	0	0	0	1	1	0	1	1
hsa-miR-23a	MIMAT0000078	NM_020706	SFRS15	splicing factor, arginine/serine-rich 15	0	0	1	0	0	0	1	1	0	1	1
hsa-miR-23a	MIMAT0000078	NM_020718	USP31	ubiquitin specific peptidase 31	0	0	1	1	0	0	0	1	0	1	1
hsa-miR-23a	MIMAT0000078	NM_020810	TRMT5	TRM5 tRNA methyltransferase 5 homolog (S. cerevisiae)	0	0	1	1	0	0	0	1	0	1	1
hsa-miR-23a	MIMAT0000078	NM_020841	OSBPL8	oxysterol binding protein-like 8	0	0	1	1	0	0	1	1	0	1	0
hsa-miR-23a	MIMAT0000078	NM_020853	KIAA1467	KIAA1467	0	0	1	1	0	0	0	1	0	1	1
hsa-miR-23a	MIMAT0000078	NM_020858	SEMA6D	sema domain, transmembrane domain (TM), and cytoplasmic domain, (semaphorin) 6D	0	0	1	1	0	0	1	1	0	1	0
hsa-miR-23a	MIMAT0000078	NM_020924	ZBTB26	zinc finger and BTB domain containing 26	0	0	1	1	0	0	1	1	0	1	0
hsa-miR-23a	MIMAT0000078	NM_021038	MBNL1	muscleblind-like (Drosophila)	0	0	1	1	0	0	1	1	0	1	0
hsa-miR-23a	MIMAT0000078	NM_021239	RBM25	RNA binding motif protein 25	0	0	1	1	0	0	0	1	0	1	1
hsa-miR-23a	MIMAT0000078	NM_021961	TEAD1	TEA domain family member 1 (SV40 transcriptional enhancer factor)	0	0	1	0	0	0	1	1	0	1	1
hsa-miR-23a	MIMAT0000078	NM_021982	SEC24A	SEC24 related gene family, member A (S. cerevisiae)	0	0	1	1	0	0	0	1	0	1	1
hsa-miR-23a	MIMAT0000078	NM_022037	TIA1	TIA1 cytotoxic granule-associated RNA binding protein	0	0	1	1	0	0	0	1	0	1	1
hsa-miR-23a	MIMAT0000078	NM_022469	GREM2	gremlin 2, cysteine knot superfamily, homolog (Xenopus laevis)	0	0	1	0	0	0	1	1	0	1	1
hsa-miR-23a	MIMAT0000078	NM_022474	MPP5	membrane protein, palmitoylated 5 (MAGUK p55 subfamily member 5)	0	0	1	0	0	0	1	1	0	1	1
hsa-miR-23a	MIMAT0000078	NM_022753	S100PBP	S100P binding protein	0	0	1	0	0	0	1	1	0	1	1
hsa-miR-23a	MIMAT0000078	NM_022893	BCL11A	B-cell CLL/lymphoma 11A (zinc finger protein)	0	0	1	0	0	0	1	1	0	1	1
hsa-miR-23a	MIMAT0000078	NM_022912	REEP1	receptor accessory protein 1	0	0	1	1	0	0	0	1	0	1	1
hsa-miR-23a	MIMAT0000078	NM_022913	GPBP1	GC-rich promoter binding protein 1	0	0	0	1	0	0	1	1	0	1	1
hsa-miR-23a	MIMAT0000078	NM_023067	FOXL2	forkhead box L2	0	0	1	0	0	0	1	1	0	1	1
hsa-miR-23a	MIMAT0000078	NM_023112	OTUB2	OTU domain, ubiquitin aldehyde binding 2	0	0	1	0	0	0	1	1	0	1	1
hsa-miR-23a	MIMAT0000078	NM_024015	HOXB4	homeobox B4	0	0	0	1	0	0	1	1	0	1	1
hsa-miR-23a	MIMAT0000078	NM_024090	ELOVL6	ELOVL family member 6, elongation of long chain fatty acids (FEN1/Elo2, SUR4/Elo3-like, yeast)	0	0	0	1	0	0	1	1	0	1	1
hsa-miR-23a	MIMAT0000078	NM_024523	GCC1	GRIP and coiled-coil domain containing 1	0	0	1	0	0	0	1	1	0	1	1
hsa-miR-23a	MIMAT0000078	NM_024721	ZFHX4	zinc finger homeobox 4	0	0	1	1	0	0	0	1	0	1	1
hsa-miR-23a	MIMAT0000078	NM_024909	C6orf134	chromosome 6 open reading frame 134	1	1	1	0	0	0	0	0	1	1	0
hsa-miR-23a	MIMAT0000078	NM_025133	FBXO11	F-box protein 11	0	0	0	1	0	0	1	1	0	1	1
hsa-miR-23a	MIMAT0000078	NM_025195	TRIB1	tribbles homolog 1 (Drosophila)	0	0	0	1	0	0	1	1	0	1	1
hsa-miR-23a	MIMAT0000078	NM_030613	ZFP2	zinc finger protein 2 homolog (mouse)	0	0	0	1	0	0	1	1	0	1	1
hsa-miR-23a	MIMAT0000078	NM_030661	HOXA3	homeobox A3	0	0	1	1	0	0	0	1	0	1	1
hsa-miR-23a	MIMAT0000078	NM_031844	HNRNPU	heterogeneous nuclear ribonucleoprotein U (scaffold attachment factor A)	0	0	1	1	0	0	1	1	0	1	0
hsa-miR-23a	MIMAT0000078	NM_032016	STARD3NL	STARD3 N-terminal like	0	0	1	0	0	0	1	1	0	1	1
hsa-miR-23a	MIMAT0000078	NM_032182	KIAA0157	KIAA0157	0	0	1	0	0	0	1	1	0	1	1
hsa-miR-23a	MIMAT0000078	NM_032499	C15orf41	chromosome 15 open reading frame 41	0	0	1	1	0	0	0	1	0	1	1
hsa-miR-23a	MIMAT0000078	NM_033274	ADAM19	ADAM metallopeptidase domain 19 (meltrin beta)	0	0	0	1	0	0	1	1	0	1	1
hsa-miR-23a	MIMAT0000078	NM_033338	CASP7	caspase 7, apoptosis-related cysteine peptidase	0	0	1	1	0	0	1	1	0	1	0
hsa-miR-23a	MIMAT0000078	NM_033339	CASP7	caspase 7, apoptosis-related cysteine peptidase	0	0	1	1	0	0	1	1	0	1	0
hsa-miR-23a	MIMAT0000078	NM_033340	CASP7	caspase 7, apoptosis-related cysteine peptidase	0	0	0	1	0	0	1	1	0	1	1
hsa-miR-23a	MIMAT0000078	NM_033343	LHX4	LIM homeobox 4	0	0	1	0	0	0	1	1	0	1	1
hsa-miR-23a	MIMAT0000078	NM_033381	COL4A5	collagen, type IV, alpha 5 (Alport syndrome)	0	0	1	1	0	0	1	1	0	1	0
hsa-miR-23a	MIMAT0000078	NM_033656	BRWD1	bromodomain and WD repeat domain containing 1	0	0	1	1	0	0	0	1	0	1	1
hsa-miR-23a	MIMAT0000078	NM_052876	BTBD14B	BTB (POZ) domain containing 14B	0	0	1	0	0	0	1	1	0	1	1
hsa-miR-23a	MIMAT0000078	NM_053053	TADA1L	transcriptional adaptor 1 (HFI1 homolog, yeast)-like	0	0	0	1	0	0	1	1	0	1	1
hsa-miR-23a	MIMAT0000078	NM_058241	CCNT2	cyclin T2	0	0	1	1	0	0	1	1	0	1	0
hsa-miR-23a	MIMAT0000078	NM_080732	EGLN2	egl nine homolog 2 (C. elegans)	0	0	1	0	0	0	1	1	0	1	1
hsa-miR-23a	MIMAT0000078	NM_080792	SIRPA	signal-regulatory protein alpha	0	0	1	1	0	0	1	1	0	1	0
hsa-miR-23a	MIMAT0000078	NM_080836	STK35	serine/threonine kinase 35	0	0	1	0	0	0	1	1	0	1	1
hsa-miR-23a	MIMAT0000078	NM_133330	WHSC1	Wolf-Hirschhorn syndrome candidate 1	0	0	1	1	0	0	1	1	0	1	0
hsa-miR-23a	MIMAT0000078	NM_133331	WHSC1	Wolf-Hirschhorn syndrome candidate 1	0	0	1	1	0	0	1	1	0	1	0
hsa-miR-23a	MIMAT0000078	NM_138459	NUS1	nuclear undecaprenyl pyrophosphate synthase 1 homolog (S. cerevisiae)	0	0	1	1	0	0	0	1	0	1	1
hsa-miR-23a	MIMAT0000078	NM_138494	ZNF655	zinc finger protein 655	0	0	1	1	0	0	1	1	0	1	0
hsa-miR-23a	MIMAT0000078	NM_138576	BCL11B	B-cell CLL/lymphoma 11B (zinc finger protein)	0	0	1	1	0	0	1	1	0	1	0
hsa-miR-23a	MIMAT0000078	NM_138735	NRXN1	neurexin 1	0	0	1	1	0	0	1	1	0	1	0
hsa-miR-23a	MIMAT0000078	NM_144571	CNOT6L	CCR4-NOT transcription complex, subunit 6-like	0	0	1	1	0	0	0	1	0	1	1
hsa-miR-23a	MIMAT0000078	NM_147223	NCOA1	nuclear receptor coactivator 1	0	0	0	1	0	0	1	1	0	1	1
hsa-miR-23a	MIMAT0000078	NM_152227	SNX5	sorting nexin 5	0	0	1	1	0	0	1	1	0	1	0
hsa-miR-23a	MIMAT0000078	NM_152319	C12orf54	chromosome 12 open reading frame 54	0	0	0	1	0	0	1	1	0	1	1
hsa-miR-23a	MIMAT0000078	NM_152600	ZNF579	zinc finger protein 579	0	0	0	1	0	0	1	1	0	1	1
hsa-miR-23a	MIMAT0000078	NM_152871	FAS	Fas (TNF receptor superfamily, member 6)	0	0	1	1	0	0	1	1	0	1	0
hsa-miR-23a	MIMAT0000078	NM_152873	FAS	Fas (TNF receptor superfamily, member 6)	0	0	1	1	0	0	1	1	0	1	0
hsa-miR-23a	MIMAT0000078	NM_152875	FAS	Fas (TNF receptor superfamily, member 6)	0	0	1	1	0	0	1	1	0	1	0
hsa-miR-23a	MIMAT0000078	NM_152876	FAS	Fas (TNF receptor superfamily, member 6)	0	0	1	1	0	0	1	1	0	1	0
hsa-miR-23a	MIMAT0000078	NM_153207	AEBP2	AE binding protein 2	0	0	1	1	0	0	1	1	0	1	0
hsa-miR-23a	MIMAT0000078	NM_153616	SEMA6D	sema domain, transmembrane domain (TM), and cytoplasmic domain, (semaphorin) 6D	0	0	1	1	0	0	1	1	0	1	0
hsa-miR-23a	MIMAT0000078	NM_153618	SEMA6D	sema domain, transmembrane domain (TM), and cytoplasmic domain, (semaphorin) 6D	0	0	1	1	0	0	1	1	0	1	0
hsa-miR-23a	MIMAT0000078	NM_170675	MEIS2	Meis homeobox 2	0	0	0	1	0	0	1	1	0	1	1
hsa-miR-23a	MIMAT0000078	NM_170695	TGIF1	TGFB-induced factor homeobox 1	0	0	1	1	0	0	1	1	0	1	0
hsa-miR-23a	MIMAT0000078	NM_172225	DMBX1	diencephalon/mesencephalon homeobox 1	0	0	1	1	0	0	1	1	0	1	0
hsa-miR-23a	MIMAT0000078	NM_173174	PTK2B	PTK2B protein tyrosine kinase 2 beta	0	0	1	1	0	0	1	1	0	1	0
hsa-miR-23a	MIMAT0000078	NM_173176	PTK2B	PTK2B protein tyrosine kinase 2 beta	0	0	1	1	0	0	1	1	0	1	0
hsa-miR-23a	MIMAT0000078	NM_173209	TGIF1	TGFB-induced factor homeobox 1	0	0	1	1	0	0	1	1	0	1	0
hsa-miR-23a	MIMAT0000078	NM_173211	TGIF1	TGFB-induced factor homeobox 1	0	0	1	1	0	0	1	1	0	1	0
hsa-miR-23a	MIMAT0000078	NM_173560	RFXDC1	regulatory factor X domain containing 1	0	0	0	1	0	0	1	1	0	1	1
hsa-miR-23a	MIMAT0000078	NM_173814	PRTG	protogenin homolog (Gallus gallus)	0	0	1	1	0	0	0	1	0	1	1
hsa-miR-23a	MIMAT0000078	NM_174886	TGIF1	TGFB-induced factor homeobox 1	0	0	1	1	0	0	1	1	0	1	0
hsa-miR-23a	MIMAT0000078	NM_178120	DLX1	distal-less homeobox 1	0	0	1	1	0	0	1	1	0	1	0
hsa-miR-23a	MIMAT0000078	NM_178126	FAM134C	family with sequence similarity 134, member C	0	0	0	1	0	0	1	1	0	1	1
hsa-miR-23a	MIMAT0000078	NM_181723	EFHA2	EF-hand domain family, member A2	0	0	0	1	0	0	1	1	0	1	1
hsa-miR-23a	MIMAT0000078	NM_181839	PKIA	protein kinase (cAMP-dependent, catalytic) inhibitor alpha	0	0	1	1	0	0	1	1	0	1	0
hsa-miR-23a	MIMAT0000078	NM_182797	PLCB4	phospholipase C, beta 4	0	0	1	0	0	0	1	1	0	1	1
hsa-miR-23a	MIMAT0000078	NM_194282	LIN54	lin-54 homolog (C. elegans)	0	0	1	1	0	0	0	1	0	1	1
hsa-miR-23a	MIMAT0000078	NM_194328	RNF38	ring finger protein 38	0	0	1	1	0	0	1	1	0	1	0
hsa-miR-23a	MIMAT0000078	NM_194329	RNF38	ring finger protein 38	0	0	1	1	0	0	1	1	0	1	0
hsa-miR-23a	MIMAT0000078	NM_194330	RNF38	ring finger protein 38	0	0	1	1	0	0	1	1	0	1	0
hsa-miR-23a	MIMAT0000078	NM_194332	RNF38	ring finger protein 38	0	0	1	1	0	0	1	1	0	1	0
hsa-miR-23a	MIMAT0000078	NM_197968	ZMYM2	zinc finger, MYM-type 2	0	0	1	1	0	0	1	1	0	1	0
hsa-miR-23a	MIMAT0000078	NM_198465	NRK	Nik related kinase	0	0	1	0	0	0	1	1	0	1	1
hsa-miR-23a	MIMAT0000078	NM_198513	PHF20L1	PHD finger protein 20-like 1	0	0	1	1	0	0	1	1	0	1	0
hsa-miR-23a	MIMAT0000078	NM_199072	MDFIC	MyoD family inhibitor domain containing	0	0	1	0	0	0	1	1	0	1	1
hsa-miR-23a	MIMAT0000078	NM_199324	OTUD4	OTU domain containing 4	0	0	1	0	0	0	1	1	0	1	1
hsa-miR-23a	MIMAT0000078	NM_199437	PRDM10	PR domain containing 10	0	0	1	1	0	0	1	1	0	1	0
hsa-miR-23a	MIMAT0000078	NM_199438	PRDM10	PR domain containing 10	0	0	1	1	0	0	1	1	0	1	0
hsa-miR-23a	MIMAT0000078	NM_199439	PRDM10	PR domain containing 10	0	0	1	1	0	0	1	1	0	1	0
hsa-miR-23a	MIMAT0000078	NM_201999	ELF2	E74-like factor 2 (ets domain transcription factor)	0	0	1	1	0	0	1	1	0	1	0
hsa-miR-23a	MIMAT0000078	NM_203301	FBXO33	F-box protein 33	0	0	1	1	0	0	1	1	0	1	0
hsa-miR-23a	MIMAT0000078	NM_203504	G3BP2	GTPase activating protein (SH3 domain) binding protein 2	0	0	1	1	0	0	1	1	0	1	0
hsa-miR-23a	MIMAT0000078	NM_206876	PPP1CB	protein phosphatase 1, catalytic subunit, beta isoform	0	0	1	1	0	0	1	1	0	1	0
hsa-miR-23a	MIMAT0000078	NM_207292	MBNL1	muscleblind-like (Drosophila)	0	0	1	1	0	0	1	1	0	1	0
hsa-miR-23a	MIMAT0000078	NM_207293	MBNL1	muscleblind-like (Drosophila)	0	0	1	1	0	0	1	1	0	1	0
hsa-miR-23a	MIMAT0000078	NM_207294	MBNL1	muscleblind-like (Drosophila)	0	0	1	1	0	0	1	1	0	1	0
hsa-miR-23a	MIMAT0000078	NM_207295	MBNL1	muscleblind-like (Drosophila)	0	0	1	1	0	0	1	1	0	1	0
hsa-miR-23a	MIMAT0000078	NM_207296	MBNL1	muscleblind-like (Drosophila)	0	0	1	1	0	0	1	1	0	1	0
hsa-miR-23a	MIMAT0000078	NM_000043	FAS	Fas (TNF receptor superfamily, member 6)	0	0	0	1	0	0	1	1	0	1	0
hsa-miR-23a	MIMAT0000078	NM_000045	ARG1	arginase, liver	0	0	1	1	0	0	0	1	0	1	0
hsa-miR-23a	MIMAT0000078	NM_000097	CPOX	coproporphyrinogen oxidase	0	0	1	1	0	0	0	1	0	1	0
hsa-miR-23a	MIMAT0000078	NM_000192	TBX5	T-box 5	0	0	1	1	0	0	0	1	0	1	0
hsa-miR-23a	MIMAT0000078	NM_000216	KAL1	Kallmann syndrome 1 sequence	0	0	1	1	0	0	0	1	0	1	0
hsa-miR-23a	MIMAT0000078	NM_000245	MET	met proto-oncogene (hepatocyte growth factor receptor)	0	0	0	0	0	0	1	1	0	1	1
hsa-miR-23a	MIMAT0000078	NM_000252	MTM1	myotubularin 1	0	0	1	1	0	0	0	1	0	1	0
hsa-miR-23a	MIMAT0000078	NM_000314	PTEN	phosphatase and tensin homolog (mutated in multiple advanced cancers 1)	0	0	1	0	0	0	0	1	0	1	1
hsa-miR-23a	MIMAT0000078	NM_000322	PRPH2	peripherin 2 (retinal degeneration, slow)	0	0	1	1	0	0	0	1	0	1	0
hsa-miR-23a	MIMAT0000078	NM_000396	CTSK	cathepsin K	0	0	1	1	0	0	0	1	0	1	0
hsa-miR-23a	MIMAT0000078	NM_000406	GNRHR	gonadotropin-releasing hormone receptor	0	0	1	1	0	0	0	1	0	1	0
hsa-miR-23a	MIMAT0000078	NM_000412	HRG	histidine-rich glycoprotein	0	0	1	1	0	0	0	1	0	1	0
hsa-miR-23a	MIMAT0000078	NM_000495	COL4A5	collagen, type IV, alpha 5 (Alport syndrome)	0	0	0	1	0	0	1	1	0	1	0
hsa-miR-23a	MIMAT0000078	NM_000633	BCL2	B-cell CLL/lymphoma 2	0	0	1	1	0	0	0	1	0	1	0
hsa-miR-23a	MIMAT0000078	NM_000745	CHRNA5	cholinergic receptor, nicotinic, alpha 5	0	0	1	1	0	0	0	1	0	1	0
hsa-miR-23a	MIMAT0000078	NM_000814	GABRB3	gamma-aminobutyric acid (GABA) A receptor, beta 3	0	0	1	0	0	0	0	1	0	1	1
hsa-miR-23a	MIMAT0000078	NM_000899	KITLG	KIT ligand	0	0	1	0	0	0	0	1	0	1	1
hsa-miR-23a	MIMAT0000078	NM_000950	PRRG1	proline rich Gla (G-carboxyglutamic acid) 1	0	0	1	1	0	0	0	1	0	1	0
hsa-miR-23a	MIMAT0000078	NM_001001323	ATP2B1	ATPase, Ca++ transporting, plasma membrane 1	0	0	1	0	0	0	1	1	0	1	0
hsa-miR-23a	MIMAT0000078	NM_001001556	GALK2	galactokinase 2	0	0	1	1	0	0	0	1	0	1	0
hsa-miR-23a	MIMAT0000078	NM_001001713	SH3BGR	SH3 domain binding glutamic acid-rich protein	0	0	0	1	0	0	0	1	0	1	1
hsa-miR-23a	MIMAT0000078	NM_001002838	WNK3	WNK lysine deficient protein kinase 3	0	0	0	0	0	0	1	1	0	1	1
hsa-miR-23a	MIMAT0000078	NM_001002844	ZNF280D	zinc finger protein 280D	0	0	1	1	0	0	0	1	0	1	0
hsa-miR-23a	MIMAT0000078	NM_001002860	BTBD7	BTB (POZ) domain containing 7	0	0	0	1	0	0	0	1	0	1	1
hsa-miR-23a	MIMAT0000078	NM_001003800	BICD2	bicaudal D homolog 2 (Drosophila)	0	0	1	1	0	0	0	1	0	1	0
hsa-miR-23a	MIMAT0000078	NM_001004301	ZNF813	zinc finger protein 813	0	0	1	1	0	0	0	1	0	1	0
hsa-miR-23a	MIMAT0000078	NM_001004317	LIN28B	lin-28 homolog B (C. elegans)	0	0	0	0	0	0	1	1	0	1	1
hsa-miR-23a	MIMAT0000078	NM_001005242	PKP2	plakophilin 2	0	0	1	1	0	0	0	1	0	1	0
hsa-miR-23a	MIMAT0000078	NM_001005267	C15orf21	chromosome 15 open reading frame 21	0	0	0	1	0	0	1	1	0	1	0
hsa-miR-23a	MIMAT0000078	NM_001005269	C15orf21	chromosome 15 open reading frame 21	0	0	0	1	0	0	1	1	0	1	0
hsa-miR-23a	MIMAT0000078	NM_001005354	PRR13	proline rich 13	0	0	1	1	0	0	0	1	0	1	0
hsa-miR-23a	MIMAT0000078	NM_001007094	ZNF37A	zinc finger protein 37A	0	0	1	1	0	0	0	1	0	1	0
hsa-miR-23a	MIMAT0000078	NM_001008224	UACA	uveal autoantigen with coiled-coil domains and ankyrin repeats	0	0	1	1	0	0	0	1	0	1	0
hsa-miR-23a	MIMAT0000078	NM_001008390	CGGBP1	CGG triplet repeat binding protein 1	0	0	1	1	0	0	0	1	0	1	0
hsa-miR-23a	MIMAT0000078	NM_001008495	TMEM64	transmembrane protein 64	0	0	1	0	0	0	0	1	0	1	1
hsa-miR-23a	MIMAT0000078	NM_001008801	ZNF468	zinc finger protein 468	0	0	1	1	0	0	0	1	0	1	0
hsa-miR-23a	MIMAT0000078	NM_001008925	RCHY1	ring finger and CHY zinc finger domain containing 1	0	0	1	1	0	0	0	1	0	1	0
hsa-miR-23a	MIMAT0000078	NM_001009922	RCHY1	ring finger and CHY zinc finger domain containing 1	0	0	1	1	0	0	0	1	0	1	0
hsa-miR-23a	MIMAT0000078	NM_001009960	ZNF655	zinc finger protein 655	0	0	1	1	0	0	0	1	0	1	0
hsa-miR-23a	MIMAT0000078	NM_001009993	FAM168B	family with sequence similarity 168, member B	0	0	1	1	0	0	0	1	0	1	0
hsa-miR-23a	MIMAT0000078	NM_001010854	TTC7B	tetratricopeptide repeat domain 7B	0	0	0	1	0	0	0	1	0	1	1
hsa-miR-23a	MIMAT0000078	NM_001010908	C1QL3	complement component 1, q subcomponent-like 3	0	0	1	0	0	0	0	1	0	1	1
hsa-miR-23a	MIMAT0000078	NM_001010938	TNK2	tyrosine kinase, non-receptor, 2	0	0	1	0	0	0	0	1	0	1	1
hsa-miR-23a	MIMAT0000078	NM_001011513	PDLIM5	PDZ and LIM domain 5	0	0	1	1	0	0	0	1	0	1	0
hsa-miR-23a	MIMAT0000078	NM_001011658	TRAPPC2	trafficking protein particle complex 2	0	0	1	1	0	0	0	1	0	1	0
hsa-miR-23a	MIMAT0000078	NM_001012412	SGOL1	shugoshin-like 1 (S. pombe)	0	0	1	1	0	0	0	1	0	1	0
hsa-miR-23a	MIMAT0000078	NM_001012763	GNRHR	gonadotropin-releasing hormone receptor	0	0	1	1	0	0	0	1	0	1	0
hsa-miR-23a	MIMAT0000078	NM_001013437	SEH1L	SEH1-like (S. cerevisiae)	0	0	1	1	0	0	0	1	0	1	0
hsa-miR-23a	MIMAT0000078	NM_001013717	LOC441108	hypothetical gene supported by AK128882	0	0	1	1	0	0	0	1	0	1	0
hsa-miR-23a	MIMAT0000078	NM_001013746	ZNF107	zinc finger protein 107	0	0	1	1	0	0	0	1	0	1	0
hsa-miR-23a	MIMAT0000078	NM_001014797	KCNMA1	potassium large conductance calcium-activated channel, subfamily M, alpha member 1	0	0	1	1	0	0	0	1	0	1	0
hsa-miR-23a	MIMAT0000078	NM_001015051	RUNX2	runt-related transcription factor 2	0	0	1	0	0	0	0	1	0	1	1
hsa-miR-23a	MIMAT0000078	NM_001017408	GOPC	golgi associated PDZ and coiled-coil motif containing	0	0	0	1	0	0	0	1	0	1	1
hsa-miR-23a	MIMAT0000078	NM_001017926	ZHX1	zinc fingers and homeoboxes 1	0	0	1	1	0	0	0	1	0	1	0
hsa-miR-23a	MIMAT0000078	NM_001017970	TMEM30B	transmembrane protein 30B	0	0	1	1	0	0	0	1	0	1	0
hsa-miR-23a	MIMAT0000078	NM_001018055	BRCC3	BRCA1/BRCA2-containing complex, subunit 3	0	0	1	1	0	0	0	1	0	1	0
hsa-miR-23a	MIMAT0000078	NM_001018058	TFEC	transcription factor EC	0	0	1	1	0	0	0	1	0	1	0
hsa-miR-23a	MIMAT0000078	NM_001018091	Gcom1	GRINL1A combined protein	0	0	1	0	0	0	0	1	0	1	1
hsa-miR-23a	MIMAT0000078	NM_001018102	GRINL1A	glutamate receptor, ionotropic, N-methyl D-aspartate-like 1A	0	0	1	0	0	0	0	1	0	1	1
hsa-miR-23a	MIMAT0000078	NM_001018161	PON2	paraoxonase 2	0	0	1	1	0	0	0	1	0	1	0
hsa-miR-23a	MIMAT0000078	NM_001023567	GOLGA8B	golgi autoantigen, golgin subfamily a, 8B	0	0	1	1	0	0	0	1	0	1	0
hsa-miR-23a	MIMAT0000078	NM_001024647	RAB3IP	RAB3A interacting protein (rabin3)	0	0	1	1	0	0	0	1	0	1	0
hsa-miR-23a	MIMAT0000078	NM_001024924	EXOC1	exocyst complex component 1	0	0	1	1	0	0	0	1	0	1	0
hsa-miR-23a	MIMAT0000078	NM_001025076	CUGBP2	CUG triplet repeat, RNA binding protein 2	0	0	1	1	0	0	0	1	0	1	0
hsa-miR-23a	MIMAT0000078	NM_001025593	ARFIP1	ADP-ribosylation factor interacting protein 1 (arfaptin 1)	0	0	0	1	0	0	0	1	0	1	1
hsa-miR-23a	MIMAT0000078	NM_001025595	ARFIP1	ADP-ribosylation factor interacting protein 1 (arfaptin 1)	0	0	1	1	0	0	0	1	0	1	0
hsa-miR-23a	MIMAT0000078	NM_001025778	VRK3	vaccinia related kinase 3	0	0	1	0	0	0	0	1	0	1	1
hsa-miR-23a	MIMAT0000078	NM_001029839	C3orf23	chromosome 3 open reading frame 23	0	0	1	1	0	0	0	1	0	1	0
hsa-miR-23a	MIMAT0000078	NM_001029840	C3orf23	chromosome 3 open reading frame 23	0	0	1	1	0	0	0	1	0	1	0
hsa-miR-23a	MIMAT0000078	NM_001031710	KLHL7	kelch-like 7 (Drosophila)	0	0	1	1	0	0	0	1	0	1	0
hsa-miR-23a	MIMAT0000078	NM_001031804	MAF	v-maf musculoaponeurotic fibrosarcoma oncogene homolog (avian)	0	0	0	1	0	0	0	1	0	1	1
hsa-miR-23a	MIMAT0000078	NM_001032284	TMPO	thymopoietin	0	0	1	1	0	0	0	1	0	1	0
hsa-miR-23a	MIMAT0000078	NM_001032396	PJA1	praja 1	0	0	1	1	0	0	0	1	0	1	0
hsa-miR-23a	MIMAT0000078	NM_001032999	CBFA2T2	core-binding factor, runt domain, alpha subunit 2; translocated to, 2	0	0	1	0	0	0	0	1	0	1	1
hsa-miR-23a	MIMAT0000078	NM_001033045	GPR155	G protein-coupled receptor 155	0	0	1	1	0	0	0	1	0	1	0
hsa-miR-23a	MIMAT0000078	NM_001034915	RBM35A	RNA binding motif protein 35A	0	0	0	1	0	0	0	1	0	1	1
hsa-miR-23a	MIMAT0000078	NM_001035	RYR2	ryanodine receptor 2 (cardiac)	0	0	1	1	0	0	0	1	0	1	0
hsa-miR-23a	MIMAT0000078	NM_001035003	KCNIP4	Kv channel interacting protein 4	0	0	1	1	0	0	0	1	0	1	0
hsa-miR-23a	MIMAT0000078	NM_001035004	KCNIP4	Kv channel interacting protein 4	0	0	1	1	0	0	0	1	0	1	0
hsa-miR-23a	MIMAT0000078	NM_001037165	FOXK1	forkhead box K1	0	0	1	0	0	0	0	1	0	1	1
hsa-miR-23a	MIMAT0000078	NM_001037317	PAP2D	phosphatidic acid phosphatase type 2	0	0	1	1	0	0	0	1	0	1	0
hsa-miR-23a	MIMAT0000078	NM_001037335	PRIC285	peroxisomal proliferator-activated receptor A interacting complex 285	0	0	1	1	0	0	0	1	0	1	0
hsa-miR-23a	MIMAT0000078	NM_001037339	PDE4B	phosphodiesterase 4B, cAMP-specific (phosphodiesterase E4 dunce homolog, Drosophila)	0	0	0	1	0	0	0	1	0	1	1
hsa-miR-23a	MIMAT0000078	NM_001037340	PDE4B	phosphodiesterase 4B, cAMP-specific (phosphodiesterase E4 dunce homolog, Drosophila)	0	0	1	1	0	0	0	1	0	1	0
hsa-miR-23a	MIMAT0000078	NM_001037341	PDE4B	phosphodiesterase 4B, cAMP-specific (phosphodiesterase E4 dunce homolog, Drosophila)	0	0	1	1	0	0	0	1	0	1	0
hsa-miR-23a	MIMAT0000078	NM_001038493	DLX1	distal-less homeobox 1	0	0	0	1	0	0	0	1	0	1	1
hsa-miR-23a	MIMAT0000078	NM_001039366	ATP6V1E1	ATPase, H+ transporting, lysosomal 31kDa, V1 subunit E1	0	0	0	1	0	0	0	1	0	1	1
hsa-miR-23a	MIMAT0000078	NM_001039367	ATP6V1E1	ATPase, H+ transporting, lysosomal 31kDa, V1 subunit E1	0	0	1	1	0	0	0	1	0	1	0
hsa-miR-23a	MIMAT0000078	NM_001039535	C18orf24	chromosome 18 open reading frame 24	0	0	1	1	0	0	0	1	0	1	0
hsa-miR-23a	MIMAT0000078	NM_001039538	MAP2	microtubule-associated protein 2	0	0	1	0	0	0	0	1	0	1	1
hsa-miR-23a	MIMAT0000078	NM_001039573	SEC14L1	SEC14-like 1 (S. cerevisiae)	0	0	0	1	0	0	0	1	0	1	1
hsa-miR-23a	MIMAT0000078	NM_001039585	PTGFR	prostaglandin F receptor (FP)	0	0	1	0	0	0	0	1	0	1	1
hsa-miR-23a	MIMAT0000078	NM_001039656	MTL5	metallothionein-like 5, testis-specific (tesmin)	0	0	1	1	0	0	0	1	0	1	0
hsa-miR-23a	MIMAT0000078	NM_001040023	SIRPA	signal-regulatory protein alpha	0	0	1	1	0	0	0	1	0	1	0
hsa-miR-23a	MIMAT0000078	NM_001040185	ZNF765	zinc finger protein 765	0	0	1	1	0	0	0	1	0	1	0
hsa-miR-23a	MIMAT0000078	NM_001040429	PCDH17	protocadherin 17	0	0	1	1	0	0	0	1	0	1	0
hsa-miR-23a	MIMAT0000078	NM_001040665	STEAP2	six transmembrane epithelial antigen of the prostate 2	0	0	1	1	0	0	0	1	0	1	0
hsa-miR-23a	MIMAT0000078	NM_001042400	CEP63	centrosomal protein 63kDa	0	0	1	1	0	0	0	1	0	1	0
hsa-miR-23a	MIMAT0000078	NM_001042424	WHSC1	Wolf-Hirschhorn syndrome candidate 1	0	0	1	1	0	0	0	1	0	1	0
hsa-miR-23a	MIMAT0000078	NM_001042450	SLC5A10	solute carrier family 5 (sodium/glucose cotransporter), member 10	0	0	1	1	0	0	0	1	0	1	0
hsa-miR-23a	MIMAT0000078	NM_001042604	XRN1	5"-3" exoribonuclease 1	0	0	1	1	0	0	0	1	0	1	0
hsa-miR-23a	MIMAT0000078	NM_001044722	CSNK1G3	casein kinase 1, gamma 3	0	0	1	1	0	0	0	1	0	1	0
hsa-miR-23a	MIMAT0000078	NM_001044723	CSNK1G3	casein kinase 1, gamma 3	0	0	1	1	0	0	0	1	0	1	0
hsa-miR-23a	MIMAT0000078	NM_001068	TOP2B	topoisomerase (DNA) II beta 180kDa	0	0	0	0	0	0	1	1	0	1	1
hsa-miR-23a	MIMAT0000078	NM_001076675	ZNF626	zinc finger protein 626	0	0	1	1	0	0	0	1	0	1	0
hsa-miR-23a	MIMAT0000078	NM_001076678	ZNF493	zinc finger protein 493	0	0	1	1	0	0	0	1	0	1	0
hsa-miR-23a	MIMAT0000078	NM_001076786	QSER1	glutamine and serine rich 1	0	0	1	1	0	0	0	1	0	1	0
hsa-miR-23a	MIMAT0000078	NM_001077484	SLC38A1	solute carrier family 38, member 1	0	0	0	1	0	0	0	1	0	1	1
hsa-miR-23a	MIMAT0000078	NM_001077498	C17orf63	chromosome 17 open reading frame 63	0	0	1	0	0	0	0	1	0	1	1
hsa-miR-23a	MIMAT0000078	NM_001078166	SFRS1	splicing factor, arginine/serine-rich 1 (splicing factor 2, alternate splicing factor)	0	0	1	1	0	0	0	1	0	1	0
hsa-miR-23a	MIMAT0000078	NM_001079526	IKZF2	IKAROS family zinc finger 2 (Helios)	0	0	1	1	0	0	0	1	0	1	0
hsa-miR-23a	MIMAT0000078	NM_001079537	TRAPPC6B	trafficking protein particle complex 6B	0	0	1	1	0	0	0	1	0	1	0
hsa-miR-23a	MIMAT0000078	NM_001079668	NKX2-1	NK2 homeobox 1	0	0	0	1	0	0	0	1	0	1	1
hsa-miR-23a	MIMAT0000078	NM_001079858	GPR64	G protein-coupled receptor 64	0	0	1	1	0	0	0	1	0	1	0
hsa-miR-23a	MIMAT0000078	NM_001079859	GPR64	G protein-coupled receptor 64	0	0	0	1	0	0	0	1	0	1	1
hsa-miR-23a	MIMAT0000078	NM_001079860	GPR64	G protein-coupled receptor 64	0	0	1	1	0	0	0	1	0	1	0
hsa-miR-23a	MIMAT0000078	NM_001080467	MYO5B	myosin VB	0	0	1	1	0	0	0	1	0	1	0
hsa-miR-23a	MIMAT0000078	NM_001080951	PLAGL1	pleiomorphic adenoma gene-like 1	0	0	1	0	0	0	0	1	0	1	1
hsa-miR-23a	MIMAT0000078	NM_001106	ACVR2B	activin A receptor, type IIB	0	0	1	0	0	0	0	1	0	1	1
hsa-miR-23a	MIMAT0000078	NM_001160	APAF1	apoptotic peptidase activating factor 1	0	0	1	1	0	0	0	1	0	1	0
hsa-miR-23a	MIMAT0000078	NM_001167	XIAP	X-linked inhibitor of apoptosis	0	0	1	0	0	0	0	1	0	1	1
hsa-miR-23a	MIMAT0000078	NM_001304	CPD	carboxypeptidase D	0	0	1	0	0	0	0	1	0	1	1
hsa-miR-23a	MIMAT0000078	NM_001316	CSE1L	CSE1 chromosome segregation 1-like (yeast)	0	0	1	1	0	0	0	1	0	1	0
hsa-miR-23a	MIMAT0000078	NM_001421	ELF4	E74-like factor 4 (ets domain transcription factor)	0	0	1	0	0	0	0	1	0	1	1
hsa-miR-23a	MIMAT0000078	NM_001430	EPAS1	endothelial PAS domain protein 1	0	0	0	1	0	0	0	1	0	1	1
hsa-miR-23a	MIMAT0000078	NM_001465	FYB	FYN binding protein (FYB-120/130)	0	0	1	1	0	0	0	1	0	1	0
hsa-miR-23a	MIMAT0000078	NM_001483	GBAS	glioblastoma amplified sequence	0	0	0	0	0	0	1	1	0	1	1
hsa-miR-23a	MIMAT0000078	NM_001489	NR6A1	nuclear receptor subfamily 6, group A, member 1	0	0	0	0	0	0	1	1	0	1	1
hsa-miR-23a	MIMAT0000078	NM_001547	IFIT2	interferon-induced protein with tetratricopeptide repeats 2	0	0	1	1	0	0	0	1	0	1	0
hsa-miR-23a	MIMAT0000078	NM_001584	MPPED2	metallophosphoesterase domain containing 2	0	0	0	0	0	0	1	1	0	1	1
hsa-miR-23a	MIMAT0000078	NM_001619	ADRBK1	adrenergic, beta, receptor kinase 1	0	0	1	0	0	0	0	1	0	1	1
hsa-miR-23a	MIMAT0000078	NM_001649	SHROOM2	shroom family member 2	0	0	1	1	0	0	0	1	0	1	0
hsa-miR-23a	MIMAT0000078	NM_001663	ARF6	ADP-ribosylation factor 6	0	0	0	0	0	0	1	1	0	1	1
hsa-miR-23a	MIMAT0000078	NM_001695	ATP6V1C1	ATPase, H+ transporting, lysosomal 42kDa, V1 subunit C1	0	0	1	1	0	0	0	1	0	1	0
hsa-miR-23a	MIMAT0000078	NM_001896	CSNK2A2	casein kinase 2, alpha prime polypeptide	0	0	0	0	0	0	1	1	0	1	1
hsa-miR-23a	MIMAT0000078	NM_001969	EIF5	eukaryotic translation initiation factor 5	0	0	1	1	0	0	0	1	0	1	0
hsa-miR-23a	MIMAT0000078	NM_002006	FGF2	fibroblast growth factor 2 (basic)	0	0	1	1	0	0	0	1	0	1	0
hsa-miR-23a	MIMAT0000078	NM_002024	FMR1	fragile X mental retardation 1	0	0	0	0	0	0	1	1	0	1	1
hsa-miR-23a	MIMAT0000078	NM_002031	FRK	fyn-related kinase	0	0	1	1	0	0	0	1	0	1	0
hsa-miR-23a	MIMAT0000078	NM_002044	GALK2	galactokinase 2	0	0	1	1	0	0	0	1	0	1	0
hsa-miR-23a	MIMAT0000078	NM_002129	HMGB2	high-mobility group box 2	0	0	0	1	0	0	0	1	0	1	1
hsa-miR-23a	MIMAT0000078	NM_002181	IHH	Indian hedgehog homolog (Drosophila)	0	0	1	0	0	0	0	1	0	1	1
hsa-miR-23a	MIMAT0000078	NM_002197	ACO1	aconitase 1, soluble	0	0	1	1	0	0	0	1	0	1	0
hsa-miR-23a	MIMAT0000078	NM_002198	IRF1	interferon regulatory factor 1	0	0	0	0	0	0	1	1	0	1	1
hsa-miR-23a	MIMAT0000078	NM_002209	ITGAL	integrin, alpha L (antigen CD11A (p180), lymphocyte function-associated antigen 1; alpha polypeptide)	0	0	1	1	0	0	0	1	0	1	0
hsa-miR-23a	MIMAT0000078	NM_002214	ITGB8	integrin, beta 8	0	0	0	1	0	0	0	1	0	1	1
hsa-miR-23a	MIMAT0000078	NM_002356	MARCKS	myristoylated alanine-rich protein kinase C substrate	0	0	0	0	0	0	1	1	0	1	1
hsa-miR-23a	MIMAT0000078	NM_002379	MATN1	matrilin 1, cartilage matrix protein	0	0	1	1	0	0	0	1	0	1	0
hsa-miR-23a	MIMAT0000078	NM_002398	MEIS1	Meis homeobox 1	0	0	0	1	0	0	1	1	0	1	0
hsa-miR-23a	MIMAT0000078	NM_002399	MEIS2	Meis homeobox 2	0	0	0	1	0	0	1	1	0	1	0
hsa-miR-23a	MIMAT0000078	NM_002442	MSI1	musashi homolog 1 (Drosophila)	0	0	1	0	0	0	0	1	0	1	1
hsa-miR-23a	MIMAT0000078	NM_002577	PAK2	p21 protein (Cdc42/Rac)-activated kinase 2	0	0	1	1	0	0	0	1	0	1	0
hsa-miR-23a	MIMAT0000078	NM_002600	PDE4B	phosphodiesterase 4B, cAMP-specific (phosphodiesterase E4 dunce homolog, Drosophila)	0	0	1	1	0	0	0	1	0	1	0
hsa-miR-23a	MIMAT0000078	NM_002612	PDK4	pyruvate dehydrogenase kinase, isozyme 4	0	0	1	1	0	0	0	1	0	1	0
hsa-miR-23a	MIMAT0000078	NM_002656	PLAGL1	pleiomorphic adenoma gene-like 1	0	0	1	0	0	0	1	1	0	1	0
hsa-miR-23a	MIMAT0000078	NM_002764	PRPS1	phosphoribosyl pyrophosphate synthetase 1	0	0	1	0	0	0	0	1	0	1	1
hsa-miR-23a	MIMAT0000078	NM_002853	RAD1	RAD1 homolog (S. pombe)	0	0	1	1	0	0	0	1	0	1	0
hsa-miR-23a	MIMAT0000078	NM_002919	RFX3	regulatory factor X, 3 (influences HLA class II expression)	0	0	1	1	0	0	0	1	0	1	0
hsa-miR-23a	MIMAT0000078	NM_002927	RGS13	regulator of G-protein signaling 13	0	0	1	1	0	0	0	1	0	1	0
hsa-miR-23a	MIMAT0000078	NM_002998	SDC2	syndecan 2	0	0	1	0	0	0	1	1	0	1	0
hsa-miR-23a	MIMAT0000078	NM_003020	SCG5	secretogranin V (7B2 protein)	0	0	1	1	0	0	0	1	0	1	0
hsa-miR-23a	MIMAT0000078	NM_003037	SLAMF1	signaling lymphocytic activation molecule family member 1	0	0	1	1	0	0	0	1	0	1	0
hsa-miR-23a	MIMAT0000078	NM_003045	SLC7A1	solute carrier family 7 (cationic amino acid transporter, y+ system), member 1	0	0	0	0	0	0	1	1	0	1	1
hsa-miR-23a	MIMAT0000078	NM_003081	SNAP25	synaptosomal-associated protein, 25kDa	0	0	1	0	0	0	1	1	0	1	0
hsa-miR-23a	MIMAT0000078	NM_003094	SNRPE	small nuclear ribonucleoprotein polypeptide E	0	0	1	1	0	0	0	1	0	1	0
hsa-miR-23a	MIMAT0000078	NM_003108	SOX11	SRY (sex determining region Y)-box 11	0	0	1	0	0	0	0	1	0	1	1
hsa-miR-23a	MIMAT0000078	NM_003216	TEF	thyrotrophic embryonic factor	0	0	1	0	0	0	1	1	0	1	0
hsa-miR-23a	MIMAT0000078	NM_003330	TXNRD1	thioredoxin reductase 1	0	0	1	1	0	0	0	1	0	1	0
hsa-miR-23a	MIMAT0000078	NM_003340	UBE2D3	ubiquitin-conjugating enzyme E2D 3 (UBC4/5 homolog, yeast)	0	0	0	1	0	0	0	1	0	1	1
hsa-miR-23a	MIMAT0000078	NM_003350	UBE2V2	ubiquitin-conjugating enzyme E2 variant 2	0	0	0	1	0	0	1	1	0	1	0
hsa-miR-23a	MIMAT0000078	NM_003385	VSNL1	visinin-like 1	0	0	1	0	0	0	0	1	0	1	1
hsa-miR-23a	MIMAT0000078	NM_003421	ZNF37A	zinc finger protein 37A	0	0	1	1	0	0	0	1	0	1	0
hsa-miR-23a	MIMAT0000078	NM_003429	ZNF85	zinc finger protein 85	0	0	1	1	0	0	0	1	0	1	0
hsa-miR-23a	MIMAT0000078	NM_003430	ZNF91	zinc finger protein 91	0	0	1	1	0	0	0	1	0	1	0
hsa-miR-23a	MIMAT0000078	NM_003437	ZNF136	zinc finger protein 136	0	0	1	1	0	0	0	1	0	1	0
hsa-miR-23a	MIMAT0000078	NM_003468	FZD5	frizzled homolog 5 (Drosophila)	0	0	0	1	0	0	0	1	0	1	1
hsa-miR-23a	MIMAT0000078	NM_003471	KCNAB1	potassium voltage-gated channel, shaker-related subfamily, beta member 1	0	0	1	1	0	0	0	1	0	1	0
hsa-miR-23a	MIMAT0000078	NM_003480	MFAP5	microfibrillar associated protein 5	0	0	1	1	0	0	0	1	0	1	0
hsa-miR-23a	MIMAT0000078	NM_003482	MLL2	myeloid/lymphoid or mixed-lineage leukemia 2	0	0	1	0	0	0	0	1	0	1	1
hsa-miR-23a	MIMAT0000078	NM_003507	FZD7	frizzled homolog 7 (Drosophila)	0	0	1	0	0	0	0	1	0	1	1
hsa-miR-23a	MIMAT0000078	NM_003566	EEA1	early endosome antigen 1	0	0	1	0	0	0	0	1	0	1	1
hsa-miR-23a	MIMAT0000078	NM_003574	VAPA	VAMP (vesicle-associated membrane protein)-associated protein A, 33kDa	0	0	0	1	0	0	0	1	0	1	1
hsa-miR-23a	MIMAT0000078	NM_003628	PKP4	plakophilin 4	0	0	0	1	0	0	1	1	0	1	0
hsa-miR-23a	MIMAT0000078	NM_003633	ENC1	ectodermal-neural cortex (with BTB-like domain)	0	0	1	0	0	0	0	1	0	1	1
hsa-miR-23a	MIMAT0000078	NM_003715	USO1	USO1 homolog, vesicle docking protein (yeast)	0	0	1	1	0	0	0	1	0	1	0
hsa-miR-23a	MIMAT0000078	NM_003885	CDK5R1	cyclin-dependent kinase 5, regulatory subunit 1 (p35)	0	0	0	0	0	0	1	1	0	1	1
hsa-miR-23a	MIMAT0000078	NM_003948	CDKL2	cyclin-dependent kinase-like 2 (CDC2-related kinase)	0	0	1	1	0	0	0	1	0	1	0
hsa-miR-23a	MIMAT0000078	NM_003992	CLK3	CDC-like kinase 3	0	0	1	0	0	0	1	1	0	1	0
hsa-miR-23a	MIMAT0000078	NM_004225	MFHAS1	malignant fibrous histiocytoma amplified sequence 1	0	0	0	1	0	0	0	1	0	1	1
hsa-miR-23a	MIMAT0000078	NM_004241	JMJD1C	jumonji domain containing 1C	0	0	1	0	0	0	0	1	0	1	1
hsa-miR-23a	MIMAT0000078	NM_004330	BNIP2	BCL2/adenovirus E1B 19kDa interacting protein 2	0	0	1	1	0	0	0	1	0	1	0
hsa-miR-23a	MIMAT0000078	NM_004331	BNIP3L	BCL2/adenovirus E1B 19kDa interacting protein 3-like	0	0	0	0	0	0	1	1	0	1	1
hsa-miR-23a	MIMAT0000078	NM_004349	RUNX1T1	runt-related transcription factor 1; translocated to, 1 (cyclin D-related)	0	0	0	0	0	0	1	1	0	1	1
hsa-miR-23a	MIMAT0000078	NM_004496	FOXA1	forkhead box A1	0	0	1	0	0	0	1	1	0	1	0
hsa-miR-23a	MIMAT0000078	NM_004595	SMS	spermine synthase	0	0	0	1	0	0	0	1	0	1	1
hsa-miR-23a	MIMAT0000078	NM_004598	SPOCK1	sparc/osteonectin, cwcv and kazal-like domains proteoglycan (testican) 1	0	0	1	0	0	0	0	1	0	1	1
hsa-miR-23a	MIMAT0000078	NM_004627	WRB	tryptophan rich basic protein	0	0	1	1	0	0	0	1	0	1	0
hsa-miR-23a	MIMAT0000078	NM_004661	CDC23	cell division cycle 23 homolog (S. cerevisiae)	0	0	1	1	0	0	0	1	0	1	0
hsa-miR-23a	MIMAT0000078	NM_004705	PRKRIR	protein-kinase, interferon-inducible double stranded RNA dependent inhibitor, repressor of (P58 repressor)	0	0	0	1	0	0	0	1	0	1	1
hsa-miR-23a	MIMAT0000078	NM_004744	LRAT	lecithin retinol acyltransferase (phosphatidylcholine--retinol O-acyltransferase)	0	0	1	1	0	0	0	1	0	1	0
hsa-miR-23a	MIMAT0000078	NM_004776	B4GALT5	UDP-Gal:betaGlcNAc beta 1,4- galactosyltransferase, polypeptide 5	0	0	1	1	0	0	0	1	0	1	0
hsa-miR-23a	MIMAT0000078	NM_004779	CNOT8	CCR4-NOT transcription complex, subunit 8	0	0	1	1	0	0	0	1	0	1	0
hsa-miR-23a	MIMAT0000078	NM_004852	ONECUT2	one cut homeobox 2	0	0	1	1	0	0	0	1	0	1	0
hsa-miR-23a	MIMAT0000078	NM_004906	WTAP	Wilms tumor 1 associated protein	0	0	0	1	0	0	1	1	0	1	0
hsa-miR-23a	MIMAT0000078	NM_004956	ETV1	ets variant gene 1	0	0	1	0	0	0	0	1	0	1	1
hsa-miR-23a	MIMAT0000078	NM_005000	NDUFA5	NADH dehydrogenase (ubiquinone) 1 alpha subcomplex, 5, 13kDa	0	0	1	1	0	0	0	1	0	1	0
hsa-miR-23a	MIMAT0000078	NM_005093	CBFA2T2	core-binding factor, runt domain, alpha subunit 2; translocated to, 2	0	0	1	0	0	0	1	1	0	1	0
hsa-miR-23a	MIMAT0000078	NM_005127	CLEC2B	C-type lectin domain family 2, member B	0	0	0	1	0	0	1	1	0	1	0
hsa-miR-23a	MIMAT0000078	NM_005156	ROD1	ROD1 regulator of differentiation 1 (S. pombe)	0	0	1	1	0	0	0	1	0	1	0
hsa-miR-23a	MIMAT0000078	NM_005187	CBFA2T3	core-binding factor, runt domain, alpha subunit 2; translocated to, 3	0	0	0	0	0	0	1	1	0	1	1
hsa-miR-23a	MIMAT0000078	NM_005206	CRK	v-crk sarcoma virus CT10 oncogene homolog (avian)	0	0	1	0	0	0	1	1	0	1	0
hsa-miR-23a	MIMAT0000078	NM_005235	ERBB4	v-erb-a erythroblastic leukemia viral oncogene homolog 4 (avian)	0	0	1	1	0	0	0	1	0	1	0
hsa-miR-23a	MIMAT0000078	NM_005295	GPR22	G protein-coupled receptor 22	0	0	1	1	0	0	0	1	0	1	0
hsa-miR-23a	MIMAT0000078	NM_005308	GRK5	G protein-coupled receptor kinase 5	0	0	0	0	0	0	1	1	0	1	1
hsa-miR-23a	MIMAT0000078	NM_005364	MAGEA8	melanoma antigen family A, 8	0	0	1	1	0	0	0	1	0	1	0
hsa-miR-23a	MIMAT0000078	NM_005433	YES1	v-yes-1 Yamaguchi sarcoma viral oncogene homolog 1	0	0	1	0	0	0	0	1	0	1	1
hsa-miR-23a	MIMAT0000078	NM_005471	GNPDA1	glucosamine-6-phosphate deaminase 1	0	0	1	1	0	0	0	1	0	1	0
hsa-miR-23a	MIMAT0000078	NM_005486	TOM1L1	target of myb1 (chicken)-like 1	0	0	1	1	0	0	0	1	0	1	0
hsa-miR-23a	MIMAT0000078	NM_005502	ABCA1	ATP-binding cassette, sub-family A (ABC1), member 1	0	0	1	0	0	0	0	1	0	1	1
hsa-miR-23a	MIMAT0000078	NM_005504	BCAT1	branched chain aminotransferase 1, cytosolic	0	0	1	1	0	0	0	1	0	1	0
hsa-miR-23a	MIMAT0000078	NM_005509	DMXL1	Dmx-like 1	0	0	0	0	0	0	1	1	0	1	1
hsa-miR-23a	MIMAT0000078	NM_005522	HOXA1	homeobox A1	0	0	0	0	0	0	1	1	0	1	1
hsa-miR-23a	MIMAT0000078	NM_005524	HES1	hairy and enhancer of split 1, (Drosophila)	0	0	0	0	0	1	1	1	0	1	0
hsa-miR-23a	MIMAT0000078	NM_005586	MDFI	MyoD family inhibitor	0	0	0	0	0	0	1	1	0	1	1
hsa-miR-23a	MIMAT0000078	NM_005596	NFIB	nuclear factor I/B	0	0	1	0	0	0	0	1	0	1	1
hsa-miR-23a	MIMAT0000078	NM_005650	TCF20	transcription factor 20 (AR1)	0	0	1	1	0	0	0	1	0	1	0
hsa-miR-23a	MIMAT0000078	NM_005669	REEP5	receptor accessory protein 5	0	0	1	1	0	0	0	1	0	1	0
hsa-miR-23a	MIMAT0000078	NM_005756	GPR64	G protein-coupled receptor 64	0	0	0	1	0	0	1	1	0	1	0
hsa-miR-23a	MIMAT0000078	NM_005801	EIF1	eukaryotic translation initiation factor 1	0	0	1	0	0	0	0	1	0	1	1
hsa-miR-23a	MIMAT0000078	NM_005819	STX6	syntaxin 6	0	0	1	1	0	0	0	1	0	1	0
hsa-miR-23a	MIMAT0000078	NM_005898	CAPRIN1	cell cycle associated protein 1	0	0	1	1	0	0	0	1	0	1	0
hsa-miR-23a	MIMAT0000078	NM_005902	SMAD3	SMAD family member 3	0	0	1	0	0	0	0	1	0	1	1
hsa-miR-23a	MIMAT0000078	NM_005909	MAP1B	microtubule-associated protein 1B	0	0	1	1	0	0	0	1	0	1	0
hsa-miR-23a	MIMAT0000078	NM_005923	MAP3K5	mitogen-activated protein kinase kinase kinase 5	0	0	0	0	0	0	1	1	0	1	1
hsa-miR-23a	MIMAT0000078	NM_005999	TSNAX	translin-associated factor X	0	0	1	1	0	0	0	1	0	1	0
hsa-miR-23a	MIMAT0000078	NM_006003	UQCRFS1	ubiquinol-cytochrome c reductase, Rieske iron-sulfur polypeptide 1	0	0	0	1	0	0	0	1	0	1	1
hsa-miR-23a	MIMAT0000078	NM_006029	PNMA1	paraneoplastic antigen MA1	0	0	1	1	0	0	0	1	0	1	0
hsa-miR-23a	MIMAT0000078	NM_006039	MRC2	mannose receptor, C type 2	0	0	1	0	0	0	0	1	0	1	1
hsa-miR-23a	MIMAT0000078	NM_006055	LANCL1	LanC lantibiotic synthetase component C-like 1 (bacterial)	0	0	1	1	0	0	0	1	0	1	0
hsa-miR-23a	MIMAT0000078	NM_006122	MAN2A2	mannosidase, alpha, class 2A, member 2	0	0	1	1	0	0	0	1	0	1	0
hsa-miR-23a	MIMAT0000078	NM_006300	ZNF230	zinc finger protein 230	0	0	1	1	0	0	0	1	0	1	0
hsa-miR-23a	MIMAT0000078	NM_006359	SLC9A6	solute carrier family 9 (sodium/hydrogen exchanger), member 6	0	0	1	0	0	0	1	1	0	1	0
hsa-miR-23a	MIMAT0000078	NM_006383	CIB2	calcium and integrin binding family member 2	0	0	0	0	0	0	1	1	0	1	1
hsa-miR-23a	MIMAT0000078	NM_006390	IPO8	importin 8	0	0	1	0	0	0	1	1	0	1	0
hsa-miR-23a	MIMAT0000078	NM_006457	PDLIM5	PDZ and LIM domain 5	0	0	1	1	0	0	0	1	0	1	0
hsa-miR-23a	MIMAT0000078	NM_006467	POLR3G	polymerase (RNA) III (DNA directed) polypeptide G (32kD)	0	0	1	1	0	0	0	1	0	1	0
hsa-miR-23a	MIMAT0000078	NM_006479	RAD51AP1	RAD51 associated protein 1	0	0	1	1	0	0	0	1	0	1	0
hsa-miR-23a	MIMAT0000078	NM_006524	ZNF138	zinc finger protein 138	0	0	1	1	0	0	0	1	0	1	0
hsa-miR-23a	MIMAT0000078	NM_006528	TFPI2	tissue factor pathway inhibitor 2	0	0	0	0	0	0	1	1	0	1	1
hsa-miR-23a	MIMAT0000078	NM_006581	FUT9	fucosyltransferase 9 (alpha (1,3) fucosyltransferase)	0	0	1	0	0	0	0	1	0	1	1
hsa-miR-23a	MIMAT0000078	NM_006614	CHL1	cell adhesion molecule with homology to L1CAM (close homolog of L1)	0	0	1	1	0	0	0	1	0	1	0
hsa-miR-23a	MIMAT0000078	NM_006646	WASF3	WAS protein family, member 3	0	0	1	1	0	0	0	1	0	1	0
hsa-miR-23a	MIMAT0000078	NM_006658	C7orf16	chromosome 7 open reading frame 16	0	0	1	1	0	0	0	1	0	1	0
hsa-miR-23a	MIMAT0000078	NM_006718	PLAGL1	pleiomorphic adenoma gene-like 1	0	0	1	0	0	0	1	1	0	1	0
hsa-miR-23a	MIMAT0000078	NM_006732	FOSB	FBJ murine osteosarcoma viral oncogene homolog B	0	0	0	0	0	0	1	1	0	1	1
hsa-miR-23a	MIMAT0000078	NM_006745	SC4MOL	sterol-C4-methyl oxidase-like	0	0	1	1	0	0	0	1	0	1	0
hsa-miR-23a	MIMAT0000078	NM_006813	PNRC1	proline-rich nuclear receptor coactivator 1	0	0	1	1	0	0	0	1	0	1	0
hsa-miR-23a	MIMAT0000078	NM_006885	ZFHX3	zinc finger homeobox 3	0	0	1	0	0	0	0	1	0	1	1
hsa-miR-23a	MIMAT0000078	NM_006915	RP2	retinitis pigmentosa 2 (X-linked recessive)	0	0	1	1	0	0	0	1	0	1	0
hsa-miR-23a	MIMAT0000078	NM_006917	RXRG	retinoid X receptor, gamma	0	0	1	1	0	0	0	1	0	1	0
hsa-miR-23a	MIMAT0000078	NM_006924	SFRS1	splicing factor, arginine/serine-rich 1 (splicing factor 2, alternate splicing factor)	0	0	1	1	0	0	0	1	0	1	0
hsa-miR-23a	MIMAT0000078	NM_007006	NUDT21	nudix (nucleoside diphosphate linked moiety X)-type motif 21	0	0	1	1	0	0	0	1	0	1	0
hsa-miR-23a	MIMAT0000078	NM_007027	TOPBP1	topoisomerase (DNA) II binding protein 1	0	0	1	1	0	0	0	1	0	1	0
hsa-miR-23a	MIMAT0000078	NM_007038	ADAMTS5	ADAM metallopeptidase with thrombospondin type 1 motif, 5 (aggrecanase-2)	0	0	1	0	0	0	0	1	0	1	1
hsa-miR-23a	MIMAT0000078	NM_007106	UBL3	ubiquitin-like 3	0	0	1	1	0	0	0	1	0	1	0
hsa-miR-23a	MIMAT0000078	NM_007107	SSR3	signal sequence receptor, gamma (translocon-associated protein gamma)	0	0	1	1	0	0	0	1	0	1	0
hsa-miR-23a	MIMAT0000078	NM_007115	TNFAIP6	tumor necrosis factor, alpha-induced protein 6	0	0	0	1	0	0	1	1	0	1	0
hsa-miR-23a	MIMAT0000078	NM_007153	ZNF208	zinc finger protein 208	0	0	1	1	0	0	0	1	0	1	0
hsa-miR-23a	MIMAT0000078	NM_007159	SLMAP	sarcolemma associated protein	0	0	1	0	0	0	0	1	0	1	1
hsa-miR-23a	MIMAT0000078	NM_007175	ERLIN2	ER lipid raft associated 2	0	0	0	0	0	0	1	1	0	1	1
hsa-miR-23a	MIMAT0000078	NM_007190	SEC23IP	SEC23 interacting protein	0	0	1	1	0	0	0	1	0	1	0
hsa-miR-23a	MIMAT0000078	NM_007222	ZHX1	zinc fingers and homeoboxes 1	0	0	1	1	0	0	0	1	0	1	0
hsa-miR-23a	MIMAT0000078	NM_007247	AP1GBP1	AP1 gamma subunit binding protein 1	0	0	1	1	0	0	0	1	0	1	0
hsa-miR-23a	MIMAT0000078	NM_007257	PNMA2	paraneoplastic antigen MA2	0	0	1	1	0	0	0	1	0	1	0
hsa-miR-23a	MIMAT0000078	NM_007345	ZNF236	zinc finger protein 236	0	0	1	0	0	0	0	1	0	1	1
hsa-miR-23a	MIMAT0000078	NM_007350	PHLDA1	pleckstrin homology-like domain, family A, member 1	0	0	1	1	0	0	0	1	0	1	0
hsa-miR-23a	MIMAT0000078	NM_012072	CD93	CD93 molecule	0	0	1	1	0	0	0	1	0	1	0
hsa-miR-23a	MIMAT0000078	NM_012141	INTS6	integrator complex subunit 6	0	0	1	1	0	0	0	1	0	1	0
hsa-miR-23a	MIMAT0000078	NM_012166	FBXO10	F-box protein 10	0	0	1	0	0	0	0	1	0	1	1
hsa-miR-23a	MIMAT0000078	NM_012252	TFEC	transcription factor EC	0	0	1	1	0	0	0	1	0	1	0
hsa-miR-23a	MIMAT0000078	NM_012302	LPHN2	latrophilin 2	0	0	0	1	0	0	0	1	0	1	1
hsa-miR-23a	MIMAT0000078	NM_012382	TTC33	tetratricopeptide repeat domain 33	0	0	1	1	0	0	0	1	0	1	0
hsa-miR-23a	MIMAT0000078	NM_012420	IFIT5	interferon-induced protein with tetratricopeptide repeats 5	0	0	1	1	0	0	0	1	0	1	0
hsa-miR-23a	MIMAT0000078	NM_012482	ZNF281	zinc finger protein 281	0	0	1	1	0	0	0	1	0	1	0
hsa-miR-23a	MIMAT0000078	NM_013229	APAF1	apoptotic peptidase activating factor 1	0	0	1	1	0	0	0	1	0	1	0
hsa-miR-23a	MIMAT0000078	NM_013277	RACGAP1	Rac GTPase activating protein 1	0	0	1	1	0	0	0	1	0	1	0
hsa-miR-23a	MIMAT0000078	NM_013312	HOOK2	hook homolog 2 (Drosophila)	0	0	0	0	0	0	1	1	0	1	1
hsa-miR-23a	MIMAT0000078	NM_013447	EMR2	egf-like module containing, mucin-like, hormone receptor-like 2	0	0	1	1	0	0	0	1	0	1	0
hsa-miR-23a	MIMAT0000078	NM_014023	WDR37	WD repeat domain 37	0	0	1	1	0	0	0	1	0	1	0
hsa-miR-23a	MIMAT0000078	NM_014035	SNX24	sorting nexin 24	0	0	1	1	0	0	0	1	0	1	0
hsa-miR-23a	MIMAT0000078	NM_014117	C16orf72	chromosome 16 open reading frame 72	0	0	0	0	0	0	1	1	0	1	1
hsa-miR-23a	MIMAT0000078	NM_014212	HOXC11	homeobox C11	0	0	0	0	0	0	1	1	0	1	1
hsa-miR-23a	MIMAT0000078	NM_014313	TMEM50A	transmembrane protein 50A	0	0	1	1	0	0	0	1	0	1	0
hsa-miR-23a	MIMAT0000078	NM_014323	PATZ1	POZ (BTB) and AT hook containing zinc finger 1	0	0	1	0	0	0	0	1	0	1	1
hsa-miR-23a	MIMAT0000078	NM_014333	CADM1	cell adhesion molecule 1	0	0	0	0	0	0	1	1	0	1	1
hsa-miR-23a	MIMAT0000078	NM_014415	ZBTB11	zinc finger and BTB domain containing 11	0	0	1	1	0	0	0	1	0	1	0
hsa-miR-23a	MIMAT0000078	NM_014447	ARFIP1	ADP-ribosylation factor interacting protein 1 (arfaptin 1)	0	0	1	1	0	0	0	1	0	1	0
hsa-miR-23a	MIMAT0000078	NM_014515	CNOT2	CCR4-NOT transcription complex, subunit 2	0	0	1	0	0	0	0	1	0	1	1
hsa-miR-23a	MIMAT0000078	NM_014548	TMOD2	tropomodulin 2 (neuronal)	0	0	1	1	0	0	0	1	0	1	0
hsa-miR-23a	MIMAT0000078	NM_014563	TRAPPC2	trafficking protein particle complex 2	0	0	1	1	0	0	0	1	0	1	0
hsa-miR-23a	MIMAT0000078	NM_014631	SH3PXD2A	SH3 and PX domains 2A	0	0	1	0	0	0	0	1	0	1	1
hsa-miR-23a	MIMAT0000078	NM_014649	SAFB2	scaffold attachment factor B2	0	0	1	0	0	0	0	1	0	1	1
hsa-miR-23a	MIMAT0000078	NM_014689	DOCK10	dedicator of cytokinesis 10	0	0	1	0	0	0	0	1	0	1	1
hsa-miR-23a	MIMAT0000078	NM_014721	PHACTR2	phosphatase and actin regulator 2	0	0	1	0	0	0	0	1	0	1	1
hsa-miR-23a	MIMAT0000078	NM_014803	ZNF518A	zinc finger protein 518A	0	0	1	0	0	0	0	1	0	1	1
hsa-miR-23a	MIMAT0000078	NM_014817	KIAA0644	KIAA0644 gene product	0	0	0	1	0	0	0	1	0	1	1
hsa-miR-23a	MIMAT0000078	NM_014819	PJA2	praja 2, RING-H2 motif containing	0	0	1	1	0	0	0	1	0	1	0
hsa-miR-23a	MIMAT0000078	NM_014873	LPGAT1	lysophosphatidylglycerol acyltransferase 1	0	0	1	0	0	0	0	1	0	1	1
hsa-miR-23a	MIMAT0000078	NM_014881	DCLRE1A	DNA cross-link repair 1A (PSO2 homolog, S. cerevisiae)	0	0	1	1	0	0	0	1	0	1	0
hsa-miR-23a	MIMAT0000078	NM_014887	N4BP2L2	NEDD4 binding protein 2-like 2	0	0	1	1	0	0	0	1	0	1	0
hsa-miR-23a	MIMAT0000078	NM_014897	ZNF652	zinc finger protein 652	0	0	1	0	0	0	0	1	0	1	1
hsa-miR-23a	MIMAT0000078	NM_014920	ICK	intestinal cell (MAK-like) kinase	0	0	1	1	0	0	0	1	0	1	0
hsa-miR-23a	MIMAT0000078	NM_014959	CARD8	caspase recruitment domain family, member 8	0	0	1	1	0	0	0	1	0	1	0
hsa-miR-23a	MIMAT0000078	NM_015027	PDXDC1	pyridoxal-dependent decarboxylase domain containing 1	0	0	1	1	0	0	0	1	0	1	0
hsa-miR-23a	MIMAT0000078	NM_015040	PIP5K3	phosphatidylinositol-3-phosphate/phosphatidylinositol 5-kinase, type III	0	0	1	1	0	0	0	1	0	1	0
hsa-miR-23a	MIMAT0000078	NM_015049	TRAK2	trafficking protein, kinesin binding 2	0	0	1	1	0	0	0	1	0	1	0
hsa-miR-23a	MIMAT0000078	NM_015087	SPG20	spastic paraplegia 20 (Troyer syndrome)	0	0	1	1	0	0	0	1	0	1	0
hsa-miR-23a	MIMAT0000078	NM_015088	TNRC6B	trinucleotide repeat containing 6B	0	0	1	1	0	0	0	1	0	1	0
hsa-miR-23a	MIMAT0000078	NM_015100	POGZ	pogo transposable element with ZNF domain	0	0	1	1	0	0	0	1	0	1	0
hsa-miR-23a	MIMAT0000078	NM_015154	MESDC2	mesoderm development candidate 2	0	0	1	1	0	0	0	1	0	1	0
hsa-miR-23a	MIMAT0000078	NM_015196	KIAA0922	KIAA0922	0	0	0	0	0	0	1	1	0	1	1
hsa-miR-23a	MIMAT0000078	NM_015250	BICD2	bicaudal D homolog 2 (Drosophila)	0	0	1	1	0	0	0	1	0	1	0
hsa-miR-23a	MIMAT0000078	NM_015253	WSCD1	WSC domain containing 1	0	0	1	1	0	0	0	1	0	1	0
hsa-miR-23a	MIMAT0000078	NM_015257	TMEM194A	transmembrane protein 194A	0	0	1	1	0	0	0	1	0	1	0
hsa-miR-23a	MIMAT0000078	NM_015275	KIAA1033	KIAA1033	0	0	1	1	0	0	0	1	0	1	0
hsa-miR-23a	MIMAT0000078	NM_015310	PSD3	pleckstrin and Sec7 domain containing 3	0	0	1	0	0	0	0	1	0	1	1
hsa-miR-23a	MIMAT0000078	NM_015336	ZDHHC17	zinc finger, DHHC-type containing 17	0	0	1	1	0	0	0	1	0	1	0
hsa-miR-23a	MIMAT0000078	NM_015435	RNF19A	ring finger protein 19A	0	0	1	1	0	0	0	1	0	1	0
hsa-miR-23a	MIMAT0000078	NM_015436	RCHY1	ring finger and CHY zinc finger domain containing 1	0	0	1	1	0	0	0	1	0	1	0
hsa-miR-23a	MIMAT0000078	NM_015541	LRIG1	leucine-rich repeats and immunoglobulin-like domains 1	0	0	0	0	0	0	1	1	0	1	1
hsa-miR-23a	MIMAT0000078	NM_015550	OSBPL3	oxysterol binding protein-like 3	0	0	1	1	0	0	0	1	0	1	0
hsa-miR-23a	MIMAT0000078	NM_015570	AUTS2	autism susceptibility candidate 2	0	0	0	0	0	0	1	1	0	1	1
hsa-miR-23a	MIMAT0000078	NM_015576	ERC2	ELKS/RAB6-interacting/CAST family member 2	0	0	1	0	0	0	1	1	0	1	0
hsa-miR-23a	MIMAT0000078	NM_015687	FILIP1	filamin A interacting protein 1	0	0	1	1	0	0	0	1	0	1	0
hsa-miR-23a	MIMAT0000078	NM_015878	AZIN1	antizyme inhibitor 1	0	0	1	0	0	0	0	1	0	1	1
hsa-miR-23a	MIMAT0000078	NM_015912	FAM135B	family with sequence similarity 135, member B	0	0	1	1	0	0	0	1	0	1	0
hsa-miR-23a	MIMAT0000078	NM_016045	SLMO2	slowmo homolog 2 (Drosophila)	0	0	1	1	0	0	0	1	0	1	0
hsa-miR-23a	MIMAT0000078	NM_016052	RRP15	ribosomal RNA processing 15 homolog (S. cerevisiae)	0	0	1	1	0	0	0	1	0	1	0
hsa-miR-23a	MIMAT0000078	NM_016072	GOLT1B	golgi transport 1 homolog B (S. cerevisiae)	0	0	1	1	0	0	0	1	0	1	0
hsa-miR-23a	MIMAT0000078	NM_016073	HDGFRP3	hepatoma-derived growth factor, related protein 3	0	0	1	0	0	0	0	1	0	1	1
hsa-miR-23a	MIMAT0000078	NM_016083	CNR1	cannabinoid receptor 1 (brain)	0	0	1	1	0	0	0	1	0	1	0
hsa-miR-23a	MIMAT0000078	NM_016200	LSM8	LSM8 homolog, U6 small nuclear RNA associated (S. cerevisiae)	0	0	1	1	0	0	0	1	0	1	0
hsa-miR-23a	MIMAT0000078	NM_016220	ZNF107	zinc finger protein 107	0	0	1	1	0	0	0	1	0	1	0
hsa-miR-23a	MIMAT0000078	NM_016227	C1orf9	chromosome 1 open reading frame 9	0	0	0	1	0	0	1	1	0	1	0
hsa-miR-23a	MIMAT0000078	NM_016260	IKZF2	IKAROS family zinc finger 2 (Helios)	0	0	1	1	0	0	0	1	0	1	0
hsa-miR-23a	MIMAT0000078	NM_016271	RNF138	ring finger protein 138	0	0	1	0	0	0	1	1	0	1	0
hsa-miR-23a	MIMAT0000078	NM_016272	TOB2	transducer of ERBB2, 2	0	0	1	0	0	0	0	1	0	1	1
hsa-miR-23a	MIMAT0000078	NM_016355	DDX47	DEAD (Asp-Glu-Ala-Asp) box polypeptide 47	0	0	1	1	0	0	0	1	0	1	0
hsa-miR-23a	MIMAT0000078	NM_016470	C20orf111	chromosome 20 open reading frame 111	0	0	1	1	0	0	0	1	0	1	0
hsa-miR-23a	MIMAT0000078	NM_016513	ICK	intestinal cell (MAK-like) kinase	0	0	1	1	0	0	0	1	0	1	0
hsa-miR-23a	MIMAT0000078	NM_016522	HNT	neurotrimin	0	0	1	0	0	0	1	1	0	1	0
hsa-miR-23a	MIMAT0000078	NM_016530	RAB8B	RAB8B, member RAS oncogene family	0	0	1	1	0	0	0	1	0	1	0
hsa-miR-23a	MIMAT0000078	NM_016548	GOLM1	golgi membrane protein 1	0	0	1	1	0	0	0	1	0	1	0
hsa-miR-23a	MIMAT0000078	NM_016620	ZNF644	zinc finger protein 644	0	0	1	0	0	0	1	1	0	1	0
hsa-miR-23a	MIMAT0000078	NM_017420	SIX4	SIX homeobox 4	0	0	1	0	0	0	0	1	0	1	1
hsa-miR-23a	MIMAT0000078	NM_017534	MYH2	myosin, heavy chain 2, skeletal muscle, adult	0	0	0	0	0	0	1	1	0	1	1
hsa-miR-23a	MIMAT0000078	NM_017633	FAM46A	family with sequence similarity 46, member A	0	0	1	0	0	0	0	1	0	1	1
hsa-miR-23a	MIMAT0000078	NM_017637	BNC2	basonuclin 2	0	0	1	0	0	0	0	1	0	1	1
hsa-miR-23a	MIMAT0000078	NM_017644	KLHL24	kelch-like 24 (Drosophila)	0	0	1	1	0	0	0	1	0	1	0
hsa-miR-23a	MIMAT0000078	NM_017645	FAM29A	family with sequence similarity 29, member A	0	0	1	1	0	0	0	1	0	1	0
hsa-miR-23a	MIMAT0000078	NM_017654	SAMD9	sterile alpha motif domain containing 9	0	0	1	1	0	0	0	1	0	1	0
hsa-miR-23a	MIMAT0000078	NM_017658	KLHL28	kelch-like 28 (Drosophila)	0	0	1	1	0	0	0	1	0	1	0
hsa-miR-23a	MIMAT0000078	NM_017666	ZNF280C	zinc finger protein 280C	0	0	1	1	0	0	0	1	0	1	0
hsa-miR-23a	MIMAT0000078	NM_017670	OTUB1	OTU domain, ubiquitin aldehyde binding 1	0	0	0	0	0	0	1	1	0	1	1
hsa-miR-23a	MIMAT0000078	NM_017737	FNBP1L	formin binding protein 1-like	0	0	1	1	0	0	0	1	0	1	0
hsa-miR-23a	MIMAT0000078	NM_017738	CNTLN	centlein, centrosomal protein	0	0	1	1	0	0	0	1	0	1	0
hsa-miR-23a	MIMAT0000078	NM_017761	PNRC2	proline-rich nuclear receptor coactivator 2	0	0	1	1	0	0	0	1	0	1	0
hsa-miR-23a	MIMAT0000078	NM_017768	LRRC40	leucine rich repeat containing 40	0	0	1	1	0	0	0	1	0	1	0
hsa-miR-23a	MIMAT0000078	NM_017770	ELOVL2	elongation of very long chain fatty acids (FEN1/Elo2, SUR4/Elo3, yeast)-like 2	0	0	1	1	0	0	0	1	0	1	0
hsa-miR-23a	MIMAT0000078	NM_017779	DEPDC1	DEP domain containing 1	0	0	1	1	0	0	0	1	0	1	0
hsa-miR-23a	MIMAT0000078	NM_017896	C20orf11	chromosome 20 open reading frame 11	0	0	1	1	0	0	0	1	0	1	0
hsa-miR-23a	MIMAT0000078	NM_017931	TTC38	tetratricopeptide repeat domain 38	0	0	1	1	0	0	0	1	0	1	0
hsa-miR-23a	MIMAT0000078	NM_018003	UACA	uveal autoantigen with coiled-coil domains and ankyrin repeats	0	0	1	1	0	0	0	1	0	1	0
hsa-miR-23a	MIMAT0000078	NM_018036	ATG2B	ATG2 autophagy related 2 homolog B (S. cerevisiae)	0	0	1	1	0	0	0	1	0	1	0
hsa-miR-23a	MIMAT0000078	NM_018042	SLFN12	schlafen family member 12	0	0	1	1	0	0	0	1	0	1	0
hsa-miR-23a	MIMAT0000078	NM_018048	MAGOHB	mago-nashi homolog B (Drosophila)	0	0	0	0	0	0	1	1	0	1	1
hsa-miR-23a	MIMAT0000078	NM_018067	MAP7D1	MAP7 domain containing 1	0	0	1	0	0	0	0	1	0	1	1
hsa-miR-23a	MIMAT0000078	NM_018155	SLC25A36	solute carrier family 25, member 36	0	0	1	1	0	0	0	1	0	1	0
hsa-miR-23a	MIMAT0000078	NM_018159	NUDT11	nudix (nucleoside diphosphate linked moiety X)-type motif 11	0	0	1	0	0	0	0	1	0	1	1
hsa-miR-23a	MIMAT0000078	NM_018178	GOLPH3L	golgi phosphoprotein 3-like	0	0	1	1	0	0	0	1	0	1	0
hsa-miR-23a	MIMAT0000078	NM_018182	C17orf63	chromosome 17 open reading frame 63	0	0	1	0	0	0	1	1	0	1	0
hsa-miR-23a	MIMAT0000078	NM_018191	RCBTB1	regulator of chromosome condensation (RCC1) and BTB (POZ) domain containing protein 1	0	0	1	1	0	0	0	1	0	1	0
hsa-miR-23a	MIMAT0000078	NM_018193	FANCI	Fanconi anemia, complementation group I	0	0	0	0	0	0	1	1	0	1	1
hsa-miR-23a	MIMAT0000078	NM_018215	PNMAL1	PNMA-like 1	0	0	1	1	0	0	0	1	0	1	0
hsa-miR-23a	MIMAT0000078	NM_018237	CCAR1	cell division cycle and apoptosis regulator 1	0	0	0	1	0	0	0	1	0	1	1
hsa-miR-23a	MIMAT0000078	NM_018260	ZNF701	zinc finger protein 701	0	0	1	1	0	0	0	1	0	1	0
hsa-miR-23a	MIMAT0000078	NM_018293	ZNF654	zinc finger protein 654	0	0	0	1	0	0	0	1	0	1	1
hsa-miR-23a	MIMAT0000078	NM_018313	PBRM1	polybromo 1	0	0	1	1	0	0	0	1	0	1	0
hsa-miR-23a	MIMAT0000078	NM_018335	C14orf131	chromosome 14 open reading frame 131	0	0	1	0	0	0	0	1	0	1	1
hsa-miR-23a	MIMAT0000078	NM_018342	TMEM144	transmembrane protein 144	0	0	1	1	0	0	0	1	0	1	0
hsa-miR-23a	MIMAT0000078	NM_018361	AGPAT5	1-acylglycerol-3-phosphate O-acyltransferase 5 (lysophosphatidic acid acyltransferase, epsilon)	0	0	1	1	0	0	0	1	0	1	0
hsa-miR-23a	MIMAT0000078	NM_018367	PHCA	phytoceramidase, alkaline	0	0	1	1	0	0	0	1	0	1	0
hsa-miR-23a	MIMAT0000078	NM_018383	WDR33	WD repeat domain 33	0	0	1	0	0	0	1	1	0	1	0
hsa-miR-23a	MIMAT0000078	NM_018398	CACNA2D3	calcium channel, voltage-dependent, alpha 2/delta subunit 3	0	0	1	0	0	0	0	1	0	1	1
hsa-miR-23a	MIMAT0000078	NM_018449	UBAP2	ubiquitin associated protein 2	0	0	0	0	0	0	1	1	0	1	1
hsa-miR-23a	MIMAT0000078	NM_018466	ALG13	asparagine-linked glycosylation 13 homolog (S. cerevisiae)	0	0	1	1	0	0	0	1	0	1	0
hsa-miR-23a	MIMAT0000078	NM_018469	TEX2	testis expressed 2	0	0	1	0	0	0	0	1	0	1	1
hsa-miR-23a	MIMAT0000078	NM_018566	YOD1	YOD1 OTU deubiquinating enzyme 1 homolog (S. cerevisiae)	0	0	1	1	0	0	0	1	0	1	0
hsa-miR-23a	MIMAT0000078	NM_018622	PARL	presenilin associated, rhomboid-like	0	0	1	1	0	0	0	1	0	1	0
hsa-miR-23a	MIMAT0000078	NM_018684	KIAA1166	KIAA1166	0	0	1	1	0	0	0	1	0	1	0
hsa-miR-23a	MIMAT0000078	NM_018700	TRIM36	tripartite motif-containing 36	0	0	1	1	0	0	0	1	0	1	0
hsa-miR-23a	MIMAT0000078	NM_018703	RBBP6	retinoblastoma binding protein 6	0	0	1	1	0	0	0	1	0	1	0
hsa-miR-23a	MIMAT0000078	NM_018704	CTTNBP2NL	CTTNBP2 N-terminal like	0	0	1	1	0	0	0	1	0	1	0
hsa-miR-23a	MIMAT0000078	NM_018939	PCDHB6	protocadherin beta 6	0	0	1	1	0	0	0	1	0	1	0
hsa-miR-23a	MIMAT0000078	NM_018976	SLC38A2	solute carrier family 38, member 2	0	0	1	1	0	0	0	1	0	1	0
hsa-miR-23a	MIMAT0000078	NM_019001	XRN1	5"-3" exoribonuclease 1	0	0	1	1	0	0	0	1	0	1	0
hsa-miR-23a	MIMAT0000078	NM_019053	EXOC6	exocyst complex component 6	0	0	1	1	0	0	0	1	0	1	0
hsa-miR-23a	MIMAT0000078	NM_019054	FAM35A	family with sequence similarity 35, member A	0	0	1	1	0	0	0	1	0	1	0
hsa-miR-23a	MIMAT0000078	NM_020133	AGPAT4	1-acylglycerol-3-phosphate O-acyltransferase 4 (lysophosphatidic acid acyltransferase, delta)	0	0	1	1	0	0	0	1	0	1	0
hsa-miR-23a	MIMAT0000078	NM_020210	SEMA4B	sema domain, immunoglobulin domain (Ig), transmembrane domain (TM) and short cytoplasmic domain, (semaphorin) 4B	0	0	1	1	0	0	0	1	0	1	0
hsa-miR-23a	MIMAT0000078	NM_020346	SLC17A6	solute carrier family 17 (sodium-dependent inorganic phosphate cotransporter), member 6	0	0	1	1	0	0	0	1	0	1	0
hsa-miR-23a	MIMAT0000078	NM_020347	LZTFL1	leucine zipper transcription factor-like 1	0	0	1	1	0	0	0	1	0	1	0
hsa-miR-23a	MIMAT0000078	NM_020482	FHL5	four and a half LIM domains 5	0	0	1	1	0	0	0	1	0	1	0
hsa-miR-23a	MIMAT0000078	NM_020653	ZNF287	zinc finger protein 287	0	0	1	1	0	0	0	1	0	1	0
hsa-miR-23a	MIMAT0000078	NM_020676	ABHD6	abhydrolase domain containing 6	0	0	1	1	0	0	0	1	0	1	0
hsa-miR-23a	MIMAT0000078	NM_020704	FAM40B	family with sequence similarity 40, member B	0	0	1	1	0	0	0	1	0	1	0
hsa-miR-23a	MIMAT0000078	NM_020755	SERINC1	serine incorporator 1	0	0	1	1	0	0	0	1	0	1	0
hsa-miR-23a	MIMAT0000078	NM_020766	PCDH19	protocadherin 19	0	0	0	1	0	0	0	1	0	1	1
hsa-miR-23a	MIMAT0000078	NM_020783	SYT4	synaptotagmin IV	0	0	1	1	0	0	0	1	0	1	0
hsa-miR-23a	MIMAT0000078	NM_020861	ZBTB2	zinc finger and BTB domain containing 2	0	0	0	0	0	0	1	1	0	1	1
hsa-miR-23a	MIMAT0000078	NM_020922	WNK3	WNK lysine deficient protein kinase 3	0	0	1	0	0	0	1	1	0	1	0
hsa-miR-23a	MIMAT0000078	NM_020964	KIAA1632	KIAA1632	0	0	1	0	0	0	0	1	0	1	1
hsa-miR-23a	MIMAT0000078	NM_021116	ADCY1	adenylate cyclase 1 (brain)	0	0	1	1	0	0	0	1	0	1	0
hsa-miR-23a	MIMAT0000078	NM_021163	RBAK	RB-associated KRAB zinc finger	0	0	1	1	0	0	0	1	0	1	0
hsa-miR-23a	MIMAT0000078	NM_021269	ZNF708	zinc finger protein 708	0	0	1	1	0	0	0	1	0	1	0
hsa-miR-23a	MIMAT0000078	NM_021639	GPBP1L1	GC-rich promoter binding protein 1-like 1	0	0	1	1	0	0	0	1	0	1	0
hsa-miR-23a	MIMAT0000078	NM_021649	TICAM2	toll-like receptor adaptor molecule 2	0	0	1	1	0	0	0	1	0	1	0
hsa-miR-23a	MIMAT0000078	NM_021800	DNAJC12	DnaJ (Hsp40) homolog, subfamily C, member 12	0	0	1	1	0	0	0	1	0	1	0
hsa-miR-23a	MIMAT0000078	NM_021814	ELOVL5	ELOVL family member 5, elongation of long chain fatty acids (FEN1/Elo2, SUR4/Elo3-like, yeast)	0	0	1	1	0	0	0	1	0	1	0
hsa-miR-23a	MIMAT0000078	NM_021964	ZNF148	zinc finger protein 148	0	0	1	0	0	0	0	1	0	1	1
hsa-miR-23a	MIMAT0000078	NM_022048	CSNK1G1	casein kinase 1, gamma 1	0	0	1	0	0	0	0	1	0	1	1
hsa-miR-23a	MIMAT0000078	NM_022066	UBE2O	ubiquitin-conjugating enzyme E2O	0	0	0	0	0	0	1	1	0	1	1
hsa-miR-23a	MIMAT0000078	NM_022173	TIA1	TIA1 cytotoxic granule-associated RNA binding protein	0	0	1	1	0	0	0	1	0	1	0
hsa-miR-23a	MIMAT0000078	NM_022343	C9orf19	chromosome 9 open reading frame 19	0	0	1	1	0	0	0	1	0	1	0
hsa-miR-23a	MIMAT0000078	NM_022368	PJA1	praja 1	0	0	1	1	0	0	0	1	0	1	0
hsa-miR-23a	MIMAT0000078	NM_022458	LMBR1	limb region 1 homolog (mouse)	0	0	1	1	0	0	0	1	0	1	0
hsa-miR-23a	MIMAT0000078	NM_022461	AZI2	5-azacytidine induced 2	0	0	1	1	0	0	0	1	0	1	0
hsa-miR-23a	MIMAT0000078	NM_022482	GZF1	GDNF-inducible zinc finger protein 1	0	0	1	1	0	0	0	1	0	1	0
hsa-miR-23a	MIMAT0000078	NM_022755	IPPK	inositol 1,3,4,5,6-pentakisphosphate 2-kinase	0	0	1	1	0	0	0	1	0	1	0
hsa-miR-23a	MIMAT0000078	NM_022771	TBC1D15	TBC1 domain family, member 15	0	0	0	0	0	0	1	1	0	1	1
hsa-miR-23a	MIMAT0000078	NM_022781	RNF38	ring finger protein 38	0	0	0	1	0	0	1	1	0	1	0
hsa-miR-23a	MIMAT0000078	NM_022832	USP46	ubiquitin specific peptidase 46	0	0	0	0	0	0	1	1	0	1	1
hsa-miR-23a	MIMAT0000078	NM_023009	MARCKSL1	MARCKS-like 1	0	0	0	1	0	0	0	1	0	1	1
hsa-miR-23a	MIMAT0000078	NM_023016	ANKRD57	ankyrin repeat domain 57	0	0	1	1	0	0	0	1	0	1	0
hsa-miR-23a	MIMAT0000078	NM_023073	C5orf42	chromosome 5 open reading frame 42	0	0	1	1	0	0	0	1	0	1	0
hsa-miR-23a	MIMAT0000078	NM_023926	ZSCAN18	zinc finger and SCAN domain containing 18	0	0	1	1	0	0	0	1	0	1	0
hsa-miR-23a	MIMAT0000078	NM_023934	FUNDC2	FUN14 domain containing 2	0	0	1	1	0	0	0	1	0	1	0
hsa-miR-23a	MIMAT0000078	NM_024308	MGC4172	short-chain dehydrogenase/reductase	0	0	1	1	0	0	0	1	0	1	0
hsa-miR-23a	MIMAT0000078	NM_024332	BRCC3	BRCA1/BRCA2-containing complex, subunit 3	0	0	1	1	0	0	0	1	0	1	0
hsa-miR-23a	MIMAT0000078	NM_024408	NOTCH2	Notch homolog 2 (Drosophila)	0	0	1	0	0	0	0	1	0	1	1
hsa-miR-23a	MIMAT0000078	NM_024560	ACSS3	acyl-CoA synthetase short-chain family member 3	0	0	1	1	0	0	0	1	0	1	0
hsa-miR-23a	MIMAT0000078	NM_024616	C3orf52	chromosome 3 open reading frame 52	0	0	1	1	0	0	0	1	0	1	0
hsa-miR-23a	MIMAT0000078	NM_024642	GALNT12	UDP-N-acetyl-alpha-D-galactosamine:polypeptide N-acetylgalactosaminyltransferase 12 (GalNAc-T12)	0	0	1	1	0	0	0	1	0	1	0
hsa-miR-23a	MIMAT0000078	NM_024646	ZYG11B	zyg-11 homolog B (C. elegans)	0	0	1	0	0	0	0	1	0	1	1
hsa-miR-23a	MIMAT0000078	NM_024666	FLJ11506	hypothetical protein FLJ11506	0	0	1	1	0	0	0	1	0	1	0
hsa-miR-23a	MIMAT0000078	NM_024680	E2F8	E2F transcription factor 8	0	0	1	1	0	0	0	1	0	1	0
hsa-miR-23a	MIMAT0000078	NM_024769	ASAM	adipocyte-specific adhesion molecule	0	0	1	1	0	0	0	1	0	1	0
hsa-miR-23a	MIMAT0000078	NM_025015	HSPA12A	heat shock 70kDa protein 12A	0	0	1	0	0	0	0	1	0	1	1
hsa-miR-23a	MIMAT0000078	NM_025054	VCPIP1	valosin containing protein (p97)/p47 complex interacting protein 1	0	0	1	1	0	0	0	1	0	1	0
hsa-miR-23a	MIMAT0000078	NM_025146	NAT13	N-acetyltransferase 13	0	0	0	0	0	0	1	1	0	1	1
hsa-miR-23a	MIMAT0000078	NM_025180	CEP63	centrosomal protein 63kDa	0	0	1	1	0	0	0	1	0	1	0
hsa-miR-23a	MIMAT0000078	NM_025221	KCNIP4	Kv channel interacting protein 4	0	0	1	1	0	0	0	1	0	1	0
hsa-miR-23a	MIMAT0000078	NM_030623	SPHKAP	SPHK1 interactor, AKAP domain containing	0	0	1	1	0	0	0	1	0	1	0
hsa-miR-23a	MIMAT0000078	NM_030885	MAP4	microtubule-associated protein 4	0	0	1	1	0	0	0	1	0	1	0
hsa-miR-23a	MIMAT0000078	NM_030937	CCNL2	cyclin L2	0	0	0	1	0	0	0	1	0	1	1
hsa-miR-23a	MIMAT0000078	NM_030939	C6orf62	chromosome 6 open reading frame 62	0	0	1	1	0	0	0	1	0	1	0
hsa-miR-23a	MIMAT0000078	NM_031208	FAHD1	fumarylacetoacetate hydrolase domain containing 1	0	0	1	1	0	0	0	1	0	1	0
hsa-miR-23a	MIMAT0000078	NM_031216	SEH1L	SEH1-like (S. cerevisiae)	0	0	1	1	0	0	0	1	0	1	0
hsa-miR-23a	MIMAT0000078	NM_031268	PDPK1	3-phosphoinositide dependent protein kinase-1	0	0	1	1	0	0	0	1	0	1	0
hsa-miR-23a	MIMAT0000078	NM_031372	HNRPDL	heterogeneous nuclear ribonucleoprotein D-like	0	0	1	0	0	0	1	1	0	1	0
hsa-miR-23a	MIMAT0000078	NM_031431	COG3	component of oligomeric golgi complex 3	0	0	1	1	0	0	0	1	0	1	0
hsa-miR-23a	MIMAT0000078	NM_031461	CRISPLD1	cysteine-rich secretory protein LCCL domain containing 1	0	0	1	1	0	0	0	1	0	1	0
hsa-miR-23a	MIMAT0000078	NM_031479	INHBE	inhibin, beta E	0	0	1	1	0	0	0	1	0	1	0
hsa-miR-23a	MIMAT0000078	NM_032012	C9orf5	chromosome 9 open reading frame 5	0	0	1	1	0	0	0	1	0	1	0
hsa-miR-23a	MIMAT0000078	NM_032334	UTP23	UTP23, small subunit (SSU) processome component, homolog (yeast)	0	0	1	1	0	0	0	1	0	1	0
hsa-miR-23a	MIMAT0000078	NM_032505	KBTBD8	kelch repeat and BTB (POZ) domain containing 8	0	0	1	1	0	0	0	1	0	1	0
hsa-miR-23a	MIMAT0000078	NM_032521	PARD6B	par-6 partitioning defective 6 homolog beta (C. elegans)	0	0	1	1	0	0	0	1	0	1	0
hsa-miR-23a	MIMAT0000078	NM_032569	N-PAC	cytokine-like nuclear factor n-pac	0	0	0	0	0	0	1	1	0	1	1
hsa-miR-23a	MIMAT0000078	NM_032576	CYorf15B	chromosome Y open reading frame 15B	0	0	1	1	0	0	0	1	0	1	0
hsa-miR-23a	MIMAT0000078	NM_032606	CAPS2	calcyphosine 2	0	0	1	1	0	0	0	1	0	1	0
hsa-miR-23a	MIMAT0000078	NM_032810	ATAD1	ATPase family, AAA domain containing 1	0	0	1	1	0	0	0	1	0	1	0
hsa-miR-23a	MIMAT0000078	NM_032826	SLC35B4	solute carrier family 35, member B4	0	0	1	1	0	0	0	1	0	1	0
hsa-miR-23a	MIMAT0000078	NM_032828	ZNF587	zinc finger protein 587	0	0	1	1	0	0	0	1	0	1	0
hsa-miR-23a	MIMAT0000078	NM_033083	EAF1	ELL associated factor 1	0	0	1	1	0	0	0	1	0	1	0
hsa-miR-23a	MIMAT0000078	NM_033084	FANCD2	Fanconi anemia, complementation group D2	0	0	1	1	0	0	0	1	0	1	0
hsa-miR-23a	MIMAT0000078	NM_033088	FAM40A	family with sequence similarity 40, member A	0	0	1	1	0	0	0	1	0	1	0
hsa-miR-23a	MIMAT0000078	NM_033181	CNR1	cannabinoid receptor 1 (brain)	0	0	1	1	0	0	0	1	0	1	0
hsa-miR-23a	MIMAT0000078	NM_033380	COL4A5	collagen, type IV, alpha 5 (Alport syndrome)	0	0	0	1	0	0	1	1	0	1	0
hsa-miR-23a	MIMAT0000078	NM_033468	ZNF257	zinc finger protein 257	0	0	1	1	0	0	0	1	0	1	0
hsa-miR-23a	MIMAT0000078	NM_033495	KLHL13	kelch-like 13 (Drosophila)	0	0	1	1	0	0	0	1	0	1	0
hsa-miR-23a	MIMAT0000078	NM_052818	N4BP2L1	NEDD4 binding protein 2-like 1	0	0	1	1	0	0	0	1	0	1	0
hsa-miR-23a	MIMAT0000078	NM_052832	SLC26A7	solute carrier family 26, member 7	0	0	1	0	0	0	1	1	0	1	0
hsa-miR-23a	MIMAT0000078	NM_052851	STARD13	StAR-related lipid transfer (START) domain containing 13	0	0	1	1	0	0	0	1	0	1	0
hsa-miR-23a	MIMAT0000078	NM_052917	GALNT13	UDP-N-acetyl-alpha-D-galactosamine:polypeptide N-acetylgalactosaminyltransferase 13 (GalNAc-T13)	0	0	1	1	0	0	0	1	0	1	0
hsa-miR-23a	MIMAT0000078	NM_052957	ACRC	acidic repeat containing	0	0	1	1	0	0	0	1	0	1	0
hsa-miR-23a	MIMAT0000078	NM_053056	CCND1	cyclin D1	0	0	0	0	0	0	1	1	0	1	1
hsa-miR-23a	MIMAT0000078	NM_053277	CLIC6	chloride intracellular channel 6	0	0	1	1	0	0	0	1	0	1	0
hsa-miR-23a	MIMAT0000078	NM_057159	LPAR1	lysophosphatidic acid receptor 1	0	0	0	1	0	0	1	1	0	1	0
hsa-miR-23a	MIMAT0000078	NM_058163	TSR2	TSR2, 20S rRNA accumulation, homolog (S. cerevisiae)	0	0	1	1	0	0	0	1	0	1	0
hsa-miR-23a	MIMAT0000078	NM_080282	ABCA10	ATP-binding cassette, sub-family A (ABC1), member 10	0	0	1	1	0	0	0	1	0	1	0
hsa-miR-23a	MIMAT0000078	NM_080391	PTP4A2	protein tyrosine phosphatase type IVA, member 2	0	0	1	1	0	0	0	1	0	1	0
hsa-miR-23a	MIMAT0000078	NM_080392	PTP4A2	protein tyrosine phosphatase type IVA, member 2	0	0	1	1	0	0	0	1	0	1	0
hsa-miR-23a	MIMAT0000078	NM_080617	CBLN4	cerebellin 4 precursor	0	0	1	0	0	0	0	1	0	1	1
hsa-miR-23a	MIMAT0000078	NM_080618	CTCFL	CCCTC-binding factor (zinc finger protein)-like	0	0	1	1	0	0	0	1	0	1	0
hsa-miR-23a	MIMAT0000078	NM_080759	DACH1	dachshund homolog 1 (Drosophila)	0	0	1	0	0	0	1	1	0	1	0
hsa-miR-23a	MIMAT0000078	NM_080760	DACH1	dachshund homolog 1 (Drosophila)	0	0	1	0	0	0	1	1	0	1	0
hsa-miR-23a	MIMAT0000078	NM_080927	DCBLD2	discoidin, CUB and LCCL domain containing 2	0	0	1	0	0	0	0	1	0	1	1
hsa-miR-23a	MIMAT0000078	NM_080928	ASB15	ankyrin repeat and SOCS box-containing 15	0	0	0	0	0	0	1	1	0	1	1
hsa-miR-23a	MIMAT0000078	NM_130474	MADD	MAP-kinase activating death domain	0	0	1	0	0	0	0	1	0	1	1
hsa-miR-23a	MIMAT0000078	NM_130811	SNAP25	synaptosomal-associated protein, 25kDa	0	0	1	0	0	0	1	1	0	1	0
hsa-miR-23a	MIMAT0000078	NM_133335	WHSC1	Wolf-Hirschhorn syndrome candidate 1	0	0	0	1	0	0	1	1	0	1	0
hsa-miR-23a	MIMAT0000078	NM_133372	FNIP1	folliculin interacting protein 1	0	0	1	1	0	0	0	1	0	1	0
hsa-miR-23a	MIMAT0000078	NM_133377	RAD1	RAD1 homolog (S. pombe)	0	0	1	1	0	0	0	1	0	1	0
hsa-miR-23a	MIMAT0000078	NM_133631	ROBO1	roundabout, axon guidance receptor, homolog 1 (Drosophila)	0	0	1	1	0	0	0	1	0	1	0
hsa-miR-23a	MIMAT0000078	NM_133646	ZAK	sterile alpha motif and leucine zipper containing kinase AZK	0	0	1	0	0	0	0	1	0	1	1
hsa-miR-23a	MIMAT0000078	NM_134265	WSB1	WD repeat and SOCS box-containing 1	0	0	1	0	0	0	1	1	0	1	0
hsa-miR-23a	MIMAT0000078	NM_138381	OXNAD1	oxidoreductase NAD-binding domain containing 1	0	0	1	1	0	0	0	1	0	1	0
hsa-miR-23a	MIMAT0000078	NM_138415	PHF21B	PHD finger protein 21B	0	0	0	0	0	0	1	1	0	1	1
hsa-miR-23a	MIMAT0000078	NM_138638	CFL2	cofilin 2 (muscle)	0	0	1	1	0	0	0	1	0	1	0
hsa-miR-23a	MIMAT0000078	NM_138779	C13orf27	chromosome 13 open reading frame 27	0	0	1	1	0	0	0	1	0	1	0
hsa-miR-23a	MIMAT0000078	NM_139207	NAP1L1	nucleosome assembly protein 1-like 1	0	0	1	0	0	0	0	1	0	1	1
hsa-miR-23a	MIMAT0000078	NM_139248	LIPH	lipase, member H	0	0	1	1	0	0	0	1	0	1	0
hsa-miR-23a	MIMAT0000078	NM_144497	AKAP12	A kinase (PRKA) anchor protein (gravin) 12	0	0	1	1	0	0	0	1	0	1	0
hsa-miR-23a	MIMAT0000078	NM_144563	RPIA	ribose 5-phosphate isomerase A (ribose 5-phosphate epimerase)	0	0	1	1	0	0	0	1	0	1	0
hsa-miR-23a	MIMAT0000078	NM_144574	WDR20	WD repeat domain 20	0	0	1	0	0	0	1	1	0	1	0
hsa-miR-23a	MIMAT0000078	NM_144635	FAM131A	family with sequence similarity 131, member A	0	0	1	0	0	0	0	1	0	1	1
hsa-miR-23a	MIMAT0000078	NM_144684	ZNF480	zinc finger protein 480	0	0	1	1	0	0	0	1	0	1	0
hsa-miR-23a	MIMAT0000078	NM_144689	ZNF420	zinc finger protein 420	0	0	0	1	0	0	0	1	0	1	1
hsa-miR-23a	MIMAT0000078	NM_144718	CCDC52	coiled-coil domain containing 52	0	0	1	1	0	0	0	1	0	1	0
hsa-miR-23a	MIMAT0000078	NM_144721	THAP6	THAP domain containing 6	0	0	1	1	0	0	0	1	0	1	0
hsa-miR-23a	MIMAT0000078	NM_144766	RGS13	regulator of G-protein signaling 13	0	0	1	1	0	0	0	1	0	1	0
hsa-miR-23a	MIMAT0000078	NM_145246	C10orf4	chromosome 10 open reading frame 4	0	0	1	1	0	0	0	1	0	1	0
hsa-miR-23a	MIMAT0000078	NM_145257	C1orf96	chromosome 1 open reading frame 96	0	0	1	1	0	0	0	1	0	1	0
hsa-miR-23a	MIMAT0000078	NM_145263	SPATA18	spermatogenesis associated 18 homolog (rat)	0	0	1	1	0	0	0	1	0	1	0
hsa-miR-23a	MIMAT0000078	NM_145320	OSBPL3	oxysterol binding protein-like 3	0	0	1	1	0	0	0	1	0	1	0
hsa-miR-23a	MIMAT0000078	NM_145321	OSBPL3	oxysterol binding protein-like 3	0	0	1	1	0	0	0	1	0	1	0
hsa-miR-23a	MIMAT0000078	NM_145322	OSBPL3	oxysterol binding protein-like 3	0	0	1	1	0	0	0	1	0	1	0
hsa-miR-23a	MIMAT0000078	NM_145649	GCNT2	glucosaminyl (N-acetyl) transferase 2, I-branching enzyme (I blood group)	0	0	1	1	0	0	0	1	0	1	0
hsa-miR-23a	MIMAT0000078	NM_145655	GCNT2	glucosaminyl (N-acetyl) transferase 2, I-branching enzyme (I blood group)	0	0	1	1	0	0	0	1	0	1	0
hsa-miR-23a	MIMAT0000078	NM_145686	MAP4K4	mitogen-activated protein kinase kinase kinase kinase 4	0	0	1	1	0	0	0	1	0	1	0
hsa-miR-23a	MIMAT0000078	NM_145733	2003-09-01	septin 3	0	0	0	1	0	0	1	1	0	1	0
hsa-miR-23a	MIMAT0000078	NM_145735	ARHGEF7	Rho guanine nucleotide exchange factor (GEF) 7	0	0	1	0	0	0	1	1	0	1	0
hsa-miR-23a	MIMAT0000078	NM_147128	ZNRF2	zinc and ring finger 2	0	0	1	1	0	0	0	1	0	1	0
hsa-miR-23a	MIMAT0000078	NM_147175	HS6ST2	heparan sulfate 6-O-sulfotransferase 2	0	0	0	1	0	0	1	1	0	1	0
hsa-miR-23a	MIMAT0000078	NM_147181	KCNIP4	Kv channel interacting protein 4	0	0	1	1	0	0	0	1	0	1	0
hsa-miR-23a	MIMAT0000078	NM_147182	KCNIP4	Kv channel interacting protein 4	0	0	1	1	0	0	0	1	0	1	0
hsa-miR-23a	MIMAT0000078	NM_147183	KCNIP4	Kv channel interacting protein 4	0	0	1	1	0	0	0	1	0	1	0
hsa-miR-23a	MIMAT0000078	NM_152424	FAM123B	family with sequence similarity 123B	0	0	1	0	0	0	0	1	0	1	1
hsa-miR-23a	MIMAT0000078	NM_152475	ZNF417	zinc finger protein 417	0	0	1	1	0	0	0	1	0	1	0
hsa-miR-23a	MIMAT0000078	NM_152486	SAMD11	sterile alpha motif domain containing 11	0	0	1	1	0	0	0	1	0	1	0
hsa-miR-23a	MIMAT0000078	NM_152529	GPR155	G protein-coupled receptor 155	0	0	1	1	0	0	0	1	0	1	0
hsa-miR-23a	MIMAT0000078	NM_152574	C9orf52	chromosome 9 open reading frame 52	0	0	1	1	0	0	0	1	0	1	0
hsa-miR-23a	MIMAT0000078	NM_152613	WBP2NL	WBP2 N-terminal like	0	0	1	1	0	0	0	1	0	1	0
hsa-miR-23a	MIMAT0000078	NM_152624	DCP2	DCP2 decapping enzyme homolog (S. cerevisiae)	0	0	1	1	0	0	0	1	0	1	0
hsa-miR-23a	MIMAT0000078	NM_152829	TES	testis derived transcript (3 LIM domains)	0	0	1	1	0	0	0	1	0	1	0
hsa-miR-23a	MIMAT0000078	NM_152872	FAS	Fas (TNF receptor superfamily, member 6)	0	0	0	1	0	0	1	1	0	1	0
hsa-miR-23a	MIMAT0000078	NM_152874	FAS	Fas (TNF receptor superfamily, member 6)	0	0	0	1	0	0	1	1	0	1	0
hsa-miR-23a	MIMAT0000078	NM_152877	FAS	Fas (TNF receptor superfamily, member 6)	0	0	0	1	0	0	1	1	0	1	0
hsa-miR-23a	MIMAT0000078	NM_152916	EMR2	egf-like module containing, mucin-like, hormone receptor-like 2	0	0	1	1	0	0	0	1	0	1	0
hsa-miR-23a	MIMAT0000078	NM_152917	EMR2	egf-like module containing, mucin-like, hormone receptor-like 2	0	0	1	1	0	0	0	1	0	1	0
hsa-miR-23a	MIMAT0000078	NM_152918	EMR2	egf-like module containing, mucin-like, hormone receptor-like 2	0	0	1	1	0	0	0	1	0	1	0
hsa-miR-23a	MIMAT0000078	NM_152919	EMR2	egf-like module containing, mucin-like, hormone receptor-like 2	0	0	1	1	0	0	0	1	0	1	0
hsa-miR-23a	MIMAT0000078	NM_152920	EMR2	egf-like module containing, mucin-like, hormone receptor-like 2	0	0	1	1	0	0	0	1	0	1	0
hsa-miR-23a	MIMAT0000078	NM_152921	EMR2	egf-like module containing, mucin-like, hormone receptor-like 2	0	0	1	1	0	0	0	1	0	1	0
hsa-miR-23a	MIMAT0000078	NM_152999	STEAP2	six transmembrane epithelial antigen of the prostate 2	0	0	1	1	0	0	0	1	0	1	0
hsa-miR-23a	MIMAT0000078	NM_153029	N4BP1	NEDD4 binding protein 1	0	0	1	1	0	0	0	1	0	1	0
hsa-miR-23a	MIMAT0000078	NM_153226	TMEM20	transmembrane protein 20	0	0	1	1	0	0	0	1	0	1	0
hsa-miR-23a	MIMAT0000078	NM_153236	GIMAP7	GTPase, IMAP family member 7	0	0	1	1	0	0	0	1	0	1	0
hsa-miR-23a	MIMAT0000078	NM_153257	ZNF461	zinc finger protein 461	0	0	1	1	0	0	0	1	0	1	0
hsa-miR-23a	MIMAT0000078	NM_153617	SEMA6D	sema domain, transmembrane domain (TM), and cytoplasmic domain, (semaphorin) 6D	0	0	0	1	0	0	1	1	0	1	0
hsa-miR-23a	MIMAT0000078	NM_153620	HOXA1	homeobox A1	0	0	1	0	0	0	1	1	0	1	0
hsa-miR-23a	MIMAT0000078	NM_153631	HOXA3	homeobox A3	0	0	1	1	0	0	0	1	0	1	0
hsa-miR-23a	MIMAT0000078	NM_153632	HOXA3	homeobox A3	0	0	1	1	0	0	0	1	0	1	0
hsa-miR-23a	MIMAT0000078	NM_153645	NUP50	nucleoporin 50kDa	0	0	1	1	0	0	0	1	0	1	0
hsa-miR-23a	MIMAT0000078	NM_153810	C10orf46	chromosome 10 open reading frame 46	0	0	1	1	0	0	0	1	0	1	0
hsa-miR-23a	MIMAT0000078	NM_170674	MEIS2	Meis homeobox 2	0	0	0	1	0	0	1	1	0	1	0
hsa-miR-23a	MIMAT0000078	NM_170676	MEIS2	Meis homeobox 2	0	0	0	1	0	0	1	1	0	1	0
hsa-miR-23a	MIMAT0000078	NM_170677	MEIS2	Meis homeobox 2	0	0	0	1	0	0	1	1	0	1	0
hsa-miR-23a	MIMAT0000078	NM_170696	ALDH1A2	aldehyde dehydrogenase 1 family, member A2	0	0	0	1	0	0	1	1	0	1	0
hsa-miR-23a	MIMAT0000078	NM_170697	ALDH1A2	aldehyde dehydrogenase 1 family, member A2	0	0	0	1	0	0	1	1	0	1	0
hsa-miR-23a	MIMAT0000078	NM_170725	PGBD2	piggyBac transposable element derived 2	0	0	1	1	0	0	0	1	0	1	0
hsa-miR-23a	MIMAT0000078	NM_171998	RAB39B	RAB39B, member RAS oncogene family	0	0	1	1	0	0	0	1	0	1	0
hsa-miR-23a	MIMAT0000078	NM_172037	RDH10	retinol dehydrogenase 10 (all-trans)	0	0	1	0	0	0	1	1	0	1	0
hsa-miR-23a	MIMAT0000078	NM_172059	EYA1	eyes absent homolog 1 (Drosophila)	0	0	1	0	0	0	1	1	0	1	0
hsa-miR-23a	MIMAT0000078	NM_172159	KCNAB1	potassium voltage-gated channel, shaker-related subfamily, beta member 1	0	0	1	1	0	0	0	1	0	1	0
hsa-miR-23a	MIMAT0000078	NM_172160	KCNAB1	potassium voltage-gated channel, shaker-related subfamily, beta member 1	0	0	1	1	0	0	0	1	0	1	0
hsa-miR-23a	MIMAT0000078	NM_172315	MEIS2	Meis homeobox 2	0	0	0	1	0	0	1	1	0	1	0
hsa-miR-23a	MIMAT0000078	NM_172316	MEIS2	Meis homeobox 2	0	0	0	1	0	0	1	1	0	1	0
hsa-miR-23a	MIMAT0000078	NM_173175	PTK2B	PTK2B protein tyrosine kinase 2 beta	0	0	0	1	0	0	1	1	0	1	0
hsa-miR-23a	MIMAT0000078	NM_173207	TGIF1	TGFB-induced factor homeobox 1	0	0	0	1	0	0	1	1	0	1	0
hsa-miR-23a	MIMAT0000078	NM_173208	TGIF1	TGFB-induced factor homeobox 1	0	0	0	1	0	0	1	1	0	1	0
hsa-miR-23a	MIMAT0000078	NM_173210	TGIF1	TGFB-induced factor homeobox 1	0	0	0	1	0	0	1	1	0	1	0
hsa-miR-23a	MIMAT0000078	NM_173359	EIF4E3	eukaryotic translation initiation factor 4E family member 3	0	0	1	1	0	0	0	1	0	1	0
hsa-miR-23a	MIMAT0000078	NM_173470	TMEM32	transmembrane protein 32	0	0	1	1	0	0	0	1	0	1	0
hsa-miR-23a	MIMAT0000078	NM_173505	ANKRD29	ankyrin repeat domain 29	0	0	1	1	0	0	0	1	0	1	0
hsa-miR-23a	MIMAT0000078	NM_173517	VKORC1L1	vitamin K epoxide reductase complex, subunit 1-like 1	0	0	0	0	0	0	1	1	0	1	1
hsa-miR-23a	MIMAT0000078	NM_173531	ZNF100	zinc finger protein 100	0	0	1	1	0	0	0	1	0	1	0
hsa-miR-23a	MIMAT0000078	NM_173536	GABRG1	gamma-aminobutyric acid (GABA) A receptor, gamma 1	0	0	1	1	0	0	0	1	0	1	0
hsa-miR-23a	MIMAT0000078	NM_173562	KCTD20	potassium channel tetramerisation domain containing 20	0	0	1	1	0	0	0	1	0	1	0
hsa-miR-23a	MIMAT0000078	NM_173609	C15orf21	chromosome 15 open reading frame 21	0	0	0	1	0	0	1	1	0	1	0
hsa-miR-23a	MIMAT0000078	NM_173642	FAM80A	family with sequence similarity 80, member A	0	0	1	1	0	0	0	1	0	1	0
hsa-miR-23a	MIMAT0000078	NM_173808	NEGR1	neuronal growth regulator 1	0	0	1	1	0	0	0	1	0	1	0
hsa-miR-23a	MIMAT0000078	NM_173829	SFRS12IP1	SFRS12-interacting protein 1	0	0	1	1	0	0	0	1	0	1	0
hsa-miR-23a	MIMAT0000078	NM_173848	RALYL	RALY RNA binding protein-like	0	0	1	1	0	0	0	1	0	1	0
hsa-miR-23a	MIMAT0000078	NM_175056	ZPLD1	zona pellucida-like domain containing 1	0	0	1	1	0	0	0	1	0	1	0
hsa-miR-23a	MIMAT0000078	NM_175623	RAB3IP	RAB3A interacting protein (rabin3)	0	0	1	1	0	0	0	1	0	1	0
hsa-miR-23a	MIMAT0000078	NM_175624	RAB3IP	RAB3A interacting protein (rabin3)	0	0	1	1	0	0	0	1	0	1	0
hsa-miR-23a	MIMAT0000078	NM_175625	RAB3IP	RAB3A interacting protein (rabin3)	0	0	1	1	0	0	0	1	0	1	0
hsa-miR-23a	MIMAT0000078	NM_175634	RUNX1T1	runt-related transcription factor 1; translocated to, 1 (cyclin D-related)	0	0	1	0	0	0	1	1	0	1	0
hsa-miR-23a	MIMAT0000078	NM_175635	RUNX1T1	runt-related transcription factor 1; translocated to, 1 (cyclin D-related)	0	0	1	0	0	0	1	1	0	1	0
hsa-miR-23a	MIMAT0000078	NM_175636	RUNX1T1	runt-related transcription factor 1; translocated to, 1 (cyclin D-related)	0	0	1	0	0	0	1	1	0	1	0
hsa-miR-23a	MIMAT0000078	NM_175856	CHSY3	chondroitin sulfate synthase 3	0	0	0	1	0	0	0	1	0	1	1
hsa-miR-23a	MIMAT0000078	NM_175910	ZNF493	zinc finger protein 493	0	0	1	1	0	0	0	1	0	1	0
hsa-miR-23a	MIMAT0000078	NM_176806	MOCS2	molybdenum cofactor synthesis 2	0	0	1	1	0	0	0	1	0	1	0
hsa-miR-23a	MIMAT0000078	NM_177401	MIDN	midnolin	0	0	1	0	0	0	0	1	0	1	1
hsa-miR-23a	MIMAT0000078	NM_177452	TRAPPC6B	trafficking protein particle complex 6B	0	0	1	1	0	0	0	1	0	1	0
hsa-miR-23a	MIMAT0000078	NM_177937	GOLM1	golgi membrane protein 1	0	0	1	1	0	0	0	1	0	1	0
hsa-miR-23a	MIMAT0000078	NM_178006	STARD13	StAR-related lipid transfer (START) domain containing 13	0	0	1	1	0	0	0	1	0	1	0
hsa-miR-23a	MIMAT0000078	NM_178007	STARD13	StAR-related lipid transfer (START) domain containing 13	0	0	1	1	0	0	0	1	0	1	0
hsa-miR-23a	MIMAT0000078	NM_178544	ZNF546	zinc finger protein 546	0	0	1	1	0	0	0	1	0	1	0
hsa-miR-23a	MIMAT0000078	NM_178826	TMEM16D	transmembrane protein 16D	0	0	0	0	0	0	1	1	0	1	1
hsa-miR-23a	MIMAT0000078	NM_181079	IL21R	interleukin 21 receptor	0	0	1	1	0	0	0	1	0	1	0
hsa-miR-23a	MIMAT0000078	NM_181308	WDR20	WD repeat domain 20	0	0	1	0	0	0	1	1	0	1	0
hsa-miR-23a	MIMAT0000078	NM_181332	NLGN4X	neuroligin 4, X-linked	0	0	1	1	0	0	0	1	0	1	0
hsa-miR-23a	MIMAT0000078	NM_181492	TCF20	transcription factor 20 (AR1)	0	0	1	1	0	0	0	1	0	1	0
hsa-miR-23a	MIMAT0000078	NM_181706	DPH4	DPH4, JJJ3 homolog (S. cerevisiae)	0	0	1	1	0	0	0	1	0	1	0
hsa-miR-23a	MIMAT0000078	NM_181787	DPY19L4	dpy-19-like 4 (C. elegans)	0	0	1	1	0	0	0	1	0	1	0
hsa-miR-23a	MIMAT0000078	NM_181861	APAF1	apoptotic peptidase activating factor 1	0	0	1	1	0	0	0	1	0	1	0
hsa-miR-23a	MIMAT0000078	NM_181868	APAF1	apoptotic peptidase activating factor 1	0	0	1	1	0	0	0	1	0	1	0
hsa-miR-23a	MIMAT0000078	NM_181869	APAF1	apoptotic peptidase activating factor 1	0	0	1	1	0	0	0	1	0	1	0
hsa-miR-23a	MIMAT0000078	NM_181886	UBE2D3	ubiquitin-conjugating enzyme E2D 3 (UBC4/5 homolog, yeast)	0	0	1	1	0	0	0	1	0	1	0
hsa-miR-23a	MIMAT0000078	NM_181887	UBE2D3	ubiquitin-conjugating enzyme E2D 3 (UBC4/5 homolog, yeast)	0	0	1	1	0	0	0	1	0	1	0
hsa-miR-23a	MIMAT0000078	NM_181888	UBE2D3	ubiquitin-conjugating enzyme E2D 3 (UBC4/5 homolog, yeast)	0	0	1	1	0	0	0	1	0	1	0
hsa-miR-23a	MIMAT0000078	NM_181892	UBE2D3	ubiquitin-conjugating enzyme E2D 3 (UBC4/5 homolog, yeast)	0	0	1	1	0	0	0	1	0	1	0
hsa-miR-23a	MIMAT0000078	NM_181893	UBE2D3	ubiquitin-conjugating enzyme E2D 3 (UBC4/5 homolog, yeast)	0	0	1	1	0	0	0	1	0	1	0
hsa-miR-23a	MIMAT0000078	NM_182485	CPEB2	cytoplasmic polyadenylation element binding protein 2	0	0	0	0	0	0	1	1	0	1	1
hsa-miR-23a	MIMAT0000078	NM_182505	C9orf85	chromosome 9 open reading frame 85	0	0	1	1	0	0	0	1	0	1	0
hsa-miR-23a	MIMAT0000078	NM_182644	EPHA3	EPH receptor A3	0	0	1	1	0	0	0	1	0	1	0
hsa-miR-23a	MIMAT0000078	NM_182646	CPEB2	cytoplasmic polyadenylation element binding protein 2	0	0	1	0	0	0	1	1	0	1	0
hsa-miR-23a	MIMAT0000078	NM_182729	TXNRD1	thioredoxin reductase 1	0	0	1	1	0	0	0	1	0	1	0
hsa-miR-23a	MIMAT0000078	NM_182742	TXNRD1	thioredoxin reductase 1	0	0	1	1	0	0	0	1	0	1	0
hsa-miR-23a	MIMAT0000078	NM_182907	PRDM1	PR domain containing 1, with ZNF domain	0	0	1	0	0	0	1	1	0	1	0
hsa-miR-23a	MIMAT0000078	NM_182974	GLT6D1	glycosyltransferase 6 domain containing 1	0	0	1	1	0	0	0	1	0	1	0
hsa-miR-23a	MIMAT0000078	NM_183004	EIF5	eukaryotic translation initiation factor 5	0	0	1	1	0	0	0	1	0	1	0
hsa-miR-23a	MIMAT0000078	NM_183376	ARRDC4	arrestin domain containing 4	0	0	1	1	0	0	0	1	0	1	0
hsa-miR-23a	MIMAT0000078	NM_194272	RBPMS2	RNA binding protein with multiple splicing 2	0	0	1	0	0	0	0	1	0	1	1
hsa-miR-23a	MIMAT0000078	NM_194314	ZBTB41	zinc finger and BTB domain containing 41	0	0	1	0	0	0	1	1	0	1	0
hsa-miR-23a	MIMAT0000078	NM_194325	ZNF30	zinc finger protein 30	0	0	1	1	0	0	0	1	0	1	0
hsa-miR-23a	MIMAT0000078	NM_194431	RNASE4	ribonuclease, RNase A family, 4	0	0	1	1	0	0	0	1	0	1	0
hsa-miR-23a	MIMAT0000078	NM_194434	VAPA	VAMP (vesicle-associated membrane protein)-associated protein A, 33kDa	0	0	1	1	0	0	0	1	0	1	0
hsa-miR-23a	MIMAT0000078	NM_194435	VIP	vasoactive intestinal peptide	0	0	1	1	0	0	0	1	0	1	0
hsa-miR-23a	MIMAT0000078	NM_194442	LBR	lamin B receptor	0	0	0	1	0	0	1	1	0	1	0
hsa-miR-23a	MIMAT0000078	NM_197941	ADAMTS6	ADAM metallopeptidase with thrombospondin type 1 motif, 6	0	0	0	0	0	0	1	1	0	1	1
hsa-miR-23a	MIMAT0000078	NM_198212	CAV2	caveolin 2	0	0	1	1	0	0	0	1	0	1	0
hsa-miR-23a	MIMAT0000078	NM_198256	E2F6	E2F transcription factor 6	0	0	1	1	0	0	0	1	0	1	0
hsa-miR-23a	MIMAT0000078	NM_198381	ELF5	E74-like factor 5 (ets domain transcription factor)	0	0	0	1	0	0	1	1	0	1	0
hsa-miR-23a	MIMAT0000078	NM_198428	BBS9	Bardet-Biedl syndrome 9	0	0	1	1	0	0	0	1	0	1	0
hsa-miR-23a	MIMAT0000078	NM_198461	LONRF2	LON peptidase N-terminal domain and ring finger 2	0	0	1	1	0	0	0	1	0	1	0
hsa-miR-23a	MIMAT0000078	NM_198925	SEMA4B	sema domain, immunoglobulin domain (Ig), transmembrane domain (TM) and short cytoplasmic domain, (semaphorin) 4B	0	0	1	1	0	0	0	1	0	1	0
hsa-miR-23a	MIMAT0000078	NM_199132	ZNF468	zinc finger protein 468	0	0	1	1	0	0	0	1	0	1	0
hsa-miR-23a	MIMAT0000078	NM_199168	CXCL12	chemokine (C-X-C motif) ligand 12 (stromal cell-derived factor 1)	0	0	1	1	0	0	0	1	0	1	0
hsa-miR-23a	MIMAT0000078	NM_199246	CCNG1	cyclin G1	0	0	0	1	0	0	1	1	0	1	0
hsa-miR-23a	MIMAT0000078	NM_199282	ARHGAP27	Rho GTPase activating protein 27	0	0	0	0	0	0	1	1	0	1	1
hsa-miR-23a	MIMAT0000078	NM_199335	FYB	FYN binding protein (FYB-120/130)	0	0	1	1	0	0	0	1	0	1	0
hsa-miR-23a	MIMAT0000078	NM_201224	DDX47	DEAD (Asp-Glu-Ala-Asp) box polypeptide 47	0	0	1	1	0	0	0	1	0	1	0
hsa-miR-23a	MIMAT0000078	NM_201435	CCDC62	coiled-coil domain containing 62	0	0	1	1	0	0	0	1	0	1	0
hsa-miR-23a	MIMAT0000078	NM_203307	ZNF321	zinc finger protein 321	0	0	1	1	0	0	0	1	0	1	0
hsa-miR-23a	MIMAT0000078	NM_203351	MAP3K3	mitogen-activated protein kinase kinase kinase 3	0	0	1	0	0	0	1	1	0	1	0
hsa-miR-23a	MIMAT0000078	NM_203395	IYD	iodotyrosine deiodinase	0	0	1	1	0	0	0	1	0	1	0
hsa-miR-23a	MIMAT0000078	NM_203406	LOC153364	similar to metallo-beta-lactamase superfamily protein	0	0	1	1	0	0	0	1	0	1	0
hsa-miR-23a	MIMAT0000078	NM_203416	CD163	CD163 molecule	0	0	0	0	0	0	1	1	0	1	1
hsa-miR-23a	MIMAT0000078	NM_203459	CAMSAP1L1	calmodulin regulated spectrin-associated protein 1-like 1	0	0	0	1	0	0	0	1	0	1	1
hsa-miR-23a	MIMAT0000078	NM_203505	G3BP2	GTPase activating protein (SH3 domain) binding protein 2	0	0	0	1	0	0	1	1	0	1	0
hsa-miR-23a	MIMAT0000078	NM_205768	ZNF238	zinc finger protein 238	0	0	0	1	0	0	1	1	0	1	0
hsa-miR-23a	MIMAT0000078	NM_206854	QKI	quaking homolog, KH domain RNA binding (mouse)	0	0	0	0	0	0	1	1	0	1	1
hsa-miR-23a	MIMAT0000078	NM_207009	FAM45A	family with sequence similarity 45, member A	0	0	1	1	0	0	0	1	0	1	0
hsa-miR-23a	MIMAT0000078	NM_207171	POGZ	pogo transposable element with ZNF domain	0	0	1	1	0	0	0	1	0	1	0
hsa-miR-23a	MIMAT0000078	NM_207435	FLJ40142	FLJ40142 protein	0	0	1	0	0	0	0	1	0	1	1
hsa-miR-23a	MIMAT0000078	NM_207506	SAMD12	sterile alpha motif domain containing 12	0	0	1	1	0	0	0	1	0	1	0
hsa-miR-23a	MIMAT0000078	NM_212479	ZMYND11	zinc finger, MYND domain containing 11	0	0	0	1	0	0	1	1	0	1	0
hsa-miR-23a	MIMAT0000078	NM_212554	METTL10	methyltransferase like 10	0	0	1	1	0	0	0	1	0	1	0
hsa-miR-23a	MIMAT0000078	NM_213654	ARMC8	armadillo repeat containing 8	0	0	1	1	0	0	0	1	0	1	0
