# Supplementary material for: Astrocyte-Derived Small Extracellular Vesicles Regulate Dendritic Complexity through miR-26a-5p Activity
Source: Preprints.org preprint supplement (doi:10.20944/preprints202002.0250.v1), 2020-02-17
Supplement: Supplementary file 13 [file mir26a 4 buscadores .xls]

## Sheet: result (5).xls
# "1" : interaction predicted; "0" : interaction not predicted.
miRNA ID	miRNA Acc	Refseq	Symbol	Description	diana	microinspector	miranda	mirtarget2	mitarget	nbmirtar	pictar	pita	rna22	rnahybrid	targetscan
hsa-miR-26a	MIMAT0000082	NM_005900	SMAD1	SMAD family member 1	0	0	1	1	0	1	1	1	1	1	0
hsa-miR-26a	MIMAT0000082	NM_005329	HAS3	hyaluronan synthase 3	0	0	1	1	0	0	1	1	0	1	1
hsa-miR-26a	MIMAT0000082	NM_014496	RPS6KA6	ribosomal protein S6 kinase, 90kDa, polypeptide 6	0	0	1	1	0	0	1	1	0	1	1
hsa-miR-26a	MIMAT0000082	NM_014494	TNRC6A	trinucleotide repeat containing 6A	0	0	1	1	0	0	1	1	0	1	1
hsa-miR-26a	MIMAT0000082	NM_005746	NAMPT	nicotinamide phosphoribosyltransferase	0	0	1	1	0	0	1	1	0	1	1
hsa-miR-26a	MIMAT0000082	NM_181670	ANKS1B	ankyrin repeat and sterile alpha motif domain containing 1B	0	0	1	1	0	0	1	1	0	1	1
hsa-miR-26a	MIMAT0000082	NM_005749	TOB1	transducer of ERBB2, 1	0	0	1	1	0	0	1	1	0	1	1
hsa-miR-26a	MIMAT0000082	NM_014363	SACS	spastic ataxia of Charlevoix-Saguenay (sacsin)	0	0	1	1	0	0	1	1	0	1	1
hsa-miR-26a	MIMAT0000082	NM_015630	EPC2	enhancer of polycomb homolog 2 (Drosophila)	0	0	1	1	0	0	1	1	0	1	1
hsa-miR-26a	MIMAT0000082	NM_178812	MTDH	metadherin	0	0	1	1	0	0	1	1	0	1	1
hsa-miR-26a	MIMAT0000082	NM_014290	TDRD7	tudor domain containing 7	0	0	1	1	0	0	1	1	0	1	1
hsa-miR-26a	MIMAT0000082	NM_178507	OAF	OAF homolog (Drosophila)	0	0	1	1	0	0	1	1	0	1	1
hsa-miR-26a	MIMAT0000082	NM_014021	SSX2IP	synovial sarcoma, X breakpoint 2 interacting protein	0	0	1	1	0	0	1	1	0	1	1
hsa-miR-26a	MIMAT0000082	NM_001080	ALDH5A1	aldehyde dehydrogenase 5 family, member A1 (succinate-semialdehyde dehydrogenase)	0	0	1	1	0	0	1	1	0	1	1
hsa-miR-26a	MIMAT0000082	NM_005845	ABCC4	ATP-binding cassette, sub-family C (CFTR/MRP), member 4	0	0	1	1	0	0	1	1	0	1	1
hsa-miR-26a	MIMAT0000082	NM_013450	BAZ2B	bromodomain adjacent to zinc finger domain, 2B	0	0	1	1	0	0	1	1	0	1	1
hsa-miR-26a	MIMAT0000082	NM_182763	MCL1	myeloid cell leukemia sequence 1 (BCL2-related)	0	0	1	1	0	0	1	1	0	1	1
hsa-miR-26a	MIMAT0000082	NM_014810	CEP350	centrosomal protein 350kDa	0	0	1	1	0	0	1	1	0	1	1
hsa-miR-26a	MIMAT0000082	NM_153619	SEMA6D	sema domain, transmembrane domain (TM), and cytoplasmic domain, (semaphorin) 6D	0	0	1	1	0	0	1	1	0	1	1
hsa-miR-26a	MIMAT0000082	NM_003342	UBE2G1	ubiquitin-conjugating enzyme E2G 1 (UBC7 homolog, yeast)	0	0	1	1	0	0	1	1	0	1	1
hsa-miR-26a	MIMAT0000082	NM_003338	UBE2D1	ubiquitin-conjugating enzyme E2D 1 (UBC4/5 homolog, yeast)	0	0	1	1	0	0	1	1	0	1	1
hsa-miR-26a	MIMAT0000082	NM_003305	TRPC3	transient receptor potential cation channel, subfamily C, member 3	0	0	1	1	0	0	1	1	0	1	1
hsa-miR-26a	MIMAT0000082	NM_015245	ANKS1A	ankyrin repeat and sterile alpha motif domain containing 1A	0	0	1	1	0	0	1	1	0	1	1
hsa-miR-26a	MIMAT0000082	NM_021188	ZNF410	zinc finger protein 410	0	0	1	1	0	0	1	1	0	1	1
hsa-miR-26a	MIMAT0000082	NM_021224	ZNF462	zinc finger protein 462	0	0	1	1	0	0	1	1	0	1	1
hsa-miR-26a	MIMAT0000082	NM_198066	GNPNAT1	glucosamine-phosphate N-acetyltransferase 1	0	0	1	1	0	0	1	1	0	1	1
hsa-miR-26a	MIMAT0000082	NM_015138	RTF1	Rtf1, Paf1/RNA polymerase II complex component, homolog (S. cerevisiae)	0	0	1	1	0	0	1	1	0	1	1
hsa-miR-26a	MIMAT0000082	NM_152261	C12orf23	chromosome 12 open reading frame 23	0	0	1	1	0	0	1	1	0	1	1
hsa-miR-26a	MIMAT0000082	NM_021240	DMRT3	doublesex and mab-3 related transcription factor 3	0	0	1	1	0	0	1	1	0	1	1
hsa-miR-26a	MIMAT0000082	NM_015008	TMCC1	transmembrane and coiled-coil domain family 1	0	0	1	1	0	0	1	1	0	1	1
hsa-miR-26a	MIMAT0000082	NM_030625	TET1	tet oncogene 1	0	0	1	1	0	0	1	1	0	1	1
hsa-miR-26a	MIMAT0000082	NM_021643	TRIB2	tribbles homolog 2 (Drosophila)	0	0	1	1	0	0	1	1	0	1	1
hsa-miR-26a	MIMAT0000082	NM_021945	SLC22A23	solute carrier family 22, member 23	0	0	1	1	0	0	1	1	0	1	1
hsa-miR-26a	MIMAT0000082	NM_032822	FAM136A	family with sequence similarity 136, member A	0	0	1	1	0	0	1	1	0	1	1
hsa-miR-26a	MIMAT0000082	NM_022776	OSBPL11	oxysterol binding protein-like 11	0	0	1	1	0	0	1	1	0	1	1
hsa-miR-26a	MIMAT0000082	NM_001124	ADM	adrenomedullin	0	0	1	1	0	0	1	1	0	1	1
hsa-miR-26a	MIMAT0000082	NM_007011	ABHD2	abhydrolase domain containing 2	0	0	1	1	0	0	1	1	0	1	1
hsa-miR-26a	MIMAT0000082	NM_006956	ZNF12	zinc finger protein 12	0	0	1	1	0	0	1	1	0	1	1
hsa-miR-26a	MIMAT0000082	NM_006813	PNRC1	proline-rich nuclear receptor coactivator 1	0	0	1	1	0	0	1	1	0	1	1
hsa-miR-26a	MIMAT0000082	NM_152787	MAP3K7IP3	mitogen-activated protein kinase kinase kinase 7 interacting protein 3	0	0	1	1	0	0	1	1	0	1	1
hsa-miR-26a	MIMAT0000082	NM_153020	RBM24	RNA binding motif protein 24	0	0	1	1	0	0	1	1	0	1	1
hsa-miR-26a	MIMAT0000082	NM_006628	ARPP-19	cyclic AMP phosphoprotein, 19 kD	0	0	1	1	0	0	1	1	0	1	1
hsa-miR-26a	MIMAT0000082	NM_002245	KCNK1	potassium channel, subfamily K, member 1	0	0	1	1	0	0	1	1	0	1	1
hsa-miR-26a	MIMAT0000082	NM_001858	COL19A1	collagen, type XIX, alpha 1	0	0	1	1	0	0	1	1	0	1	1
hsa-miR-26a	MIMAT0000082	NM_153607	C5orf41	chromosome 5 open reading frame 41	0	0	1	1	0	0	1	1	0	1	1
hsa-miR-26a	MIMAT0000082	NM_001969	EIF5	eukaryotic translation initiation factor 5	0	0	1	1	0	0	1	1	0	1	1
hsa-miR-26a	MIMAT0000082	NM_025232	REEP4	receptor accessory protein 4	0	0	1	1	0	0	1	1	0	1	1
hsa-miR-26a	MIMAT0000082	NM_006537	USP3	ubiquitin specific peptidase 3	0	0	1	1	0	0	1	1	0	1	1
hsa-miR-26a	MIMAT0000082	NM_006313	USP15	ubiquitin specific peptidase 15	0	0	1	1	0	0	1	1	0	1	1
hsa-miR-26a	MIMAT0000082	NM_006459	ERLIN1	ER lipid raft associated 1	0	0	1	1	0	0	1	1	0	1	1
hsa-miR-26a	MIMAT0000082	NM_002193	INHBB	inhibin, beta B	0	0	1	1	0	0	1	1	0	1	1
hsa-miR-26a	MIMAT0000082	NM_153757	NAP1L5	nucleosome assembly protein 1-like 5	0	0	1	1	0	0	1	1	0	1	1
hsa-miR-26a	MIMAT0000082	NM_006048	UBE4B	ubiquitination factor E4B (UFD2 homolog, yeast)	0	0	1	1	0	0	1	1	0	1	1
hsa-miR-26a	MIMAT0000082	NM_175854	PAN3	PAN3 polyA specific ribonuclease subunit homolog (S. cerevisiae)	0	0	1	1	0	0	1	1	0	1	1
hsa-miR-26a	MIMAT0000082	NM_002648	PIM1	pim-1 oncogene	0	0	1	1	0	0	1	1	0	1	1
hsa-miR-26a	MIMAT0000082	NM_002591	PCK1	phosphoenolpyruvate carboxykinase 1 (soluble)	0	0	1	1	0	0	1	1	0	1	1
hsa-miR-26a	MIMAT0000082	NM_001259	CDK6	cyclin-dependent kinase 6	0	0	1	1	0	0	1	1	0	1	1
hsa-miR-26a	MIMAT0000082	NM_013233	STK39	serine threonine kinase 39 (STE20/SPS1 homolog, yeast)	0	0	1	1	0	0	1	1	0	1	1
hsa-miR-26a	MIMAT0000082	NM_005909	MAP1B	microtubule-associated protein 1B	0	0	1	1	0	0	1	1	0	1	1
hsa-miR-26a	MIMAT0000082	NM_024111	CHAC1	ChaC, cation transport regulator homolog 1 (E. coli)	0	0	1	1	0	0	1	1	0	1	1
hsa-miR-26a	MIMAT0000082	NM_173648	CCDC141	coiled-coil domain containing 141	0	0	1	1	0	0	1	1	0	1	1
hsa-miR-26a	MIMAT0000082	NM_012297	G3BP2	GTPase activating protein (SH3 domain) binding protein 2	0	0	1	1	0	0	1	1	0	1	1
hsa-miR-26a	MIMAT0000082	NM_012264	TMEM184B	transmembrane protein 184B	0	0	1	1	0	0	1	1	0	1	1
hsa-miR-26a	MIMAT0000082	NM_024306	FA2H	fatty acid 2-hydroxylase	0	0	1	1	0	0	1	1	0	1	1
hsa-miR-26a	MIMAT0000082	NM_152699	SENP5	SUMO1/sentrin specific peptidase 5	0	0	1	1	0	0	1	1	0	1	1
hsa-miR-26a	MIMAT0000082	NM_024525	TTC13	tetratricopeptide repeat domain 13	0	0	1	1	0	0	1	1	0	1	1
hsa-miR-26a	MIMAT0000082	NM_172070	UBR3	ubiquitin protein ligase E3 component n-recognin 3	0	0	1	1	0	0	1	1	0	1	1
hsa-miR-26a	MIMAT0000082	NM_007345	ZNF236	zinc finger protein 236	0	0	1	1	0	0	1	1	0	1	1
hsa-miR-26a	MIMAT0000082	NM_006352	ZNF238	zinc finger protein 238	0	0	1	1	0	0	1	1	0	1	1
hsa-miR-26a	MIMAT0000082	NM_198270	NHS	Nance-Horan syndrome (congenital cataracts and dental anomalies)	0	0	1	1	0	0	1	1	0	1	1
hsa-miR-26a	MIMAT0000082	NM_138369	FAM44B	family with sequence similarity 44, member B	0	0	1	1	0	0	1	1	0	1	1
hsa-miR-26a	MIMAT0000082	NM_004747	DLG5	discs, large homolog 5 (Drosophila)	0	0	1	1	0	0	1	1	0	1	1
hsa-miR-26a	MIMAT0000082	NM_013396	USP25	ubiquitin specific peptidase 25	0	0	1	1	0	0	1	1	0	1	1
hsa-miR-26a	MIMAT0000082	NM_000891	KCNJ2	potassium inwardly-rectifying channel, subfamily J, member 2	0	0	1	1	0	0	1	1	0	1	1
hsa-miR-26a	MIMAT0000082	NM_017437	CPSF2	cleavage and polyadenylation specific factor 2, 100kDa	0	0	1	1	0	0	1	1	0	1	1
hsa-miR-26a	MIMAT0000082	NM_000935	PLOD2	procollagen-lysine, 2-oxoglutarate 5-dioxygenase 2	0	0	1	1	0	0	1	1	0	1	1
hsa-miR-26a	MIMAT0000082	NM_000945	PPP3R1	protein phosphatase 3 (formerly 2B), regulatory subunit B, alpha isoform	0	0	1	1	0	0	1	1	0	1	1
hsa-miR-26a	MIMAT0000082	NM_000963	PTGS2	prostaglandin-endoperoxide synthase 2 (prostaglandin G/H synthase and cyclooxygenase)	0	0	1	1	0	0	1	1	0	1	1
hsa-miR-26a	MIMAT0000082	NM_001001330	REEP3	receptor accessory protein 3	0	0	1	1	0	0	1	1	0	1	1
hsa-miR-26a	MIMAT0000082	NM_001001342	BLOC1S2	biogenesis of lysosome-related organelles complex-1, subunit 2	0	0	1	1	0	0	1	1	0	1	1
hsa-miR-26a	MIMAT0000082	NM_001002838	WNK3	WNK lysine deficient protein kinase 3	0	0	1	1	0	0	1	1	0	1	1
hsa-miR-26a	MIMAT0000082	NM_016626	MEX3C	mex-3 homolog C (C. elegans)	0	0	1	1	0	0	1	1	0	1	1
hsa-miR-26a	MIMAT0000082	NM_004874	BAG4	BCL2-associated athanogene 4	0	0	1	1	0	0	1	1	0	1	1
hsa-miR-26a	MIMAT0000082	NM_020403	PCDH9	protocadherin 9	0	0	1	1	0	0	1	1	0	1	1
hsa-miR-26a	MIMAT0000082	NM_020432	PHTF2	putative homeodomain transcription factor 2	0	0	1	1	0	0	1	1	0	1	1
hsa-miR-26a	MIMAT0000082	NM_000809	GABRA4	gamma-aminobutyric acid (GABA) A receptor, alpha 4	0	0	1	1	0	0	1	1	0	1	1
hsa-miR-26a	MIMAT0000082	NM_000719	CACNA1C	calcium channel, voltage-dependent, L type, alpha 1C subunit	0	0	1	1	0	0	1	1	0	1	1
hsa-miR-26a	MIMAT0000082	NM_000702	ATP1A2	ATPase, Na+/K+ transporting, alpha 2 (+) polypeptide	0	0	1	1	0	0	1	1	0	1	1
hsa-miR-26a	MIMAT0000082	NM_018387	STRBP	spermatid perinuclear RNA binding protein	0	0	1	1	0	0	1	1	0	1	1
hsa-miR-26a	MIMAT0000082	NM_018223	CHFR	checkpoint with forkhead and ring finger domains	0	0	1	1	0	0	1	1	0	1	1
hsa-miR-26a	MIMAT0000082	NM_018571	ALS2CR2	amyotrophic lateral sclerosis 2 (juvenile) chromosome region, candidate 2	0	0	1	1	0	0	1	1	0	1	1
hsa-miR-26a	MIMAT0000082	NM_018169	C12orf35	chromosome 12 open reading frame 35	0	0	1	1	0	0	1	1	0	1	1
hsa-miR-26a	MIMAT0000082	NM_018650	MARK1	MAP/microtubule affinity-regulating kinase 1	0	0	1	1	0	0	1	1	0	1	1
hsa-miR-26a	MIMAT0000082	NM_004170	SLC1A1	solute carrier family 1 (neuronal/epithelial high affinity glutamate transporter, system Xag), member 1	0	0	1	1	0	0	1	1	0	1	1
hsa-miR-26a	MIMAT0000082	NM_018840	C20orf24	chromosome 20 open reading frame 24	0	0	1	1	0	0	1	1	0	1	1
hsa-miR-26a	MIMAT0000082	NM_018976	SLC38A2	solute carrier family 38, member 2	0	0	1	1	0	0	1	1	0	1	1
hsa-miR-26a	MIMAT0000082	NM_000493	COL10A1	collagen, type X, alpha 1(Schmid metaphyseal chondrodysplasia)	0	0	1	1	0	0	1	1	0	1	1
hsa-miR-26a	MIMAT0000082	NM_004457	ACSL3	acyl-CoA synthetase long-chain family member 3	0	0	1	1	0	0	1	1	0	1	1
hsa-miR-26a	MIMAT0000082	NM_019035	PCDH18	protocadherin 18	0	0	1	1	0	0	1	1	0	1	1
hsa-miR-26a	MIMAT0000082	NM_001001484	PTER	phosphotriesterase related	0	0	1	1	0	0	1	1	0	1	1
hsa-miR-26a	MIMAT0000082	NM_004566	PFKFB3	6-phosphofructo-2-kinase/fructose-2,6-biphosphatase 3	0	0	1	1	0	0	1	1	0	1	1
hsa-miR-26a	MIMAT0000082	NM_017680	ASPN	asporin	0	0	1	1	0	0	1	1	0	1	1
hsa-miR-26a	MIMAT0000082	NM_001004196	CD200	CD200 molecule	0	0	1	1	0	0	1	1	0	1	1
hsa-miR-26a	MIMAT0000082	NM_203394	E2F7	E2F transcription factor 7	0	0	1	1	0	0	1	1	0	1	1
hsa-miR-26a	MIMAT0000082	NM_057175	NARG1	NMDA receptor regulated 1	0	0	1	1	0	0	1	1	0	1	1
hsa-miR-26a	MIMAT0000082	NM_015475	FAM98A	family with sequence similarity 98, member A	0	0	1	1	0	0	1	1	0	1	1
hsa-miR-26a	MIMAT0000082	NM_003498	SNN	stannin	0	0	1	1	0	0	1	1	0	1	1
hsa-miR-26a	MIMAT0000082	NM_199324	OTUD4	OTU domain containing 4	0	0	1	1	0	0	1	1	0	1	1
hsa-miR-26a	MIMAT0000082	NM_020792	AADACL1	arylacetamide deacetylase-like 1	0	0	1	1	0	0	1	1	0	1	1
hsa-miR-26a	MIMAT0000082	NM_020850	RANBP10	RAN binding protein 10	0	0	1	1	0	0	1	1	0	1	1
hsa-miR-26a	MIMAT0000082	NM_198992	SYT10	synaptotagmin X	0	0	1	1	0	0	1	1	0	1	1
hsa-miR-26a	MIMAT0000082	NM_015693	INTU	inturned planar cell polarity effector homolog (Drosophila)	0	0	1	1	0	0	1	1	0	1	1
hsa-miR-26a	MIMAT0000082	NM_003477	PDHX	pyruvate dehydrogenase complex, component X	0	0	1	1	0	0	1	1	0	1	1
hsa-miR-26a	MIMAT0000082	NM_000860	HPGD	hydroxyprostaglandin dehydrogenase 15-(NAD)	0	0	1	1	0	0	1	1	0	1	1
hsa-miR-26a	MIMAT0000082	NM_033285	TP53INP1	tumor protein p53 inducible nuclear protein 1	0	0	1	1	0	0	1	1	0	1	1
hsa-miR-26a	MIMAT0000082	NM_199129	TMEM189	transmembrane protein 189	0	0	1	1	0	0	1	1	0	1	1
hsa-miR-26a	MIMAT0000082	NM_003483	HMGA2	high mobility group AT-hook 2	0	0	1	1	0	0	1	1	0	1	1
hsa-miR-26a	MIMAT0000082	NM_015439	CCDC28A	coiled-coil domain containing 28A	0	0	1	1	0	0	1	1	0	1	1
hsa-miR-26a	MIMAT0000082	NM_006254	PRKCD	protein kinase C, delta	0	0	0	1	0	0	1	1	0	1	1
hsa-miR-26a	MIMAT0000082	NM_031845	MAP2	microtubule-associated protein 2	0	0	1	1	0	0	1	1	0	1	0
hsa-miR-26a	MIMAT0000082	NM_033132	ZIC5	Zic family member 5 (odd-paired homolog, Drosophila)	0	0	1	1	0	0	0	1	0	1	1
hsa-miR-26a	MIMAT0000082	NM_033055	HIAT1	hippocampus abundant transcript 1	0	0	1	0	0	0	1	1	0	1	1
hsa-miR-26a	MIMAT0000082	NM_004456	EZH2	enhancer of zeste homolog 2 (Drosophila)	0	0	1	0	0	0	1	1	0	1	1
hsa-miR-26a	MIMAT0000082	NM_033389	SSH2	slingshot homolog 2 (Drosophila)	0	0	1	0	0	0	1	1	0	1	1
hsa-miR-26a	MIMAT0000082	NM_033656	BRWD1	bromodomain and WD repeat domain containing 1	0	0	1	1	0	0	0	1	0	1	1
hsa-miR-26a	MIMAT0000082	NM_004274	AKAP6	A kinase (PRKA) anchor protein 6	0	0	1	0	0	0	1	1	0	1	1
hsa-miR-26a	MIMAT0000082	NM_133263	PPARGC1B	peroxisome proliferator-activated receptor gamma, coactivator 1 beta	0	0	1	0	0	0	1	1	0	1	1
hsa-miR-26a	MIMAT0000082	NM_006206	PDGFRA	platelet-derived growth factor receptor, alpha polypeptide	0	0	1	0	0	0	1	1	0	1	1
hsa-miR-26a	MIMAT0000082	NM_033083	EAF1	ELL associated factor 1	0	0	1	0	0	0	1	1	0	1	1
hsa-miR-26a	MIMAT0000082	NM_005359	SMAD4	SMAD family member 4	0	0	0	1	0	0	1	1	0	1	1
hsa-miR-26a	MIMAT0000082	NM_006212	PFKFB2	6-phosphofructo-2-kinase/fructose-2,6-biphosphatase 2	0	0	1	1	0	0	0	1	0	1	1
hsa-miR-26a	MIMAT0000082	NM_006264	PTPN13	protein tyrosine phosphatase, non-receptor type 13 (APO-1/CD95 (Fas)-associated phosphatase)	0	0	0	1	0	0	1	1	0	1	1
hsa-miR-26a	MIMAT0000082	NM_033274	ADAM19	ADAM metallopeptidase domain 19 (meltrin beta)	0	0	1	0	0	0	1	1	0	1	1
hsa-miR-26a	MIMAT0000082	NM_080927	DCBLD2	discoidin, CUB and LCCL domain containing 2	0	0	1	0	0	0	1	1	0	1	1
hsa-miR-26a	MIMAT0000082	NM_004327	BCR	breakpoint cluster region	0	0	1	1	0	0	0	1	0	1	1
hsa-miR-26a	MIMAT0000082	NM_133265	AMOT	angiomotin	0	0	1	1	0	0	0	1	0	1	1
hsa-miR-26a	MIMAT0000082	NM_004419	DUSP5	dual specificity phosphatase 5	0	0	0	1	0	0	1	1	0	1	1
hsa-miR-26a	MIMAT0000082	NM_030664	PTER	phosphotriesterase related	0	0	1	1	0	0	1	1	0	1	0
hsa-miR-26a	MIMAT0000082	NM_005436	CCDC6	coiled-coil domain containing 6	0	0	1	1	0	0	0	1	0	1	1
hsa-miR-26a	MIMAT0000082	NM_032246	MEX3B	mex-3 homolog B (C. elegans)	0	0	1	0	0	0	1	1	0	1	1
hsa-miR-26a	MIMAT0000082	NM_004938	DAPK1	death-associated protein kinase 1	0	0	0	1	0	0	1	1	0	1	1
hsa-miR-26a	MIMAT0000082	NM_005584	MAB21L1	mab-21-like 1 (C. elegans)	0	0	0	1	0	0	1	1	0	1	1
hsa-miR-26a	MIMAT0000082	NM_003137	SRPK1	SFRS protein kinase 1	0	0	1	0	0	0	1	1	0	1	1
hsa-miR-26a	MIMAT0000082	NM_004463	FGD1	FYVE, RhoGEF and PH domain containing 1 (faciogenital dysplasia)	0	0	0	1	0	0	1	1	0	1	1
hsa-miR-26a	MIMAT0000082	NM_032283	ZDHHC18	zinc finger, DHHC-type containing 18	0	0	1	0	0	0	1	1	0	1	1
hsa-miR-26a	MIMAT0000082	NM_004859	CLTC	clathrin, heavy chain (Hc)	0	0	1	0	0	0	1	1	0	1	1
hsa-miR-26a	MIMAT0000082	NM_005613	RGS4	regulator of G-protein signaling 4	0	0	0	1	0	0	1	1	0	1	1
hsa-miR-26a	MIMAT0000082	NM_005644	TAF12	TAF12 RNA polymerase II, TATA box binding protein (TBP)-associated factor, 20kDa	0	0	1	0	0	0	1	1	0	1	1
hsa-miR-26a	MIMAT0000082	NM_032505	KBTBD8	kelch repeat and BTB (POZ) domain containing 8	0	0	0	1	0	0	1	1	0	1	1
hsa-miR-26a	MIMAT0000082	NM_032458	PHF6	PHD finger protein 6	0	0	1	0	0	0	1	1	0	1	1
hsa-miR-26a	MIMAT0000082	NM_005563	STMN1	stathmin 1/oncoprotein 18	0	0	1	0	0	0	1	1	0	1	1
hsa-miR-26a	MIMAT0000082	NM_005509	DMXL1	Dmx-like 1	0	0	0	1	0	0	1	1	0	1	1
hsa-miR-26a	MIMAT0000082	NM_052911	ESCO1	establishment of cohesion 1 homolog 1 (S. cerevisiae)	0	0	1	0	0	0	1	1	0	1	1
hsa-miR-26a	MIMAT0000082	NM_005977	RNF6	ring finger protein (C3H2C3 type) 6	0	0	1	1	0	0	0	1	0	1	1
hsa-miR-26a	MIMAT0000082	NM_004642	CDK2AP1	CDK2-associated protein 1	0	0	0	1	0	0	1	1	0	1	1
hsa-miR-26a	MIMAT0000082	NM_005966	NAB1	NGFI-A binding protein 1 (EGR1 binding protein 1)	0	0	0	1	0	0	1	1	0	1	1
hsa-miR-26a	MIMAT0000082	NM_004700	KCNQ4	potassium voltage-gated channel, KQT-like subfamily, member 4	0	0	1	0	0	0	1	1	0	1	1
hsa-miR-26a	MIMAT0000082	NM_032833	PPP1R15B	protein phosphatase 1, regulatory (inhibitor) subunit 15B	0	0	1	0	0	0	1	1	0	1	1
hsa-miR-26a	MIMAT0000082	NM_004730	ETF1	eukaryotic translation termination factor 1	0	0	1	0	0	0	1	1	0	1	1
hsa-miR-26a	MIMAT0000082	NM_031847	MAP2	microtubule-associated protein 2	0	0	1	1	0	0	1	1	0	1	0
hsa-miR-26a	MIMAT0000082	NM_005944	CD200	CD200 molecule	0	0	1	1	0	0	1	1	0	1	0
hsa-miR-26a	MIMAT0000082	NM_005880	DNAJA2	DnaJ (Hsp40) homolog, subfamily A, member 2	0	0	1	0	0	0	1	1	0	1	1
hsa-miR-26a	MIMAT0000082	NM_004842	AKAP7	A kinase (PRKA) anchor protein 7	0	0	0	1	0	0	1	1	0	1	1
hsa-miR-26a	MIMAT0000082	NM_052879	LARP4	La ribonucleoprotein domain family, member 4	0	0	1	1	0	0	0	1	0	1	1
hsa-miR-26a	MIMAT0000082	NM_005737	ARL4C	ADP-ribosylation factor-like 4C	0	0	1	0	0	0	1	1	0	1	1
hsa-miR-26a	MIMAT0000082	NM_018370	DRAM	damage-regulated autophagy modulator	0	0	1	0	0	0	1	1	0	1	1
hsa-miR-26a	MIMAT0000082	NM_020747	ZNF608	zinc finger protein 608	0	0	1	1	0	0	0	1	0	1	1
hsa-miR-26a	MIMAT0000082	NM_016377	AKAP7	A kinase (PRKA) anchor protein 7	0	0	1	1	0	0	1	1	0	1	0
hsa-miR-26a	MIMAT0000082	NM_016271	RNF138	ring finger protein 138	0	0	1	0	0	0	1	1	0	1	1
hsa-miR-26a	MIMAT0000082	NM_020782	KLHDC5	kelch domain containing 5	0	0	1	1	0	0	0	1	0	1	1
hsa-miR-26a	MIMAT0000082	NM_015906	TRIM33	tripartite motif-containing 33	0	0	1	1	0	0	0	1	0	1	1
hsa-miR-26a	MIMAT0000082	NM_015652	C10orf12	chromosome 10 open reading frame 12	0	0	1	0	0	0	1	1	0	1	1
hsa-miR-26a	MIMAT0000082	NM_015640	SERBP1	SERPINE1 mRNA binding protein 1	0	0	1	1	0	0	1	1	0	1	0
hsa-miR-26a	MIMAT0000082	NM_015576	ERC2	ELKS/RAB6-interacting/CAST family member 2	0	0	1	1	0	0	0	1	0	1	1
hsa-miR-26a	MIMAT0000082	NM_020922	WNK3	WNK lysine deficient protein kinase 3	0	0	1	1	0	0	1	1	0	1	0
hsa-miR-26a	MIMAT0000082	NM_015447	CAMSAP1	calmodulin regulated spectrin-associated protein 1	0	0	0	1	0	0	1	1	0	1	1
hsa-miR-26a	MIMAT0000082	NM_020935	USP37	ubiquitin specific peptidase 37	0	0	0	1	0	0	1	1	0	1	1
hsa-miR-26a	MIMAT0000082	NM_021132	PPP3CB	protein phosphatase 3 (formerly 2B), catalytic subunit, beta isoform	0	0	0	1	0	0	1	1	0	1	1
hsa-miR-26a	MIMAT0000082	NM_015335	MED13L	mediator complex subunit 13-like	0	0	1	0	0	0	1	1	0	1	1
hsa-miR-26a	MIMAT0000082	NM_015315	LARP1	La ribonucleoprotein domain family, member 1	0	0	1	1	0	0	0	1	0	1	1
hsa-miR-26a	MIMAT0000082	NM_015313	ARHGEF12	Rho guanine nucleotide exchange factor (GEF) 12	0	0	1	0	0	0	1	1	0	1	1
hsa-miR-26a	MIMAT0000082	NM_015310	PSD3	pleckstrin and Sec7 domain containing 3	0	0	1	1	0	0	0	1	0	1	1
hsa-miR-26a	MIMAT0000082	NM_021136	RTN1	reticulon 1	0	0	1	0	0	0	1	1	0	1	1
hsa-miR-26a	MIMAT0000082	NM_020715	PLEKHH1	pleckstrin homology domain containing, family H (with MyTH4 domain) member 1	0	0	1	1	0	0	0	1	0	1	1
hsa-miR-26a	MIMAT0000082	NM_020335	VANGL2	vang-like 2 (van gogh, Drosophila)	0	0	1	1	0	0	0	1	0	1	1
hsa-miR-26a	MIMAT0000082	NM_016929	CLIC5	chloride intracellular channel 5	0	0	1	0	0	0	1	1	0	1	1
hsa-miR-26a	MIMAT0000082	NM_018330	KIAA1598	KIAA1598	0	0	0	1	0	0	1	1	0	1	1
hsa-miR-26a	MIMAT0000082	NM_018191	RCBTB1	regulator of chromosome condensation (RCC1) and BTB (POZ) domain containing protein 1	0	0	1	0	0	0	1	1	0	1	1
hsa-miR-26a	MIMAT0000082	NM_018490	LGR4	leucine-rich repeat-containing G protein-coupled receptor 4	0	0	0	1	0	0	1	1	0	1	1
hsa-miR-26a	MIMAT0000082	NM_018638	ETNK1	ethanolamine kinase 1	0	0	1	1	0	0	0	1	0	1	1
hsa-miR-26a	MIMAT0000082	NM_018126	TMEM33	transmembrane protein 33	0	0	0	1	0	0	1	1	0	1	1
hsa-miR-26a	MIMAT0000082	NM_018704	CTTNBP2NL	CTTNBP2 N-terminal like	0	0	1	0	0	0	1	1	0	1	1
hsa-miR-26a	MIMAT0000082	NM_017998	C9orf40	chromosome 9 open reading frame 40	0	0	0	1	0	0	1	1	0	1	1
hsa-miR-26a	MIMAT0000082	NM_018963	BRWD1	bromodomain and WD repeat domain containing 1	0	0	1	1	0	0	1	1	0	1	0
hsa-miR-26a	MIMAT0000082	NM_018999	KIAA1128	KIAA1128	0	0	1	0	0	0	1	1	0	1	1
hsa-miR-26a	MIMAT0000082	NM_017742	ZCCHC2	zinc finger, CCHC domain containing 2	0	0	1	0	0	0	1	1	0	1	1
hsa-miR-26a	MIMAT0000082	NM_019084	CCNJ	cyclin J	0	0	1	0	0	0	1	1	0	1	1
hsa-miR-26a	MIMAT0000082	NM_017709	FAM46C	family with sequence similarity 46, member C	0	0	1	0	0	0	1	1	0	1	1
hsa-miR-26a	MIMAT0000082	NM_019102	HOXA5	homeobox A5	0	0	0	1	0	0	1	1	0	1	1
hsa-miR-26a	MIMAT0000082	NM_019895	CLDND1	claudin domain containing 1	0	0	1	1	0	0	1	1	0	1	0
hsa-miR-26a	MIMAT0000082	NM_017545	HAO1	hydroxyacid oxidase (glycolate oxidase) 1	0	0	1	0	0	0	1	1	0	1	1
hsa-miR-26a	MIMAT0000082	NM_017540	GALNT10	UDP-N-acetyl-alpha-D-galactosamine:polypeptide N-acetylgalactosaminyltransferase 10 (GalNAc-T10)	0	0	1	0	0	0	1	1	0	1	1
hsa-miR-26a	MIMAT0000082	NM_017423	GALNT7	UDP-N-acetyl-alpha-D-galactosamine:polypeptide N-acetylgalactosaminyltransferase 7 (GalNAc-T7)	0	0	1	0	0	0	1	1	0	1	1
hsa-miR-26a	MIMAT0000082	NM_021180	GRHL3	grainyhead-like 3 (Drosophila)	0	0	0	1	0	0	1	1	0	1	1
hsa-miR-26a	MIMAT0000082	NM_015097	CLASP2	cytoplasmic linker associated protein 2	0	0	1	1	0	0	0	1	0	1	1
hsa-miR-26a	MIMAT0000082	NM_012421	RLF	rearranged L-myc fusion	0	0	1	0	0	0	1	1	0	1	1
hsa-miR-26a	MIMAT0000082	NM_012417	PITPNC1	phosphatidylinositol transfer protein, cytoplasmic 1	0	0	1	1	0	0	1	1	0	1	0
hsa-miR-26a	MIMAT0000082	NM_023929	ZBTB10	zinc finger and BTB domain containing 10	0	0	1	0	0	0	1	1	0	1	1
hsa-miR-26a	MIMAT0000082	NM_012307	EPB41L3	erythrocyte membrane protein band 4.1-like 3	0	0	0	1	0	0	1	1	0	1	1
hsa-miR-26a	MIMAT0000082	NM_012249	RHOQ	ras homolog gene family, member Q	0	0	1	1	0	0	0	1	0	1	1
hsa-miR-26a	MIMAT0000082	NM_012214	MGAT4A	mannosyl (alpha-1,3-)-glycoprotein beta-1,4-N-acetylglucosaminyltransferase, isozyme A	0	0	1	0	0	0	1	1	0	1	1
hsa-miR-26a	MIMAT0000082	NM_012124	CHORDC1	cysteine and histidine-rich domain (CHORD)-containing 1	0	0	0	1	0	0	1	1	0	1	1
hsa-miR-26a	MIMAT0000082	NM_024721	ZFHX4	zinc finger homeobox 4	0	0	1	0	0	0	1	1	0	1	1
hsa-miR-26a	MIMAT0000082	NM_024841	FLJ14213	protor-2	0	0	1	0	0	0	1	1	0	1	1
hsa-miR-26a	MIMAT0000082	NM_006852	TLK2	tousled-like kinase 2	0	0	1	0	0	0	1	1	0	1	1
hsa-miR-26a	MIMAT0000082	NM_025010	KLHL18	kelch-like 18 (Drosophila)	0	0	1	1	0	0	0	1	0	1	1
hsa-miR-26a	MIMAT0000082	NM_025133	FBXO11	F-box protein 11	0	0	0	1	0	0	1	1	0	1	1
hsa-miR-26a	MIMAT0000082	NM_014832	TBC1D4	TBC1 domain family, member 4	0	0	1	1	0	0	0	1	0	1	1
hsa-miR-26a	MIMAT0000082	NM_006609	MAP3K2	mitogen-activated protein kinase kinase kinase 2	0	0	1	0	0	0	1	1	0	1	1
hsa-miR-26a	MIMAT0000082	NM_025191	EDEM3	ER degradation enhancer, mannosidase alpha-like 3	0	0	1	0	0	0	1	1	0	1	1
hsa-miR-26a	MIMAT0000082	NM_006554	MTX2	metaxin 2	0	0	1	1	0	0	1	1	0	1	0
hsa-miR-26a	MIMAT0000082	NM_006526	ZNF217	zinc finger protein 217	0	0	1	0	0	0	1	1	0	1	1
hsa-miR-26a	MIMAT0000082	NM_013313	YPEL1	yippee-like 1 (Drosophila)	0	0	1	0	0	0	1	1	0	1	1
hsa-miR-26a	MIMAT0000082	NM_013390	TMEM2	transmembrane protein 2	0	0	0	1	0	0	1	1	0	1	1
hsa-miR-26a	MIMAT0000082	NM_018369	DEPDC1B	DEP domain containing 1B	0	0	1	0	0	0	1	1	0	1	1
hsa-miR-26a	MIMAT0000082	NM_021229	NTN4	netrin 4	0	0	0	1	0	0	1	1	0	1	1
hsa-miR-26a	MIMAT0000082	NM_015071	ARHGAP26	Rho GTPase activating protein 26	0	0	0	1	0	0	1	1	0	1	1
hsa-miR-26a	MIMAT0000082	NM_021255	PELI2	pellino homolog 2 (Drosophila)	0	0	0	1	0	0	1	1	0	1	1
hsa-miR-26a	MIMAT0000082	NM_014912	CPEB3	cytoplasmic polyadenylation element binding protein 3	0	0	1	0	0	0	1	1	0	1	1
hsa-miR-26a	MIMAT0000082	NM_014807	C2CD2L	C2CD2-like	0	0	1	0	0	0	1	1	0	1	1
hsa-miR-26a	MIMAT0000082	NM_014767	SPOCK2	sparc/osteonectin, cwcv and kazal-like domains proteoglycan (testican) 2	0	0	1	0	0	0	1	1	0	1	1
hsa-miR-26a	MIMAT0000082	NM_022484	TMEM168	transmembrane protein 168	0	0	1	0	0	0	1	1	0	1	1
hsa-miR-26a	MIMAT0000082	NM_014705	DOCK4	dedicator of cytokinesis 4	0	0	1	1	0	0	0	1	0	1	1
hsa-miR-26a	MIMAT0000082	NM_014683	ULK2	unc-51-like kinase 2 (C. elegans)	0	0	0	1	0	0	1	1	0	1	1
hsa-miR-26a	MIMAT0000082	NM_022494	ZDHHC6	zinc finger, DHHC-type containing 6	0	0	0	1	0	0	1	1	0	1	1
hsa-miR-26a	MIMAT0000082	NM_014620	HOXC4	homeobox C4	0	0	1	1	0	0	0	1	0	1	1
hsa-miR-26a	MIMAT0000082	NM_014612	FAM120A	family with sequence similarity 120A	0	0	1	0	0	0	1	1	0	1	1
hsa-miR-26a	MIMAT0000082	NM_014445	SERP1	stress-associated endoplasmic reticulum protein 1	0	0	1	0	0	0	1	1	0	1	1
hsa-miR-26a	MIMAT0000082	NM_014397	NEK6	NIMA (never in mitosis gene a)-related kinase 6	0	0	1	0	0	0	1	1	0	1	1
hsa-miR-26a	MIMAT0000082	NM_022745	ATPAF1	ATP synthase mitochondrial F1 complex assembly factor 1	0	0	1	1	0	0	1	1	0	1	0
hsa-miR-26a	MIMAT0000082	NM_014011	SOCS5	suppressor of cytokine signaling 5	0	0	1	0	0	0	1	1	0	1	1
hsa-miR-26a	MIMAT0000082	NM_014001	GGA3	golgi associated, gamma adaptin ear containing, ARF binding protein 3	0	0	1	0	0	0	1	1	0	1	1
hsa-miR-26a	MIMAT0000082	NM_025235	TNKS2	tankyrase, TRF1-interacting ankyrin-related ADP-ribose polymerase 2	0	0	1	0	0	0	1	1	0	1	1
hsa-miR-26a	MIMAT0000082	NM_002829	PTPN3	protein tyrosine phosphatase, non-receptor type 3	0	0	1	0	0	0	1	1	0	1	1
hsa-miR-26a	MIMAT0000082	NM_001981	EPS15	epidermal growth factor receptor pathway substrate 15	0	0	1	1	0	0	0	1	0	1	1
hsa-miR-26a	MIMAT0000082	NM_001880	ATF2	activating transcription factor 2	0	0	0	1	0	0	1	1	0	1	1
hsa-miR-26a	MIMAT0000082	NM_153616	SEMA6D	sema domain, transmembrane domain (TM), and cytoplasmic domain, (semaphorin) 6D	0	0	1	1	0	0	1	1	0	1	0
hsa-miR-26a	MIMAT0000082	NM_153617	SEMA6D	sema domain, transmembrane domain (TM), and cytoplasmic domain, (semaphorin) 6D	0	0	1	1	0	0	1	1	0	1	0
hsa-miR-26a	MIMAT0000082	NM_153618	SEMA6D	sema domain, transmembrane domain (TM), and cytoplasmic domain, (semaphorin) 6D	0	0	1	1	0	0	1	1	0	1	0
hsa-miR-26a	MIMAT0000082	NM_001759	CCND2	cyclin D2	0	0	1	0	0	0	1	1	0	1	1
hsa-miR-26a	MIMAT0000082	NM_001755	CBFB	core-binding factor, beta subunit	0	0	1	0	0	0	1	1	0	1	1
hsa-miR-26a	MIMAT0000082	NM_001731	BTG1	B-cell translocation gene 1, anti-proliferative	0	0	1	0	0	0	1	1	0	1	1
hsa-miR-26a	MIMAT0000082	NM_001039538	MAP2	microtubule-associated protein 2	0	0	1	1	0	0	0	1	0	1	1
hsa-miR-26a	MIMAT0000082	NM_153646	SLC24A4	solute carrier family 24 (sodium/potassium/calcium exchanger), member 4	0	0	1	0	0	0	1	1	0	1	1
hsa-miR-26a	MIMAT0000082	NM_198399	ARPP-21	cyclic AMP-regulated phosphoprotein, 21 kD	0	0	1	1	0	0	1	1	0	1	0
hsa-miR-26a	MIMAT0000082	NM_001010935	RAP1A	RAP1A, member of RAS oncogene family	0	0	1	1	0	0	0	1	0	1	1
hsa-miR-26a	MIMAT0000082	NM_002093	GSK3B	glycogen synthase kinase 3 beta	0	0	1	0	0	0	1	1	0	1	1
hsa-miR-26a	MIMAT0000082	NM_152924	ABHD2	abhydrolase domain containing 2	0	0	1	1	0	0	1	1	0	1	0
hsa-miR-26a	MIMAT0000082	NM_152423	MUM1L1	melanoma associated antigen (mutated) 1-like 1	0	0	1	0	0	0	1	1	0	1	1
hsa-miR-26a	MIMAT0000082	NM_002725	PRELP	proline/arginine-rich end leucine-rich repeat protein	0	0	1	0	0	0	1	1	0	1	1
hsa-miR-26a	MIMAT0000082	NM_002655	PLAG1	pleiomorphic adenoma gene 1	0	0	1	0	0	0	1	1	0	1	1
hsa-miR-26a	MIMAT0000082	NM_002583	PAWR	PRKC, apoptosis, WT1, regulator	0	0	1	1	0	0	0	1	0	1	1
hsa-miR-26a	MIMAT0000082	NM_001003682	TMEM200B	transmembrane protein 200B	0	0	1	0	0	0	1	1	0	1	1
hsa-miR-26a	MIMAT0000082	NM_001003688	SMAD1	SMAD family member 1	0	0	0	1	0	0	1	1	0	1	1
hsa-miR-26a	MIMAT0000082	NM_203372	ACSL3	acyl-CoA synthetase long-chain family member 3	0	0	1	1	0	0	1	1	0	1	0
hsa-miR-26a	MIMAT0000082	NM_002374	MAP2	microtubule-associated protein 2	0	0	1	1	0	0	1	1	0	1	0
hsa-miR-26a	MIMAT0000082	NM_152707	SLC25A16	solute carrier family 25 (mitochondrial carrier; Graves disease autoantigen), member 16	0	0	0	1	0	0	1	1	0	1	1
hsa-miR-26a	MIMAT0000082	NM_152739	HOXA9	homeobox A9	0	0	1	1	0	0	0	1	0	1	1
hsa-miR-26a	MIMAT0000082	NM_199245	VAMP1	vesicle-associated membrane protein 1 (synaptobrevin 1)	0	0	1	1	0	0	1	1	0	1	0
hsa-miR-26a	MIMAT0000082	NM_002214	ITGB8	integrin, beta 8	0	0	1	1	0	0	0	1	0	1	1
hsa-miR-26a	MIMAT0000082	NM_001010986	ATP11C	ATPase, class VI, type 11C	0	0	1	1	0	0	0	1	0	1	1
hsa-miR-26a	MIMAT0000082	NM_014331	SLC7A11	solute carrier family 7, (cationic amino acid transporter, y+ system) member 11	0	0	1	1	0	0	0	1	0	1	1
hsa-miR-26a	MIMAT0000082	NM_001012339	DNAJC21	DnaJ (Hsp40) homolog, subfamily C, member 21	0	0	1	1	0	0	0	1	0	1	1
hsa-miR-26a	MIMAT0000082	NM_001080412	ZBTB38	zinc finger and BTB domain containing 38	0	0	1	1	0	0	0	1	0	1	1
hsa-miR-26a	MIMAT0000082	NM_001079843	CASZ1	castor zinc finger 1	0	0	1	1	0	0	0	1	0	1	1
hsa-miR-26a	MIMAT0000082	NM_182943	PLOD2	procollagen-lysine, 2-oxoglutarate 5-dioxygenase 2	0	0	1	1	0	0	1	1	0	1	0
hsa-miR-26a	MIMAT0000082	NM_001046	SLC12A2	solute carrier family 12 (sodium/potassium/chloride transporters), member 2	0	0	0	1	0	0	1	1	0	1	1
hsa-miR-26a	MIMAT0000082	NM_181358	HIPK1	homeodomain interacting protein kinase 1	0	0	1	0	0	0	1	1	0	1	1
hsa-miR-26a	MIMAT0000082	NM_212559	XKRX	XK, Kell blood group complex subunit-related, X-linked	0	0	1	0	0	0	1	1	0	1	1
hsa-miR-26a	MIMAT0000082	NM_181521	CMTM4	CKLF-like MARVEL transmembrane domain containing 4	0	0	1	1	0	0	0	1	0	1	1
hsa-miR-26a	MIMAT0000082	NM_181671	PITPNC1	phosphatidylinositol transfer protein, cytoplasmic 1	0	0	0	1	0	0	1	1	0	1	1
hsa-miR-26a	MIMAT0000082	NM_182765	HECTD2	HECT domain containing 2	0	0	1	0	0	0	1	1	0	1	1
hsa-miR-26a	MIMAT0000082	NM_001040181	CLDND1	claudin domain containing 1	0	0	1	1	0	0	0	1	0	1	1
hsa-miR-26a	MIMAT0000082	NM_182734	PLCB1	phospholipase C, beta 1 (phosphoinositide-specific)	0	0	1	0	0	0	1	1	0	1	1
hsa-miR-26a	MIMAT0000082	NM_001039618	CREBZF	CREB/ATF bZIP transcription factor	0	0	1	1	0	0	0	1	0	1	1
hsa-miR-26a	MIMAT0000082	NM_194283	DNAJC21	DnaJ (Hsp40) homolog, subfamily C, member 21	0	0	1	1	0	0	1	1	0	1	0
hsa-miR-26a	MIMAT0000082	NM_001032282	KLF10	Kruppel-like factor 10	0	0	1	1	0	0	0	1	0	1	1
hsa-miR-26a	MIMAT0000082	NM_172020	POM121	POM121 membrane glycoprotein (rat)	0	0	1	0	0	0	1	1	0	1	1
hsa-miR-26a	MIMAT0000082	NM_001017980	LOC203547	hypothetical protein LOC203547	0	0	1	1	0	0	0	1	0	1	1
hsa-miR-26a	MIMAT0000082	NM_173491	LSM11	LSM11, U7 small nuclear RNA associated	0	0	1	0	0	0	1	1	0	1	1
hsa-miR-26a	MIMAT0000082	NM_001018067	SERBP1	SERPINE1 mRNA binding protein 1	0	0	1	1	0	0	0	1	0	1	1
hsa-miR-26a	MIMAT0000082	NM_173494	CXorf41	chromosome X open reading frame 41	0	0	1	1	0	0	0	1	0	1	1
hsa-miR-26a	MIMAT0000082	NM_198174	GRHL3	grainyhead-like 3 (Drosophila)	0	0	1	1	0	0	1	1	0	1	0
hsa-miR-26a	MIMAT0000082	NM_173582	PGM2L1	phosphoglucomutase 2-like 1	0	0	1	0	0	0	1	1	0	1	1
hsa-miR-26a	MIMAT0000082	NM_183004	EIF5	eukaryotic translation initiation factor 5	0	0	1	1	0	0	1	1	0	1	0
hsa-miR-26a	MIMAT0000082	NM_173694	ATP11C	ATPase, class VI, type 11C	0	0	1	1	0	0	1	1	0	1	0
hsa-miR-26a	MIMAT0000082	NM_173809	BLOC1S2	biogenesis of lysosome-related organelles complex-1, subunit 2	0	0	1	1	0	0	1	1	0	1	0
hsa-miR-26a	MIMAT0000082	NM_001024843	TNRC6B	trinucleotide repeat containing 6B	0	0	1	1	0	0	0	1	0	1	1
hsa-miR-26a	MIMAT0000082	NM_197941	ADAMTS6	ADAM metallopeptidase with thrombospondin type 1 motif, 6	0	0	1	0	0	0	1	1	0	1	1
hsa-miR-26a	MIMAT0000082	NM_001039590	USP9X	ubiquitin specific peptidase 9, X-linked	0	0	1	1	0	0	0	1	0	1	1
hsa-miR-26a	MIMAT0000082	NM_002884	RAP1A	RAP1A, member of RAS oncogene family	0	0	1	1	0	0	1	1	0	1	0
hsa-miR-26a	MIMAT0000082	NM_003759	SLC4A4	solute carrier family 4, sodium bicarbonate cotransporter, member 4	0	0	1	0	0	0	1	1	0	1	1
hsa-miR-26a	MIMAT0000082	NM_000328	RPGR	retinitis pigmentosa GTPase regulator	0	0	1	1	0	0	1	1	0	1	0
hsa-miR-26a	MIMAT0000082	NM_003947	KALRN	kalirin, RhoGEF kinase	0	0	1	1	0	0	1	1	0	1	0
hsa-miR-26a	MIMAT0000082	NM_000601	HGF	hepatocyte growth factor (hepapoietin A; scatter factor)	0	0	1	1	0	0	1	1	0	1	0
hsa-miR-26a	MIMAT0000082	NM_145698	ACBD5	acyl-Coenzyme A binding domain containing 5	0	0	1	1	0	0	1	1	0	1	0
hsa-miR-26a	MIMAT0000082	NM_145753	PHLDB2	pleckstrin homology-like domain, family B, member 2	0	0	1	0	0	0	1	1	0	1	1
hsa-miR-26a	MIMAT0000082	NM_145808	MTPN	myotrophin	0	0	1	0	0	0	1	1	0	1	1
hsa-miR-26a	MIMAT0000082	NM_003633	ENC1	ectodermal-neural cortex (with BTB-like domain)	0	0	1	0	0	0	1	1	0	1	1
hsa-miR-26a	MIMAT0000082	NM_205768	ZNF238	zinc finger protein 238	0	0	1	1	0	0	1	1	0	1	0
hsa-miR-26a	MIMAT0000082	NM_000125	ESR1	estrogen receptor 1	0	0	1	0	0	0	1	1	0	1	1
hsa-miR-26a	MIMAT0000082	NM_000093	COL5A1	collagen, type V, alpha 1	0	0	1	0	0	0	1	1	0	1	1
hsa-miR-26a	MIMAT0000082	NM_203487	PCDH9	protocadherin 9	0	0	1	1	0	0	1	1	0	1	0
hsa-miR-26a	MIMAT0000082	NM_145251	STYX	serine/threonine/tyrosine interacting protein	0	0	1	1	0	0	0	1	0	1	1
hsa-miR-26a	MIMAT0000082	NM_003750	EIF3A	eukaryotic translation initiation factor 3, subunit A	0	0	0	1	0	0	1	1	0	1	1
hsa-miR-26a	MIMAT0000082	NM_144984	C10orf72	chromosome 10 open reading frame 72	0	0	1	1	0	0	1	1	0	1	0
hsa-miR-26a	MIMAT0000082	NM_003670	BHLHB2	basic helix-loop-helix domain containing, class B, 2	0	0	1	0	0	0	1	1	0	1	1
hsa-miR-26a	MIMAT0000082	NM_000314	PTEN	phosphatase and tensin homolog (mutated in multiple advanced cancers 1)	0	0	0	1	0	0	1	1	0	1	1
hsa-miR-26a	MIMAT0000082	NM_207647	FSD1L	fibronectin type III and SPRY domain containing 1-like	0	0	1	0	0	0	1	1	0	1	1
hsa-miR-26a	MIMAT0000082	NM_000214	JAG1	jagged 1 (Alagille syndrome)	0	0	0	1	0	0	1	1	0	1	1
hsa-miR-26a	MIMAT0000082	NM_207009	FAM45A	family with sequence similarity 45, member A	0	0	0	1	0	0	1	1	0	1	1
hsa-miR-26a	MIMAT0000082	NM_003565	ULK1	unc-51-like kinase 1 (C. elegans)	0	0	0	1	0	0	1	1	0	1	1
hsa-miR-26a	MIMAT0000082	NM_003489	NRIP1	nuclear receptor interacting protein 1	0	0	1	0	0	0	1	1	0	1	1
hsa-miR-26a	MIMAT0000082	NM_000533	PLP1	proteolipid protein 1 (Pelizaeus-Merzbacher disease, spastic paraplegia 2, uncomplicated)	0	0	1	0	0	0	1	1	0	1	1
hsa-miR-26a	MIMAT0000082	NM_000627	LTBP1	latent transforming growth factor beta binding protein 1	0	0	1	0	0	0	1	1	0	1	1
hsa-miR-26a	MIMAT0000082	NM_001042546	ATPAF1	ATP synthase mitochondrial F1 complex assembly factor 1	0	0	1	1	0	0	0	1	0	1	1
hsa-miR-26a	MIMAT0000082	NM_000621	HTR2A	5-hydroxytryptamine (serotonin) receptor 2A	0	0	0	1	0	0	1	1	0	1	1
hsa-miR-26a	MIMAT0000082	NM_152417	TMEM68	transmembrane protein 68	0	0	1	1	0	0	0	1	0	1	1
hsa-miR-26a	MIMAT0000082	NM_203505	G3BP2	GTPase activating protein (SH3 domain) binding protein 2	0	0	1	1	0	0	1	1	0	1	0
hsa-miR-26a	MIMAT0000082	NM_002968	SALL1	sal-like 1 (Drosophila)	0	0	0	1	0	0	1	1	0	1	1
hsa-miR-26a	MIMAT0000082	NM_000038	APC	adenomatous polyposis coli	0	0	1	1	0	0	0	1	0	1	1
hsa-miR-26a	MIMAT0000082	NM_138459	NUS1	nuclear undecaprenyl pyrophosphate synthase 1 homolog (S. cerevisiae)	0	0	0	1	0	0	1	1	0	1	1
hsa-miR-26a	MIMAT0000082	NM_000051	ATM	ataxia telangiectasia mutated	0	0	1	1	0	0	1	1	0	1	0
hsa-miR-26a	MIMAT0000082	NM_152344	LSM12	LSM12 homolog (S. cerevisiae)	0	0	0	1	0	0	1	1	0	1	1
hsa-miR-26a	MIMAT0000082	NM_000089	COL1A2	collagen, type I, alpha 2	0	0	1	0	0	0	1	1	0	1	1
hsa-miR-26a	MIMAT0000082	NM_003135	SRP19	signal recognition particle 19kDa	0	0	0	1	0	0	1	1	0	1	1
hsa-miR-26a	MIMAT0000082	NM_138633	AKAP7	A kinase (PRKA) anchor protein 7	0	0	1	1	0	0	1	1	0	1	0
hsa-miR-26a	MIMAT0000082	NM_021205	RHOU	ras homolog gene family, member U	0	0	1	1	0	0	0	1	0	1	0
hsa-miR-26a	MIMAT0000082	NM_021202	TP53INP2	tumor protein p53 inducible nuclear protein 2	0	0	0	0	0	0	1	1	0	1	1
hsa-miR-26a	MIMAT0000082	NM_022368	PJA1	praja 1	0	0	1	1	0	0	0	1	0	1	0
hsa-miR-26a	MIMAT0000082	NM_021960	MCL1	myeloid cell leukemia sequence 1 (BCL2-related)	0	0	1	0	0	0	1	1	0	1	0
hsa-miR-26a	MIMAT0000082	NM_025182	KIAA1539	KIAA1539	0	0	0	0	0	0	1	1	0	1	1
hsa-miR-26a	MIMAT0000082	NM_021964	ZNF148	zinc finger protein 148	0	0	1	0	0	0	0	1	0	1	1
hsa-miR-26a	MIMAT0000082	NM_198157	UBE2L3	ubiquitin-conjugating enzyme E2L 3	0	0	0	0	0	0	1	1	0	1	1
hsa-miR-26a	MIMAT0000082	NM_183416	KIF1B	kinesin family member 1B	0	0	1	0	0	0	1	1	0	1	0
hsa-miR-26a	MIMAT0000082	NM_018374	TMEM106B	transmembrane protein 106B	0	0	1	1	0	0	0	1	0	1	0
hsa-miR-26a	MIMAT0000082	NM_207407	TMPRSS11F	transmembrane protease, serine 11F	0	0	0	0	0	0	1	1	0	1	1
hsa-miR-26a	MIMAT0000082	NM_197966	BID	BH3 interacting domain death agonist	0	0	1	1	0	0	0	1	0	1	0
hsa-miR-26a	MIMAT0000082	NM_198993	STAC2	SH3 and cysteine rich domain 2	0	0	0	0	0	0	1	1	0	1	1
hsa-miR-26a	MIMAT0000082	NM_022454	SOX17	SRY (sex determining region Y)-box 17	0	0	0	0	0	0	1	1	0	1	1
hsa-miR-26a	MIMAT0000082	NM_198173	GRHL3	grainyhead-like 3 (Drosophila)	0	0	0	1	0	0	1	1	0	1	0
hsa-miR-26a	MIMAT0000082	NM_183044	RNF6	ring finger protein (C3H2C3 type) 6	0	0	1	1	0	0	0	1	0	1	0
hsa-miR-26a	MIMAT0000082	NM_024913	C7orf58	chromosome 7 open reading frame 58	0	0	1	1	0	0	0	1	0	1	0
hsa-miR-26a	MIMAT0000082	NM_021148	ZNF273	zinc finger protein 273	0	0	1	1	0	0	0	1	0	1	0
hsa-miR-26a	MIMAT0000082	NM_018440	PAG1	phosphoprotein associated with glycosphingolipid microdomains 1	0	0	1	1	0	0	0	1	0	1	0
hsa-miR-26a	MIMAT0000082	NM_212539	PRKCD	protein kinase C, delta	0	0	0	1	0	0	1	1	0	1	0
hsa-miR-26a	MIMAT0000082	NM_022048	CSNK1G1	casein kinase 1, gamma 1	0	0	1	0	0	0	0	1	0	1	1
hsa-miR-26a	MIMAT0000082	NM_021648	TSPYL4	TSPY-like 4	0	0	1	1	0	0	0	1	0	1	0
hsa-miR-26a	MIMAT0000082	NM_018383	WDR33	WD repeat domain 33	0	0	1	1	0	0	0	1	0	1	0
hsa-miR-26a	MIMAT0000082	NM_022091	ASCC3	activating signal cointegrator 1 complex subunit 3	0	0	1	1	0	0	0	1	0	1	0
hsa-miR-26a	MIMAT0000082	NM_021252	RAB18	RAB18, member RAS oncogene family	0	0	1	1	0	0	0	1	0	1	0
hsa-miR-26a	MIMAT0000082	NM_018420	SLC22A15	solute carrier family 22, member 15	0	0	0	0	0	0	1	1	0	1	1
hsa-miR-26a	MIMAT0000082	NM_194292	SASS6	spindle assembly 6 homolog (C. elegans)	0	0	0	1	0	0	1	1	0	1	0
hsa-miR-26a	MIMAT0000082	NM_022133	SNX16	sorting nexin 16	0	0	1	1	0	0	0	1	0	1	0
hsa-miR-26a	MIMAT0000082	NM_212460	ARL4A	ADP-ribosylation factor-like 4A	0	0	1	1	0	0	0	1	0	1	0
hsa-miR-26a	MIMAT0000082	NM_022351	NECAB1	N-terminal EF-hand calcium binding protein 1	0	0	1	1	0	0	0	1	0	1	0
hsa-miR-26a	MIMAT0000082	NM_182767	SLC6A15	solute carrier family 6, member 15	0	0	1	0	0	0	1	1	0	1	0
hsa-miR-26a	MIMAT0000082	NM_197967	BID	BH3 interacting domain death agonist	0	0	1	1	0	0	0	1	0	1	0
hsa-miR-26a	MIMAT0000082	NM_198128	RNF138	ring finger protein 138	0	0	1	0	0	0	1	1	0	1	0
hsa-miR-26a	MIMAT0000082	NM_021183	RAP2C	RAP2C, member of RAS oncogene family	0	0	0	0	0	0	1	1	0	1	1
hsa-miR-26a	MIMAT0000082	NM_021140	UTX	ubiquitously transcribed tetratricopeptide repeat, X chromosome	0	0	0	0	0	0	1	1	0	1	1
hsa-miR-26a	MIMAT0000082	NM_203453	PPAPDC2	phosphatidic acid phosphatase type 2 domain containing 2	0	0	0	0	0	0	1	1	0	1	1
hsa-miR-26a	MIMAT0000082	NM_020762	SRGAP1	SLIT-ROBO Rho GTPase activating protein 1	0	0	0	0	0	0	1	1	0	1	1
hsa-miR-26a	MIMAT0000082	NM_203341	2015-09-01	15 kDa selenoprotein	0	0	1	1	0	0	0	1	0	1	0
hsa-miR-26a	MIMAT0000082	NM_019558	HOXD8	homeobox D8	0	0	0	0	0	0	1	1	0	1	1
hsa-miR-26a	MIMAT0000082	NM_020766	PCDH19	protocadherin 19	0	0	1	0	0	0	0	1	0	1	1
hsa-miR-26a	MIMAT0000082	NM_201629	TJP2	tight junction protein 2 (zona occludens 2)	0	0	1	1	0	0	0	1	0	1	0
hsa-miR-26a	MIMAT0000082	NM_020774	MIB1	mindbomb homolog 1 (Drosophila)	0	0	1	0	0	0	0	1	0	1	1
hsa-miR-26a	MIMAT0000082	NM_199483	C20orf24	chromosome 20 open reading frame 24	0	0	0	1	0	0	1	1	0	1	0
hsa-miR-26a	MIMAT0000082	NM_020784	TXNDC16	thioredoxin domain containing 16	0	0	1	1	0	0	0	1	0	1	0
hsa-miR-26a	MIMAT0000082	NM_019114	EPB41L4B	erythrocyte membrane protein band 4.1 like 4B	0	0	0	0	0	0	1	1	0	1	1
hsa-miR-26a	MIMAT0000082	NM_020748	INTS2	integrator complex subunit 2	0	0	1	1	0	0	0	1	0	1	0
hsa-miR-26a	MIMAT0000082	NM_019891	ERO1LB	ERO1-like beta (S. cerevisiae)	0	0	0	0	0	0	1	1	0	1	1
hsa-miR-26a	MIMAT0000082	NM_145259	ACVR1C	activin A receptor, type IC	0	0	0	0	0	0	1	1	0	1	1
hsa-miR-26a	MIMAT0000082	NM_203436	ASCL4	achaete-scute complex homolog 4 (Drosophila)	0	0	1	1	0	0	0	1	0	1	0
hsa-miR-26a	MIMAT0000082	NM_203504	G3BP2	GTPase activating protein (SH3 domain) binding protein 2	0	0	0	1	0	0	1	1	0	1	0
hsa-miR-26a	MIMAT0000082	NM_203411	TMEM88	transmembrane protein 88	0	0	0	0	0	0	1	1	0	1	1
hsa-miR-26a	MIMAT0000082	NM_020235	BBX	bobby sox homolog (Drosophila)	0	0	0	0	0	0	1	1	0	1	1
hsa-miR-26a	MIMAT0000082	NM_020382	SETD8	SET domain containing (lysine methyltransferase) 8	0	0	0	0	0	0	1	1	0	1	1
hsa-miR-26a	MIMAT0000082	NM_203399	STMN1	stathmin 1/oncoprotein 18	0	0	1	0	0	0	1	1	0	1	0
hsa-miR-26a	MIMAT0000082	NM_020456	C13orf1	chromosome 13 open reading frame 1	0	0	1	1	0	0	0	1	0	1	0
hsa-miR-26a	MIMAT0000082	NM_203382	AMACR	alpha-methylacyl-CoA racemase	0	0	1	1	0	0	0	1	0	1	0
hsa-miR-26a	MIMAT0000082	NM_203459	CAMSAP1L1	calmodulin regulated spectrin-associated protein 1-like 1	0	0	0	0	0	0	1	1	0	1	1
hsa-miR-26a	MIMAT0000082	NM_020824	ARHGAP21	Rho GTPase activating protein 21	0	0	0	0	0	0	1	1	0	1	1
hsa-miR-26a	MIMAT0000082	NM_020843	SCAPER	S phase cyclin A-associated protein in the ER	0	0	1	1	0	0	0	1	0	1	0
hsa-miR-26a	MIMAT0000082	NM_206909	PSD3	pleckstrin and Sec7 domain containing 3	0	0	0	1	0	0	1	1	0	1	0
hsa-miR-26a	MIMAT0000082	NM_206933	USH2A	Usher syndrome 2A (autosomal recessive, mild)	0	0	1	1	0	0	0	1	0	1	0
hsa-miR-26a	MIMAT0000082	NM_198321	GALNT10	UDP-N-acetyl-alpha-D-galactosamine:polypeptide N-acetylgalactosaminyltransferase 10 (GalNAc-T10)	0	0	1	0	0	0	1	1	0	1	0
hsa-miR-26a	MIMAT0000082	NM_198320	CPM	carboxypeptidase M	0	0	1	1	0	0	0	1	0	1	0
hsa-miR-26a	MIMAT0000082	NM_020983	ADCY6	adenylate cyclase 6	0	0	1	0	0	0	1	1	0	1	0
hsa-miR-26a	MIMAT0000082	NM_021083	XK	X-linked Kx blood group (McLeod syndrome)	0	0	1	1	0	0	0	1	0	1	0
hsa-miR-26a	MIMAT0000082	NM_207404	ZNF662	zinc finger protein 662	0	0	1	1	0	0	0	1	0	1	0
hsa-miR-26a	MIMAT0000082	NM_198269	HIPK1	homeodomain interacting protein kinase 1	0	0	1	0	0	0	1	1	0	1	0
hsa-miR-26a	MIMAT0000082	NM_018834	MATR3	matrin 3	0	0	0	0	0	0	1	1	0	1	1
hsa-miR-26a	MIMAT0000082	NM_020919	ALS2	amyotrophic lateral sclerosis 2 (juvenile)	0	0	0	0	0	0	1	1	0	1	1
hsa-miR-26a	MIMAT0000082	NM_206857	RTN1	reticulon 1	0	0	1	0	0	0	1	1	0	1	0
hsa-miR-26a	MIMAT0000082	NM_199190	LARP4	La ribonucleoprotein domain family, member 4	0	0	1	1	0	0	0	1	0	1	0
hsa-miR-26a	MIMAT0000082	NM_020854	KIAA1468	KIAA1468	0	0	0	0	0	0	1	1	0	1	1
hsa-miR-26a	MIMAT0000082	NM_020858	SEMA6D	sema domain, transmembrane domain (TM), and cytoplasmic domain, (semaphorin) 6D	0	0	0	1	0	0	1	1	0	1	0
hsa-miR-26a	MIMAT0000082	NM_199188	LARP4	La ribonucleoprotein domain family, member 4	0	0	1	1	0	0	0	1	0	1	0
hsa-miR-26a	MIMAT0000082	NM_019080	NDFIP2	Nedd4 family interacting protein 2	0	0	0	1	0	0	0	1	0	1	1
hsa-miR-26a	MIMAT0000082	NM_199141	CARM1	coactivator-associated arginine methyltransferase 1	0	0	0	0	0	0	1	1	0	1	1
hsa-miR-26a	MIMAT0000082	NM_199054	MKNK2	MAP kinase interacting serine/threonine kinase 2	0	0	1	0	0	0	0	1	0	1	1
hsa-miR-26a	MIMAT0000082	NM_198329	UBA5	ubiquitin-like modifier activating enzyme 5	0	0	1	1	0	0	0	1	0	1	0
hsa-miR-26a	MIMAT0000082	NM_020870	SH3RF1	SH3 domain containing ring finger 1	0	0	0	0	0	0	1	1	0	1	1
hsa-miR-26a	MIMAT0000082	NM_198268	HIPK1	homeodomain interacting protein kinase 1	0	0	1	0	0	0	1	1	0	1	0
hsa-miR-26a	MIMAT0000082	NM_022456	RAB3IP	RAB3A interacting protein (rabin3)	0	0	1	1	0	0	0	1	0	1	0
hsa-miR-26a	MIMAT0000082	NM_152888	COL22A1	collagen, type XXII, alpha 1	0	0	0	0	0	0	1	1	0	1	1
hsa-miR-26a	MIMAT0000082	NM_032236	USP48	ubiquitin specific peptidase 48	0	0	0	0	0	0	1	1	0	1	1
hsa-miR-26a	MIMAT0000082	NM_152522	ARL6IP6	ADP-ribosylation-like factor 6 interacting protein 6	0	0	0	0	0	0	1	1	0	1	1
hsa-miR-26a	MIMAT0000082	NM_152520	ZNF385B	zinc finger protein 385B	0	0	0	0	0	0	1	1	0	1	1
hsa-miR-26a	MIMAT0000082	NM_032439	PHYHIPL	phytanoyl-CoA 2-hydroxylase interacting protein-like	0	0	1	1	0	0	0	1	0	1	0
hsa-miR-26a	MIMAT0000082	NM_152418	WDR21C	WD repeat domain 21C	0	0	1	1	0	0	0	1	0	1	0
hsa-miR-26a	MIMAT0000082	NM_032701	SUV420H2	suppressor of variegation 4-20 homolog 2 (Drosophila)	0	0	0	0	0	0	1	1	0	1	1
hsa-miR-26a	MIMAT0000082	NM_032787	GPR128	G protein-coupled receptor 128	0	0	1	1	0	0	0	1	0	1	0
hsa-miR-26a	MIMAT0000082	NM_152409	C5orf24	chromosome 5 open reading frame 24	0	0	1	1	0	0	0	1	0	1	0
hsa-miR-26a	MIMAT0000082	NM_152387	KCTD18	potassium channel tetramerisation domain containing 18	0	0	0	0	0	0	1	1	0	1	1
hsa-miR-26a	MIMAT0000082	NM_032808	LINGO1	leucine rich repeat and Ig domain containing 1	0	0	0	0	0	0	1	1	0	1	1
hsa-miR-26a	MIMAT0000082	NM_152300	DDX52	DEAD (Asp-Glu-Ala-Asp) box polypeptide 52	0	0	1	1	0	0	0	1	0	1	0
hsa-miR-26a	MIMAT0000082	NM_033020	TRIM33	tripartite motif-containing 33	0	0	1	1	0	0	0	1	0	1	0
hsa-miR-26a	MIMAT0000082	NM_032221	CHD6	chromodomain helicase DNA binding protein 6	0	0	0	0	0	0	1	1	0	1	1
hsa-miR-26a	MIMAT0000082	NM_152551	C6orf151	chromosome 6 open reading frame 151	0	0	1	1	0	0	0	1	0	1	0
hsa-miR-26a	MIMAT0000082	NM_152837	SNX16	sorting nexin 16	0	0	1	1	0	0	0	1	0	1	0
hsa-miR-26a	MIMAT0000082	NM_030954	RNF170	ring finger protein 170	0	0	0	0	0	0	1	1	0	1	1
hsa-miR-26a	MIMAT0000082	NM_152836	SNX16	sorting nexin 16	0	0	1	1	0	0	0	1	0	1	0
hsa-miR-26a	MIMAT0000082	NM_152758	YTHDF3	YTH domain family, member 3	0	0	1	0	0	0	0	1	0	1	1
hsa-miR-26a	MIMAT0000082	NM_031435	THAP2	THAP domain containing, apoptosis associated protein 2	0	0	1	1	0	0	0	1	0	1	0
hsa-miR-26a	MIMAT0000082	NM_152682	RWDD4A	RWD domain containing 4A	0	0	0	0	0	0	1	1	0	1	1
hsa-miR-26a	MIMAT0000082	NM_152641	ARID2	AT rich interactive domain 2 (ARID, RFX-like)	0	0	1	0	0	0	0	1	0	1	1
hsa-miR-26a	MIMAT0000082	NM_031892	SH3KBP1	SH3-domain kinase binding protein 1	0	0	0	0	0	0	1	1	0	1	1
hsa-miR-26a	MIMAT0000082	NM_152622	MIER3	mesoderm induction early response 1, family member 3	0	0	1	0	0	0	0	1	0	1	1
hsa-miR-26a	MIMAT0000082	NM_032047	B3GNT5	UDP-GlcNAc:betaGal beta-1,3-N-acetylglucosaminyltransferase 5	0	0	1	1	0	0	0	1	0	1	0
hsa-miR-26a	MIMAT0000082	NM_032217	ANKRD17	ankyrin repeat domain 17	0	0	0	0	0	0	1	1	0	1	1
hsa-miR-26a	MIMAT0000082	NM_152608	C1orf55	chromosome 1 open reading frame 55	0	0	1	1	0	0	0	1	0	1	0
hsa-miR-26a	MIMAT0000082	NM_152277	UBTD2	ubiquitin domain containing 2	0	0	1	0	0	0	0	1	0	1	1
hsa-miR-26a	MIMAT0000082	NM_147191	MMP21	matrix metallopeptidase 21	0	0	1	1	0	0	0	1	0	1	0
hsa-miR-26a	MIMAT0000082	NM_147156	SGMS1	sphingomyelin synthase 1	0	0	0	0	0	0	1	1	0	1	1
hsa-miR-26a	MIMAT0000082	NM_144732	HNRNPUL1	heterogeneous nuclear ribonucleoprotein U-like 1	0	0	1	0	0	0	1	1	0	1	0
hsa-miR-26a	MIMAT0000082	NM_144599	NIPA1	non imprinted in Prader-Willi/Angelman syndrome 1	0	0	1	1	0	0	0	1	0	1	0
hsa-miR-26a	MIMAT0000082	NM_139321	ATRN	attractin	0	0	1	1	0	0	0	1	0	1	0
hsa-miR-26a	MIMAT0000082	NM_139242	MTFMT	mitochondrial methionyl-tRNA formyltransferase	0	0	1	1	0	0	0	1	0	1	0
hsa-miR-26a	MIMAT0000082	NM_101395	DYRK1A	dual-specificity tyrosine-(Y)-phosphorylation regulated kinase 1A	0	0	0	0	0	0	1	1	0	1	1
hsa-miR-26a	MIMAT0000082	NM_130439	MXI1	MAX interactor 1	0	0	1	0	0	0	1	1	0	1	0
hsa-miR-26a	MIMAT0000082	NM_138619	GGA3	golgi associated, gamma adaptin ear containing, ARF binding protein 3	0	0	1	0	0	0	1	1	0	1	0
hsa-miR-26a	MIMAT0000082	NM_133264	WIPF2	WAS/WASL interacting protein family, member 2	0	0	1	0	0	0	0	1	0	1	1
hsa-miR-26a	MIMAT0000082	NM_138494	ZNF655	zinc finger protein 655	0	0	1	0	0	0	1	1	0	1	0
hsa-miR-26a	MIMAT0000082	NM_138292	ATM	ataxia telangiectasia mutated	0	0	0	1	0	0	1	1	0	1	0
hsa-miR-26a	MIMAT0000082	NM_133433	NIPBL	Nipped-B homolog (Drosophila)	0	0	0	0	0	0	1	1	0	1	1
hsa-miR-26a	MIMAT0000082	NM_133473	ZNF431	zinc finger protein 431	0	0	1	1	0	0	0	1	0	1	0
hsa-miR-26a	MIMAT0000082	NM_144949	SOCS5	suppressor of cytokine signaling 5	0	0	1	0	0	0	1	1	0	1	0
hsa-miR-26a	MIMAT0000082	NM_080685	PTPN13	protein tyrosine phosphatase, non-receptor type 13 (APO-1/CD95 (Fas)-associated phosphatase)	0	0	0	1	0	0	1	1	0	1	0
hsa-miR-26a	MIMAT0000082	NM_033272	KCNH7	potassium voltage-gated channel, subfamily H (eag-related), member 7	0	0	0	0	0	0	1	1	0	1	1
hsa-miR-26a	MIMAT0000082	NM_145279	MOBKL2C	MOB1, Mps One Binder kinase activator-like 2C (yeast)	0	0	0	0	0	0	1	1	0	1	1
hsa-miR-26a	MIMAT0000082	NM_033396	TNKS1BP1	tankyrase 1 binding protein 1, 182kDa	0	0	0	0	0	0	1	1	0	1	1
hsa-miR-26a	MIMAT0000082	NM_033426	KIAA1737	KIAA1737	0	0	1	1	0	0	0	1	0	1	0
hsa-miR-26a	MIMAT0000082	NM_145175	FAM84A	family with sequence similarity 84, member A	0	0	0	0	0	0	1	1	0	1	1
hsa-miR-26a	MIMAT0000082	NM_052937	PCMTD1	protein-L-isoaspartate (D-aspartate) O-methyltransferase domain containing 1	0	0	1	1	0	0	0	1	0	1	0
hsa-miR-26a	MIMAT0000082	NM_145037	FAM55C	family with sequence similarity 55, member C	0	0	1	1	0	0	0	1	0	1	0
hsa-miR-26a	MIMAT0000082	NM_080664	C14orf126	chromosome 14 open reading frame 126	0	0	1	1	0	0	0	1	0	1	0
hsa-miR-26a	MIMAT0000082	NM_145006	SUSD3	sushi domain containing 3	0	0	1	1	0	0	0	1	0	1	0
hsa-miR-26a	MIMAT0000082	NM_144982	CCDC131	coiled-coil domain containing 131	0	0	0	0	0	0	1	1	0	1	1
hsa-miR-26a	MIMAT0000082	NM_144979	RBM46	RNA binding motif protein 46	0	0	1	1	0	0	0	1	0	1	0
hsa-miR-26a	MIMAT0000082	NM_080684	PTPN13	protein tyrosine phosphatase, non-receptor type 13 (APO-1/CD95 (Fas)-associated phosphatase)	0	0	0	1	0	0	1	1	0	1	0
hsa-miR-26a	MIMAT0000082	NM_133638	ADAMTS19	ADAM metallopeptidase with thrombospondin type 1 motif, 19	0	0	1	0	0	0	0	1	0	1	1
hsa-miR-26a	MIMAT0000082	NM_030627	CPEB4	cytoplasmic polyadenylation element binding protein 4	0	0	0	0	0	0	1	1	0	1	1
hsa-miR-26a	MIMAT0000082	NM_022461	AZI2	5-azacytidine induced 2	0	0	0	0	0	0	1	1	0	1	1
hsa-miR-26a	MIMAT0000082	NM_175876	EXOC8	exocyst complex component 8	0	0	1	1	0	0	0	1	0	1	0
hsa-miR-26a	MIMAT0000082	NM_175625	RAB3IP	RAB3A interacting protein (rabin3)	0	0	1	1	0	0	0	1	0	1	0
hsa-miR-26a	MIMAT0000082	NM_175624	RAB3IP	RAB3A interacting protein (rabin3)	0	0	1	1	0	0	0	1	0	1	0
hsa-miR-26a	MIMAT0000082	NM_175623	RAB3IP	RAB3A interacting protein (rabin3)	0	0	1	1	0	0	0	1	0	1	0
hsa-miR-26a	MIMAT0000082	NM_022841	RFXDC2	regulatory factor X domain containing 2	0	0	0	1	0	0	0	1	0	1	1
hsa-miR-26a	MIMAT0000082	NM_174916	UBR1	ubiquitin protein ligase E3 component n-recognin 1	0	0	1	1	0	0	0	1	0	1	0
hsa-miR-26a	MIMAT0000082	NM_022845	CBFB	core-binding factor, beta subunit	0	0	1	0	0	0	1	1	0	1	0
hsa-miR-26a	MIMAT0000082	NM_173848	RALYL	RALY RNA binding protein-like	0	0	1	1	0	0	0	1	0	1	0
hsa-miR-26a	MIMAT0000082	NM_173827	COX18	COX18 cytochrome c oxidase assembly homolog (S. cerevisiae)	0	0	1	1	0	0	0	1	0	1	0
hsa-miR-26a	MIMAT0000082	NM_022893	BCL11A	B-cell CLL/lymphoma 11A (zinc finger protein)	0	0	0	0	0	0	1	1	0	1	1
hsa-miR-26a	MIMAT0000082	NM_022901	LRRC19	leucine rich repeat containing 19	0	0	1	1	0	0	0	1	0	1	0
hsa-miR-26a	MIMAT0000082	NM_022918	TMEM135	transmembrane protein 135	0	0	0	0	0	0	1	1	0	1	1
hsa-miR-26a	MIMAT0000082	NM_178135	HSD17B13	hydroxysteroid (17-beta) dehydrogenase 13	0	0	1	1	0	0	0	1	0	1	0
hsa-miR-26a	MIMAT0000082	NM_178445	CCRL1	chemokine (C-C motif) receptor-like 1	0	0	1	1	0	0	0	1	0	1	0
hsa-miR-26a	MIMAT0000082	NM_182557	BCL9L	B-cell CLL/lymphoma 9-like	0	0	0	0	0	0	1	1	0	1	1
hsa-miR-26a	MIMAT0000082	NM_182485	CPEB2	cytoplasmic polyadenylation element binding protein 2	0	0	0	0	0	0	1	1	0	1	1
hsa-miR-26a	MIMAT0000082	NM_181789	GLDN	gliomedin	0	0	1	1	0	0	0	1	0	1	0
hsa-miR-26a	MIMAT0000082	NM_022719	DGCR14	DiGeorge syndrome critical region gene 14	0	0	1	0	0	0	0	1	0	1	1
hsa-miR-26a	MIMAT0000082	NM_022730	COPS7B	COP9 constitutive photomorphogenic homolog subunit 7B (Arabidopsis)	0	0	0	0	0	0	1	1	0	1	1
hsa-miR-26a	MIMAT0000082	NM_181783	TMTC3	transmembrane and tetratricopeptide repeat containing 3	0	0	1	0	0	0	0	1	0	1	1
hsa-miR-26a	MIMAT0000082	NM_181672	OGT	O-linked N-acetylglucosamine (GlcNAc) transferase (UDP-N-acetylglucosamine:polypeptide-N-acetylglucosaminyl transferase)	0	0	0	0	0	0	1	1	0	1	1
hsa-miR-26a	MIMAT0000082	NM_022733	SMAP2	stromal membrane-associated GTPase-activating protein 2	0	0	0	0	0	0	1	1	0	1	1
hsa-miR-26a	MIMAT0000082	NM_022740	HIPK2	homeodomain interacting protein kinase 2	0	0	0	0	0	0	1	1	0	1	1
hsa-miR-26a	MIMAT0000082	NM_178558	ZNF680	zinc finger protein 680	0	0	1	1	0	0	0	1	0	1	0
hsa-miR-26a	MIMAT0000082	NM_022755	IPPK	inositol 1,3,4,5,6-pentakisphosphate 2-kinase	0	0	1	0	0	0	0	1	0	1	1
hsa-miR-26a	MIMAT0000082	NM_022771	TBC1D15	TBC1 domain family, member 15	0	0	1	1	0	0	0	1	0	1	0
hsa-miR-26a	MIMAT0000082	NM_024080	TRPM8	transient receptor potential cation channel, subfamily M, member 8	0	0	1	1	0	0	0	1	0	1	0
hsa-miR-26a	MIMAT0000082	NM_173797	PAPD4	PAP associated domain containing 4	0	0	0	0	0	0	1	1	0	1	1
hsa-miR-26a	MIMAT0000082	NM_173631	ZNF547	zinc finger protein 547	0	0	1	1	0	0	0	1	0	1	0
hsa-miR-26a	MIMAT0000082	NM_024818	UBA5	ubiquitin-like modifier activating enzyme 5	0	0	1	1	0	0	0	1	0	1	0
hsa-miR-26a	MIMAT0000082	NM_153647	SLC24A4	solute carrier family 24 (sodium/potassium/calcium exchanger), member 4	0	0	1	0	0	0	1	1	0	1	0
hsa-miR-26a	MIMAT0000082	NM_024921	POF1B	premature ovarian failure, 1B	0	0	1	0	0	0	0	1	0	1	1
hsa-miR-26a	MIMAT0000082	NM_024993	LRRTM4	leucine rich repeat transmembrane neuronal 4	0	0	0	0	0	0	1	1	0	1	1
hsa-miR-26a	MIMAT0000082	NM_153645	NUP50	nucleoporin 50kDa	0	0	1	1	0	0	0	1	0	1	0
hsa-miR-26a	MIMAT0000082	NM_025179	PLXNA2	plexin A2	0	0	1	0	0	0	0	1	0	1	1
hsa-miR-26a	MIMAT0000082	NM_153633	HOXC4	homeobox C4	0	0	1	1	0	0	0	1	0	1	0
hsa-miR-26a	MIMAT0000082	NM_025189	ZNF430	zinc finger protein 430	0	0	1	1	0	0	0	1	0	1	0
hsa-miR-26a	MIMAT0000082	NM_153367	C10orf56	chromosome 10 open reading frame 56	0	0	0	0	0	0	1	1	0	1	1
hsa-miR-26a	MIMAT0000082	NM_000016	ACADM	acyl-Coenzyme A dehydrogenase, C-4 to C-12 straight chain	0	0	1	1	0	0	0	1	0	1	0
hsa-miR-26a	MIMAT0000082	NM_153000	APCDD1	adenomatosis polyposis coli down-regulated 1	0	0	0	0	0	0	1	1	0	1	1
hsa-miR-26a	MIMAT0000082	NM_080683	PTPN13	protein tyrosine phosphatase, non-receptor type 13 (APO-1/CD95 (Fas)-associated phosphatase)	0	0	0	1	0	0	1	1	0	1	0
hsa-miR-26a	MIMAT0000082	NM_024755	SLTM	SAFB-like, transcription modulator	0	0	1	1	0	0	0	1	0	1	0
hsa-miR-26a	MIMAT0000082	NM_153694	SYCP3	synaptonemal complex protein 3	0	0	0	0	0	0	1	1	0	1	1
hsa-miR-26a	MIMAT0000082	NM_173547	TRIM65	tripartite motif-containing 65	0	0	1	1	0	0	0	1	0	1	0
hsa-miR-26a	MIMAT0000082	NM_024297	PHF23	PHD finger protein 23	0	0	0	0	0	0	1	1	0	1	1
hsa-miR-26a	MIMAT0000082	NM_173536	GABRG1	gamma-aminobutyric acid (GABA) A receptor, gamma 1	0	0	1	1	0	0	0	1	0	1	0
hsa-miR-26a	MIMAT0000082	NM_024318	LILRA6	leukocyte immunoglobulin-like receptor, subfamily A (with TM domain), member 6	0	0	1	1	0	0	0	1	0	1	0
hsa-miR-26a	MIMAT0000082	NM_024331	C20orf121	chromosome 20 open reading frame 121	0	0	1	1	0	0	0	1	0	1	0
hsa-miR-26a	MIMAT0000082	NM_024512	LRRC2	leucine rich repeat containing 2	0	0	1	1	0	0	0	1	0	1	0
hsa-miR-26a	MIMAT0000082	NM_172163	KCNQ4	potassium voltage-gated channel, KQT-like subfamily, member 4	0	0	1	0	0	0	1	1	0	1	0
hsa-miR-26a	MIMAT0000082	NM_024539	RNF128	ring finger protein 128	0	0	0	0	0	0	1	1	0	1	1
hsa-miR-26a	MIMAT0000082	NM_024565	CCNJL	cyclin J-like	0	0	1	0	0	0	0	1	0	1	1
hsa-miR-26a	MIMAT0000082	NM_024595	C1orf108	chromosome 1 open reading frame 108	0	0	0	0	0	0	1	1	0	1	1
hsa-miR-26a	MIMAT0000082	NM_024602	HECTD3	HECT domain containing 3	0	0	0	0	0	0	1	1	0	1	1
hsa-miR-26a	MIMAT0000082	NM_170740	ALDH5A1	aldehyde dehydrogenase 5 family, member A1 (succinate-semialdehyde dehydrogenase)	0	0	0	1	0	0	1	1	0	1	0
hsa-miR-26a	MIMAT0000082	NM_152998	EZH2	enhancer of zeste homolog 2 (Drosophila)	0	0	1	0	0	0	1	1	0	1	0
hsa-miR-26a	MIMAT0000082	NM_002577	PAK2	p21 protein (Cdc42/Rac)-activated kinase 2	0	0	0	0	0	0	1	1	0	1	1
hsa-miR-26a	MIMAT0000082	NM_002266	KPNA2	karyopherin alpha 2 (RAG cohort 1, importin alpha 1)	0	0	0	1	0	0	1	0	0	1	1
hsa-miR-26a	MIMAT0000082	NM_002222	ITPR1	inositol 1,4,5-triphosphate receptor, type 1	0	0	0	0	0	0	1	1	0	1	1
hsa-miR-26a	MIMAT0000082	NM_002205	ITGA5	integrin, alpha 5 (fibronectin receptor, alpha polypeptide)	0	0	0	0	0	0	1	1	0	1	1
hsa-miR-26a	MIMAT0000082	NM_002131	HMGA1	high mobility group AT-hook 1	0	0	1	0	0	0	0	1	0	1	1
hsa-miR-26a	MIMAT0000082	NM_002092	GRSF1	G-rich RNA sequence binding factor 1	0	0	0	0	0	0	1	1	0	1	1
hsa-miR-26a	MIMAT0000082	NM_002053	GBP1	guanylate binding protein 1, interferon-inducible, 67kDa	0	0	1	1	0	0	0	1	0	1	0
hsa-miR-26a	MIMAT0000082	NM_001995	ACSL1	acyl-CoA synthetase long-chain family member 1	0	0	1	1	0	0	0	1	0	1	0
hsa-miR-26a	MIMAT0000082	NM_001901	CTGF	connective tissue growth factor	0	0	0	0	0	0	1	1	0	1	1
hsa-miR-26a	MIMAT0000082	NM_002267	KPNA3	karyopherin alpha 3 (importin alpha 4)	0	0	0	0	0	0	1	1	0	1	1
hsa-miR-26a	MIMAT0000082	NM_002270	TNPO1	transportin 1	0	0	1	0	0	0	0	1	0	1	1
hsa-miR-26a	MIMAT0000082	NM_002576	PAK1	p21 protein (Cdc42/Rac)-activated kinase 1	0	0	1	1	0	0	0	1	0	1	0
hsa-miR-26a	MIMAT0000082	NM_002515	NOVA1	neuro-oncological ventral antigen 1	0	0	0	0	0	0	1	1	0	1	1
hsa-miR-26a	MIMAT0000082	NM_002508	NID1	nidogen 1	0	0	1	1	0	0	0	1	0	1	0
hsa-miR-26a	MIMAT0000082	NM_002439	MSH3	mutS homolog 3 (E. coli)	0	0	1	1	0	0	0	1	0	1	0
hsa-miR-26a	MIMAT0000082	NM_002373	MAP1A	microtubule-associated protein 1A	0	0	0	0	0	0	1	1	0	1	1
hsa-miR-26a	MIMAT0000082	NM_002372	MAN2A1	mannosidase, alpha, class 2A, member 1	0	0	0	0	0	0	1	1	0	1	1
hsa-miR-26a	MIMAT0000082	NM_002354	TACSTD1	tumor-associated calcium signal transducer 1	0	0	1	1	0	0	0	1	0	1	0
hsa-miR-26a	MIMAT0000082	NM_002309	LIF	leukemia inhibitory factor (cholinergic differentiation factor)	0	0	1	0	0	0	0	1	0	1	1
hsa-miR-26a	MIMAT0000082	NM_001874	CPM	carboxypeptidase M	0	0	1	1	0	0	0	1	0	1	0
hsa-miR-26a	MIMAT0000082	NM_001827	CKS2	CDC28 protein kinase regulatory subunit 2	0	0	1	1	0	0	0	1	0	1	0
hsa-miR-26a	MIMAT0000082	NM_001806	CEBPG	CCAAT/enhancer binding protein (C/EBP), gamma	0	0	0	0	0	0	1	1	0	1	1
hsa-miR-26a	MIMAT0000082	NM_001500	GMDS	GDP-mannose 4,6-dehydratase	0	0	1	1	0	0	0	1	0	1	0
hsa-miR-26a	MIMAT0000082	NM_001497	B4GALT1	UDP-Gal:betaGlcNAc beta 1,4- galactosyltransferase, polypeptide 1	0	0	0	0	0	0	1	1	0	1	1
hsa-miR-26a	MIMAT0000082	NM_001461	FMO5	flavin containing monooxygenase 5	0	0	1	1	0	0	0	1	0	1	0
hsa-miR-26a	MIMAT0000082	NM_001448	GPC4	glypican 4	0	0	1	1	0	0	0	1	0	1	0
hsa-miR-26a	MIMAT0000082	NM_001438	ESRRG	estrogen-related receptor gamma	0	0	0	0	0	0	1	1	0	1	1
hsa-miR-26a	MIMAT0000082	NM_001432	EREG	epiregulin	0	0	1	1	0	0	0	1	0	1	0
hsa-miR-26a	MIMAT0000082	NM_001430	EPAS1	endothelial PAS domain protein 1	0	0	0	0	0	0	1	1	0	1	1
hsa-miR-26a	MIMAT0000082	NM_001429	EP300	E1A binding protein p300	0	0	0	0	0	0	1	1	0	1	1
hsa-miR-26a	MIMAT0000082	NM_001521	GTF3C2	general transcription factor IIIC, polypeptide 2, beta 110kDa	0	0	1	0	0	0	1	1	0	1	0
hsa-miR-26a	MIMAT0000082	NM_001609	ACADSB	acyl-Coenzyme A dehydrogenase, short/branched chain	0	0	1	0	0	0	0	1	0	1	1
hsa-miR-26a	MIMAT0000082	NM_001797	CDH11	cadherin 11, type 2, OB-cadherin (osteoblast)	0	0	0	0	0	0	1	1	0	1	1
hsa-miR-26a	MIMAT0000082	NM_001794	CDH4	cadherin 4, type 1, R-cadherin (retinal)	0	0	0	0	0	0	1	1	0	1	1
hsa-miR-26a	MIMAT0000082	NM_001792	CDH2	cadherin 2, type 1, N-cadherin (neuronal)	0	0	0	0	0	0	1	1	0	1	1
hsa-miR-26a	MIMAT0000082	NM_001707	BCL7B	B-cell CLL/lymphoma 7B	0	0	1	0	0	0	1	1	0	1	0
hsa-miR-26a	MIMAT0000082	NM_001706	BCL6	B-cell CLL/lymphoma 6 (zinc finger protein 51)	0	0	0	0	0	0	1	1	0	1	1
hsa-miR-26a	MIMAT0000082	NM_001658	ARF1	ADP-ribosylation factor 1	0	0	1	0	0	0	1	1	0	1	0
hsa-miR-26a	MIMAT0000082	NM_001635	AMPH	amphiphysin	0	0	0	0	0	0	1	1	0	1	1
hsa-miR-26a	MIMAT0000082	NM_001619	ADRBK1	adrenergic, beta, receptor kinase 1	0	0	0	0	0	0	1	1	0	1	1
hsa-miR-26a	MIMAT0000082	NM_001420	ELAVL3	ELAV (embryonic lethal, abnormal vision, Drosophila)-like 3 (Hu antigen C)	0	0	0	0	0	0	1	1	0	1	1
hsa-miR-26a	MIMAT0000082	NM_004370	COL12A1	collagen, type XII, alpha 1	0	0	0	0	0	0	1	1	0	1	1
hsa-miR-26a	MIMAT0000082	NM_004124	GMFB	glia maturation factor, beta	0	0	0	1	0	0	0	1	0	1	1
hsa-miR-26a	MIMAT0000082	NM_004094	EIF2S1	eukaryotic translation initiation factor 2, subunit 1 alpha, 35kDa	0	0	1	1	0	0	0	1	0	1	0
hsa-miR-26a	MIMAT0000082	NM_003980	MAP7	microtubule-associated protein 7	0	0	1	1	0	0	0	1	0	1	0
hsa-miR-26a	MIMAT0000082	NM_003902	FUBP1	far upstream element (FUSE) binding protein 1	0	0	1	1	0	0	0	1	0	1	0
hsa-miR-26a	MIMAT0000082	NM_003838	FPGT	fucose-1-phosphate guanylyltransferase	0	0	1	1	0	0	0	1	0	1	0
hsa-miR-26a	MIMAT0000082	NM_003787	NOL4	nucleolar protein 4	0	0	0	0	0	0	1	1	0	1	1
hsa-miR-26a	MIMAT0000082	NM_003764	STX11	syntaxin 11	0	0	1	1	0	0	0	1	0	1	0
hsa-miR-26a	MIMAT0000082	NM_003747	TNKS	tankyrase, TRF1-interacting ankyrin-related ADP-ribose polymerase	0	0	1	1	0	0	0	1	0	1	0
hsa-miR-26a	MIMAT0000082	NM_004180	TANK	TRAF family member-associated NFKB activator	0	0	1	1	0	0	0	1	0	1	0
hsa-miR-26a	MIMAT0000082	NM_004225	MFHAS1	malignant fibrous histiocytoma amplified sequence 1	0	0	1	0	0	0	0	1	0	1	1
hsa-miR-26a	MIMAT0000082	NM_004289	NFE2L3	nuclear factor (erythroid-derived 2)-like 3	0	0	1	0	0	0	1	1	0	1	0
hsa-miR-26a	MIMAT0000082	NM_004267	CHST2	carbohydrate (N-acetylglucosamine-6-O) sulfotransferase 2	0	0	0	0	0	0	1	1	0	1	1
hsa-miR-26a	MIMAT0000082	NM_004261	2015-09-01	15 kDa selenoprotein	0	0	1	1	0	0	0	1	0	1	0
hsa-miR-26a	MIMAT0000082	NM_004255	COX5A	cytochrome c oxidase subunit Va	0	0	0	0	0	0	1	1	0	1	1
hsa-miR-26a	MIMAT0000082	NM_004236	COPS2	COP9 constitutive photomorphogenic homolog subunit 2 (Arabidopsis)	0	0	0	0	0	0	1	1	0	1	1
hsa-miR-26a	MIMAT0000082	NM_004235	KLF4	Kruppel-like factor 4 (gut)	0	0	0	0	0	0	1	1	0	1	1
hsa-miR-26a	MIMAT0000082	NM_004234	ZNF235	zinc finger protein 235	0	0	1	1	0	0	0	1	0	1	0
hsa-miR-26a	MIMAT0000082	NM_004232	SOCS6	suppressor of cytokine signaling 6	0	0	1	0	0	0	0	1	0	1	1
hsa-miR-26a	MIMAT0000082	NM_003718	CDC2L5	cell division cycle 2-like 5 (cholinesterase-related cell division controller)	0	0	0	0	0	0	1	1	0	1	1
hsa-miR-26a	MIMAT0000082	NM_003629	PIK3R3	phosphoinositide-3-kinase, regulatory subunit 3 (gamma)	0	0	0	0	0	0	1	1	0	1	1
hsa-miR-26a	MIMAT0000082	NM_003615	SLC4A7	solute carrier family 4, sodium bicarbonate cotransporter, member 7	0	0	1	0	0	0	0	1	0	1	1
hsa-miR-26a	MIMAT0000082	NM_003201	TFAM	transcription factor A, mitochondrial	0	0	1	1	0	0	0	1	0	1	0
hsa-miR-26a	MIMAT0000082	NM_003043	SLC6A6	solute carrier family 6 (neurotransmitter transporter, taurine), member 6	0	0	0	0	0	0	1	1	0	1	1
hsa-miR-26a	MIMAT0000082	NM_002958	RYK	RYK receptor-like tyrosine kinase	0	0	1	0	0	0	1	1	0	1	0
hsa-miR-26a	MIMAT0000082	NM_002940	ABCE1	ATP-binding cassette, sub-family E (OABP), member 1	0	0	1	1	0	0	0	1	0	1	0
hsa-miR-26a	MIMAT0000082	NM_002902	RCN2	reticulocalbin 2, EF-hand calcium binding domain	0	0	0	0	0	0	1	1	0	1	1
hsa-miR-26a	MIMAT0000082	NM_002901	RCN1	reticulocalbin 1, EF-hand calcium binding domain	0	0	0	0	0	0	1	1	0	1	1
hsa-miR-26a	MIMAT0000082	NM_002822	TWF1	twinfilin, actin-binding protein, homolog 1 (Drosophila)	0	0	0	1	0	0	0	1	0	1	1
hsa-miR-26a	MIMAT0000082	NM_002748	MAPK6	mitogen-activated protein kinase 6	0	0	0	1	0	0	0	1	0	1	1
hsa-miR-26a	MIMAT0000082	NM_003205	TCF12	transcription factor 12 (HTF4, helix-loop-helix transcription factors 4)	0	0	0	0	0	0	1	1	0	1	1
hsa-miR-26a	MIMAT0000082	NM_003222	TFAP2C	transcription factor AP-2 gamma (activating enhancer binding protein 2 gamma)	0	0	0	0	0	0	1	1	0	1	1
hsa-miR-26a	MIMAT0000082	NM_003474	ADAM12	ADAM metallopeptidase domain 12 (meltrin alpha)	0	0	0	0	0	0	1	1	0	1	1
hsa-miR-26a	MIMAT0000082	NM_003463	PTP4A1	protein tyrosine phosphatase type IVA, member 1	0	0	0	0	0	0	1	1	0	1	1
hsa-miR-26a	MIMAT0000082	NM_003421	ZNF37A	zinc finger protein 37A	0	0	1	1	0	0	0	1	0	1	0
hsa-miR-26a	MIMAT0000082	NM_003392	WNT5A	wingless-type MMTV integration site family, member 5A	0	0	0	0	0	0	1	1	0	1	1
hsa-miR-26a	MIMAT0000082	NM_003390	WEE1	WEE1 homolog (S. pombe)	0	0	1	1	0	0	0	1	0	1	0
hsa-miR-26a	MIMAT0000082	NM_003383	VLDLR	very low density lipoprotein receptor	0	0	1	0	0	0	1	1	0	1	0
hsa-miR-26a	MIMAT0000082	NM_003286	TOP1	topoisomerase (DNA) I	0	0	0	0	0	0	1	1	0	1	1
hsa-miR-26a	MIMAT0000082	NM_003242	TGFBR2	transforming growth factor, beta receptor II (70/80kDa)	0	1	0	0	0	0	0	1	1	1	0
hsa-miR-26a	MIMAT0000082	NM_002677	PMP2	peripheral myelin protein 2	0	0	1	1	0	0	0	1	0	1	0
hsa-miR-26a	MIMAT0000082	NM_001402	EEF1A1	eukaryotic translation elongation factor 1 alpha 1	0	0	1	1	0	0	0	1	0	1	0
hsa-miR-26a	MIMAT0000082	NM_001018068	SERBP1	SERPINE1 mRNA binding protein 1	0	0	1	1	0	0	0	1	0	1	0
hsa-miR-26a	MIMAT0000082	NM_001008224	UACA	uveal autoantigen with coiled-coil domains and ankyrin repeats	0	0	1	1	0	0	0	1	0	1	0
hsa-miR-26a	MIMAT0000082	NM_001007094	ZNF37A	zinc finger protein 37A	0	0	1	1	0	0	0	1	0	1	0
hsa-miR-26a	MIMAT0000082	NM_001006932	RPS6KA2	ribosomal protein S6 kinase, 90kDa, polypeptide 2	0	0	1	0	0	0	0	1	0	1	1
hsa-miR-26a	MIMAT0000082	NM_001006635	MTX2	metaxin 2	0	0	0	1	0	0	0	1	0	1	1
hsa-miR-26a	MIMAT0000082	NM_001006623	WDR33	WD repeat domain 33	0	0	1	1	0	0	0	1	0	1	0
hsa-miR-26a	MIMAT0000082	NM_001005861	RYK	RYK receptor-like tyrosine kinase	0	0	1	0	0	0	0	1	0	1	1
hsa-miR-26a	MIMAT0000082	NM_001005845	ADAM9	ADAM metallopeptidase domain 9 (meltrin gamma)	0	0	1	1	0	0	0	1	0	1	0
hsa-miR-26a	MIMAT0000082	NM_001005502	CPM	carboxypeptidase M	0	0	1	1	0	0	0	1	0	1	0
hsa-miR-26a	MIMAT0000082	NM_001008225	CNOT4	CCR4-NOT transcription complex, subunit 4	0	0	1	1	0	0	0	1	0	1	0
hsa-miR-26a	MIMAT0000082	NM_001008495	TMEM64	transmembrane protein 64	0	0	1	0	0	0	0	1	0	1	1
hsa-miR-26a	MIMAT0000082	NM_001017395	TMCC1	transmembrane and coiled-coil domain family 1	0	0	1	1	0	0	0	1	0	1	0
hsa-miR-26a	MIMAT0000082	NM_001011670	CHCHD7	coiled-coil-helix-coiled-coil-helix domain containing 7	0	0	1	1	0	0	0	1	0	1	0
hsa-miR-26a	MIMAT0000082	NM_001011668	CHCHD7	coiled-coil-helix-coiled-coil-helix domain containing 7	0	0	1	1	0	0	0	1	0	1	0
hsa-miR-26a	MIMAT0000082	NM_001011667	CHCHD7	coiled-coil-helix-coiled-coil-helix domain containing 7	0	0	1	1	0	0	0	1	0	1	0
hsa-miR-26a	MIMAT0000082	NM_001011658	TRAPPC2	trafficking protein particle complex 2	0	0	1	1	0	0	0	1	0	1	0
hsa-miR-26a	MIMAT0000082	NM_001008738	FNIP1	folliculin interacting protein 1	0	0	1	0	0	0	0	1	0	1	1
hsa-miR-26a	MIMAT0000082	NM_001008541	MXI1	MAX interactor 1	0	0	1	0	0	0	0	1	0	1	1
hsa-miR-26a	MIMAT0000082	NM_001008537	KIAA2022	KIAA2022	0	0	1	0	0	0	0	1	0	1	1
hsa-miR-26a	MIMAT0000082	NM_001005473	PLCXD3	phosphatidylinositol-specific phospholipase C, X domain containing 3	0	0	1	1	0	0	0	1	0	1	0
hsa-miR-26a	MIMAT0000082	NM_001005409	SF3A1	splicing factor 3a, subunit 1, 120kDa	0	0	1	1	0	0	0	1	0	1	0
hsa-miR-26a	MIMAT0000082	NM_001004317	LIN28B	lin-28 homolog B (C. elegans)	0	0	1	1	0	0	0	1	0	1	0
hsa-miR-26a	MIMAT0000082	NM_000523	HOXD13	homeobox D13	0	0	0	0	0	0	1	1	0	1	1
hsa-miR-26a	MIMAT0000082	NM_000387	SLC25A20	solute carrier family 25 (carnitine/acylcarnitine translocase), member 20	0	0	0	0	0	0	1	1	0	1	1
hsa-miR-26a	MIMAT0000082	NM_000337	SGCD	sarcoglycan, delta (35kDa dystrophin-associated glycoprotein)	0	0	0	0	0	0	1	1	0	1	1
hsa-miR-26a	MIMAT0000082	NM_000335	SCN5A	sodium channel, voltage-gated, type V, alpha subunit	0	0	1	1	0	0	0	1	0	1	0
hsa-miR-26a	MIMAT0000082	NM_000321	RB1	retinoblastoma 1 (including osteosarcoma)	0	0	1	1	0	0	0	1	0	1	0
hsa-miR-26a	MIMAT0000082	NM_000248	MITF	microphthalmia-associated transcription factor	0	0	1	0	0	0	0	1	0	1	1
hsa-miR-26a	MIMAT0000082	NM_000210	ITGA6	integrin, alpha 6	0	0	0	0	0	0	1	1	0	1	1
hsa-miR-26a	MIMAT0000082	NM_000135	FANCA	Fanconi anemia, complementation group A	0	0	0	0	0	0	1	1	0	1	1
hsa-miR-26a	MIMAT0000082	NM_000600	IL6	interleukin 6 (interferon, beta 2)	0	0	0	0	0	0	1	1	0	1	1
hsa-miR-26a	MIMAT0000082	NM_000618	IGF1	insulin-like growth factor 1 (somatomedin C)	0	0	1	0	0	0	0	1	0	1	1
hsa-miR-26a	MIMAT0000082	NM_001003800	BICD2	bicaudal D homolog 2 (Drosophila)	0	0	1	0	0	0	1	1	0	1	0
hsa-miR-26a	MIMAT0000082	NM_001002860	BTBD7	BTB (POZ) domain containing 7	0	0	0	0	0	0	1	1	0	1	1
hsa-miR-26a	MIMAT0000082	NM_001001550	GRB10	growth factor receptor-bound protein 10	0	0	1	1	0	0	0	1	0	1	0
hsa-miR-26a	MIMAT0000082	NM_001001481	UBE2W	ubiquitin-conjugating enzyme E2W (putative)	0	0	0	0	0	0	1	1	0	1	1
hsa-miR-26a	MIMAT0000082	NM_000917	P4HA1	procollagen-proline, 2-oxoglutarate 4-dioxygenase (proline 4-hydroxylase), alpha polypeptide I	0	0	1	1	0	0	0	1	0	1	0
hsa-miR-26a	MIMAT0000082	NM_000902	MME	membrane metallo-endopeptidase	0	0	1	1	0	0	0	1	0	1	0
hsa-miR-26a	MIMAT0000082	NM_000814	GABRB3	gamma-aminobutyric acid (GABA) A receptor, beta 3	0	0	1	0	0	0	0	1	0	1	1
hsa-miR-26a	MIMAT0000082	NM_000637	GSR	glutathione reductase	0	0	1	1	0	0	0	1	0	1	0
hsa-miR-26a	MIMAT0000082	NM_000046	ARSB	arylsulfatase B	0	0	1	1	0	0	0	1	0	1	0
hsa-miR-26a	MIMAT0000082	NM_001401	LPAR1	lysophosphatidic acid receptor 1	0	0	0	0	0	0	1	1	0	1	1
hsa-miR-26a	MIMAT0000082	NM_001079802	FKTN	fukutin	0	0	1	1	0	0	0	1	0	1	0
hsa-miR-26a	MIMAT0000082	NM_001077243	GRIA4	glutamate receptor, ionotrophic, AMPA 4	0	0	1	0	0	0	0	1	0	1	1
hsa-miR-26a	MIMAT0000082	NM_001042599	ERBB4	v-erb-a erythroblastic leukemia viral oncogene homolog 4 (avian)	0	0	1	0	0	0	0	1	0	1	1
hsa-miR-26a	MIMAT0000082	NM_001042559	EIF4G2	eukaryotic translation initiation factor 4 gamma, 2	0	0	0	1	0	0	0	1	0	1	1
hsa-miR-26a	MIMAT0000082	NM_001042473	ACBD5	acyl-Coenzyme A binding domain containing 5	0	0	0	1	0	0	0	1	0	1	1
hsa-miR-26a	MIMAT0000082	NM_001042453	RP6-213H19.1	serine/threonine protein kinase MST4	0	0	1	1	0	0	0	1	0	1	0
hsa-miR-26a	MIMAT0000082	NM_001042452	RP6-213H19.1	serine/threonine protein kinase MST4	0	0	1	1	0	0	0	1	0	1	0
hsa-miR-26a	MIMAT0000082	NM_001040712	PTPRD	protein tyrosine phosphatase, receptor type, D	0	0	1	0	0	0	0	1	0	1	1
hsa-miR-26a	MIMAT0000082	NM_001080470	ZNF697	zinc finger protein 697	0	0	1	0	0	0	0	1	0	1	1
hsa-miR-26a	MIMAT0000082	NM_001100	ACTA1	actin, alpha 1, skeletal muscle	0	0	0	0	0	0	1	1	0	1	1
hsa-miR-26a	MIMAT0000082	NM_001338	CXADR	coxsackie virus and adenovirus receptor	0	0	1	1	0	0	0	1	0	1	0
hsa-miR-26a	MIMAT0000082	NM_001332	CTNND2	catenin (cadherin-associated protein), delta 2 (neural plakophilin-related arm-repeat protein)	0	0	0	1	0	0	0	1	0	1	1
hsa-miR-26a	MIMAT0000082	NM_001310	CREBL2	cAMP responsive element binding protein-like 2	0	0	1	1	0	0	0	1	0	1	0
hsa-miR-26a	MIMAT0000082	NM_001238	CCNE1	cyclin E1	0	0	0	0	0	0	1	1	0	1	1
hsa-miR-26a	MIMAT0000082	NM_001188	BAK1	BCL2-antagonist/killer 1	0	0	1	0	0	0	0	1	0	1	1
hsa-miR-26a	MIMAT0000082	NM_001177	ARL1	ADP-ribosylation factor-like 1	0	0	1	1	0	0	0	1	0	1	0
hsa-miR-26a	MIMAT0000082	NM_001148	ANK2	ankyrin 2, neuronal	0	0	0	0	0	0	1	1	0	1	1
hsa-miR-26a	MIMAT0000082	NM_001103	ACTN2	actinin, alpha 2	0	0	1	1	0	0	0	1	0	1	0
hsa-miR-26a	MIMAT0000082	NM_001040200	CLDND1	claudin domain containing 1	0	0	1	1	0	0	0	1	0	1	0
hsa-miR-26a	MIMAT0000082	NM_001040199	CLDND1	claudin domain containing 1	0	0	1	1	0	0	0	1	0	1	0
hsa-miR-26a	MIMAT0000082	NM_001040183	CLDND1	claudin domain containing 1	0	0	1	1	0	0	0	1	0	1	0
hsa-miR-26a	MIMAT0000082	NM_001031716	OBFC2A	oligonucleotide/oligosaccharide-binding fold containing 2A	0	0	1	0	0	0	0	1	0	1	1
hsa-miR-26a	MIMAT0000082	NM_001031700	C4orf18	chromosome 4 open reading frame 18	0	0	1	1	0	0	0	1	0	1	0
hsa-miR-26a	MIMAT0000082	NM_001031681	CTNS	cystinosis, nephropathic	0	0	1	1	0	0	0	1	0	1	0
hsa-miR-26a	MIMAT0000082	NM_001025077	CUGBP2	CUG triplet repeat, RNA binding protein 2	0	0	1	0	0	0	0	1	0	1	1
hsa-miR-26a	MIMAT0000082	NM_001025069	ARPP-21	cyclic AMP-regulated phosphoprotein, 21 kD	0	0	1	1	0	0	0	1	0	1	0
hsa-miR-26a	MIMAT0000082	NM_001025068	ARPP-21	cyclic AMP-regulated phosphoprotein, 21 kD	0	0	0	1	0	0	0	1	0	1	1
hsa-miR-26a	MIMAT0000082	NM_001024226	ARF1	ADP-ribosylation factor 1	0	0	1	0	0	0	0	1	0	1	1
hsa-miR-26a	MIMAT0000082	NM_001018103	GRINL1A	glutamate receptor, ionotropic, N-methyl D-aspartate-like 1A	0	0	1	1	0	0	0	1	0	1	0
hsa-miR-26a	MIMAT0000082	NM_001032396	PJA1	praja 1	0	0	1	1	0	0	0	1	0	1	0
hsa-miR-26a	MIMAT0000082	NM_001035521	GTF3C2	general transcription factor IIIC, polypeptide 2, beta 110kDa	0	0	1	0	0	0	0	1	0	1	1
hsa-miR-26a	MIMAT0000082	NM_001040182	CLDND1	claudin domain containing 1	0	0	1	1	0	0	0	1	0	1	0
hsa-miR-26a	MIMAT0000082	NM_001039845	MDH1B	malate dehydrogenase 1B, NAD (soluble)	0	0	1	1	0	0	0	1	0	1	0
hsa-miR-26a	MIMAT0000082	NM_001039591	USP9X	ubiquitin specific peptidase 9, X-linked	0	0	1	1	0	0	0	1	0	1	0
hsa-miR-26a	MIMAT0000082	NM_001039580	MAP9	microtubule-associated protein 9	0	0	1	0	0	0	0	1	0	1	1
hsa-miR-26a	MIMAT0000082	NM_001039577	CCNL2	cyclin L2	0	0	1	1	0	0	0	1	0	1	0
hsa-miR-26a	MIMAT0000082	NM_001039477	C1orf38	chromosome 1 open reading frame 38	0	0	1	1	0	0	0	1	0	1	0
hsa-miR-26a	MIMAT0000082	NM_001039199	C20orf121	chromosome 20 open reading frame 121	0	0	1	1	0	0	0	1	0	1	0
hsa-miR-26a	MIMAT0000082	NM_001037290	BCO2	beta-carotene oxygenase 2	0	0	1	1	0	0	0	1	0	1	0
hsa-miR-26a	MIMAT0000082	NM_001018069	SERBP1	SERPINE1 mRNA binding protein 1	0	0	1	1	0	0	0	1	0	1	0
hsa-miR-26a	MIMAT0000082	NM_004397	DDX6	DEAD (Asp-Glu-Ala-Asp) box polypeptide 6	0	0	1	1	0	0	0	1	0	1	0
hsa-miR-26a	MIMAT0000082	NM_016124	RHD	Rh blood group, D antigen	0	0	1	1	0	0	0	1	0	1	0
hsa-miR-26a	MIMAT0000082	NM_015270	ADCY6	adenylate cyclase 6	0	0	0	0	0	0	1	1	0	1	1
hsa-miR-26a	MIMAT0000082	NM_015250	BICD2	bicaudal D homolog 2 (Drosophila)	0	0	0	0	0	0	1	1	0	1	1
hsa-miR-26a	MIMAT0000082	NM_015224	C3orf63	chromosome 3 open reading frame 63	0	0	1	1	0	0	0	1	0	1	0
hsa-miR-26a	MIMAT0000082	NM_015206	KIAA1024	KIAA1024	0	0	1	1	0	0	0	1	0	1	0
hsa-miR-26a	MIMAT0000082	NM_015199	ANKRD28	ankyrin repeat domain 28	0	0	1	1	0	0	0	1	0	1	0
hsa-miR-26a	MIMAT0000082	NM_015192	PLCB1	phospholipase C, beta 1 (phosphoinositide-specific)	0	0	1	0	0	0	1	1	0	1	0
hsa-miR-26a	MIMAT0000082	NM_015176	FBXO28	F-box protein 28	0	0	0	0	0	0	1	1	0	1	1
hsa-miR-26a	MIMAT0000082	NM_015170	SULF1	sulfatase 1	0	0	0	1	0	0	0	1	0	1	1
hsa-miR-26a	MIMAT0000082	NM_015338	ASXL1	additional sex combs like 1 (Drosophila)	0	0	0	0	0	0	1	1	0	1	1
hsa-miR-26a	MIMAT0000082	NM_015344	LEPROTL1	leptin receptor overlapping transcript-like 1	0	0	1	1	0	0	0	1	0	1	0
hsa-miR-26a	MIMAT0000082	NM_016081	PALLD	palladin, cytoskeletal associated protein	0	0	1	1	0	0	0	1	0	1	0
hsa-miR-26a	MIMAT0000082	NM_016018	PHF20L1	PHD finger protein 20-like 1	0	0	0	0	0	0	1	1	0	1	1
hsa-miR-26a	MIMAT0000082	NM_015981	CAMK2A	calcium/calmodulin-dependent protein kinase (CaM kinase) II alpha	0	0	0	0	0	0	1	1	0	1	1
hsa-miR-26a	MIMAT0000082	NM_015608	C10orf137	chromosome 10 open reading frame 137	0	0	0	0	0	0	1	1	0	1	1
hsa-miR-26a	MIMAT0000082	NM_015595	SGEF	Src homology 3 domain-containing guanine nucleotide exchange factor	0	0	0	0	0	0	1	1	0	1	1
hsa-miR-26a	MIMAT0000082	NM_015464	SOSTDC1	sclerostin domain containing 1	0	0	0	0	0	0	1	1	0	1	1
hsa-miR-26a	MIMAT0000082	NM_015409	EP400	E1A binding protein p400	0	0	1	0	0	0	0	1	0	1	1
hsa-miR-26a	MIMAT0000082	NM_015349	KIAA0240	KIAA0240	0	0	1	0	0	0	0	1	0	1	1
hsa-miR-26a	MIMAT0000082	NM_015153	PHF3	PHD finger protein 3	0	0	0	0	0	0	1	1	0	1	1
hsa-miR-26a	MIMAT0000082	NM_015093	MAP3K7IP2	mitogen-activated protein kinase kinase kinase 7 interacting protein 2	0	0	0	0	0	0	1	1	0	1	1
hsa-miR-26a	MIMAT0000082	NM_015045	WAPAL	wings apart-like homolog (Drosophila)	0	0	0	0	0	0	1	1	0	1	1
hsa-miR-26a	MIMAT0000082	NM_014819	PJA2	praja 2, RING-H2 motif containing	0	0	1	1	0	0	0	1	0	1	0
hsa-miR-26a	MIMAT0000082	NM_014802	KIAA0528	KIAA0528	0	0	0	0	0	0	1	1	0	1	1
hsa-miR-26a	MIMAT0000082	NM_014795	ZEB2	zinc finger E-box binding homeobox 2	0	0	0	0	0	0	1	1	0	1	1
hsa-miR-26a	MIMAT0000082	NM_014790	JAKMIP2	janus kinase and microtubule interacting protein 2	0	0	0	0	0	0	1	1	0	1	1
hsa-miR-26a	MIMAT0000082	NM_014782	ARMCX2	armadillo repeat containing, X-linked 2	0	0	0	0	0	0	1	1	0	1	1
hsa-miR-26a	MIMAT0000082	NM_014730	KIAA0152	KIAA0152	0	0	0	0	0	0	1	1	0	1	1
hsa-miR-26a	MIMAT0000082	NM_014631	SH3PXD2A	SH3 and PX domains 2A	0	0	1	0	0	0	0	1	0	1	1
hsa-miR-26a	MIMAT0000082	NM_014603	CDR2L	cerebellar degeneration-related protein 2-like	0	0	0	0	0	0	1	1	0	1	1
hsa-miR-26a	MIMAT0000082	NM_014824	FCHSD2	FCH and double SH3 domains 2	0	0	0	0	0	0	1	1	0	1	1
hsa-miR-26a	MIMAT0000082	NM_014835	OSBPL2	oxysterol binding protein-like 2	0	0	0	0	0	0	1	1	0	1	1
hsa-miR-26a	MIMAT0000082	NM_015040	PIP5K3	phosphatidylinositol-3-phosphate/phosphatidylinositol 5-kinase, type III	0	0	1	1	0	0	0	1	0	1	0
hsa-miR-26a	MIMAT0000082	NM_014999	RAB21	RAB21, member RAS oncogene family	0	0	1	1	0	0	0	1	0	1	0
hsa-miR-26a	MIMAT0000082	NM_014997	KIAA0265	KIAA0265 protein	0	0	1	1	0	0	0	1	0	1	0
hsa-miR-26a	MIMAT0000082	NM_014991	WDFY3	WD repeat and FYVE domain containing 3	0	0	0	0	0	0	1	1	0	1	1
hsa-miR-26a	MIMAT0000082	NM_014937	INPP5F	inositol polyphosphate-5-phosphatase F	0	0	1	1	0	0	0	1	0	1	0
hsa-miR-26a	MIMAT0000082	NM_014920	ICK	intestinal cell (MAK-like) kinase	0	0	0	0	0	0	1	1	0	1	1
hsa-miR-26a	MIMAT0000082	NM_014918	CHSY1	chondroitin sulfate synthase 1	0	0	0	0	0	0	1	1	0	1	1
hsa-miR-26a	MIMAT0000082	NM_014877	HELZ	helicase with zinc finger	0	0	1	0	0	0	0	1	0	1	1
hsa-miR-26a	MIMAT0000082	NM_014563	TRAPPC2	trafficking protein particle complex 2	0	0	1	1	0	0	0	1	0	1	0
hsa-miR-26a	MIMAT0000082	NM_018356	C5orf22	chromosome 5 open reading frame 22	0	0	1	1	0	0	0	1	0	1	0
hsa-miR-26a	MIMAT0000082	NM_018000	MREG	melanoregulin	0	0	0	0	0	0	1	1	0	1	1
hsa-miR-26a	MIMAT0000082	NM_017994	C7orf42	chromosome 7 open reading frame 42	0	0	1	0	0	0	0	1	0	1	1
hsa-miR-26a	MIMAT0000082	NM_017917	PPP2R3C	protein phosphatase 2 (formerly 2A), regulatory subunit B"", gamma	0	0	1	1	0	0	0	1	0	1	0
hsa-miR-26a	MIMAT0000082	NM_017813	IMPAD1	inositol monophosphatase domain containing 1	0	0	1	1	0	0	0	1	0	1	0
hsa-miR-26a	MIMAT0000082	NM_017811	UBE2R2	ubiquitin-conjugating enzyme E2R 2	0	0	1	1	0	0	0	1	0	1	0
hsa-miR-26a	MIMAT0000082	NM_017779	DEPDC1	DEP domain containing 1	0	0	1	1	0	0	0	1	0	1	0
hsa-miR-26a	MIMAT0000082	NM_017769	KIAA1333	KIAA1333	0	0	1	1	0	0	0	1	0	1	0
hsa-miR-26a	MIMAT0000082	NM_017740	ZDHHC7	zinc finger, DHHC-type containing 7	0	0	1	1	0	0	0	1	0	1	0
hsa-miR-26a	MIMAT0000082	NM_018112	TMEM38B	transmembrane protein 38B	0	0	1	1	0	0	0	1	0	1	0
hsa-miR-26a	MIMAT0000082	NM_018159	NUDT11	nudix (nucleoside diphosphate linked moiety X)-type motif 11	0	0	1	1	0	0	0	1	0	1	0
hsa-miR-26a	MIMAT0000082	NM_018339	RFK	riboflavin kinase	0	0	1	1	0	0	0	1	0	1	0
hsa-miR-26a	MIMAT0000082	NM_018334	LRRN3	leucine rich repeat neuronal 3	0	0	0	0	0	0	1	1	0	1	1
hsa-miR-26a	MIMAT0000082	NM_018323	PI4K2B	phosphatidylinositol 4-kinase type 2 beta	0	0	1	1	0	0	0	1	0	1	0
hsa-miR-26a	MIMAT0000082	NM_018290	PGM2	phosphoglucomutase 2	0	0	1	1	0	0	0	1	0	1	0
hsa-miR-26a	MIMAT0000082	NM_018284	GBP3	guanylate binding protein 3	0	0	1	1	0	0	0	1	0	1	0
hsa-miR-26a	MIMAT0000082	NM_018221	MOBKL1B	MOB1, Mps One Binder kinase activator-like 1B (yeast)	0	0	0	0	0	0	1	1	0	1	1
hsa-miR-26a	MIMAT0000082	NM_018190	BBS7	Bardet-Biedl syndrome 7	0	0	1	1	0	0	0	1	0	1	0
hsa-miR-26a	MIMAT0000082	NM_018171	APPL2	adaptor protein, phosphotyrosine interaction, PH domain and leucine zipper containing 2	0	0	0	0	0	0	1	1	0	1	1
hsa-miR-26a	MIMAT0000082	NM_017734	PALMD	palmdelphin	0	0	0	0	0	0	1	1	0	1	1
hsa-miR-26a	MIMAT0000082	NM_017694	FLJ20160	FLJ20160 protein	0	0	0	0	0	0	1	1	0	1	1
hsa-miR-26a	MIMAT0000082	NM_017658	KLHL28	kelch-like 28 (Drosophila)	0	0	1	0	0	0	0	1	0	1	1
hsa-miR-26a	MIMAT0000082	NM_016513	ICK	intestinal cell (MAK-like) kinase	0	0	1	0	0	0	1	1	0	1	0
hsa-miR-26a	MIMAT0000082	NM_016422	RNF141	ring finger protein 141	0	0	1	1	0	0	0	1	0	1	0
hsa-miR-26a	MIMAT0000082	NM_016403	CWC15	CWC15 homolog (S. cerevisiae)	0	0	1	1	0	0	0	1	0	1	0
hsa-miR-26a	MIMAT0000082	NM_016356	DCDC2	doublecortin domain containing 2	0	0	0	0	0	0	1	1	0	1	1
hsa-miR-26a	MIMAT0000082	NM_016269	LEF1	lymphoid enhancer-binding factor 1	0	0	0	0	0	0	1	1	0	1	1
hsa-miR-26a	MIMAT0000082	NM_016256	NAGPA	N-acetylglucosamine-1-phosphodiester alpha-N-acetylglucosaminidase	0	0	0	0	0	0	1	1	0	1	1
hsa-miR-26a	MIMAT0000082	NM_016255	FAM8A1	family with sequence similarity 8, member A1	0	0	1	1	0	0	0	1	0	1	0
hsa-miR-26a	MIMAT0000082	NM_016231	NLK	nemo-like kinase	0	0	0	0	0	0	1	1	0	1	1
hsa-miR-26a	MIMAT0000082	NM_016542	RP6-213H19.1	serine/threonine protein kinase MST4	0	0	1	1	0	0	0	1	0	1	0
hsa-miR-26a	MIMAT0000082	NM_016551	TM7SF3	transmembrane 7 superfamily member 3	0	0	1	1	0	0	0	1	0	1	0
hsa-miR-26a	MIMAT0000082	NM_017640	LRRC16A	leucine rich repeat containing 16A	0	0	0	0	0	0	1	1	0	1	1
hsa-miR-26a	MIMAT0000082	NM_017610	RNF111	ring finger protein 111	0	0	0	0	0	0	1	1	0	1	1
hsa-miR-26a	MIMAT0000082	NM_017590	ZC3H7B	zinc finger CCCH-type containing 7B	0	0	0	0	0	0	1	1	0	1	1
hsa-miR-26a	MIMAT0000082	NM_017576	KIF27	kinesin family member 27	0	0	1	1	0	0	0	1	0	1	0
hsa-miR-26a	MIMAT0000082	NM_016623	FAM49B	family with sequence similarity 49, member B	0	0	0	0	0	0	1	1	0	1	1
hsa-miR-26a	MIMAT0000082	NM_016621	PHF21A	PHD finger protein 21A	0	0	0	0	0	0	1	1	0	1	1
hsa-miR-26a	MIMAT0000082	NM_016613	C4orf18	chromosome 4 open reading frame 18	0	0	1	1	0	0	0	1	0	1	0
hsa-miR-26a	MIMAT0000082	NM_016557	CCRL1	chemokine (C-C motif) receptor-like 1	0	0	1	1	0	0	0	1	0	1	0
hsa-miR-26a	MIMAT0000082	NM_016186	SERPINA10	serpin peptidase inhibitor, clade A (alpha-1 antiproteinase, antitrypsin), member 10	0	0	1	1	0	0	0	1	0	1	0
hsa-miR-26a	MIMAT0000082	NM_014382	ATP2C1	ATPase, Ca++ transporting, type 2C, member 1	0	0	0	0	0	0	1	1	0	1	1
hsa-miR-26a	MIMAT0000082	NM_006226	PLCL1	phospholipase C-like 1	0	0	1	1	0	0	0	1	0	1	0
hsa-miR-26a	MIMAT0000082	NM_005738	ARL4A	ADP-ribosylation factor-like 4A	0	0	1	1	0	0	0	1	0	1	0
hsa-miR-26a	MIMAT0000082	NM_005730	CTDSP2	CTD (carboxy-terminal domain, RNA polymerase II, polypeptide A) small phosphatase 2	0	0	0	0	0	0	1	1	0	1	1
hsa-miR-26a	MIMAT0000082	NM_005684	GPR52	G protein-coupled receptor 52	0	0	1	1	0	0	0	1	0	1	0
hsa-miR-26a	MIMAT0000082	NM_005668	ST8SIA4	ST8 alpha-N-acetyl-neuraminide alpha-2,8-sialyltransferase 4	0	0	0	0	0	0	1	1	0	1	1
hsa-miR-26a	MIMAT0000082	NM_005655	KLF10	Kruppel-like factor 10	0	0	0	1	0	0	1	1	0	1	0
hsa-miR-26a	MIMAT0000082	NM_005511	MLANA	melan-A	0	0	1	1	0	0	0	1	0	1	0
hsa-miR-26a	MIMAT0000082	NM_005502	ABCA1	ATP-binding cassette, sub-family A (ABC1), member 1	0	0	0	0	0	0	1	1	0	1	1
hsa-miR-26a	MIMAT0000082	NM_005493	RANBP9	RAN binding protein 9	0	0	0	0	0	0	1	1	0	1	1
hsa-miR-26a	MIMAT0000082	NM_005828	WDR68	WD repeat domain 68	0	0	0	0	0	0	1	1	0	1	1
hsa-miR-26a	MIMAT0000082	NM_005859	PURA	purine-rich element binding protein A	0	0	1	0	0	0	0	1	0	1	1
hsa-miR-26a	MIMAT0000082	NM_006178	NSF	N-ethylmaleimide-sensitive factor	0	0	1	1	0	0	0	1	0	1	0
hsa-miR-26a	MIMAT0000082	NM_006135	CAPZA1	capping protein (actin filament) muscle Z-line, alpha 1	0	0	0	0	0	0	1	1	0	1	1
hsa-miR-26a	MIMAT0000082	NM_005964	MYH10	myosin, heavy chain 10, non-muscle	0	0	1	0	0	0	1	1	0	1	0
hsa-miR-26a	MIMAT0000082	NM_005962	MXI1	MAX interactor 1	0	0	1	0	0	0	1	1	0	1	0
hsa-miR-26a	MIMAT0000082	NM_005941	MMP16	matrix metallopeptidase 16 (membrane-inserted)	0	0	1	0	0	0	0	1	0	1	1
hsa-miR-26a	MIMAT0000082	NM_005911	MAT2A	methionine adenosyltransferase II, alpha	0	0	1	1	0	0	0	1	0	1	0
hsa-miR-26a	MIMAT0000082	NM_005895	GOLGA3	golgi autoantigen, golgin subfamily a, 3	0	0	1	1	0	0	0	1	0	1	0
hsa-miR-26a	MIMAT0000082	NM_005882	MAEA	macrophage erythroblast attacher	0	0	1	1	0	0	0	1	0	1	0
hsa-miR-26a	MIMAT0000082	NM_005483	CHAF1A	chromatin assembly factor 1, subunit A (p150)	0	0	1	0	0	0	1	1	0	1	0
hsa-miR-26a	MIMAT0000082	NM_005433	YES1	v-yes-1 Yamaguchi sarcoma viral oncogene homolog 1	0	0	0	0	0	0	1	1	0	1	1
hsa-miR-26a	MIMAT0000082	NM_005339	UBE2K	ubiquitin-conjugating enzyme E2K (UBC1 homolog, yeast)	0	0	1	1	0	0	0	1	0	1	0
hsa-miR-26a	MIMAT0000082	NM_004992	MECP2	methyl CpG binding protein 2 (Rett syndrome)	0	0	0	0	0	0	1	1	0	1	1
hsa-miR-26a	MIMAT0000082	NM_004930	CAPZB	capping protein (actin filament) muscle Z-line, beta	0	0	0	1	0	0	0	1	0	1	1
hsa-miR-26a	MIMAT0000082	NM_004921	CLCA3	chloride channel, calcium activated, family member 3	0	0	1	1	0	0	0	1	0	1	0
hsa-miR-26a	MIMAT0000082	NM_004848	C1orf38	chromosome 1 open reading frame 38	0	0	1	1	0	0	0	1	0	1	0
hsa-miR-26a	MIMAT0000082	NM_004694	SLC16A6	solute carrier family 16, member 6 (monocarboxylic acid transporter 7)	0	0	0	0	0	0	1	1	0	1	1
hsa-miR-26a	MIMAT0000082	NM_004663	RAB11A	RAB11A, member RAS oncogene family	0	0	0	0	0	0	1	1	0	1	1
hsa-miR-26a	MIMAT0000082	NM_004440	EPHA7	EPH receptor A7	0	0	0	0	0	0	1	1	0	1	1
hsa-miR-26a	MIMAT0000082	NM_004432	ELAVL2	ELAV (embryonic lethal, abnormal vision, Drosophila)-like 2 (Hu antigen B)	0	0	1	0	0	0	0	1	0	1	1
hsa-miR-26a	MIMAT0000082	NM_004995	MMP14	matrix metallopeptidase 14 (membrane-inserted)	0	0	0	0	0	0	1	1	0	1	1
hsa-miR-26a	MIMAT0000082	NM_005066	SFPQ	splicing factor proline/glutamine-rich (polypyrimidine tract binding protein associated)	0	0	1	1	0	0	0	1	0	1	0
hsa-miR-26a	MIMAT0000082	NM_005328	HAS2	hyaluronan synthase 2	0	0	0	0	0	0	1	1	0	1	1
hsa-miR-26a	MIMAT0000082	NM_005311	GRB10	growth factor receptor-bound protein 10	0	0	1	1	0	0	0	1	0	1	0
hsa-miR-26a	MIMAT0000082	NM_005235	ERBB4	v-erb-a erythroblastic leukemia viral oncogene homolog 4 (avian)	0	0	1	0	0	0	1	1	0	1	0
hsa-miR-26a	MIMAT0000082	NM_005224	ARID3A	AT rich interactive domain 3A (BRIGHT-like)	0	0	0	0	0	0	1	1	0	1	1
hsa-miR-26a	MIMAT0000082	NM_005168	RND3	Rho family GTPase 3	0	0	0	0	0	0	1	1	0	1	1
hsa-miR-26a	MIMAT0000082	NM_005156	ROD1	ROD1 regulator of differentiation 1 (S. pombe)	0	0	1	1	0	0	0	1	0	1	0
hsa-miR-26a	MIMAT0000082	NM_005124	NUP153	nucleoporin 153kDa	0	0	0	0	0	0	1	1	0	1	1
hsa-miR-26a	MIMAT0000082	NM_005121	MED13	mediator complex subunit 13	0	0	1	0	0	0	0	1	0	1	1
hsa-miR-26a	MIMAT0000082	NM_004431	EPHA2	EPH receptor A2	0	0	0	0	0	0	1	1	0	1	1
hsa-miR-26a	MIMAT0000082	NM_014246	CELSR1	cadherin, EGF LAG seven-pass G-type receptor 1 (flamingo homolog, Drosophila)	0	0	0	0	0	0	1	1	0	1	1
hsa-miR-26a	MIMAT0000082	NM_012309	SHANK2	SH3 and multiple ankyrin repeat domains 2	0	0	1	1	0	0	0	1	0	1	0
hsa-miR-26a	MIMAT0000082	NM_012298	CAND2	cullin-associated and neddylation-dissociated 2 (putative)	0	0	1	1	0	0	0	1	0	1	0
hsa-miR-26a	MIMAT0000082	NM_012224	NEK1	NIMA (never in mitosis gene a)-related kinase 1	0	0	1	1	0	0	0	1	0	1	0
hsa-miR-26a	MIMAT0000082	NM_012219	MRAS	muscle RAS oncogene homolog	0	0	0	1	0	0	1	1	0	1	0
hsa-miR-26a	MIMAT0000082	NM_012215	MGEA5	meningioma expressed antigen 5 (hyaluronidase)	0	0	0	0	0	0	1	1	0	1	1
hsa-miR-26a	MIMAT0000082	NM_012153	EHF	ets homologous factor	0	0	1	1	0	0	0	1	0	1	0
hsa-miR-26a	MIMAT0000082	NM_012083	FRAT2	frequently rearranged in advanced T-cell lymphomas 2	0	0	1	1	0	0	0	1	0	1	0
hsa-miR-26a	MIMAT0000082	NM_012072	CD93	CD93 molecule	0	0	1	1	0	0	0	1	0	1	0
hsa-miR-26a	MIMAT0000082	NM_012311	KIN	KIN, antigenic determinant of recA protein homolog (mouse)	0	0	1	1	0	0	0	1	0	1	0
hsa-miR-26a	MIMAT0000082	NM_012316	KPNA6	karyopherin alpha 6 (importin alpha 7)	0	0	1	1	0	0	0	1	0	1	0
hsa-miR-26a	MIMAT0000082	NM_014166	MED4	mediator complex subunit 4	0	0	1	1	0	0	0	1	0	1	0
hsa-miR-26a	MIMAT0000082	NM_014112	TRPS1	trichorhinophalangeal syndrome I	0	0	0	0	0	0	1	1	0	1	1
hsa-miR-26a	MIMAT0000082	NM_014053	FLVCR1	feline leukemia virus subgroup C cellular receptor 1	0	0	1	0	0	0	1	1	0	1	0
hsa-miR-26a	MIMAT0000082	NM_013417	IARS	isoleucyl-tRNA synthetase	0	0	1	1	0	0	0	1	0	1	0
hsa-miR-26a	MIMAT0000082	NM_013296	GPSM2	G-protein signaling modulator 2 (AGS3-like, C. elegans)	0	0	1	1	0	0	0	1	0	1	0
hsa-miR-26a	MIMAT0000082	NM_012424	RPS6KC1	ribosomal protein S6 kinase, 52kDa, polypeptide 1	0	0	1	1	0	0	0	1	0	1	0
hsa-miR-26a	MIMAT0000082	NM_012395	PFTK1	PFTAIRE protein kinase 1	0	0	0	0	0	0	1	1	0	1	1
hsa-miR-26a	MIMAT0000082	NM_012333	MYCBP	c-myc binding protein	0	0	0	0	0	0	1	1	0	1	1
hsa-miR-26a	MIMAT0000082	NM_007288	MME	membrane metallo-endopeptidase	0	0	1	1	0	0	0	1	0	1	0
hsa-miR-26a	MIMAT0000082	NM_007287	MME	membrane metallo-endopeptidase	0	0	1	1	0	0	0	1	0	1	0
hsa-miR-26a	MIMAT0000082	NM_007217	PDCD10	programmed cell death 10	0	0	0	0	0	0	1	1	0	1	1
hsa-miR-26a	MIMAT0000082	NM_006751	SSFA2	sperm specific antigen 2	0	0	0	0	0	0	1	1	0	1	1
hsa-miR-26a	MIMAT0000082	NM_006682	FGL2	fibrinogen-like 2	0	0	1	1	0	0	0	1	0	1	0
hsa-miR-26a	MIMAT0000082	NM_006662	SRCAP	Snf2-related CREBBP activator protein	0	0	1	0	0	0	0	1	0	1	1
hsa-miR-26a	MIMAT0000082	NM_006581	FUT9	fucosyltransferase 9 (alpha (1,3) fucosyltransferase)	0	0	1	0	0	0	0	1	0	1	1
hsa-miR-26a	MIMAT0000082	NM_006544	EXOC5	exocyst complex component 5	0	0	1	1	0	0	0	1	0	1	0
hsa-miR-26a	MIMAT0000082	NM_006421	ARFGEF1	ADP-ribosylation factor guanine nucleotide-exchange factor 1(brefeldin A-inhibited)	0	0	0	0	0	0	1	1	0	1	1
hsa-miR-26a	MIMAT0000082	NM_006413	RPP30	ribonuclease P/MRP 30kDa subunit	0	0	1	1	0	0	0	1	0	1	0
hsa-miR-26a	MIMAT0000082	NM_006320	PGRMC2	progesterone receptor membrane component 2	0	0	0	0	0	0	1	1	0	1	1
hsa-miR-26a	MIMAT0000082	NM_006761	YWHAE	tyrosine 3-monooxygenase/tryptophan 5-monooxygenase activation protein, epsilon polypeptide	0	0	0	0	0	0	1	1	0	1	1
hsa-miR-26a	MIMAT0000082	NM_006777	ZBTB33	zinc finger and BTB domain containing 33	0	0	1	1	0	0	0	1	0	1	0
hsa-miR-26a	MIMAT0000082	NM_007172	NUP50	nucleoporin 50kDa	0	0	0	1	0	0	0	1	0	1	1
hsa-miR-26a	MIMAT0000082	NM_007040	HNRNPUL1	heterogeneous nuclear ribonucleoprotein U-like 1	0	0	0	0	0	0	1	1	0	1	1
hsa-miR-26a	MIMAT0000082	NM_007010	DDX52	DEAD (Asp-Glu-Ala-Asp) box polypeptide 52	0	0	1	1	0	0	0	1	0	1	0
hsa-miR-26a	MIMAT0000082	NM_006996	SLC19A2	solute carrier family 19 (thiamine transporter), member 2	0	0	1	1	0	0	0	1	0	1	0
hsa-miR-26a	MIMAT0000082	NM_006951	TAF5	TAF5 RNA polymerase II, TATA box binding protein (TBP)-associated factor, 100kDa	0	0	0	0	0	0	1	1	0	1	1
hsa-miR-26a	MIMAT0000082	NM_006948	HSPA13	heat shock protein 70kDa family, member 13	0	0	0	1	0	0	1	1	0	1	0
hsa-miR-26a	MIMAT0000082	NM_006885	ZFHX3	zinc finger homeobox 3	0	0	1	0	0	0	0	1	0	1	1
hsa-miR-26a	MIMAT0000082	NM_006795	EHD1	EH-domain containing 1	0	0	0	0	0	0	1	1	0	1	1
hsa-miR-26a	MIMAT0000082	NM_006257	PRKCQ	protein kinase C, theta	0	0	1	1	0	0	0	1	0	1	0

## Sheet: Hoja1
		Analysis Type:	PANTHER Overrepresentation Test (release 20150430)
		Annotation Version and Release Date:	PANTHER version 10.0 Released 2015-05-15
		Analyzed List:	upload_1 (Homo sapiens)
		Reference List:	Homo sapiens (all genes in database)
		Bonferroni correction:	true
		Columna1	Columna2	Columna3	Columna4	Columna5	Columna6	Columna7
		Rutas PANTHER	REFLIST (20814)	Regulados (689)	Esperado	Cambio	Razón	Valor P
		Ruta señalización PDGF (P00047)	138	14	4.57	+	3.06	4.23E-02
		Ruta señalización Integrina (P00034)	181	18	5.99	+	3.00	7.79E-03
		Ruta señalización Wnt (P00057)	309	26	10.23	+	2.54	3.30E-03
		Sin clasificar	18255	559	604.29	-	.93	0.00E00
