# Supplementary material for: Astrocyte-Derived Small Extracellular Vesicles Regulate Dendritic Complexity through miR-26a-5p Activity
Source: Preprints.org preprint supplement (doi:10.20944/preprints202002.0250.v1), 2020-02-17
Supplement: Supplementary file 15 [file mirecords mir29a.xls]

# "1" : interaction predicted; "0" : interaction not predicted.
miRNA ID	miRNA Acc	Refseq	Symbol	Description	diana	microinspector	miranda	mirtarget2	mitarget	nbmirtar	pictar	pita	rna22	rnahybrid	targetscan
hsa-miR-29a	MIMAT0000086	NM_022552	DNMT3A	DNA (cytosine-5-)-methyltransferase 3 alpha	0	1	1	1	0	0	1	1	0	1	1
hsa-miR-29a	MIMAT0000086	NM_012421	RLF	rearranged L-myc fusion	0	0	1	1	0	0	1	1	0	1	1
hsa-miR-29a	MIMAT0000086	NM_015316	PPP1R13B	protein phosphatase 1, regulatory (inhibitor) subunit 13B	0	0	1	1	0	0	1	1	0	1	1
hsa-miR-29a	MIMAT0000086	NM_001069	TUBB2A	tubulin, beta 2A	0	0	1	1	0	0	1	1	0	1	1
hsa-miR-29a	MIMAT0000086	NM_015435	RNF19A	ring finger protein 19A	0	0	1	1	0	0	1	1	0	1	1
hsa-miR-29a	MIMAT0000086	NM_004136	IREB2	iron-responsive element binding protein 2	0	0	1	1	0	0	1	1	0	1	1
hsa-miR-29a	MIMAT0000086	NM_032701	SUV420H2	suppressor of variegation 4-20 homolog 2 (Drosophila)	0	0	1	1	0	0	1	1	0	1	1
hsa-miR-29a	MIMAT0000086	NM_018899	PCDHAC2	protocadherin alpha subfamily C, 2	0	0	1	1	0	0	1	1	0	1	1
hsa-miR-29a	MIMAT0000086	NM_001222	CAMK2G	calcium/calmodulin-dependent protein kinase (CaM kinase) II gamma	0	0	1	1	0	0	1	1	0	1	1
hsa-miR-29a	MIMAT0000086	NM_003620	PPM1D	protein phosphatase 1D magnesium-dependent, delta isoform	0	0	1	1	0	0	1	1	0	1	1
hsa-miR-29a	MIMAT0000086	NM_030816	ANKRD13C	ankyrin repeat domain 13C	0	0	1	1	0	0	1	1	0	1	1
hsa-miR-29a	MIMAT0000086	NM_017544	NKRF	NFKB repressing factor	0	0	1	1	0	0	1	1	0	1	1
hsa-miR-29a	MIMAT0000086	NM_001621	AHR	aryl hydrocarbon receptor	0	0	1	1	0	0	1	1	0	1	1
hsa-miR-29a	MIMAT0000086	NM_003222	TFAP2C	transcription factor AP-2 gamma (activating enhancer binding protein 2 gamma)	0	0	1	1	0	0	1	1	0	1	1
hsa-miR-29a	MIMAT0000086	NM_004242	HMGN3	high mobility group nucleosomal binding domain 3	0	0	1	1	0	0	1	1	0	1	1
hsa-miR-29a	MIMAT0000086	NM_004369	COL6A3	collagen, type VI, alpha 3	0	0	1	1	0	0	1	1	0	1	1
hsa-miR-29a	MIMAT0000086	NM_014918	CHSY1	chondroitin sulfate synthase 1	0	0	1	1	0	0	1	1	0	1	1
hsa-miR-29a	MIMAT0000086	NM_152678	FAM116A	family with sequence similarity 116, member A	0	0	1	1	0	0	1	1	0	1	1
hsa-miR-29a	MIMAT0000086	NM_152624	DCP2	DCP2 decapping enzyme homolog (S. cerevisiae)	0	0	1	1	0	0	1	1	0	1	1
hsa-miR-29a	MIMAT0000086	NM_152527	SLC16A14	solute carrier family 16, member 14 (monocarboxylic acid transporter 14)	0	0	1	1	0	0	1	1	0	1	1
hsa-miR-29a	MIMAT0000086	NM_152523	CCNYL1	cyclin Y-like 1	0	0	1	1	0	0	1	1	0	1	1
hsa-miR-29a	MIMAT0000086	NM_014035	SNX24	sorting nexin 24	0	0	1	1	0	0	1	1	0	1	1
hsa-miR-29a	MIMAT0000086	NM_004926	ZFP36L1	zinc finger protein 36, C3H type-like 1	0	0	1	1	0	0	1	1	0	1	1
hsa-miR-29a	MIMAT0000086	NM_138973	BACE1	beta-site APP-cleaving enzyme 1	0	1	1	0	0	0	1	1	1	1	0
hsa-miR-29a	MIMAT0000086	NM_004772	C5orf13	chromosome 5 open reading frame 13	0	0	1	1	0	0	1	1	0	1	1
hsa-miR-29a	MIMAT0000086	NM_138391	TMEM183A	transmembrane protein 183A	0	0	1	1	0	0	1	1	0	1	1
hsa-miR-29a	MIMAT0000086	NM_138390	TMEM169	transmembrane protein 169	0	0	1	1	0	0	1	1	0	1	1
hsa-miR-29a	MIMAT0000086	NM_014871	PAN2	PAN2 polyA specific ribonuclease subunit homolog (S. cerevisiae)	0	0	1	1	0	0	1	1	0	1	1
hsa-miR-29a	MIMAT0000086	NM_014903	NAV3	neuron navigator 3	0	0	1	1	0	0	1	1	0	1	1
hsa-miR-29a	MIMAT0000086	NM_003794	SNX4	sorting nexin 4	0	0	1	1	0	0	1	1	0	1	1
hsa-miR-29a	MIMAT0000086	NM_003211	TDG	thymine-DNA glycosylase	0	0	1	1	0	0	1	1	0	1	1
hsa-miR-29a	MIMAT0000086	NM_003127	SPTAN1	spectrin, alpha, non-erythrocytic 1 (alpha-fodrin)	0	0	1	1	0	0	1	1	0	1	1
hsa-miR-29a	MIMAT0000086	NM_018901	PCDHA10	protocadherin alpha 10	0	0	1	1	0	0	1	1	0	1	1
hsa-miR-29a	MIMAT0000086	NM_020801	ARRDC3	arrestin domain containing 3	0	0	1	1	0	0	1	1	0	1	1
hsa-miR-29a	MIMAT0000086	NM_002202	ISL1	ISL LIM homeobox 1	0	0	1	1	0	0	1	1	0	1	1
hsa-miR-29a	MIMAT0000086	NM_018904	PCDHA13	protocadherin alpha 13	0	0	1	1	0	0	1	1	0	1	1
hsa-miR-29a	MIMAT0000086	NM_020443	NAV1	neuron navigator 1	0	0	1	1	0	0	1	1	0	1	1
hsa-miR-29a	MIMAT0000086	NM_018905	PCDHA2	protocadherin alpha 2	0	0	1	1	0	0	1	1	0	1	1
hsa-miR-29a	MIMAT0000086	NM_018906	PCDHA3	protocadherin alpha 3	0	0	1	1	0	0	1	1	0	1	1
hsa-miR-29a	MIMAT0000086	NM_018907	PCDHA4	protocadherin alpha 4	0	0	1	1	0	0	1	1	0	1	1
hsa-miR-29a	MIMAT0000086	NM_018908	PCDHA5	protocadherin alpha 5	0	0	1	1	0	0	1	1	0	1	1
hsa-miR-29a	MIMAT0000086	NM_018909	PCDHA6	protocadherin alpha 6	0	0	1	1	0	0	1	1	0	1	1
hsa-miR-29a	MIMAT0000086	NM_019063	EML4	echinoderm microtubule associated protein like 4	0	0	1	1	0	0	1	1	0	1	1
hsa-miR-29a	MIMAT0000086	NM_018992	KCTD5	potassium channel tetramerisation domain containing 5	0	0	1	1	0	0	1	1	0	1	1
hsa-miR-29a	MIMAT0000086	NM_002482	NASP	nuclear autoantigenic sperm protein (histone-binding)	0	0	1	1	0	0	1	1	0	1	1
hsa-miR-29a	MIMAT0000086	NM_018898	PCDHAC1	protocadherin alpha subfamily C, 1	0	0	1	1	0	0	1	1	0	1	1
hsa-miR-29a	MIMAT0000086	NM_021159	RAP1GDS1	RAP1, GTP-GDP dissociation stimulator 1	0	0	1	1	0	0	1	1	0	1	1
hsa-miR-29a	MIMAT0000086	NM_003074	SMARCC1	SWI/SNF related, matrix associated, actin dependent regulator of chromatin, subfamily c, member 1	0	0	1	1	0	0	1	1	0	1	1
hsa-miR-29a	MIMAT0000086	NM_022893	BCL11A	B-cell CLL/lymphoma 11A (zinc finger protein)	0	0	1	1	0	0	1	1	0	1	1
hsa-miR-29a	MIMAT0000086	NM_022780	RMND5A	required for meiotic nuclear division 5 homolog A (S. cerevisiae)	0	0	1	1	0	0	1	1	0	1	1
hsa-miR-29a	MIMAT0000086	NM_001844	COL2A1	collagen, type II, alpha 1	0	0	1	1	0	0	1	1	0	1	1
hsa-miR-29a	MIMAT0000086	NM_001845	COL4A1	collagen, type IV, alpha 1	0	0	1	1	0	0	1	1	0	1	1
hsa-miR-29a	MIMAT0000086	NM_001846	COL4A2	collagen, type IV, alpha 2	0	0	1	1	0	0	1	1	0	1	1
hsa-miR-29a	MIMAT0000086	NM_001851	COL9A1	collagen, type IX, alpha 1	0	0	1	1	0	0	1	1	0	1	1
hsa-miR-29a	MIMAT0000086	NM_001854	COL11A1	collagen, type XI, alpha 1	0	0	1	1	0	0	1	1	0	1	1
hsa-miR-29a	MIMAT0000086	NM_001858	COL19A1	collagen, type XIX, alpha 1	0	0	1	1	0	0	1	1	0	1	1
hsa-miR-29a	MIMAT0000086	NM_022443	MLF1	myeloid leukemia factor 1	0	0	1	1	0	0	1	1	0	1	1
hsa-miR-29a	MIMAT0000086	NM_018416	FOXJ2	forkhead box J2	0	0	1	1	0	0	1	1	0	1	1
hsa-miR-29a	MIMAT0000086	NM_018667	SMPD3	sphingomyelin phosphodiesterase 3, neutral membrane (neutral sphingomyelinase II)	0	0	1	1	0	0	1	1	0	1	1
hsa-miR-29a	MIMAT0000086	NM_021643	TRIB2	tribbles homolog 2 (Drosophila)	0	0	1	1	0	0	1	1	0	1	1
hsa-miR-29a	MIMAT0000086	NM_018911	PCDHA8	protocadherin alpha 8	0	0	1	1	0	0	1	1	0	1	1
hsa-miR-29a	MIMAT0000086	NM_005841	SPRY1	sprouty homolog 1, antagonist of FGF signaling (Drosophila)	0	0	1	1	0	0	1	1	0	1	1
hsa-miR-29a	MIMAT0000086	NM_199324	OTUD4	OTU domain containing 4	0	0	1	1	0	0	1	1	0	1	1
hsa-miR-29a	MIMAT0000086	NM_173683	XKR6	XK, Kell blood group complex subunit-related family, member 6	0	0	1	1	0	0	1	1	0	1	1
hsa-miR-29a	MIMAT0000086	NM_000314	PTEN	phosphatase and tensin homolog (mutated in multiple advanced cancers 1)	0	0	1	1	0	0	1	1	0	1	1
hsa-miR-29a	MIMAT0000086	NM_001003940	BMF	Bcl2 modifying factor	0	0	1	1	0	0	1	1	0	1	1
hsa-miR-29a	MIMAT0000086	NM_000943	PPIC	peptidylprolyl isomerase C (cyclophilin C)	0	0	1	1	0	0	1	1	0	1	1
hsa-miR-29a	MIMAT0000086	NM_178123	SESTD1	SEC14 and spectrin domains 1	0	0	1	1	0	0	1	1	0	1	1
hsa-miR-29a	MIMAT0000086	NM_005329	HAS3	hyaluronan synthase 3	0	0	1	1	0	0	1	1	0	1	1
hsa-miR-29a	MIMAT0000086	NM_005302	GPR37	G protein-coupled receptor 37 (endothelin receptor type B-like)	0	0	1	1	0	0	1	1	0	1	1
hsa-miR-29a	MIMAT0000086	NM_198935	SS18L1	synovial sarcoma translocation gene on chromosome 18-like 1	0	0	1	1	0	0	1	1	0	1	1
hsa-miR-29a	MIMAT0000086	NM_005627	SGK1	serum/glucocorticoid regulated kinase 1	0	0	1	1	0	0	1	1	0	1	1
hsa-miR-29a	MIMAT0000086	NM_007162	TFEB	transcription factor EB	0	0	1	1	0	0	1	1	0	1	1
hsa-miR-29a	MIMAT0000086	NM_006791	MORF4L1	mortality factor 4 like 1	0	0	1	1	0	0	1	1	0	1	1
hsa-miR-29a	MIMAT0000086	NM_198337	INSIG1	insulin induced gene 1	0	0	1	1	0	0	1	1	0	1	1
hsa-miR-29a	MIMAT0000086	NM_000555	DCX	doublecortex; lissencephaly, X-linked (doublecortin)	0	0	1	1	0	0	1	1	0	1	1
hsa-miR-29a	MIMAT0000086	NM_005927	MFAP3	microfibrillar-associated protein 3	0	0	1	1	0	0	1	1	0	1	1
hsa-miR-29a	MIMAT0000086	NM_005399	PRKAB2	protein kinase, AMP-activated, beta 2 non-catalytic subunit	0	0	1	1	0	0	1	1	0	1	1
hsa-miR-29a	MIMAT0000086	NM_003463	PTP4A1	protein tyrosine phosphatase type IVA, member 1	0	0	1	1	0	0	1	1	0	1	1
hsa-miR-29a	MIMAT0000086	NM_000393	COL5A2	collagen, type V, alpha 2	0	0	1	1	0	0	1	1	0	1	1
hsa-miR-29a	MIMAT0000086	NM_000793	DIO2	deiodinase, iodothyronine, type II	0	0	1	1	0	0	1	1	0	1	1
hsa-miR-29a	MIMAT0000086	NM_006874	ELF2	E74-like factor 2 (ets domain transcription factor)	0	0	1	1	0	0	1	1	0	1	1
hsa-miR-29a	MIMAT0000086	NM_153252	BRWD3	bromodomain and WD repeat domain containing 3	0	0	1	1	0	0	1	1	0	1	1
hsa-miR-29a	MIMAT0000086	NM_006332	IFI30	interferon, gamma-inducible protein 30	0	0	1	1	0	0	1	1	0	1	1
hsa-miR-29a	MIMAT0000086	NM_012257	HBP1	HMG-box transcription factor 1	0	0	1	1	0	0	1	1	0	1	1
hsa-miR-29a	MIMAT0000086	NM_152910	DGKH	diacylglycerol kinase, eta	0	0	1	1	0	0	1	1	0	1	1
hsa-miR-29a	MIMAT0000086	NM_000089	COL1A2	collagen, type I, alpha 2	0	0	1	1	0	0	1	1	0	1	1
hsa-miR-29a	MIMAT0000086	NM_000090	COL3A1	collagen, type III, alpha 1 (Ehlers-Danlos syndrome type IV, autosomal dominant)	0	0	1	1	0	0	1	1	0	1	1
hsa-miR-29a	MIMAT0000086	NM_000091	COL4A3	collagen, type IV, alpha 3 (Goodpasture antigen)	0	0	1	1	0	0	1	1	0	1	1
hsa-miR-29a	MIMAT0000086	NM_000092	COL4A4	collagen, type IV, alpha 4	0	0	1	1	0	0	1	1	0	1	1
hsa-miR-29a	MIMAT0000086	NM_000859	HMGCR	3-hydroxy-3-methylglutaryl-Coenzyme A reductase	0	0	1	1	0	0	1	1	0	1	1
hsa-miR-29a	MIMAT0000086	NM_000094	COL7A1	collagen, type VII, alpha 1 (epidermolysis bullosa, dystrophic, dominant and recessive)	0	0	1	1	0	0	1	1	0	1	1
hsa-miR-29a	MIMAT0000086	NM_000138	FBN1	fibrillin 1	0	0	1	1	0	0	1	1	0	1	1
hsa-miR-29a	MIMAT0000086	NM_181354	OXR1	oxidation resistance 1	0	0	1	1	0	0	1	1	0	1	1
hsa-miR-29a	MIMAT0000086	NM_006892	DNMT3B	DNA (cytosine-5-)-methyltransferase 3 beta	0	0	1	1	0	0	1	1	0	1	1
hsa-miR-29a	MIMAT0000086	NM_000304	PMP22	peripheral myelin protein 22	0	0	1	1	0	0	1	1	0	1	1
hsa-miR-29a	MIMAT0000086	NM_152835	PDIK1L	PDLIM1 interacting kinase 1 like	0	0	1	1	0	0	1	1	0	1	1
hsa-miR-29a	MIMAT0000086	NM_017450	BAIAP2	BAI1-associated protein 2	0	0	1	0	0	0	1	1	0	1	1
hsa-miR-29a	MIMAT0000086	NM_018012	KIF26B	kinesin family member 26B	0	0	1	1	0	0	0	1	0	1	1
hsa-miR-29a	MIMAT0000086	NM_017849	TMEM127	transmembrane protein 127	0	0	1	0	0	0	1	1	0	1	1
hsa-miR-29a	MIMAT0000086	NM_006832	FERMT2	fermitin family homolog 2 (Drosophila)	0	0	0	1	0	0	1	1	0	1	1
hsa-miR-29a	MIMAT0000086	NM_017635	SUV420H1	suppressor of variegation 4-20 homolog 1 (Drosophila)	0	0	0	1	0	0	1	1	0	1	1
hsa-miR-29a	MIMAT0000086	NM_017938	FAM70A	family with sequence similarity 70, member A	0	0	1	0	0	0	1	1	0	1	1
hsa-miR-29a	MIMAT0000086	NM_017699	SIDT1	SID1 transmembrane family, member 1	0	0	1	0	0	0	1	1	0	1	1
hsa-miR-29a	MIMAT0000086	NM_017704	ANKRD49	ankyrin repeat domain 49	0	0	1	1	0	0	0	1	0	1	1
hsa-miR-29a	MIMAT0000086	NM_017759	FLJ20309	hypothetical protein FLJ20309	0	0	1	0	0	0	1	1	0	1	1
hsa-miR-29a	MIMAT0000086	NM_017907	C11orf59	chromosome 11 open reading frame 59	0	0	1	0	0	0	1	1	0	1	1
hsa-miR-29a	MIMAT0000086	NM_006818	MLLT11	myeloid/lymphoid or mixed-lineage leukemia (trithorax homolog, Drosophila); translocated to, 11	0	0	1	0	0	0	1	1	0	1	1
hsa-miR-29a	MIMAT0000086	NM_018176	LGI2	leucine-rich repeat LGI family, member 2	0	0	1	0	0	0	1	1	0	1	1
hsa-miR-29a	MIMAT0000086	NM_006315	PCGF3	polycomb group ring finger 3	0	0	1	0	0	0	1	1	0	1	1
hsa-miR-29a	MIMAT0000086	NM_018910	PCDHA7	protocadherin alpha 7	0	0	0	1	0	0	1	1	0	1	1
hsa-miR-29a	MIMAT0000086	NM_006519	DYNLT1	dynein, light chain, Tctex-type 1	0	0	1	0	0	0	1	1	0	1	1
hsa-miR-29a	MIMAT0000086	NM_006534	NCOA3	nuclear receptor coactivator 3	0	0	1	0	0	0	1	1	0	1	1
hsa-miR-29a	MIMAT0000086	NM_006599	NFAT5	nuclear factor of activated T-cells 5, tonicity-responsive	0	0	1	0	0	0	1	1	0	1	1
hsa-miR-29a	MIMAT0000086	NM_018903	PCDHA12	protocadherin alpha 12	0	0	0	1	0	0	1	1	0	1	1
hsa-miR-29a	MIMAT0000086	NM_006603	STAG2	stromal antigen 2	0	0	1	1	0	0	1	1	0	1	0
hsa-miR-29a	MIMAT0000086	NM_006618	JARID1B	jumonji, AT rich interactive domain 1B	0	0	1	0	0	0	1	1	0	1	1
hsa-miR-29a	MIMAT0000086	NM_018900	PCDHA1	protocadherin alpha 1	0	0	0	1	0	0	1	1	0	1	1
hsa-miR-29a	MIMAT0000086	NM_032242	PLXNA1	plexin A1	0	0	1	0	0	0	1	1	0	1	1
hsa-miR-29a	MIMAT0000086	NM_006628	ARPP-19	cyclic AMP phosphoprotein, 19 kD	0	0	1	0	0	0	1	1	0	1	1
hsa-miR-29a	MIMAT0000086	NM_018689	KIAA1199	KIAA1199	0	0	1	0	0	0	1	1	0	1	1
hsa-miR-29a	MIMAT0000086	NM_006700	TRAFD1	TRAF-type zinc finger domain containing 1	0	0	1	0	0	0	1	1	0	1	1
hsa-miR-29a	MIMAT0000086	NM_018375	SLC39A9	solute carrier family 39 (zinc transporter), member 9	0	0	1	0	0	0	1	1	0	1	1
hsa-miR-29a	MIMAT0000086	NM_006738	AKAP13	A kinase (PRKA) anchor protein 13	0	0	1	0	0	0	1	1	0	1	1
hsa-miR-29a	MIMAT0000086	NM_006763	BTG2	BTG family, member 2	0	0	1	0	0	0	1	1	0	1	1
hsa-miR-29a	MIMAT0000086	NM_018841	GNG12	guanine nucleotide binding protein (G protein), gamma 12	0	0	1	0	0	0	1	1	0	1	1
hsa-miR-29a	MIMAT0000086	NM_018240	KIRREL	kin of IRRE like (Drosophila)	0	0	1	0	0	0	1	1	0	1	1
hsa-miR-29a	MIMAT0000086	NM_013261	PPARGC1A	peroxisome proliferator-activated receptor gamma, coactivator 1 alpha	0	0	1	0	0	0	1	1	0	1	1
hsa-miR-29a	MIMAT0000086	NM_014686	KIAA0355	KIAA0355	0	0	0	1	0	0	1	1	0	1	1
hsa-miR-29a	MIMAT0000086	NM_012199	EIF2C1	eukaryotic translation initiation factor 2C, 1	0	0	1	0	0	0	1	1	0	1	1
hsa-miR-29a	MIMAT0000086	NM_014709	USP34	ubiquitin specific peptidase 34	0	0	1	1	0	0	0	1	0	1	1
hsa-miR-29a	MIMAT0000086	NM_014870	ZBTB40	zinc finger and BTB domain containing 40	0	0	1	1	0	0	1	1	0	1	0
hsa-miR-29a	MIMAT0000086	NM_012110	CHIC2	cysteine-rich hydrophobic domain 2	0	0	1	0	0	0	1	1	0	1	1
hsa-miR-29a	MIMAT0000086	NM_014872	ZBTB5	zinc finger and BTB domain containing 5	0	0	1	0	0	0	1	1	0	1	1
hsa-miR-29a	MIMAT0000086	NM_014876	JOSD1	Josephin domain containing 1	0	0	1	0	0	0	1	1	0	1	1
hsa-miR-29a	MIMAT0000086	NM_014906	PPM1E	protein phosphatase 1E (PP2C domain containing)	0	0	1	0	0	0	1	1	0	1	1
hsa-miR-29a	MIMAT0000086	NM_012104	BACE1	beta-site APP-cleaving enzyme 1	0	0	1	0	0	0	1	1	0	1	1
hsa-miR-29a	MIMAT0000086	NM_014946	SPAST	spastin	0	0	1	0	0	0	1	1	0	1	1
hsa-miR-29a	MIMAT0000086	NM_015035	ZHX3	zinc fingers and homeoboxes 3	0	0	1	1	0	0	0	1	0	1	1
hsa-miR-29a	MIMAT0000086	NM_012234	RYBP	RING1 and YY1 binding protein	0	0	1	0	0	0	1	1	0	1	1
hsa-miR-29a	MIMAT0000086	NM_014631	SH3PXD2A	SH3 and PX domains 2A	0	0	1	1	0	0	0	1	0	1	1
hsa-miR-29a	MIMAT0000086	NM_012308	FBXL11	F-box and leucine-rich repeat protein 11	0	0	1	0	0	0	1	1	0	1	1
hsa-miR-29a	MIMAT0000086	NM_013989	DIO2	deiodinase, iodothyronine, type II	0	0	1	1	0	0	1	1	0	1	0
hsa-miR-29a	MIMAT0000086	NM_012279	ZNF346	zinc finger protein 346	0	0	1	0	0	0	1	1	0	1	1
hsa-miR-29a	MIMAT0000086	NM_014296	CAPN7	calpain 7	0	0	1	0	0	0	1	1	0	1	1
hsa-miR-29a	MIMAT0000086	NM_014299	BRD4	bromodomain containing 4	0	0	1	0	0	0	1	1	0	1	1
hsa-miR-29a	MIMAT0000086	NM_012252	TFEC	transcription factor EC	0	0	1	1	0	0	1	1	0	1	0
hsa-miR-29a	MIMAT0000086	NM_014470	RND1	Rho family GTPase 1	0	0	1	0	0	0	1	1	0	1	1
hsa-miR-29a	MIMAT0000086	NM_014488	RAB30	RAB30, member RAS oncogene family	0	0	0	1	0	0	1	1	0	1	1
hsa-miR-29a	MIMAT0000086	NM_014554	SENP1	SUMO1/sentrin specific peptidase 1	0	0	0	1	0	0	1	1	0	1	1
hsa-miR-29a	MIMAT0000086	NM_014591	KCNIP2	Kv channel interacting protein 2	0	0	1	0	0	0	1	1	0	1	1
hsa-miR-29a	MIMAT0000086	NM_014614	PSME4	proteasome (prosome, macropain) activator subunit 4	0	0	0	1	0	0	1	1	0	1	1
hsa-miR-29a	MIMAT0000086	NM_015051	TXNDC4	thioredoxin domain containing 4 (endoplasmic reticulum)	0	0	1	0	0	0	1	1	0	1	1
hsa-miR-29a	MIMAT0000086	NM_015052	HECW1	HECT, C2 and WW domain containing E3 ubiquitin protein ligase 1	0	0	1	0	0	0	1	1	0	1	1
hsa-miR-29a	MIMAT0000086	NM_012092	ICOS	inducible T-cell co-stimulator	0	0	1	1	0	0	1	1	0	1	0
hsa-miR-29a	MIMAT0000086	NM_016121	KCTD3	potassium channel tetramerisation domain containing 3	0	0	1	0	0	0	1	1	0	1	1
hsa-miR-29a	MIMAT0000086	NM_016257	HPCAL4	hippocalcin like 4	0	0	1	0	0	0	1	1	0	1	1
hsa-miR-29a	MIMAT0000086	NM_016271	RNF138	ring finger protein 138	0	0	1	0	0	0	1	1	0	1	1
hsa-miR-29a	MIMAT0000086	NM_007085	FSTL1	follistatin-like 1	0	0	1	0	0	0	1	1	0	1	1
hsa-miR-29a	MIMAT0000086	NM_016306	DNAJB11	DnaJ (Hsp40) homolog, subfamily B, member 11	0	0	1	0	0	0	1	1	0	1	1
hsa-miR-29a	MIMAT0000086	NM_016308	CMPK1	cytidine monophosphate (UMP-CMP) kinase 1, cytosolic	0	0	1	0	0	0	1	1	0	1	1
hsa-miR-29a	MIMAT0000086	NM_016339	RAPGEFL1	Rap guanine nucleotide exchange factor (GEF)-like 1	0	0	1	0	0	0	1	1	0	1	1
hsa-miR-29a	MIMAT0000086	NM_016396	CTDSPL2	CTD (carboxy-terminal domain, RNA polymerase II, polypeptide A) small phosphatase like 2	0	0	1	0	0	0	1	1	0	1	1
hsa-miR-29a	MIMAT0000086	NM_016480	PAIP2	poly(A) binding protein interacting protein 2	0	0	1	1	0	0	1	1	0	1	0
hsa-miR-29a	MIMAT0000086	NM_016577	RAB6B	RAB6B, member RAS oncogene family	0	0	1	0	0	0	1	1	0	1	1
hsa-miR-29a	MIMAT0000086	NM_016603	FAM13B1	family with sequence similarity 13, member B1	0	0	1	0	0	0	1	1	0	1	1
hsa-miR-29a	MIMAT0000086	NM_014912	CPEB3	cytoplasmic polyadenylation element binding protein 3	0	0	1	0	0	0	1	1	0	1	1
hsa-miR-29a	MIMAT0000086	NM_016094	COMMD2	COMM domain containing 2	0	0	0	1	0	0	1	1	0	1	1
hsa-miR-29a	MIMAT0000086	NM_015294	TRIM37	tripartite motif-containing 37	0	0	1	0	0	0	1	1	0	1	1
hsa-miR-29a	MIMAT0000086	NM_007361	NID2	nidogen 2 (osteonidogen)	0	0	1	0	0	0	1	1	0	1	1
hsa-miR-29a	MIMAT0000086	NM_007249	KLF12	Kruppel-like factor 12	0	0	1	0	0	0	1	1	0	1	1
hsa-miR-29a	MIMAT0000086	NM_015322	FEM1B	fem-1 homolog b (C. elegans)	0	0	1	0	0	0	1	1	0	1	1
hsa-miR-29a	MIMAT0000086	NM_015457	ZDHHC5	zinc finger, DHHC-type containing 5	0	0	0	1	0	0	1	1	0	1	1
hsa-miR-29a	MIMAT0000086	NM_007175	ERLIN2	ER lipid raft associated 2	0	0	1	0	0	0	1	1	0	1	1
hsa-miR-29a	MIMAT0000086	NM_015569	DNM3	dynamin 3	0	0	1	0	0	0	1	1	0	1	1
hsa-miR-29a	MIMAT0000086	NM_015719	COL5A3	collagen, type V, alpha 3	0	0	0	1	0	0	1	1	0	1	1
hsa-miR-29a	MIMAT0000086	NM_015886	PI15	peptidase inhibitor 15	0	0	1	1	0	0	0	1	0	1	1
hsa-miR-29a	MIMAT0000086	NM_016009	SH3GLB1	SH3-domain GRB2-like endophilin B1	0	0	1	1	0	0	0	1	0	1	1
hsa-miR-29a	MIMAT0000086	NM_016083	CNR1	cannabinoid receptor 1 (brain)	0	0	1	0	0	0	1	1	0	1	1
hsa-miR-29a	MIMAT0000086	NM_006943	SOX12	SRY (sex determining region Y)-box 12	0	0	1	0	0	0	1	1	0	1	1
hsa-miR-29a	MIMAT0000086	NM_053023	ZFP91	zinc finger protein 91 homolog (mouse)	0	0	1	0	0	0	1	1	0	1	1
hsa-miR-29a	MIMAT0000086	NM_152335	C15orf27	chromosome 15 open reading frame 27	0	0	1	0	0	0	1	1	0	1	1
hsa-miR-29a	MIMAT0000086	NM_152345	ANKRD13B	ankyrin repeat domain 13B	0	0	1	0	0	0	1	1	0	1	1
hsa-miR-29a	MIMAT0000086	NM_152400	C4orf32	chromosome 4 open reading frame 32	0	0	0	1	0	0	1	1	0	1	1
hsa-miR-29a	MIMAT0000086	NM_152424	FAM123B	family with sequence similarity 123B	0	0	1	0	0	0	1	1	0	1	1
hsa-miR-29a	MIMAT0000086	NM_152493	ZNF362	zinc finger protein 362	0	0	1	0	0	0	1	1	0	1	1
hsa-miR-29a	MIMAT0000086	NM_152556	FLJ31818	hypothetical protein FLJ31818	0	0	1	1	0	0	0	1	0	1	1
hsa-miR-29a	MIMAT0000086	NM_152722	HEPACAM	hepatocyte cell adhesion molecule	0	0	1	0	0	0	1	1	0	1	1
hsa-miR-29a	MIMAT0000086	NM_152758	YTHDF3	YTH domain family, member 3	0	0	1	0	0	0	1	1	0	1	1
hsa-miR-29a	MIMAT0000086	NM_152888	COL22A1	collagen, type XXII, alpha 1	0	0	1	0	0	0	1	1	0	1	1
hsa-miR-29a	MIMAT0000086	NM_153322	PMP22	peripheral myelin protein 22	0	0	1	1	0	0	1	1	0	1	0
hsa-miR-29a	MIMAT0000086	NM_153347	TMEM86A	transmembrane protein 86A	0	0	1	0	0	0	1	1	0	1	1
hsa-miR-29a	MIMAT0000086	NM_153498	CAMK1D	calcium/calmodulin-dependent protein kinase ID	0	0	1	0	0	0	1	1	0	1	1
hsa-miR-29a	MIMAT0000086	NM_153634	CPNE8	copine VIII	0	0	1	0	0	0	1	1	0	1	1
hsa-miR-29a	MIMAT0000086	NM_152320	ZNF641	zinc finger protein 641	0	0	1	0	0	0	1	1	0	1	1
hsa-miR-29a	MIMAT0000086	NM_145754	KIFC2	kinesin family member C2	0	0	1	0	0	0	1	1	0	1	1
hsa-miR-29a	MIMAT0000086	NM_145166	ZBTB47	zinc finger and BTB domain containing 47	0	0	1	0	0	0	1	1	0	1	1
hsa-miR-29a	MIMAT0000086	NM_057161	KLHDC3	kelch domain containing 3	0	0	1	0	0	0	1	1	0	1	1
hsa-miR-29a	MIMAT0000086	NM_057164	COL6A3	collagen, type VI, alpha 3	0	0	1	1	0	0	1	1	0	1	0
hsa-miR-29a	MIMAT0000086	NM_057165	COL6A3	collagen, type VI, alpha 3	0	0	1	1	0	0	1	1	0	1	0
hsa-miR-29a	MIMAT0000086	NM_057167	COL6A3	collagen, type VI, alpha 3	0	0	1	1	0	0	1	1	0	1	0
hsa-miR-29a	MIMAT0000086	NM_058241	CCNT2	cyclin T2	0	0	1	1	0	0	1	1	0	1	0
hsa-miR-29a	MIMAT0000086	NM_078485	COL9A1	collagen, type IX, alpha 1	0	0	1	1	0	0	1	1	0	1	0
hsa-miR-29a	MIMAT0000086	NM_133171	ELMO2	engulfment and cell motility 2	0	0	1	0	0	0	1	1	0	1	1
hsa-miR-29a	MIMAT0000086	NM_138473	SP1	Sp1 transcription factor	0	0	1	0	0	0	1	1	0	1	1
hsa-miR-29a	MIMAT0000086	NM_138730	HMGN3	high mobility group nucleosomal binding domain 3	0	0	1	1	0	0	1	1	0	1	0
hsa-miR-29a	MIMAT0000086	NM_138774	C19orf22	chromosome 19 open reading frame 22	0	0	1	0	0	0	1	1	0	1	1
hsa-miR-29a	MIMAT0000086	NM_138967	SCAMP5	secretory carrier membrane protein 5	0	0	1	0	0	0	1	1	0	1	1
hsa-miR-29a	MIMAT0000086	NM_139321	ATRN	attractin	0	0	1	0	0	0	1	1	0	1	1
hsa-miR-29a	MIMAT0000086	NM_145117	NAV2	neuron navigator 2	0	0	0	1	0	0	1	1	0	1	1
hsa-miR-29a	MIMAT0000086	NM_172164	NASP	nuclear autoantigenic sperm protein (histone-binding)	0	0	1	1	0	0	1	1	0	1	0
hsa-miR-29a	MIMAT0000086	NM_172171	CAMK2G	calcium/calmodulin-dependent protein kinase (CaM kinase) II gamma	0	0	1	1	0	0	1	1	0	1	0
hsa-miR-29a	MIMAT0000086	NM_198212	CAV2	caveolin 2	0	0	1	1	0	0	1	1	0	1	0
hsa-miR-29a	MIMAT0000086	NM_198336	INSIG1	insulin induced gene 1	0	0	1	1	0	0	1	1	0	1	0
hsa-miR-29a	MIMAT0000086	NM_198501	SMTNL2	smoothelin-like 2	0	0	0	1	0	0	1	1	0	1	1
hsa-miR-29a	MIMAT0000086	NM_198573	C9orf165	chromosome 9 open reading frame 165	0	0	1	0	0	0	1	1	0	1	1
hsa-miR-29a	MIMAT0000086	NM_198686	RAB15	RAB15, member RAS onocogene family	0	0	1	0	0	0	1	1	0	1	1
hsa-miR-29a	MIMAT0000086	NM_198859	PRICKLE2	prickle homolog 2 (Drosophila)	0	0	1	0	0	0	1	1	0	1	1
hsa-miR-29a	MIMAT0000086	NM_199327	SPRY1	sprouty homolog 1, antagonist of FGF signaling (Drosophila)	0	0	1	1	0	0	1	1	0	1	0
hsa-miR-29a	MIMAT0000086	NM_199355	ADAMTS18	ADAM metallopeptidase with thrombospondin type 1 motif, 18	0	0	1	0	0	0	1	1	0	1	1
hsa-miR-29a	MIMAT0000086	NM_201999	ELF2	E74-like factor 2 (ets domain transcription factor)	0	0	1	1	0	0	1	1	0	1	0
hsa-miR-29a	MIMAT0000086	NM_203406	LOC153364	similar to metallo-beta-lactamase superfamily protein	0	0	1	0	0	0	1	1	0	1	1
hsa-miR-29a	MIMAT0000086	NM_206839	MORF4L1	mortality factor 4 like 1	0	0	1	1	0	0	1	1	0	1	0
hsa-miR-29a	MIMAT0000086	NM_206854	QKI	quaking homolog, KH domain RNA binding (mouse)	0	0	1	1	0	0	1	1	0	1	0
hsa-miR-29a	MIMAT0000086	NM_207363	NAP5	Nck-associated protein 5	0	0	1	1	0	0	0	1	0	1	1
hsa-miR-29a	MIMAT0000086	NM_197941	ADAMTS6	ADAM metallopeptidase with thrombospondin type 1 motif, 6	0	0	1	0	0	0	1	1	0	1	1
hsa-miR-29a	MIMAT0000086	NM_194291	TMEM65	transmembrane protein 65	0	0	1	0	0	0	1	1	0	1	1
hsa-miR-29a	MIMAT0000086	NM_194285	SPTY2D1	SPT2, Suppressor of Ty, domain containing 1 (S. cerevisiae)	0	0	1	0	0	0	1	1	0	1	1
hsa-miR-29a	MIMAT0000086	NM_173082	SHPRH	SNF2 histone linker PHD RING helicase	0	0	1	0	0	0	1	1	0	1	1
hsa-miR-29a	MIMAT0000086	NM_173491	LSM11	LSM11, U7 small nuclear RNA associated	0	0	1	0	0	0	1	1	0	1	1
hsa-miR-29a	MIMAT0000086	NM_173510	CCDC117	coiled-coil domain containing 117	0	0	1	0	0	0	1	1	0	1	1
hsa-miR-29a	MIMAT0000086	NM_173822	FAM126B	family with sequence similarity 126, member B	0	0	1	0	0	0	1	1	0	1	1
hsa-miR-29a	MIMAT0000086	NM_175629	DNMT3A	DNA (cytosine-5-)-methyltransferase 3 alpha	0	0	1	1	0	0	1	1	0	1	0
hsa-miR-29a	MIMAT0000086	NM_175849	DNMT3B	DNA (cytosine-5-)-methyltransferase 3 beta	0	0	1	1	0	0	1	1	0	1	0
hsa-miR-29a	MIMAT0000086	NM_178012	TUBB2B	tubulin, beta 2B	0	0	1	0	0	0	1	1	0	1	1
hsa-miR-29a	MIMAT0000086	NM_178151	DCX	doublecortex; lissencephaly, X-linked (doublecortin)	0	0	1	1	0	0	1	1	0	1	0
hsa-miR-29a	MIMAT0000086	NM_178152	DCX	doublecortex; lissencephaly, X-linked (doublecortin)	0	0	1	1	0	0	1	1	0	1	0
hsa-miR-29a	MIMAT0000086	NM_178554	KY	kyphoscoliosis peptidase	0	0	1	0	0	0	1	1	0	1	1
hsa-miR-29a	MIMAT0000086	NM_182763	MCL1	myeloid cell leukemia sequence 1 (BCL2-related)	0	0	1	0	0	0	1	1	0	1	1
hsa-miR-29a	MIMAT0000086	NM_182920	ADAMTS9	ADAM metallopeptidase with thrombospondin type 1 motif, 9	0	0	0	1	0	0	1	1	0	1	1
hsa-miR-29a	MIMAT0000086	NM_183376	ARRDC4	arrestin domain containing 4	0	0	1	0	0	0	1	1	0	1	1
hsa-miR-29a	MIMAT0000086	NM_207645	LOC399947	similar to expressed sequence AI593442	0	0	1	0	0	0	1	1	0	1	1
hsa-miR-29a	MIMAT0000086	NM_018999	KIAA1128	KIAA1128	0	0	1	0	0	0	1	1	0	1	1
hsa-miR-29a	MIMAT0000086	NM_022480	KLHL25	kelch-like 25 (Drosophila)	0	0	1	0	0	0	1	1	0	1	1
hsa-miR-29a	MIMAT0000086	NM_022726	ELOVL4	elongation of very long chain fatty acids (FEN1/Elo2, SUR4/Elo3, yeast)-like 4	0	0	1	0	0	0	1	1	0	1	1
hsa-miR-29a	MIMAT0000086	NM_022841	RFXDC2	regulatory factor X domain containing 2	0	0	1	1	0	0	0	1	0	1	1
hsa-miR-29a	MIMAT0000086	NM_024076	KCTD15	potassium channel tetramerisation domain containing 15	0	0	1	0	0	0	1	1	0	1	1
hsa-miR-29a	MIMAT0000086	NM_024089	KDELC1	KDEL (Lys-Asp-Glu-Leu) containing 1	0	0	0	1	0	0	1	1	0	1	1
hsa-miR-29a	MIMAT0000086	NM_024749	VASH2	vasohibin 2	0	0	1	0	0	0	1	1	0	1	1
hsa-miR-29a	MIMAT0000086	NM_024771	NAT11	N-acetyltransferase 11	0	0	0	1	0	0	1	1	0	1	1
hsa-miR-29a	MIMAT0000086	NM_025073	RP5-1000E10.4	suppressor of IKK epsilon	0	0	1	0	0	0	1	1	0	1	1
hsa-miR-29a	MIMAT0000086	NM_025074	FRAS1	Fraser syndrome 1	0	0	1	0	0	0	1	1	0	1	1
hsa-miR-29a	MIMAT0000086	NM_025138	C13orf23	chromosome 13 open reading frame 23	0	0	1	0	0	0	1	1	0	1	1
hsa-miR-29a	MIMAT0000086	NM_025160	WDR26	WD repeat domain 26	0	0	1	0	0	0	1	1	0	1	1
hsa-miR-29a	MIMAT0000086	NM_030621	DICER1	dicer 1, ribonuclease type III	0	0	1	0	0	0	1	1	0	1	1
hsa-miR-29a	MIMAT0000086	NM_030625	TET1	tet oncogene 1	0	0	0	1	0	0	1	1	0	1	1
hsa-miR-29a	MIMAT0000086	NM_022462	HIF3A	hypoxia inducible factor 3, alpha subunit	0	0	0	1	0	0	1	1	0	1	1
hsa-miR-29a	MIMAT0000086	NM_022060	ABHD4	abhydrolase domain containing 4	0	0	1	0	0	0	1	1	0	1	1
hsa-miR-29a	MIMAT0000086	NM_021813	BACH2	BTB and CNC homology 1, basic leucine zipper transcription factor 2	0	0	1	0	0	0	1	1	0	1	1
hsa-miR-29a	MIMAT0000086	NM_019593	RP5-1022P6.2	hypothetical protein KIAA1434	0	0	1	0	0	0	1	1	0	1	1
hsa-miR-29a	MIMAT0000086	NM_020133	AGPAT4	1-acylglycerol-3-phosphate O-acyltransferase 4 (lysophosphatidic acid acyltransferase, delta)	0	0	0	1	0	0	1	1	0	1	1
hsa-miR-29a	MIMAT0000086	NM_020199	C5orf15	chromosome 5 open reading frame 15	0	0	1	0	0	0	1	1	0	1	1
hsa-miR-29a	MIMAT0000086	NM_020354	ENTPD7	ectonucleoside triphosphate diphosphohydrolase 7	0	0	1	0	0	0	1	1	0	1	1
hsa-miR-29a	MIMAT0000086	NM_020438	DOLPP1	dolichyl pyrophosphate phosphatase 1	0	0	1	0	0	0	1	1	0	1	1
hsa-miR-29a	MIMAT0000086	NM_020463	SMEK2	SMEK homolog 2, suppressor of mek1 (Dictyostelium)	0	0	1	0	0	0	1	1	0	1	1
hsa-miR-29a	MIMAT0000086	NM_020713	ZNF512B	zinc finger protein 512B	0	0	1	0	0	0	1	1	0	1	1
hsa-miR-29a	MIMAT0000086	NM_020830	WDFY1	WD repeat and FYVE domain containing 1	0	0	1	0	0	0	1	1	0	1	1
hsa-miR-29a	MIMAT0000086	NM_020845	PITPNM2	phosphatidylinositol transfer protein, membrane-associated 2	0	0	1	0	0	0	1	1	0	1	1
hsa-miR-29a	MIMAT0000086	NM_020918	GPAM	glycerol-3-phosphate acyltransferase, mitochondrial	0	0	1	0	0	0	1	1	0	1	1
hsa-miR-29a	MIMAT0000086	NM_020935	USP37	ubiquitin specific peptidase 37	0	0	1	0	0	0	1	1	0	1	1
hsa-miR-29a	MIMAT0000086	NM_021101	CLDN1	claudin 1	0	0	0	1	0	0	1	1	0	1	1
hsa-miR-29a	MIMAT0000086	NM_021137	TNFAIP1	tumor necrosis factor, alpha-induced protein 1 (endothelial)	0	0	1	0	0	0	1	1	0	1	1
hsa-miR-29a	MIMAT0000086	NM_030645	SH3BP5L	SH3-binding domain protein 5-like	0	0	1	0	0	0	1	1	0	1	1
hsa-miR-29a	MIMAT0000086	NM_030806	C1orf21	chromosome 1 open reading frame 21	0	0	1	0	0	0	1	1	0	1	1
hsa-miR-29a	MIMAT0000086	NM_032575	GLIS2	GLIS family zinc finger 2	0	0	1	0	0	0	1	1	0	1	1
hsa-miR-29a	MIMAT0000086	NM_032588	TRIM63	tripartite motif-containing 63	0	0	0	1	0	0	1	1	0	1	1
hsa-miR-29a	MIMAT0000086	NM_032646	TTYH2	tweety homolog 2 (Drosophila)	0	0	1	0	0	0	1	1	0	1	1
hsa-miR-29a	MIMAT0000086	NM_032822	FAM136A	family with sequence similarity 136, member A	0	0	0	1	0	0	1	1	0	1	1
hsa-miR-29a	MIMAT0000086	NM_032833	PPP1R15B	protein phosphatase 1, regulatory (inhibitor) subunit 15B	0	0	1	0	0	0	1	1	0	1	1
hsa-miR-29a	MIMAT0000086	NM_032854	CORO6	coronin 6	0	0	1	0	0	0	1	1	0	1	1
hsa-miR-29a	MIMAT0000086	NM_033071	SYNE1	spectrin repeat containing, nuclear envelope 1	0	0	1	0	0	0	1	1	0	1	1
hsa-miR-29a	MIMAT0000086	NM_033150	COL2A1	collagen, type II, alpha 1	0	0	1	1	0	0	1	1	0	1	0
hsa-miR-29a	MIMAT0000086	NM_033274	ADAM19	ADAM metallopeptidase domain 19 (meltrin beta)	0	0	1	0	0	0	1	1	0	1	1
hsa-miR-29a	MIMAT0000086	NM_033285	TP53INP1	tumor protein p53 inducible nuclear protein 1	0	0	1	0	0	0	1	1	0	1	1
hsa-miR-29a	MIMAT0000086	NM_033380	COL4A5	collagen, type IV, alpha 5 (Alport syndrome)	0	0	1	1	0	0	1	1	0	1	0
hsa-miR-29a	MIMAT0000086	NM_033503	BMF	Bcl2 modifying factor	0	0	1	1	0	0	1	1	0	1	0
hsa-miR-29a	MIMAT0000086	NM_033631	LUZP1	leucine zipper protein 1	0	0	1	0	0	0	1	1	0	1	1
hsa-miR-29a	MIMAT0000086	NM_032558	HIATL1	hippocampus abundant transcript-like 1	0	0	1	0	0	0	1	1	0	1	1
hsa-miR-29a	MIMAT0000086	NM_032552	DAB2IP	DAB2 interacting protein	0	0	1	0	0	0	1	1	0	1	1
hsa-miR-29a	MIMAT0000086	NM_032505	KBTBD8	kelch repeat and BTB (POZ) domain containing 8	0	0	1	0	0	0	1	1	0	1	1
hsa-miR-29a	MIMAT0000086	NM_030809	FAM130A1	family with sequence similarity 130, member A1	0	0	1	0	0	0	1	1	0	1	1
hsa-miR-29a	MIMAT0000086	NM_031362	COL4A3	collagen, type IV, alpha 3 (Goodpasture antigen)	0	0	1	1	0	0	1	1	0	1	0
hsa-miR-29a	MIMAT0000086	NM_031365	COL4A3	collagen, type IV, alpha 3 (Goodpasture antigen)	0	0	1	1	0	0	1	1	0	1	0
hsa-miR-29a	MIMAT0000086	NM_031366	COL4A3	collagen, type IV, alpha 3 (Goodpasture antigen)	0	0	1	1	0	0	1	1	0	1	0
hsa-miR-29a	MIMAT0000086	NM_031411	PCDHA1	protocadherin alpha 1	0	0	1	1	0	0	1	1	0	1	0
hsa-miR-29a	MIMAT0000086	NM_031461	CRISPLD1	cysteine-rich secretory protein LCCL domain containing 1	0	0	0	1	0	0	1	1	0	1	1
hsa-miR-29a	MIMAT0000086	NM_031478	FAM57B	family with sequence similarity 57, member B	0	0	1	0	0	0	1	1	0	1	1
hsa-miR-29a	MIMAT0000086	NM_031857	PCDHA9	protocadherin alpha 9	0	0	1	1	0	0	1	1	0	1	0
hsa-miR-29a	MIMAT0000086	NM_031860	PCDHA10	protocadherin alpha 10	0	0	1	1	0	0	1	1	0	1	0
hsa-miR-29a	MIMAT0000086	NM_031910	C1QTNF6	C1q and tumor necrosis factor related protein 6	0	0	1	0	0	0	1	1	0	1	1
hsa-miR-29a	MIMAT0000086	NM_031935	HMCN1	hemicentin 1	0	0	0	1	0	0	1	1	0	1	1
hsa-miR-29a	MIMAT0000086	NM_032246	MEX3B	mex-3 homolog B (C. elegans)	0	0	0	1	0	0	1	1	0	1	1
hsa-miR-29a	MIMAT0000086	NM_032287	LDOC1L	leucine zipper, down-regulated in cancer 1-like	0	0	1	0	0	0	1	1	0	1	1
hsa-miR-29a	MIMAT0000086	NM_053002	MED12L	mediator complex subunit 12-like	0	0	0	1	0	0	1	1	0	1	1
hsa-miR-29a	MIMAT0000086	NM_003459	SLC30A3	solute carrier family 30 (zinc transporter), member 3	0	0	1	0	0	0	1	1	0	1	1
hsa-miR-29a	MIMAT0000086	NM_003651	CSDA	cold shock domain protein A	0	0	1	0	0	0	1	1	0	1	1
hsa-miR-29a	MIMAT0000086	NM_212551	LYSMD1	LysM, putative peptidoglycan-binding, domain containing 1	0	0	1	1	0	0	0	1	0	1	1
hsa-miR-29a	MIMAT0000086	NM_001079809	TMEM183B	transmembrane protein 183B	0	0	1	1	0	0	0	1	0	1	1
hsa-miR-29a	MIMAT0000086	NM_001875	CPS1	carbamoyl-phosphate synthetase 1, mitochondrial	0	0	1	1	0	0	1	1	0	1	0
hsa-miR-29a	MIMAT0000086	NM_003690	PRKRA	protein kinase, interferon-inducible double stranded RNA dependent activator	0	0	1	0	0	0	1	1	0	1	1
hsa-miR-29a	MIMAT0000086	NM_001918	DBT	dihydrolipoamide branched chain transacylase E2	0	0	0	1	0	0	1	1	0	1	1
hsa-miR-29a	MIMAT0000086	NM_002556	OSBP	oxysterol binding protein	0	0	0	1	0	0	1	1	0	1	1
hsa-miR-29a	MIMAT0000086	NM_004863	SPTLC2	serine palmitoyltransferase, long chain base subunit 2	0	0	1	0	0	0	1	1	0	1	1
hsa-miR-29a	MIMAT0000086	NM_001077238	SPPL2B	signal peptide peptidase-like 2B	0	0	1	1	0	0	0	1	0	1	1
hsa-miR-29a	MIMAT0000086	NM_001945	HBEGF	heparin-binding EGF-like growth factor	0	0	1	0	0	0	1	1	0	1	1
hsa-miR-29a	MIMAT0000086	NM_003648	DGKD	diacylglycerol kinase, delta 130kDa	0	0	1	0	0	0	1	1	0	1	1
hsa-miR-29a	MIMAT0000086	NM_003631	PARG	poly (ADP-ribose) glycohydrolase	0	0	1	1	0	0	0	1	0	1	1
hsa-miR-29a	MIMAT0000086	NM_005184	CALM3	calmodulin 3 (phosphorylase kinase, delta)	0	0	1	0	0	0	1	1	0	1	1
hsa-miR-29a	MIMAT0000086	NM_002725	PRELP	proline/arginine-rich end leucine-rich repeat protein	0	0	1	0	0	0	1	1	0	1	1
hsa-miR-29a	MIMAT0000086	NM_001759	CCND2	cyclin D2	0	0	1	0	0	0	1	1	0	1	1
hsa-miR-29a	MIMAT0000086	NM_001128	AP1G1	adaptor-related protein complex 1, gamma 1 subunit	0	0	1	1	0	0	1	1	0	1	0
hsa-miR-29a	MIMAT0000086	NM_001855	COL15A1	collagen, type XV, alpha 1	0	0	0	1	0	0	1	1	0	1	1
hsa-miR-29a	MIMAT0000086	NM_001037535	SCML1	sex comb on midleg-like 1 (Drosophila)	0	0	1	1	0	0	0	1	0	1	1
hsa-miR-29a	MIMAT0000086	NM_002616	PER1	period homolog 1 (Drosophila)	0	0	1	0	0	0	1	1	0	1	1
hsa-miR-29a	MIMAT0000086	NM_003477	PDHX	pyruvate dehydrogenase complex, component X	0	0	0	1	0	0	1	1	0	1	1
hsa-miR-29a	MIMAT0000086	NM_003575	ZNF282	zinc finger protein 282	0	0	0	1	0	0	1	1	0	1	1
hsa-miR-29a	MIMAT0000086	NM_002609	PDGFRB	platelet-derived growth factor receptor, beta polypeptide	0	0	1	0	0	0	1	1	0	1	1
hsa-miR-29a	MIMAT0000086	NM_002466	MYBL2	v-myb myeloblastosis viral oncogene homolog (avian)-like 2	0	0	1	0	0	0	1	1	0	1	1
hsa-miR-29a	MIMAT0000086	NM_002403	MFAP2	microfibrillar-associated protein 2	0	0	1	0	0	0	1	1	0	1	1
hsa-miR-29a	MIMAT0000086	NM_004538	NAP1L3	nucleosome assembly protein 1-like 3	0	0	1	0	0	0	1	1	0	1	1
hsa-miR-29a	MIMAT0000086	NM_004530	MMP2	matrix metallopeptidase 2 (gelatinase A, 72kDa gelatinase, 72kDa type IV collagenase)	0	0	1	0	0	0	1	1	0	1	1
hsa-miR-29a	MIMAT0000086	NM_004443	EPHB3	EPH receptor B3	0	0	1	0	0	0	1	1	0	1	1
hsa-miR-29a	MIMAT0000086	NM_004171	SLC1A2	solute carrier family 1 (glial high affinity glutamate transporter), member 2	0	0	1	0	0	0	1	1	0	1	1
hsa-miR-29a	MIMAT0000086	NM_001856	COL16A1	collagen, type XVI, alpha 1	0	0	1	0	0	0	1	1	0	1	1
hsa-miR-29a	MIMAT0000086	NM_004426	PHC1	polyhomeotic homolog 1 (Drosophila)	0	0	1	0	0	0	1	1	0	1	1
hsa-miR-29a	MIMAT0000086	NM_001039802	CDC42	cell division cycle 42 (GTP binding protein, 25kDa)	0	0	1	1	0	0	0	1	0	1	1
hsa-miR-29a	MIMAT0000086	NM_004393	DAG1	dystroglycan 1 (dystrophin-associated glycoprotein 1)	0	0	1	0	0	0	1	1	0	1	1
hsa-miR-29a	MIMAT0000086	NM_004235	KLF4	Kruppel-like factor 4 (gut)	0	0	0	1	0	0	1	1	0	1	1
hsa-miR-29a	MIMAT0000086	NM_004295	TRAF4	TNF receptor-associated factor 4	0	0	1	0	0	0	1	1	0	1	1
hsa-miR-29a	MIMAT0000086	NM_001003942	BMF	Bcl2 modifying factor	0	0	1	1	0	0	1	1	0	1	0
hsa-miR-29a	MIMAT0000086	NM_004603	STX1A	syntaxin 1A (brain)	0	0	1	0	0	0	1	1	0	1	1
hsa-miR-29a	MIMAT0000086	NM_001065	TNFRSF1A	tumor necrosis factor receptor superfamily, member 1A	0	0	0	1	0	0	1	1	0	1	1
hsa-miR-29a	MIMAT0000086	NM_002715	PPP2CA	protein phosphatase 2 (formerly 2A), catalytic subunit, alpha isoform	0	0	1	0	0	0	1	1	0	1	1
hsa-miR-29a	MIMAT0000086	NM_004798	KIF3B	kinesin family member 3B	0	0	1	0	0	0	1	1	0	1	1
hsa-miR-29a	MIMAT0000086	NM_004731	SLC16A7	solute carrier family 16, member 7 (monocarboxylic acid transporter 2)	0	0	1	0	0	0	1	1	0	1	1
hsa-miR-29a	MIMAT0000086	NM_001001974	PLEKHA1	pleckstrin homology domain containing, family A (phosphoinositide binding specific) member 1	0	0	1	0	0	0	1	1	0	1	1
hsa-miR-29a	MIMAT0000086	NM_002039	GAB1	GRB2-associated binding protein 1	0	0	0	1	0	0	1	1	0	1	1
hsa-miR-29a	MIMAT0000086	NM_001042749	STAG2	stromal antigen 2	0	0	1	1	0	0	0	1	0	1	1
hsa-miR-29a	MIMAT0000086	NM_002130	HMGCS1	3-hydroxy-3-methylglutaryl-Coenzyme A synthase 1 (soluble)	0	0	0	1	0	0	1	1	0	1	1
hsa-miR-29a	MIMAT0000086	NM_001008537	KIAA2022	KIAA2022	0	0	1	1	0	0	0	1	0	1	1
hsa-miR-29a	MIMAT0000086	NM_004687	MTMR4	myotubularin related protein 4	0	0	1	0	0	0	1	1	0	1	1
hsa-miR-29a	MIMAT0000086	NM_002293	LAMC1	laminin, gamma 1 (formerly LAMB2)	0	0	1	0	0	0	1	1	0	1	1
hsa-miR-29a	MIMAT0000086	NM_000230	LEP	leptin	0	0	1	0	0	0	1	1	0	1	1
hsa-miR-29a	MIMAT0000086	NM_000084	CLCN5	chloride channel 5 (nephrolithiasis 2, X-linked, Dent disease)	0	0	1	1	0	0	0	1	0	1	1
hsa-miR-29a	MIMAT0000086	NM_000332	ATXN1	ataxin 1	0	0	1	0	0	0	1	1	0	1	1
hsa-miR-29a	MIMAT0000086	NM_003239	TGFB3	transforming growth factor, beta 3	0	0	1	0	0	0	1	1	0	1	1
hsa-miR-29a	MIMAT0000086	NM_000386	BLMH	bleomycin hydrolase	0	0	0	1	0	0	1	1	0	1	1
hsa-miR-29a	MIMAT0000086	NM_005595	NFIA	nuclear factor I/A	0	0	0	1	0	0	1	1	0	1	1
hsa-miR-29a	MIMAT0000086	NM_001025366	VEGFA	vascular endothelial growth factor A	0	0	1	1	0	0	0	1	0	1	1
hsa-miR-29a	MIMAT0000086	NM_001259	CDK6	cyclin-dependent kinase 6	0	0	1	0	0	0	1	1	0	1	1
hsa-miR-29a	MIMAT0000086	NM_001033112	PAIP2	poly(A) binding protein interacting protein 2	0	0	1	1	0	0	0	1	0	1	1
hsa-miR-29a	MIMAT0000086	NM_001662	ARF5	ADP-ribosylation factor 5	0	0	1	0	0	0	1	1	0	1	1
hsa-miR-29a	MIMAT0000086	NM_001543	NDST1	N-deacetylase/N-sulfotransferase (heparan glucosaminyl) 1	0	0	1	0	0	0	1	1	0	1	1
hsa-miR-29a	MIMAT0000086	NM_006224	PITPNA	phosphatidylinositol transfer protein, alpha	0	0	1	0	0	0	1	1	0	1	1
hsa-miR-29a	MIMAT0000086	NM_006037	HDAC4	histone deacetylase 4	0	0	0	1	0	0	1	1	0	1	1
hsa-miR-29a	MIMAT0000086	NM_003118	SPARC	secreted protein, acidic, cysteine-rich (osteonectin)	0	0	0	0	0	1	1	1	0	1	1
hsa-miR-29a	MIMAT0000086	NM_003051	SLC16A1	solute carrier family 16, member 1 (monocarboxylic acid transporter 1)	0	0	1	0	0	0	1	1	0	1	1
hsa-miR-29a	MIMAT0000086	NM_001649	SHROOM2	shroom family member 2	0	0	1	0	0	0	1	1	0	1	1
hsa-miR-29a	MIMAT0000086	NM_000093	COL5A1	collagen, type V, alpha 1	0	0	1	1	0	0	0	1	0	1	1
hsa-miR-29a	MIMAT0000086	NM_003174	SVIL	supervillin	0	0	1	0	0	0	1	1	0	1	1
hsa-miR-29a	MIMAT0000086	NM_000237	LPL	lipoprotein lipase	0	0	0	1	0	0	1	1	0	1	1
hsa-miR-29a	MIMAT0000086	NM_000088	COL1A1	collagen, type I, alpha 1	0	0	1	0	0	0	1	1	0	1	1
hsa-miR-29a	MIMAT0000086	NM_000495	COL4A5	collagen, type IV, alpha 5 (Alport syndrome)	0	0	0	1	0	0	1	1	0	1	1
hsa-miR-29a	MIMAT0000086	NM_000319	PEX5	peroxisomal biogenesis factor 5	0	0	1	0	0	0	1	1	0	1	1
hsa-miR-29a	MIMAT0000086	NM_000533	PLP1	proteolipid protein 1 (Pelizaeus-Merzbacher disease, spastic paraplegia 2, uncomplicated)	0	0	1	0	0	0	1	1	0	1	1
hsa-miR-29a	MIMAT0000086	NM_000916	OXTR	oxytocin receptor	0	0	1	0	0	0	1	1	0	1	1
hsa-miR-29a	MIMAT0000086	NM_005378	MYCN	v-myc myelocytomatosis viral related oncogene, neuroblastoma derived (avian)	0	0	0	1	0	0	1	1	0	1	1
hsa-miR-29a	MIMAT0000086	NM_005233	EPHA3	EPH receptor A3	0	0	1	0	0	0	1	1	0	1	1
hsa-miR-29a	MIMAT0000086	NM_006238	PPARD	peroxisome proliferator-activated receptor delta	0	0	1	0	0	0	1	1	0	1	1
hsa-miR-29a	MIMAT0000086	NM_001682	ATP2B1	ATPase, Ca++ transporting, plasma membrane 1	0	0	1	0	0	0	1	1	0	1	1
hsa-miR-29a	MIMAT0000086	NM_005402	RALA	v-ral simian leukemia viral oncogene homolog A (ras related)	0	0	1	0	0	0	1	1	0	1	1
hsa-miR-29a	MIMAT0000086	NM_001233	CAV2	caveolin 2	0	0	0	1	0	0	1	1	0	1	1
hsa-miR-29a	MIMAT0000086	NM_001677	ATP1B1	ATPase, Na+/K+ transporting, beta 1 polypeptide	0	0	1	0	0	0	1	1	0	1	1
hsa-miR-29a	MIMAT0000086	NM_005542	INSIG1	insulin induced gene 1	0	0	1	1	0	0	1	1	0	1	0
hsa-miR-29a	MIMAT0000086	NM_005465	AKT3	v-akt murine thymoma viral oncogene homolog 3 (protein kinase B, gamma)	0	0	1	0	0	0	1	1	0	1	1
hsa-miR-29a	MIMAT0000086	NM_005461	MAFB	v-maf musculoaponeurotic fibrosarcoma oncogene homolog B (avian)	0	0	1	0	0	0	1	1	0	1	1
hsa-miR-29a	MIMAT0000086	NM_006242	PPP1R3D	protein phosphatase 1, regulatory (inhibitor) subunit 3D	0	0	1	0	0	0	1	1	0	1	1
hsa-miR-29a	MIMAT0000086	NM_001670	ARVCF	armadillo repeat gene deletes in velocardiofacial syndrome	0	0	0	1	0	0	1	1	0	1	1
hsa-miR-29a	MIMAT0000086	NM_001241	CCNT2	cyclin T2	0	0	0	1	0	0	1	1	0	1	1
hsa-miR-29a	MIMAT0000086	NM_001039877	STRN4	striatin, calmodulin binding protein 4	0	0	1	0	0	0	0	1	0	1	1
hsa-miR-29a	MIMAT0000086	NM_001032380	RHOBTB1	Rho-related BTB domain containing 1	0	0	1	0	0	0	0	1	0	1	1
hsa-miR-29a	MIMAT0000086	NM_001031748	C12orf40	chromosome 12 open reading frame 40	0	0	1	1	0	0	0	1	0	1	0
hsa-miR-29a	MIMAT0000086	NM_080730	IFFO	intermediate filament family orphan	0	0	1	0	0	0	1	1	0	1	0
hsa-miR-29a	MIMAT0000086	NM_080723	NRSN1	neurensin 1	0	0	0	0	0	0	1	1	0	1	1
hsa-miR-29a	MIMAT0000086	NM_080630	COL11A1	collagen, type XI, alpha 1	0	0	0	1	0	0	1	1	0	1	0
hsa-miR-29a	MIMAT0000086	NM_144967	RP13-102H20.1	hypothetical protein FLJ30058	0	0	0	0	0	0	1	1	0	1	1
hsa-miR-29a	MIMAT0000086	NM_144767	AKAP13	A kinase (PRKA) anchor protein 13	0	0	1	0	0	0	1	1	0	1	0
hsa-miR-29a	MIMAT0000086	NM_080629	COL11A1	collagen, type XI, alpha 1	0	0	0	1	0	0	1	1	0	1	0
hsa-miR-29a	MIMAT0000086	NM_078483	SLC36A1	solute carrier family 36 (proton/amino acid symporter), member 1	0	0	1	1	0	0	0	1	0	1	0
hsa-miR-29a	MIMAT0000086	NM_144973	MGC24039	hypothetical protein MGC24039	0	0	1	0	0	0	1	1	0	1	0
hsa-miR-29a	MIMAT0000086	NM_144732	HNRNPUL1	heterogeneous nuclear ribonucleoprotein U-like 1	0	0	1	0	0	0	1	1	0	1	0
hsa-miR-29a	MIMAT0000086	NM_139057	ADAMTS17	ADAM metallopeptidase with thrombospondin type 1 motif, 17	0	0	1	1	0	0	0	1	0	1	0
hsa-miR-29a	MIMAT0000086	NM_133650	SYNE1	spectrin repeat containing, nuclear envelope 1	0	0	1	0	0	0	1	1	0	1	0
hsa-miR-29a	MIMAT0000086	NM_138383	ABBA-1	actin-bundling protein with BAIAP2 homology	0	0	1	0	0	0	0	1	0	1	1
hsa-miR-29a	MIMAT0000086	NM_001037540	SCML1	sex comb on midleg-like 1 (Drosophila)	0	0	1	1	0	0	0	1	0	1	0
hsa-miR-29a	MIMAT0000086	NM_001037172	ACPL2	acid phosphatase-like 2	0	0	1	1	0	0	0	1	0	1	0
hsa-miR-29a	MIMAT0000086	NM_001037330	TRIM16L	tripartite motif-containing 16-like	0	0	1	1	0	0	0	1	0	1	0
hsa-miR-29a	MIMAT0000086	NM_138713	NFAT5	nuclear factor of activated T-cells 5, tonicity-responsive	0	0	1	0	0	0	1	1	0	1	0
hsa-miR-29a	MIMAT0000086	NM_138786	TM4SF18	transmembrane 4 L six family member 18	0	0	1	1	0	0	0	1	0	1	0
hsa-miR-29a	MIMAT0000086	NM_001033756	VEGFA	vascular endothelial growth factor A	0	0	1	1	0	0	0	1	0	1	0
hsa-miR-29a	MIMAT0000086	NM_133631	ROBO1	roundabout, axon guidance receptor, homolog 1 (Drosophila)	0	0	1	1	0	0	0	1	0	1	0
hsa-miR-29a	MIMAT0000086	NM_133377	RAD1	RAD1 homolog (S. pombe)	0	0	1	1	0	0	0	1	0	1	0
hsa-miR-29a	MIMAT0000086	NM_001033026	C19orf6	chromosome 19 open reading frame 6	0	0	1	0	0	0	0	1	0	1	1
hsa-miR-29a	MIMAT0000086	NM_080731	IFFO	intermediate filament family orphan	0	0	1	0	0	0	1	1	0	1	0
hsa-miR-29a	MIMAT0000086	NM_080744	SRCRB4D	scavenger receptor cysteine rich domain containing, group B (4 domains)	0	0	1	0	0	0	0	1	0	1	1
hsa-miR-29a	MIMAT0000086	NM_080862	SPSB4	splA/ryanodine receptor domain and SOCS box containing 4	0	0	0	0	0	0	1	1	0	1	1
hsa-miR-29a	MIMAT0000086	NM_001039690	CTF8	chromosome transmission fidelity factor 8 homolog (S. cerevisiae)	0	0	1	0	0	0	0	1	0	1	1
hsa-miR-29a	MIMAT0000086	NM_133265	AMOT	angiomotin	0	0	0	0	0	0	1	1	0	1	1
hsa-miR-29a	MIMAT0000086	NM_080836	STK35	serine/threonine kinase 35	0	0	1	0	0	0	1	1	0	1	0
hsa-miR-29a	MIMAT0000086	NM_138971	BACE1	beta-site APP-cleaving enzyme 1	0	0	1	0	0	0	1	1	0	1	0
hsa-miR-29a	MIMAT0000086	NM_138714	NFAT5	nuclear factor of activated T-cells 5, tonicity-responsive	0	0	1	0	0	0	1	1	0	1	0
hsa-miR-29a	MIMAT0000086	NM_001040429	PCDH17	protocadherin 17	0	0	1	0	0	0	0	1	0	1	1
hsa-miR-29a	MIMAT0000086	NM_030820	COL21A1	collagen, type XXI, alpha 1	0	0	0	1	0	0	1	1	0	1	0
hsa-miR-29a	MIMAT0000086	NM_001199	BMP1	bone morphogenetic protein 1	0	0	1	0	0	0	1	1	0	1	0
hsa-miR-29a	MIMAT0000086	NM_032038	SPNS1	spinster homolog 1 (Drosophila)	0	0	0	0	0	0	1	1	0	1	1
hsa-miR-29a	MIMAT0000086	NM_032132	HORMAD1	HORMA domain containing 1	0	0	1	1	0	0	0	1	0	1	0
hsa-miR-29a	MIMAT0000086	NM_032139	ANKRD27	ankyrin repeat domain 27 (VPS9 domain)	0	0	0	0	0	0	1	1	0	1	1
hsa-miR-29a	MIMAT0000086	NM_032211	LOXL4	lysyl oxidase-like 4	0	0	0	0	0	0	1	1	0	1	1
hsa-miR-29a	MIMAT0000086	NM_001149	ANK3	ankyrin 3, node of Ranvier (ankyrin G)	0	0	0	0	0	0	1	1	0	1	1
hsa-miR-29a	MIMAT0000086	NM_001095	ACCN2	amiloride-sensitive cation channel 2, neuronal	0	0	0	0	0	0	1	1	0	1	1
hsa-miR-29a	MIMAT0000086	NM_032301	FBXW9	F-box and WD repeat domain containing 9	0	0	0	0	0	0	1	1	0	1	1
hsa-miR-29a	MIMAT0000086	NM_032353	VPS25	vacuolar protein sorting 25 homolog (S. cerevisiae)	0	0	0	0	0	0	1	1	0	1	1
hsa-miR-29a	MIMAT0000086	NM_001042539	MAZ	MYC-associated zinc finger protein (purine-binding transcription factor)	0	0	1	0	0	0	0	1	0	1	1
hsa-miR-29a	MIMAT0000086	NM_032410	HOOK3	hook homolog 3 (Drosophila)	0	0	0	0	0	0	1	1	0	1	1
hsa-miR-29a	MIMAT0000086	NM_032467	ASPH	aspartate beta-hydroxylase	0	0	1	0	0	0	1	1	0	1	0
hsa-miR-29a	MIMAT0000086	NM_001219	CALU	calumenin	0	0	1	0	0	0	0	1	0	1	1
hsa-miR-29a	MIMAT0000086	NM_031849	PCDHA6	protocadherin alpha 6	0	0	0	1	0	0	1	1	0	1	0
hsa-miR-29a	MIMAT0000086	NM_001331	CTNND1	catenin (cadherin-associated protein), delta 1	0	0	1	0	0	0	1	1	0	1	0
hsa-miR-29a	MIMAT0000086	NM_030914	URM1	ubiquitin related modifier 1 homolog (S. cerevisiae)	0	0	0	0	0	0	1	1	0	1	1
hsa-miR-29a	MIMAT0000086	NM_030927	TSPAN14	tetraspanin 14	0	0	0	0	0	0	1	1	0	1	1
hsa-miR-29a	MIMAT0000086	NM_030937	CCNL2	cyclin L2	0	0	1	0	0	0	0	1	0	1	1
hsa-miR-29a	MIMAT0000086	NM_030957	ADAMTS10	ADAM metallopeptidase with thrombospondin type 1 motif, 10	0	0	1	0	0	0	0	1	0	1	1
hsa-miR-29a	MIMAT0000086	NM_030962	SBF2	SET binding factor 2	0	0	0	0	0	0	1	1	0	1	1
hsa-miR-29a	MIMAT0000086	NM_030964	SPRY4	sprouty homolog 4 (Drosophila)	0	0	0	0	0	0	1	1	0	1	1
hsa-miR-29a	MIMAT0000086	NM_030980	ISG20L2	interferon stimulated exonuclease gene 20kDa-like 2	0	0	1	1	0	0	0	1	0	1	0
hsa-miR-29a	MIMAT0000086	NM_001386	DPYSL2	dihydropyrimidinase-like 2	0	0	1	0	0	0	0	1	0	1	1
hsa-miR-29a	MIMAT0000086	NM_001364	DLG2	discs, large homolog 2, chapsyn-110 (Drosophila)	0	0	1	0	0	0	0	1	0	1	1
hsa-miR-29a	MIMAT0000086	NM_001356	DDX3X	DEAD (Asp-Glu-Ala-Asp) box polypeptide 3, X-linked	0	0	1	0	0	0	0	1	0	1	1
hsa-miR-29a	MIMAT0000086	NM_001351	DAZL	deleted in azoospermia-like	0	0	1	1	0	0	0	1	0	1	0
hsa-miR-29a	MIMAT0000086	NM_031445	AMMECR1L	AMME chromosomal region gene 1-like	0	0	1	0	0	0	0	1	0	1	1
hsa-miR-29a	MIMAT0000086	NM_001082969	C11orf57	chromosome 11 open reading frame 57	0	0	1	0	0	0	0	1	0	1	1
hsa-miR-29a	MIMAT0000086	NM_032536	NTNG2	netrin G2	0	0	0	0	0	0	1	1	0	1	1
hsa-miR-29a	MIMAT0000086	NM_033381	COL4A5	collagen, type IV, alpha 5 (Alport syndrome)	0	0	0	1	0	0	1	1	0	1	0
hsa-miR-29a	MIMAT0000086	NM_033449	FCHSD1	FCH and double SH3 domains 1	0	0	0	0	0	0	1	1	0	1	1
hsa-miR-29a	MIMAT0000086	NM_001042603	JARID1A	jumonji, AT rich interactive domain 1A	0	0	1	0	0	0	0	1	0	1	1
hsa-miR-29a	MIMAT0000086	NM_033656	BRWD1	bromodomain and WD repeat domain containing 1	0	0	1	0	0	0	0	1	0	1	1
hsa-miR-29a	MIMAT0000086	NM_052818	N4BP2L1	NEDD4 binding protein 2-like 1	0	0	0	0	0	0	1	1	0	1	1
hsa-miR-29a	MIMAT0000086	NM_052840	BRUNOL6	bruno-like 6, RNA binding protein (Drosophila)	0	0	1	0	0	0	0	1	0	1	1
hsa-miR-29a	MIMAT0000086	NM_052869	TTYH2	tweety homolog 2 (Drosophila)	0	0	1	0	0	0	1	1	0	1	0
hsa-miR-29a	MIMAT0000086	NM_001042413	GLIS3	GLIS family zinc finger 3	0	0	1	0	0	0	0	1	0	1	1
hsa-miR-29a	MIMAT0000086	NM_053279	FAM167A	family with sequence similarity 167, member A	0	0	0	0	0	0	1	1	0	1	1
hsa-miR-29a	MIMAT0000086	NM_001040876	ABCE1	ATP-binding cassette, sub-family E (OABP), member 1	0	0	0	1	0	0	0	1	0	1	1
hsa-miR-29a	MIMAT0000086	NM_001040709	SYPL2	synaptophysin-like 2	0	0	1	0	0	0	0	1	0	1	1
hsa-miR-29a	MIMAT0000086	NM_001040662	C14orf138	chromosome 14 open reading frame 138	0	0	1	0	0	0	0	1	0	1	1
hsa-miR-29a	MIMAT0000086	NM_001042750	STAG2	stromal antigen 2	0	0	1	1	0	0	0	1	0	1	0
hsa-miR-29a	MIMAT0000086	NM_001042751	STAG2	stromal antigen 2	0	0	1	1	0	0	0	1	0	1	0
hsa-miR-29a	MIMAT0000086	NM_001043318	C14orf43	chromosome 14 open reading frame 43	0	0	1	0	0	0	0	1	0	1	1
hsa-miR-29a	MIMAT0000086	NM_001081755	ELN	elastin (supravalvular aortic stenosis, Williams-Beuren syndrome)	0	0	1	1	0	0	0	1	0	1	0
hsa-miR-29a	MIMAT0000086	NM_001081754	ELN	elastin (supravalvular aortic stenosis, Williams-Beuren syndrome)	0	0	1	1	0	0	0	1	0	1	0
hsa-miR-29a	MIMAT0000086	NM_001080517	SETD5	SET domain containing 5	0	0	1	0	0	0	0	1	0	1	1
hsa-miR-29a	MIMAT0000086	NM_001080424	JMJD3	jumonji domain containing 3, histone lysine demethylase	0	0	1	0	0	0	0	1	0	1	1
hsa-miR-29a	MIMAT0000086	NM_032727	INA	internexin neuronal intermediate filament protein, alpha	0	0	0	0	0	0	1	1	0	1	1
hsa-miR-29a	MIMAT0000086	NM_001077261	NCOR2	nuclear receptor co-repressor 2	0	0	1	0	0	0	0	1	0	1	1
hsa-miR-29a	MIMAT0000086	NM_032825	ZNF382	zinc finger protein 382	0	0	1	1	0	0	0	1	0	1	0
hsa-miR-29a	MIMAT0000086	NM_001077198	ATG9A	ATG9 autophagy related 9 homolog A (S. cerevisiae)	0	0	1	0	0	0	0	1	0	1	1
hsa-miR-29a	MIMAT0000086	NM_032869	NUDCD1	NudC domain containing 1	0	0	1	1	0	0	0	1	0	1	0
hsa-miR-29a	MIMAT0000086	NM_033016	PDGFB	platelet-derived growth factor beta polypeptide (simian sarcoma viral (v-sis) oncogene homolog)	0	0	1	0	0	0	1	1	0	1	0
hsa-miR-29a	MIMAT0000086	NM_001076683	UBTF	upstream binding transcription factor, RNA polymerase I	0	0	1	0	0	0	0	1	0	1	1
hsa-miR-29a	MIMAT0000086	NM_033132	ZIC5	Zic family member 5 (odd-paired homolog, Drosophila)	0	0	1	0	0	0	0	1	0	1	1
hsa-miR-29a	MIMAT0000086	NM_057166	COL6A3	collagen, type VI, alpha 3	0	0	0	1	0	0	1	1	0	1	0
hsa-miR-29a	MIMAT0000086	NM_001030007	AP1G1	adaptor-related protein complex 1, gamma 1 subunit	0	0	0	1	0	0	0	1	0	1	1
hsa-miR-29a	MIMAT0000086	NM_177438	DICER1	dicer 1, ribonuclease type III	0	0	1	0	0	0	1	1	0	1	0
hsa-miR-29a	MIMAT0000086	NM_182526	C14orf83	chromosome 14 open reading frame 83	0	0	1	0	0	0	0	1	0	1	1
hsa-miR-29a	MIMAT0000086	NM_182557	BCL9L	B-cell CLL/lymphoma 9-like	0	0	1	0	0	0	0	1	0	1	1
hsa-miR-29a	MIMAT0000086	NM_182580	CYB561D1	cytochrome b-561 domain containing 1	0	0	1	0	0	0	1	1	0	1	0
hsa-miR-29a	MIMAT0000086	NM_000872	HTR7	5-hydroxytryptamine (serotonin) receptor 7 (adenylate cyclase-coupled)	0	0	1	0	0	0	1	1	0	1	0
hsa-miR-29a	MIMAT0000086	NM_182764	ELMO2	engulfment and cell motility 2	0	0	1	0	0	0	1	1	0	1	0
hsa-miR-29a	MIMAT0000086	NM_182898	CREB5	cAMP responsive element binding protein 5	0	0	1	0	0	0	1	1	0	1	0
hsa-miR-29a	MIMAT0000086	NM_000841	GRM4	glutamate receptor, metabotropic 4	0	0	0	0	0	0	1	1	0	1	1
hsa-miR-29a	MIMAT0000086	NM_182961	SYNE1	spectrin repeat containing, nuclear envelope 1	0	0	1	0	0	0	1	1	0	1	0
hsa-miR-29a	MIMAT0000086	NM_182964	NAV2	neuron navigator 2	0	0	0	1	0	0	1	1	0	1	0
hsa-miR-29a	MIMAT0000086	NM_183243	IMPDH1	IMP (inosine monophosphate) dehydrogenase 1	0	0	1	0	0	0	1	1	0	1	0
hsa-miR-29a	MIMAT0000086	NM_000794	DRD1	dopamine receptor D1	0	0	0	0	0	0	1	1	0	1	1
hsa-miR-29a	MIMAT0000086	NM_183387	EML5	echinoderm microtubule associated protein like 5	0	0	0	0	0	0	1	1	0	1	1
hsa-miR-29a	MIMAT0000086	NM_183419	RNF19A	ring finger protein 19A	0	0	0	1	0	0	1	1	0	1	0
hsa-miR-29a	MIMAT0000086	NM_181705	LYRM7	Lyrm7 homolog (mouse)	0	0	1	1	0	0	0	1	0	1	0
hsa-miR-29a	MIMAT0000086	NM_181659	NCOA3	nuclear receptor coactivator 3	0	0	1	0	0	0	1	1	0	1	0
hsa-miR-29a	MIMAT0000086	NM_181504	PIK3R1	phosphoinositide-3-kinase, regulatory subunit 1 (alpha)	0	0	1	0	0	0	0	1	0	1	1
hsa-miR-29a	MIMAT0000086	NM_177524	MEST	mesoderm specific transcript homolog (mouse)	0	0	1	1	0	0	0	1	0	1	0
hsa-miR-29a	MIMAT0000086	NM_001001396	ATP2B4	ATPase, Ca++ transporting, plasma membrane 4	0	0	1	0	0	0	0	1	0	1	1
hsa-miR-29a	MIMAT0000086	NM_178031	TMEM132A	transmembrane protein 132A	0	0	1	0	0	0	1	1	0	1	0
hsa-miR-29a	MIMAT0000086	NM_001001349	NKIRAS2	NFKB inhibitor interacting Ras-like 2	0	0	0	0	0	0	1	1	0	1	1
hsa-miR-29a	MIMAT0000086	NM_001001323	ATP2B1	ATPase, Ca++ transporting, plasma membrane 1	0	0	1	0	0	0	1	1	0	1	0
hsa-miR-29a	MIMAT0000086	NM_000965	RARB	retinoic acid receptor, beta	0	0	0	0	0	0	1	1	0	1	1
hsa-miR-29a	MIMAT0000086	NM_178153	DCX	doublecortex; lissencephaly, X-linked (doublecortin)	0	0	0	1	0	0	1	1	0	1	0
hsa-miR-29a	MIMAT0000086	NM_178426	ARNT	aryl hydrocarbon receptor nuclear translocator	0	0	1	0	0	0	1	1	0	1	0
hsa-miR-29a	MIMAT0000086	NM_178427	ARNT	aryl hydrocarbon receptor nuclear translocator	0	0	1	0	0	0	1	1	0	1	0
hsa-miR-29a	MIMAT0000086	NM_152988	SPPL2B	signal peptide peptidase-like 2B	0	0	1	1	0	0	0	1	0	1	0
hsa-miR-29a	MIMAT0000086	NM_178585	WDFY3	WD repeat and FYVE domain containing 3	0	0	1	0	0	0	1	1	0	1	0
hsa-miR-29a	MIMAT0000086	NM_000883	IMPDH1	IMP (inosine monophosphate) dehydrogenase 1	0	0	0	0	0	0	1	1	0	1	1
hsa-miR-29a	MIMAT0000086	NM_181358	HIPK1	homeodomain interacting protein kinase 1	0	0	1	0	0	0	1	1	0	1	0
hsa-miR-29a	MIMAT0000086	NM_194278	C14orf43	chromosome 14 open reading frame 43	0	0	1	0	0	0	1	1	0	1	0
hsa-miR-29a	MIMAT0000086	NM_000619	IFNG	interferon, gamma	0	0	0	0	0	0	1	1	0	1	1
hsa-miR-29a	MIMAT0000086	NM_198966	PTHLH	parathyroid hormone-like hormone	0	0	1	0	0	0	1	1	0	1	0
hsa-miR-29a	MIMAT0000086	NM_000232	SGCB	sarcoglycan, beta (43kDa dystrophin-associated glycoprotein)	0	0	1	1	0	0	0	1	0	1	0
hsa-miR-29a	MIMAT0000086	NM_199436	SPAST	spastin	0	0	1	0	0	0	1	1	0	1	0
hsa-miR-29a	MIMAT0000086	NM_199478	PLP1	proteolipid protein 1 (Pelizaeus-Merzbacher disease, spastic paraplegia 2, uncomplicated)	0	0	1	0	0	0	1	1	0	1	0
hsa-miR-29a	MIMAT0000086	NM_201432	GAS7	growth arrest-specific 7	0	0	1	0	0	0	1	1	0	1	0
hsa-miR-29a	MIMAT0000086	NM_201433	GAS7	growth arrest-specific 7	0	0	1	0	0	0	1	1	0	1	0
hsa-miR-29a	MIMAT0000086	NM_203394	E2F7	E2F transcription factor 7	0	0	0	0	0	0	1	1	0	1	1
hsa-miR-29a	MIMAT0000086	NM_000210	ITGA6	integrin, alpha 6	0	0	0	0	0	0	1	1	0	1	1
hsa-miR-29a	MIMAT0000086	NM_203459	CAMSAP1L1	calmodulin regulated spectrin-associated protein 1-like 1	0	0	1	1	0	0	0	1	0	1	0
hsa-miR-29a	MIMAT0000086	NM_206855	QKI	quaking homolog, KH domain RNA binding (mouse)	0	0	1	0	0	0	1	1	0	1	0
hsa-miR-29a	MIMAT0000086	NM_207123	GAB1	GRB2-associated binding protein 1	0	0	0	1	0	0	1	1	0	1	0
hsa-miR-29a	MIMAT0000086	NM_207514	DEF8	differentially expressed in FDCP 8 homolog (mouse)	0	0	1	0	0	0	0	1	0	1	1
hsa-miR-29a	MIMAT0000086	NM_207577	MAP6	microtubule-associated protein 6	0	0	1	0	0	0	0	1	0	1	1
hsa-miR-29a	MIMAT0000086	NM_198965	PTHLH	parathyroid hormone-like hormone	0	0	1	0	0	0	1	1	0	1	0
hsa-miR-29a	MIMAT0000086	NM_198867	ALKBH6	alkB, alkylation repair homolog 6 (E. coli)	0	0	0	0	0	0	1	1	0	1	1
hsa-miR-29a	MIMAT0000086	NM_000426	LAMA2	laminin, alpha 2 (merosin, congenital muscular dystrophy)	0	0	1	1	0	0	0	1	0	1	0
hsa-miR-29a	MIMAT0000086	NM_000618	IGF1	insulin-like growth factor 1 (somatomedin C)	0	0	0	1	0	0	0	1	0	1	1
hsa-miR-29a	MIMAT0000086	NM_194314	ZBTB41	zinc finger and BTB domain containing 41	0	0	1	0	0	0	0	1	0	1	1
hsa-miR-29a	MIMAT0000086	NM_000538	RFXAP	regulatory factor X-associated protein	0	0	1	1	0	0	0	1	0	1	0
hsa-miR-29a	MIMAT0000086	NM_197947	CLEC7A	C-type lectin domain family 7, member A	0	0	1	1	0	0	0	1	0	1	0
hsa-miR-29a	MIMAT0000086	NM_197950	CLEC7A	C-type lectin domain family 7, member A	0	0	1	1	0	0	0	1	0	1	0
hsa-miR-29a	MIMAT0000086	NM_198057	TSC22D3	TSC22 domain family, member 3	0	0	1	0	0	0	1	1	0	1	0
hsa-miR-29a	MIMAT0000086	NM_198267	ING3	inhibitor of growth family, member 3	0	0	1	1	0	0	0	1	0	1	0
hsa-miR-29a	MIMAT0000086	NM_198268	HIPK1	homeodomain interacting protein kinase 1	0	0	1	0	0	0	1	1	0	1	0
hsa-miR-29a	MIMAT0000086	NM_198269	HIPK1	homeodomain interacting protein kinase 1	0	0	1	0	0	0	1	1	0	1	0
hsa-miR-29a	MIMAT0000086	NM_000508	FGA	fibrinogen alpha chain	0	0	0	0	0	0	1	1	0	1	1
hsa-miR-29a	MIMAT0000086	NM_000501	ELN	elastin (supravalvular aortic stenosis, Williams-Beuren syndrome)	0	0	0	1	0	0	0	1	0	1	1
hsa-miR-29a	MIMAT0000086	NM_000429	MAT1A	methionine adenosyltransferase I, alpha	0	0	0	0	0	0	1	1	0	1	1
hsa-miR-29a	MIMAT0000086	NM_198582	KLHL30	kelch-like 30 (Drosophila)	0	0	1	0	0	0	1	1	0	1	0
hsa-miR-29a	MIMAT0000086	NM_000052	ATP7A	ATPase, Cu++ transporting, alpha polypeptide (Menkes syndrome)	0	0	1	0	0	0	0	1	0	1	1
hsa-miR-29a	MIMAT0000086	NM_175850	DNMT3B	DNA (cytosine-5-)-methyltransferase 3 beta	0	0	0	1	0	0	1	1	0	1	0
hsa-miR-29a	MIMAT0000086	NM_145174	DNAJB7	DnaJ (Hsp40) homolog, subfamily B, member 7	0	0	1	1	0	0	0	1	0	1	0
hsa-miR-29a	MIMAT0000086	NM_001017408	GOPC	golgi associated PDZ and coiled-coil motif containing	0	0	1	0	0	0	0	1	0	1	1
hsa-miR-29a	MIMAT0000086	NM_001015881	TSC22D3	TSC22 domain family, member 3	0	0	1	0	0	0	0	1	0	1	1
hsa-miR-29a	MIMAT0000086	NM_001015508	PURG	purine-rich element binding protein G	0	0	1	1	0	0	0	1	0	1	0
hsa-miR-29a	MIMAT0000086	NM_001014797	KCNMA1	potassium large conductance calcium-activated channel, subfamily M, alpha member 1	0	0	1	0	0	0	0	1	0	1	1
hsa-miR-29a	MIMAT0000086	NM_152667	NANP	N-acetylneuraminic acid phosphatase	0	0	0	0	0	0	1	1	0	1	1
hsa-miR-29a	MIMAT0000086	NM_001013624	ZNF385C	zinc finger protein 385C	0	0	1	0	0	0	0	1	0	1	1
hsa-miR-29a	MIMAT0000086	NM_001012329	CTNNBIP1	catenin, beta interacting protein 1	0	0	1	0	0	0	0	1	0	1	1
hsa-miR-29a	MIMAT0000086	NM_001011666	CREB5	cAMP responsive element binding protein 5	0	0	1	0	0	0	0	1	0	1	1
hsa-miR-29a	MIMAT0000086	NM_152794	HIF3A	hypoxia inducible factor 3, alpha subunit	0	0	1	1	0	0	0	1	0	1	0
hsa-miR-29a	MIMAT0000086	NM_152795	HIF3A	hypoxia inducible factor 3, alpha subunit	0	0	1	1	0	0	0	1	0	1	0
hsa-miR-29a	MIMAT0000086	NM_001009993	FAM168B	family with sequence similarity 168, member B	0	0	1	0	0	0	0	1	0	1	1
hsa-miR-29a	MIMAT0000086	NM_152879	DGKD	diacylglycerol kinase, delta 130kDa	0	0	1	0	0	0	1	1	0	1	0
hsa-miR-29a	MIMAT0000086	NM_001009182	SIP1	survival of motor neuron protein interacting protein 1	0	0	1	1	0	0	0	1	0	1	0
hsa-miR-29a	MIMAT0000086	NM_152517	TTC30B	tetratricopeptide repeat domain 30B	0	0	1	1	0	0	0	1	0	1	0
hsa-miR-29a	MIMAT0000086	NM_001018058	TFEC	transcription factor EC	0	0	1	1	0	0	0	1	0	1	0
hsa-miR-29a	MIMAT0000086	NM_152470	RNF165	ring finger protein 165	0	0	1	0	0	0	0	1	0	1	1
hsa-miR-29a	MIMAT0000086	NM_145257	C1orf96	chromosome 1 open reading frame 96	0	0	1	1	0	0	0	1	0	1	0
hsa-miR-29a	MIMAT0000086	NM_145307	RTKN2	rhotekin 2	0	0	1	1	0	0	0	1	0	1	0
hsa-miR-29a	MIMAT0000086	NM_001025370	VEGFA	vascular endothelial growth factor A	0	0	1	1	0	0	0	1	0	1	0
hsa-miR-29a	MIMAT0000086	NM_145913	SLC5A8	solute carrier family 5 (iodide transporter), member 8	0	0	1	1	0	0	0	1	0	1	0
hsa-miR-29a	MIMAT0000086	NM_152277	UBTD2	ubiquitin domain containing 2	0	0	1	0	0	0	0	1	0	1	1
hsa-miR-29a	MIMAT0000086	NM_152282	ACPL2	acid phosphatase-like 2	0	0	1	1	0	0	0	1	0	1	0
hsa-miR-29a	MIMAT0000086	NM_152298	NASP	nuclear autoantigenic sperm protein (histone-binding)	0	0	0	1	0	0	1	1	0	1	0
hsa-miR-29a	MIMAT0000086	NM_001025369	VEGFA	vascular endothelial growth factor A	0	0	1	1	0	0	0	1	0	1	0
hsa-miR-29a	MIMAT0000086	NM_001025300	RAB12	RAB12, member RAS oncogene family	0	0	1	0	0	0	0	1	0	1	1
hsa-miR-29a	MIMAT0000086	NM_152346	SLC43A2	solute carrier family 43, member 2	0	0	0	0	0	0	1	1	0	1	1
hsa-miR-29a	MIMAT0000086	NM_001024808	BCL7A	B-cell CLL/lymphoma 7A	0	0	1	0	0	0	0	1	0	1	1
hsa-miR-29a	MIMAT0000086	NM_152409	C5orf24	chromosome 5 open reading frame 24	0	0	0	0	0	0	1	1	0	1	1
hsa-miR-29a	MIMAT0000086	NM_001024736	CD276	CD276 molecule	0	0	1	0	0	0	0	1	0	1	1
hsa-miR-29a	MIMAT0000086	NM_001008801	ZNF468	zinc finger protein 468	0	0	1	1	0	0	0	1	0	1	0
hsa-miR-29a	MIMAT0000086	NM_152914	MGC33894	transcript expressed during hematopoiesis 2	0	0	1	0	0	0	0	1	0	1	1
hsa-miR-29a	MIMAT0000086	NM_172173	CAMK2G	calcium/calmodulin-dependent protein kinase (CaM kinase) II gamma	0	0	0	1	0	0	1	1	0	1	0
hsa-miR-29a	MIMAT0000086	NM_001003943	BMF	Bcl2 modifying factor	0	0	0	1	0	0	1	1	0	1	0
hsa-miR-29a	MIMAT0000086	NM_173191	KCNIP2	Kv channel interacting protein 2	0	0	1	0	0	0	1	1	0	1	0
hsa-miR-29a	MIMAT0000086	NM_173192	KCNIP2	Kv channel interacting protein 2	0	0	1	0	0	0	1	1	0	1	0
hsa-miR-29a	MIMAT0000086	NM_173193	KCNIP2	Kv channel interacting protein 2	0	0	1	0	0	0	1	1	0	1	0
hsa-miR-29a	MIMAT0000086	NM_173214	NFAT5	nuclear factor of activated T-cells 5, tonicity-responsive	0	0	1	0	0	0	1	1	0	1	0
hsa-miR-29a	MIMAT0000086	NM_001002860	BTBD7	BTB (POZ) domain containing 7	0	0	1	0	0	0	0	1	0	1	1
hsa-miR-29a	MIMAT0000086	NM_173562	KCTD20	potassium channel tetramerisation domain containing 20	0	0	1	1	0	0	0	1	0	1	0
hsa-miR-29a	MIMAT0000086	NM_173602	DIP2B	DIP2 disco-interacting protein 2 homolog B (Drosophila)	0	0	1	0	0	0	0	1	0	1	1
hsa-miR-29a	MIMAT0000086	NM_001002296	GOLGA7	golgi autoantigen, golgin subfamily a, 7	0	0	0	0	0	0	1	1	0	1	1
hsa-miR-29a	MIMAT0000086	NM_001002027	ATP5G1	ATP synthase, H+ transporting, mitochondrial F0 complex, subunit C1 (subunit 9)	0	0	0	0	0	0	1	1	0	1	1
hsa-miR-29a	MIMAT0000086	NM_175733	SYT9	synaptotagmin IX	0	0	0	0	0	0	1	1	0	1	1
hsa-miR-29a	MIMAT0000086	NM_175848	DNMT3B	DNA (cytosine-5-)-methyltransferase 3 beta	0	0	0	1	0	0	1	1	0	1	0
hsa-miR-29a	MIMAT0000086	NM_001004439	ITGA11	integrin, alpha 11	0	0	0	0	0	0	1	1	0	1	1
hsa-miR-29a	MIMAT0000086	NM_172170	CAMK2G	calcium/calmodulin-dependent protein kinase (CaM kinase) II gamma	0	0	0	1	0	0	1	1	0	1	0
hsa-miR-29a	MIMAT0000086	NM_172169	CAMK2G	calcium/calmodulin-dependent protein kinase (CaM kinase) II gamma	0	0	0	1	0	0	1	1	0	1	0
hsa-miR-29a	MIMAT0000086	NM_001080415	SR140	U2-associated SR140 protein	0	0	1	0	0	0	0	1	0	1	1
hsa-miR-29a	MIMAT0000086	NM_153219	ZNF524	zinc finger protein 524	0	0	0	0	0	0	1	1	0	1	1
hsa-miR-29a	MIMAT0000086	NM_153221	CILP2	cartilage intermediate layer protein 2	0	0	1	0	0	0	0	1	0	1	1
hsa-miR-29a	MIMAT0000086	NM_153321	PMP22	peripheral myelin protein 22	0	0	0	1	0	0	1	1	0	1	0
hsa-miR-29a	MIMAT0000086	NM_001008401	ZNF761	zinc finger protein 761	0	0	1	1	0	0	0	1	0	1	0
hsa-miR-29a	MIMAT0000086	NM_001007094	ZNF37A	zinc finger protein 37A	0	0	1	1	0	0	0	1	0	1	0
hsa-miR-29a	MIMAT0000086	NM_001006623	WDR33	WD repeat domain 33	0	0	1	1	0	0	0	1	0	1	0
hsa-miR-29a	MIMAT0000086	NM_001005502	CPM	carboxypeptidase M	0	0	1	1	0	0	0	1	0	1	0
hsa-miR-29a	MIMAT0000086	NM_153715	HOXA10	homeobox A10	0	0	1	0	0	0	1	1	0	1	0
hsa-miR-29a	MIMAT0000086	NM_153756	FNDC5	fibronectin type III domain containing 5	0	0	1	1	0	0	0	1	0	1	0
hsa-miR-29a	MIMAT0000086	NM_153759	DNMT3A	DNA (cytosine-5-)-methyltransferase 3 alpha	0	0	0	1	0	0	1	1	0	1	0
hsa-miR-29a	MIMAT0000086	NM_170719	C13orf23	chromosome 13 open reading frame 23	0	0	1	0	0	0	1	1	0	1	0
hsa-miR-29a	MIMAT0000086	NM_001005404	YPEL2	yippee-like 2 (Drosophila)	0	0	0	1	0	0	0	1	0	1	1
hsa-miR-29a	MIMAT0000086	NM_001001436	C16orf87	chromosome 16 open reading frame 87	0	0	0	0	0	0	1	1	0	1	1
hsa-miR-29a	MIMAT0000086	NM_014417	BBC3	BCL2 binding component 3	0	0	1	0	0	0	1	1	0	1	0
hsa-miR-29a	MIMAT0000086	NM_014720	SLK	STE20-like kinase (yeast)	0	0	0	0	0	0	1	1	0	1	1
hsa-miR-29a	MIMAT0000086	NM_014725	STARD8	StAR-related lipid transfer (START) domain containing 8	0	0	0	0	0	0	1	1	0	1	1
hsa-miR-29a	MIMAT0000086	NM_014765	TOMM20	translocase of outer mitochondrial membrane 20 homolog (yeast)	0	0	1	1	0	0	0	1	0	1	0
hsa-miR-29a	MIMAT0000086	NM_014829	DDX46	DEAD (Asp-Glu-Ala-Asp) box polypeptide 46	0	0	1	0	0	0	0	1	0	1	1
hsa-miR-29a	MIMAT0000086	NM_004718	COX7A2L	cytochrome c oxidase subunit VIIa polypeptide 2 like	0	0	1	1	0	0	0	1	0	1	0
hsa-miR-29a	MIMAT0000086	NM_004647	DPF1	D4, zinc and double PHD fingers family 1	0	0	0	0	0	0	1	1	0	1	1
hsa-miR-29a	MIMAT0000086	NM_014888	FAM3C	family with sequence similarity 3, member C	0	0	1	1	0	0	0	1	0	1	0
hsa-miR-29a	MIMAT0000086	NM_004595	SMS	spermine synthase	0	0	0	1	0	0	0	1	0	1	1
hsa-miR-29a	MIMAT0000086	NM_004554	NFATC4	nuclear factor of activated T-cells, cytoplasmic, calcineurin-dependent 4	0	0	0	0	0	0	1	1	0	1	1
hsa-miR-29a	MIMAT0000086	NM_014991	WDFY3	WD repeat and FYVE domain containing 3	0	0	0	0	0	0	1	1	0	1	1
hsa-miR-29a	MIMAT0000086	NM_014994	MAPKBP1	mitogen-activated protein kinase binding protein 1	0	0	1	0	0	0	0	1	0	1	1
hsa-miR-29a	MIMAT0000086	NM_015001	SPEN	spen homolog, transcriptional regulator (Drosophila)	0	0	0	0	0	0	1	1	0	1	1
hsa-miR-29a	MIMAT0000086	NM_015042	ZNF609	zinc finger protein 609	0	0	1	0	0	0	0	1	0	1	1
hsa-miR-29a	MIMAT0000086	NM_014690	FAM131B	family with sequence similarity 131, member B	0	0	1	0	0	0	1	1	0	1	0
hsa-miR-29a	MIMAT0000086	NM_014655	SLC25A44	solute carrier family 25, member 44	0	0	0	0	0	0	1	1	0	1	1
hsa-miR-29a	MIMAT0000086	NM_014423	AFF4	AF4/FMR2 family, member 4	0	0	1	0	0	0	0	1	0	1	1
hsa-miR-29a	MIMAT0000086	NM_004904	CREB5	cAMP responsive element binding protein 5	0	0	1	0	0	0	1	1	0	1	0
hsa-miR-29a	MIMAT0000086	NM_014489	FRAG1	FGF receptor activating protein 1	0	0	0	1	0	0	1	1	0	1	0
hsa-miR-29a	MIMAT0000086	NM_004859	CLTC	clathrin, heavy chain (Hc)	0	0	1	1	0	0	0	1	0	1	0
hsa-miR-29a	MIMAT0000086	NM_014574	STRN3	striatin, calmodulin binding protein 3	0	0	1	0	0	0	1	1	0	1	0
hsa-miR-29a	MIMAT0000086	NM_014575	SCHIP1	schwannomin interacting protein 1	0	0	0	0	0	0	1	1	0	1	1
hsa-miR-29a	MIMAT0000086	NM_004852	ONECUT2	one cut homeobox 2	0	0	1	0	0	0	0	1	0	1	1
hsa-miR-29a	MIMAT0000086	NM_014601	EHD2	EH-domain containing 2	0	0	0	0	0	0	1	1	0	1	1
hsa-miR-29a	MIMAT0000086	NM_004845	PCYT1B	phosphate cytidylyltransferase 1, choline, beta	0	0	1	0	0	0	0	1	0	1	1
hsa-miR-29a	MIMAT0000086	NM_014618	DBC1	deleted in bladder cancer 1	0	0	0	0	0	0	1	1	0	1	1
hsa-miR-29a	MIMAT0000086	NM_004834	MAP4K4	mitogen-activated protein kinase kinase kinase kinase 4	0	0	1	0	0	0	0	1	0	1	1
hsa-miR-29a	MIMAT0000086	NM_014635	GCC2	GRIP and coiled-coil domain containing 2	0	0	1	0	0	0	0	1	0	1	1
hsa-miR-29a	MIMAT0000086	NM_014653	WSCD2	WSC domain containing 2	0	0	1	0	0	0	0	1	0	1	1
hsa-miR-29a	MIMAT0000086	NM_004418	DUSP2	dual specificity phosphatase 2	0	0	0	0	0	0	1	1	0	1	1
hsa-miR-29a	MIMAT0000086	NM_015115	DCUN1D4	DCN1, defective in cullin neddylation 1, domain containing 4 (S. cerevisiae)	0	0	1	0	0	0	1	1	0	1	0
hsa-miR-29a	MIMAT0000086	NM_015155	LARP5	La ribonucleoprotein domain family, member 5	0	0	0	1	0	0	0	1	0	1	1
hsa-miR-29a	MIMAT0000086	NM_003908	EIF2S2	eukaryotic translation initiation factor 2, subunit 2 beta, 38kDa	0	0	1	0	0	0	0	1	0	1	1
hsa-miR-29a	MIMAT0000086	NM_003887	DDEF2	development and differentiation enhancing factor 2	0	0	1	1	0	0	0	1	0	1	0
hsa-miR-29a	MIMAT0000086	NM_003856	IL1RL1	interleukin 1 receptor-like 1	0	0	1	1	0	0	0	1	0	1	0
hsa-miR-29a	MIMAT0000086	NM_016099	GOLGA7	golgi autoantigen, golgin subfamily a, 7	0	0	1	0	0	0	1	1	0	1	0
hsa-miR-29a	MIMAT0000086	NM_003763	STX16	syntaxin 16	0	0	1	1	0	0	0	1	0	1	0
hsa-miR-29a	MIMAT0000086	NM_016152	RARB	retinoic acid receptor, beta	0	0	1	0	0	0	1	1	0	1	0
hsa-miR-29a	MIMAT0000086	NM_016205	PDGFC	platelet derived growth factor C	0	0	0	0	0	0	1	1	0	1	1
hsa-miR-29a	MIMAT0000086	NM_016252	BIRC6	baculoviral IAP repeat-containing 6 (apollon)	0	0	1	0	0	0	0	1	0	1	1
hsa-miR-29a	MIMAT0000086	NM_016261	TUBD1	tubulin, delta 1	0	0	1	1	0	0	0	1	0	1	0
hsa-miR-29a	MIMAT0000086	NM_003644	GAS7	growth arrest-specific 7	0	0	0	0	0	0	1	1	0	1	1
hsa-miR-29a	MIMAT0000086	NM_003607	CDC42BPA	CDC42 binding protein kinase alpha (DMPK-like)	0	0	1	0	0	0	0	1	0	1	1
hsa-miR-29a	MIMAT0000086	NM_003474	ADAM12	ADAM metallopeptidase domain 12 (meltrin alpha)	0	0	1	0	0	0	0	1	0	1	1
hsa-miR-29a	MIMAT0000086	NM_016831	PER3	period homolog 3 (Drosophila)	0	0	0	0	0	0	1	1	0	1	1
hsa-miR-29a	MIMAT0000086	NM_015995	KLF13	Kruppel-like factor 13	0	0	0	0	0	0	1	1	0	1	1
hsa-miR-29a	MIMAT0000086	NM_003993	CLK2	CDC-like kinase 2	0	0	0	0	0	0	1	1	0	1	1
hsa-miR-29a	MIMAT0000086	NM_015163	TRIM9	tripartite motif-containing 9	0	0	0	0	0	0	1	1	0	1	1
hsa-miR-29a	MIMAT0000086	NM_015206	KIAA1024	KIAA1024	0	0	1	0	0	0	0	1	0	1	1
hsa-miR-29a	MIMAT0000086	NM_015215	CAMTA1	calmodulin binding transcription activator 1	0	0	0	0	0	0	1	1	0	1	1
hsa-miR-29a	MIMAT0000086	NM_015231	NUP160	nucleoporin 160kDa	0	0	1	0	0	0	0	1	0	1	1
hsa-miR-29a	MIMAT0000086	NM_004200	SYT7	synaptotagmin VII	0	0	0	0	0	0	1	1	0	1	1
hsa-miR-29a	MIMAT0000086	NM_015326	SRGAP2	SLIT-ROBO Rho GTPase activating protein 2	0	0	1	0	0	0	0	1	0	1	1
hsa-miR-29a	MIMAT0000086	NM_015396	ARMC8	armadillo repeat containing 8	0	0	1	0	0	0	1	1	0	1	0
hsa-miR-29a	MIMAT0000086	NM_015455	CNOT6	CCR4-NOT transcription complex, subunit 6	0	0	0	0	0	0	1	1	0	1	1
hsa-miR-29a	MIMAT0000086	NM_004155	SERPINB9	serpin peptidase inhibitor, clade B (ovalbumin), member 9	0	0	1	1	0	0	0	1	0	1	0
hsa-miR-29a	MIMAT0000086	NM_004133	HNF4G	hepatocyte nuclear factor 4, gamma	0	0	0	1	0	0	0	1	0	1	1
hsa-miR-29a	MIMAT0000086	NM_015627	LDLRAP1	low density lipoprotein receptor adaptor protein 1	0	0	0	0	0	0	1	1	0	1	1
hsa-miR-29a	MIMAT0000086	NM_015696	GPX7	glutathione peroxidase 7	0	0	0	0	0	0	1	1	0	1	1
hsa-miR-29a	MIMAT0000086	NM_004050	BCL2L2	BCL2-like 2	0	0	0	0	0	0	1	1	0	1	1
hsa-miR-29a	MIMAT0000086	NM_016946	F11R	F11 receptor	0	0	1	0	0	0	0	1	0	1	1
hsa-miR-29a	MIMAT0000086	NM_006258	PRKG1	protein kinase, cGMP-dependent, type I	0	0	0	0	0	0	1	1	0	1	1
hsa-miR-29a	MIMAT0000086	NM_006746	SCML1	sex comb on midleg-like 1 (Drosophila)	0	0	1	1	0	0	0	1	0	1	0
hsa-miR-29a	MIMAT0000086	NM_005911	MAT2A	methionine adenosyltransferase II, alpha	0	0	0	0	0	0	1	1	0	1	1
hsa-miR-29a	MIMAT0000086	NM_005859	PURA	purine-rich element binding protein A	0	0	0	1	0	0	0	1	0	1	1
hsa-miR-29a	MIMAT0000086	NM_006807	CBX1	chromobox homolog 1 (HP1 beta homolog Drosophila )	0	0	0	0	0	0	1	1	0	1	1
hsa-miR-29a	MIMAT0000086	NM_006814	PSMF1	proteasome (prosome, macropain) inhibitor subunit 1 (PI31)	0	0	1	1	0	0	0	1	0	1	0
hsa-miR-29a	MIMAT0000086	NM_005828	WDR68	WD repeat domain 68	0	0	0	0	0	0	1	1	0	1	1
hsa-miR-29a	MIMAT0000086	NM_005689	ABCB6	ATP-binding cassette, sub-family B (MDR/TAP), member 6	0	0	0	0	0	0	1	1	0	1	1
hsa-miR-29a	MIMAT0000086	NM_006838	METAP2	methionyl aminopeptidase 2	0	0	1	1	0	0	0	1	0	1	0
hsa-miR-29a	MIMAT0000086	NM_005596	NFIB	nuclear factor I/B	0	0	1	0	0	0	0	1	0	1	1
hsa-miR-29a	MIMAT0000086	NM_005591	MRE11A	MRE11 meiotic recombination 11 homolog A (S. cerevisiae)	0	0	1	1	0	0	0	1	0	1	0
hsa-miR-29a	MIMAT0000086	NM_006951	TAF5	TAF5 RNA polymerase II, TATA box binding protein (TBP)-associated factor, 100kDa	0	0	0	0	0	0	1	1	0	1	1
hsa-miR-29a	MIMAT0000086	NM_006969	ZNF28	zinc finger protein 28	0	0	1	1	0	0	0	1	0	1	0
hsa-miR-29a	MIMAT0000086	NM_007040	HNRNPUL1	heterogeneous nuclear ribonucleoprotein U-like 1	0	0	0	0	0	0	1	1	0	1	1
hsa-miR-29a	MIMAT0000086	NM_005938	FOXO4	forkhead box O4	0	0	0	0	0	0	1	1	0	1	1
hsa-miR-29a	MIMAT0000086	NM_006729	DIAPH2	diaphanous homolog 2 (Drosophila)	0	0	0	0	0	0	1	1	0	1	1
hsa-miR-29a	MIMAT0000086	NM_006312	NCOR2	nuclear receptor co-repressor 2	0	0	1	0	0	0	1	1	0	1	0
hsa-miR-29a	MIMAT0000086	NM_006336	ZER1	zer-1 homolog (C. elegans)	0	0	0	0	0	0	1	1	0	1	1
hsa-miR-29a	MIMAT0000086	NM_006380	APPBP2	amyloid beta precursor protein (cytoplasmic tail) binding protein 2	0	0	0	0	0	0	1	1	0	1	1
hsa-miR-29a	MIMAT0000086	NM_006470	TRIM16	tripartite motif-containing 16	0	0	1	1	0	0	0	1	0	1	0
hsa-miR-29a	MIMAT0000086	NM_006517	SLC16A2	solute carrier family 16, member 2 (monocarboxylic acid transporter 8)	0	0	0	0	0	0	1	1	0	1	1
hsa-miR-29a	MIMAT0000086	NM_006201	PCTK1	PCTAIRE protein kinase 1	0	0	0	0	0	0	1	1	0	1	1
hsa-miR-29a	MIMAT0000086	NM_006549	CAMKK2	calcium/calmodulin-dependent protein kinase kinase 2, beta	0	0	0	0	0	0	1	1	0	1	1
hsa-miR-29a	MIMAT0000086	NM_006572	GNA13	guanine nucleotide binding protein (G protein), alpha 13	0	0	1	1	0	0	0	1	0	1	0
hsa-miR-29a	MIMAT0000086	NM_006128	BMP1	bone morphogenetic protein 1	0	0	1	0	0	0	1	1	0	1	0
hsa-miR-29a	MIMAT0000086	NM_006089	SCML2	sex comb on midleg-like 2 (Drosophila)	0	0	0	1	0	0	0	1	0	1	1
hsa-miR-29a	MIMAT0000086	NM_006606	RBBP9	retinoblastoma binding protein 9	0	0	1	1	0	0	0	1	0	1	0
hsa-miR-29a	MIMAT0000086	NM_006041	HS3ST3B1	heparan sulfate (glucosamine) 3-O-sulfotransferase 3B1	0	0	0	0	0	0	1	1	0	1	1
hsa-miR-29a	MIMAT0000086	NM_006017	PROM1	prominin 1	0	0	1	1	0	0	0	1	0	1	0
hsa-miR-29a	MIMAT0000086	NM_007200	AKAP13	A kinase (PRKA) anchor protein 13	0	0	1	0	0	0	1	1	0	1	0
hsa-miR-29a	MIMAT0000086	NM_007231	SLC6A14	solute carrier family 6 (amino acid transporter), member 14	0	0	1	1	0	0	0	1	0	1	0
hsa-miR-29a	MIMAT0000086	NM_005437	NCOA4	nuclear receptor coactivator 4	0	0	0	0	0	0	1	1	0	1	1
hsa-miR-29a	MIMAT0000086	NM_013269	CLEC2D	C-type lectin domain family 2, member D	0	0	1	1	0	0	0	1	0	1	0
hsa-miR-29a	MIMAT0000086	NM_013392	NRBP1	nuclear receptor binding protein 1	0	0	1	0	0	0	1	1	0	1	0
hsa-miR-29a	MIMAT0000086	NM_013403	STRN4	striatin, calmodulin binding protein 4	0	0	1	0	0	0	1	1	0	1	0
hsa-miR-29a	MIMAT0000086	NM_005156	ROD1	ROD1 regulator of differentiation 1 (S. pombe)	0	0	1	0	0	0	0	1	0	1	1
hsa-miR-29a	MIMAT0000086	NM_014007	ZBTB43	zinc finger and BTB domain containing 43	0	0	1	1	0	0	0	1	0	1	0
hsa-miR-29a	MIMAT0000086	NM_005066	SFPQ	splicing factor proline/glutamine-rich (polypyrimidine tract binding protein associated)	0	0	0	0	0	0	1	1	0	1	1
hsa-miR-29a	MIMAT0000086	NM_014039	C11orf54	chromosome 11 open reading frame 54	0	0	1	1	0	0	0	1	0	1	0
hsa-miR-29a	MIMAT0000086	NM_014117	C16orf72	chromosome 16 open reading frame 72	0	0	0	0	0	0	1	1	0	1	1
hsa-miR-29a	MIMAT0000086	NM_014272	ADAMTS7	ADAM metallopeptidase with thrombospondin type 1 motif, 7	0	0	0	0	0	0	1	1	0	1	1
hsa-miR-29a	MIMAT0000086	NM_014275	MGAT4B	mannosyl (alpha-1,3-)-glycoprotein beta-1,4-N-acetylglucosaminyltransferase, isozyme B	0	0	1	0	0	0	0	1	0	1	1
hsa-miR-29a	MIMAT0000086	NM_014292	CBX6	chromobox homolog 6	0	0	0	0	0	0	1	1	0	1	1
hsa-miR-29a	MIMAT0000086	NM_004973	JARID2	jumonji, AT rich interactive domain 2	0	0	0	1	0	0	1	1	0	1	0
hsa-miR-29a	MIMAT0000086	NM_004966	HNRNPF	heterogeneous nuclear ribonucleoprotein F	0	0	0	0	0	0	1	1	0	1	1
hsa-miR-29a	MIMAT0000086	NM_005168	RND3	Rho family GTPase 3	0	0	0	0	0	0	1	1	0	1	1
hsa-miR-29a	MIMAT0000086	NM_012464	TLL1	tolloid-like 1	0	0	0	0	0	0	1	1	0	1	1
hsa-miR-29a	MIMAT0000086	NM_007313	ABL1	c-abl oncogene 1, receptor tyrosine kinase	0	0	0	0	0	0	1	1	0	1	1
hsa-miR-29a	MIMAT0000086	NM_005385	NKTR	natural killer-tumor recognition sequence	0	0	0	0	0	0	1	1	0	1	1
hsa-miR-29a	MIMAT0000086	NM_005259	MSTN	myostatin	0	0	0	0	0	0	1	1	0	1	1
hsa-miR-29a	MIMAT0000086	NM_005252	FOS	v-fos FBJ murine osteosarcoma viral oncogene homolog	0	0	0	0	0	0	1	1	0	1	1
hsa-miR-29a	MIMAT0000086	NM_012214	MGAT4A	mannosyl (alpha-1,3-)-glycoprotein beta-1,4-N-acetylglucosaminyltransferase, isozyme A	0	0	1	1	0	0	0	1	0	1	0
hsa-miR-29a	MIMAT0000086	NM_005197	FOXN3	forkhead box N3	0	0	1	0	0	0	1	1	0	1	0
hsa-miR-29a	MIMAT0000086	NM_005189	CBX2	chromobox homolog 2 (Pc class homolog, Drosophila)	0	0	1	0	0	0	0	1	0	1	1
hsa-miR-29a	MIMAT0000086	NM_012259	HEY2	hairy/enhancer-of-split related with YRPW motif 2	0	0	1	1	0	0	0	1	0	1	0
hsa-miR-29a	MIMAT0000086	NM_012286	MORF4L2	mortality factor 4 like 2	0	0	0	1	0	0	0	1	0	1	1
hsa-miR-29a	MIMAT0000086	NM_012293	PXDN	peroxidasin homolog (Drosophila)	0	0	0	1	0	0	0	1	0	1	1
hsa-miR-29a	MIMAT0000086	NM_005181	CA3	carbonic anhydrase III, muscle specific	0	0	0	0	0	0	1	1	0	1	1
hsa-miR-29a	MIMAT0000086	NM_005175	ATP5G1	ATP synthase, H+ transporting, mitochondrial F0 complex, subunit C1 (subunit 9)	0	0	1	0	0	0	1	1	0	1	0
hsa-miR-29a	MIMAT0000086	NM_012432	SETDB1	SET domain, bifurcated 1	0	0	0	0	0	0	1	1	0	1	1
hsa-miR-29a	MIMAT0000086	NM_014405	CACNG4	calcium channel, voltage-dependent, gamma subunit 4	0	0	0	0	0	0	1	1	0	1	1
hsa-miR-29a	MIMAT0000086	NM_020465	NDRG4	NDRG family member 4	0	0	0	0	0	0	1	1	0	1	1
hsa-miR-29a	MIMAT0000086	NM_021133	RNASEL	ribonuclease L (2",5"-oligoisoadenylate synthetase-dependent)	0	0	1	1	0	0	0	1	0	1	0
hsa-miR-29a	MIMAT0000086	NM_001935	DPP4	dipeptidyl-peptidase 4 (CD26, adenosine deaminase complexing protein 2)	0	0	0	0	0	0	1	1	0	1	1
hsa-miR-29a	MIMAT0000086	NM_021168	RAB40C	RAB40C, member RAS oncogene family	0	0	0	0	0	0	1	1	0	1	1
hsa-miR-29a	MIMAT0000086	NM_021202	TP53INP2	tumor protein p53 inducible nuclear protein 2	0	0	0	0	0	0	1	1	0	1	1
hsa-miR-29a	MIMAT0000086	NM_021622	PLEKHA1	pleckstrin homology domain containing, family A (phosphoinositide binding specific) member 1	0	0	1	0	0	0	1	1	0	1	0
hsa-miR-29a	MIMAT0000086	NM_021738	SVIL	supervillin	0	0	1	0	0	0	1	1	0	1	0
hsa-miR-29a	MIMAT0000086	NM_021914	CFL2	cofilin 2 (muscle)	0	0	0	0	0	0	1	1	0	1	1
hsa-miR-29a	MIMAT0000086	NM_021932	RIC8A	resistance to inhibitors of cholinesterase 8 homolog A (C. elegans)	0	0	1	0	0	0	0	1	0	1	1
hsa-miR-29a	MIMAT0000086	NM_021946	BCORL1	BCL6 co-repressor-like 1	0	0	0	0	0	0	1	1	0	1	1
hsa-miR-29a	MIMAT0000086	NM_021960	MCL1	myeloid cell leukemia sequence 1 (BCL2-related)	0	0	1	0	0	0	1	1	0	1	0
hsa-miR-29a	MIMAT0000086	NM_001874	CPM	carboxypeptidase M	0	0	1	1	0	0	0	1	0	1	0
hsa-miR-29a	MIMAT0000086	NM_022062	PKNOX2	PBX/knotted 1 homeobox 2	0	0	0	0	0	0	1	1	0	1	1
hsa-miR-29a	MIMAT0000086	NM_022072	NSUN3	NOL1/NOP2/Sun domain family, member 3	0	0	1	0	0	0	1	1	0	1	0
hsa-miR-29a	MIMAT0000086	NM_001981	EPS15	epidermal growth factor receptor pathway substrate 15	0	0	1	0	0	0	0	1	0	1	1
hsa-miR-29a	MIMAT0000086	NM_021012	KCNJ12	potassium inwardly-rectifying channel, subfamily J, member 12	0	0	1	0	0	0	0	1	0	1	1
hsa-miR-29a	MIMAT0000086	NM_020630	RET	ret proto-oncogene	0	0	1	0	0	0	1	1	0	1	0
hsa-miR-29a	MIMAT0000086	NM_002182	IL1RAP	interleukin 1 receptor accessory protein	0	0	1	0	0	0	0	1	0	1	1
hsa-miR-29a	MIMAT0000086	NM_020750	XPO5	exportin 5	0	0	0	0	0	0	1	1	0	1	1
hsa-miR-29a	MIMAT0000086	NM_020782	KLHDC5	kelch domain containing 5	0	0	1	0	0	0	0	1	0	1	1
hsa-miR-29a	MIMAT0000086	NM_020784	TXNDC16	thioredoxin domain containing 16	0	0	1	1	0	0	0	1	0	1	0
hsa-miR-29a	MIMAT0000086	NM_020803	KLHL8	kelch-like 8 (Drosophila)	0	0	1	1	0	0	0	1	0	1	0
hsa-miR-29a	MIMAT0000086	NM_002021	FMO1	flavin containing monooxygenase 1	0	0	1	1	0	0	0	1	0	1	0
hsa-miR-29a	MIMAT0000086	NM_020851	ISLR2	immunoglobulin superfamily containing leucine-rich repeat 2	0	0	1	0	0	0	1	1	0	1	0
hsa-miR-29a	MIMAT0000086	NM_020903	USP29	ubiquitin specific peptidase 29	0	0	1	1	0	0	0	1	0	1	0
hsa-miR-29a	MIMAT0000086	NM_002014	FKBP4	FK506 binding protein 4, 59kDa	0	0	0	0	0	0	1	1	0	1	1
hsa-miR-29a	MIMAT0000086	NM_001987	ETV6	ets variant gene 6 (TEL oncogene)	0	0	0	0	0	0	1	1	0	1	1
hsa-miR-29a	MIMAT0000086	NM_020987	ANK3	ankyrin 3, node of Ranvier (ankyrin G)	0	0	1	0	0	0	1	1	0	1	0
hsa-miR-29a	MIMAT0000086	NM_020993	BCL7A	B-cell CLL/lymphoma 7A	0	0	1	0	0	0	1	1	0	1	0
hsa-miR-29a	MIMAT0000086	NM_022079	HERC4	hect domain and RLD 4	0	0	1	1	0	0	0	1	0	1	0
hsa-miR-29a	MIMAT0000086	NM_022080	NAPB	N-ethylmaleimide-sensitive factor attachment protein, beta	0	0	1	1	0	0	0	1	0	1	0
hsa-miR-29a	MIMAT0000086	NM_001859	SLC31A1	solute carrier family 31 (copper transporters), member 1	0	0	0	0	0	0	1	1	0	1	1
hsa-miR-29a	MIMAT0000086	NM_024817	THSD4	thrombospondin, type I, domain containing 4	0	0	1	0	0	0	1	1	0	1	0
hsa-miR-29a	MIMAT0000086	NM_024845	FLJ14154	hypothetical protein FLJ14154	0	0	0	0	0	0	1	1	0	1	1
hsa-miR-29a	MIMAT0000086	NM_001650	AQP4	aquaporin 4	0	0	0	0	0	0	1	1	0	1	1
hsa-miR-29a	MIMAT0000086	NM_025083	EDC3	enhancer of mRNA decapping 3 homolog (S. cerevisiae)	0	0	0	0	0	0	1	1	0	1	1
hsa-miR-29a	MIMAT0000086	NM_001626	AKT2	v-akt murine thymoma viral oncogene homolog 2	0	0	1	1	0	0	0	1	0	1	0
hsa-miR-29a	MIMAT0000086	NM_025161	C17orf70	chromosome 17 open reading frame 70	0	0	1	0	0	0	1	1	0	1	0
hsa-miR-29a	MIMAT0000086	NM_025209	EPC1	enhancer of polycomb homolog 1 (Drosophila)	0	0	1	0	0	0	1	1	0	1	0
hsa-miR-29a	MIMAT0000086	NM_025224	ZBTB46	zinc finger and BTB domain containing 46	0	0	0	0	0	0	1	1	0	1	1
hsa-miR-29a	MIMAT0000086	NM_030594	CPEB1	cytoplasmic polyadenylation element binding protein 1	0	0	1	0	0	0	1	1	0	1	0
hsa-miR-29a	MIMAT0000086	NM_001616	ACVR2A	activin A receptor, type IIA	0	0	1	0	0	0	0	1	0	1	1
hsa-miR-29a	MIMAT0000086	NM_001561	TNFRSF9	tumor necrosis factor receptor superfamily, member 9	0	0	1	1	0	0	0	1	0	1	0
hsa-miR-29a	MIMAT0000086	NM_001455	FOXO3	forkhead box O3	0	0	1	0	0	0	0	1	0	1	1
hsa-miR-29a	MIMAT0000086	NM_001426	EN1	engrailed homeobox 1	0	0	0	0	0	0	1	1	0	1	1
hsa-miR-29a	MIMAT0000086	NM_024787	RNF122	ring finger protein 122	0	0	0	0	0	0	1	1	0	1	1
hsa-miR-29a	MIMAT0000086	NM_001668	ARNT	aryl hydrocarbon receptor nuclear translocator	0	0	0	0	0	0	1	1	0	1	1
hsa-miR-29a	MIMAT0000086	NM_022465	IKZF4	IKAROS family zinc finger 4 (Eos)	0	0	0	0	0	0	1	1	0	1	1
hsa-miR-29a	MIMAT0000086	NM_001810	CENPB	centromere protein B, 80kDa	0	0	0	0	0	0	1	1	0	1	1
hsa-miR-29a	MIMAT0000086	NM_001791	CDC42	cell division cycle 42 (GTP binding protein, 25kDa)	0	0	0	1	0	0	1	1	0	1	0
hsa-miR-29a	MIMAT0000086	NM_022776	OSBPL11	oxysterol binding protein-like 11	0	0	1	0	0	0	1	1	0	1	0
hsa-miR-29a	MIMAT0000086	NM_001746	CANX	calnexin	0	0	1	0	0	0	1	1	0	1	0
hsa-miR-29a	MIMAT0000086	NM_001742	CALCR	calcitonin receptor	0	0	0	0	0	0	1	1	0	1	1
hsa-miR-29a	MIMAT0000086	NM_022898	BCL11B	B-cell CLL/lymphoma 11B (zinc finger protein)	0	0	0	0	0	0	1	1	0	1	1
hsa-miR-29a	MIMAT0000086	NM_022910	NDRG4	NDRG family member 4	0	0	1	0	0	0	1	1	0	1	0
hsa-miR-29a	MIMAT0000086	NM_024022	TMPRSS3	transmembrane protease, serine 3	0	0	0	0	0	0	1	1	0	1	1
hsa-miR-29a	MIMAT0000086	NM_024037	C1orf135	chromosome 1 open reading frame 135	0	0	1	1	0	0	0	1	0	1	0
hsa-miR-29a	MIMAT0000086	NM_024052	C17orf39	chromosome 17 open reading frame 39	0	0	0	0	0	0	1	1	0	1	1
hsa-miR-29a	MIMAT0000086	NM_024085	ATG9A	ATG9 autophagy related 9 homolog A (S. cerevisiae)	0	0	1	0	0	0	1	1	0	1	0
hsa-miR-29a	MIMAT0000086	NM_024296	CCDC28B	coiled-coil domain containing 28B	0	0	1	0	0	0	1	1	0	1	0
hsa-miR-29a	MIMAT0000086	NM_001423	EMP1	epithelial membrane protein 1	0	0	0	0	0	0	1	1	0	1	1
hsa-miR-29a	MIMAT0000086	NM_000046	ARSB	arylsulfatase B	0	0	1	1	0	0	0	1	0	1	0
hsa-miR-29a	MIMAT0000086	NM_018223	CHFR	checkpoint with forkhead and ring finger domains	0	0	1	0	0	0	0	1	0	1	1
hsa-miR-29a	MIMAT0000086	NM_018226	RNPEPL1	arginyl aminopeptidase (aminopeptidase B)-like 1	0	0	1	0	0	0	1	1	0	1	0
hsa-miR-29a	MIMAT0000086	NM_002996	CX3CL1	chemokine (C-X3-C motif) ligand 1	0	0	0	0	0	0	1	1	0	1	1
hsa-miR-29a	MIMAT0000086	NM_018260	ZNF701	zinc finger protein 701	0	0	1	1	0	0	0	1	0	1	0
hsa-miR-29a	MIMAT0000086	NM_018268	WDR41	WD repeat domain 41	0	0	1	1	0	0	0	1	0	1	0
hsa-miR-29a	MIMAT0000086	NM_018325	C9orf72	chromosome 9 open reading frame 72	0	0	0	0	0	0	1	1	0	1	1
hsa-miR-29a	MIMAT0000086	NM_002941	ROBO1	roundabout, axon guidance receptor, homolog 1 (Drosophila)	0	0	1	1	0	0	0	1	0	1	0
hsa-miR-29a	MIMAT0000086	NM_002940	ABCE1	ATP-binding cassette, sub-family E (OABP), member 1	0	0	0	1	0	0	1	1	0	1	0
hsa-miR-29a	MIMAT0000086	NM_002922	RGS1	regulator of G-protein signaling 1	0	0	1	1	0	0	0	1	0	1	0
hsa-miR-29a	MIMAT0000086	NM_018684	KIAA1166	KIAA1166	0	0	0	0	0	0	1	1	0	1	1
hsa-miR-29a	MIMAT0000086	NM_002912	REV3L	REV3-like, catalytic subunit of DNA polymerase zeta (yeast)	0	0	0	0	0	0	1	1	0	1	1
hsa-miR-29a	MIMAT0000086	NM_018704	CTTNBP2NL	CTTNBP2 N-terminal like	0	0	1	1	0	0	0	1	0	1	0
hsa-miR-29a	MIMAT0000086	NM_018715	RCC2	regulator of chromosome condensation 2	0	0	1	0	0	0	0	1	0	1	1
hsa-miR-29a	MIMAT0000086	NM_003036	SKI	v-ski sarcoma viral oncogene homolog (avian)	0	0	0	0	0	0	1	1	0	1	1
hsa-miR-29a	MIMAT0000086	NM_018048	MAGOHB	mago-nashi homolog B (Drosophila)	0	0	1	1	0	0	0	1	0	1	0
hsa-miR-29a	MIMAT0000086	NM_017459	MFAP2	microfibrillar-associated protein 2	0	0	1	0	0	0	1	1	0	1	0
hsa-miR-29a	MIMAT0000086	NM_017510	TMED9	transmembrane emp24 protein transport domain containing 9	0	0	0	0	0	0	1	1	0	1	1
hsa-miR-29a	MIMAT0000086	NM_017582	UBE2Q1	ubiquitin-conjugating enzyme E2Q family member 1	0	0	0	0	0	0	1	1	0	1	1
hsa-miR-29a	MIMAT0000086	NM_003421	ZNF37A	zinc finger protein 37A	0	0	1	1	0	0	0	1	0	1	0
hsa-miR-29a	MIMAT0000086	NM_017658	KLHL28	kelch-like 28 (Drosophila)	0	0	1	0	0	0	0	1	0	1	1
hsa-miR-29a	MIMAT0000086	NM_003407	ZFP36	zinc finger protein 36, C3H type, homolog (mouse)	0	0	0	0	0	0	1	1	0	1	1
hsa-miR-29a	MIMAT0000086	NM_003403	YY1	YY1 transcription factor	0	0	0	0	0	0	1	1	0	1	1
hsa-miR-29a	MIMAT0000086	NM_003373	VCL	vinculin	0	0	1	0	0	0	0	1	0	1	1
hsa-miR-29a	MIMAT0000086	NM_017870	TMEM132A	transmembrane protein 132A	0	0	0	0	0	0	1	1	0	1	1
hsa-miR-29a	MIMAT0000086	NM_017919	STX17	syntaxin 17	0	0	0	0	0	0	1	1	0	1	1
hsa-miR-29a	MIMAT0000086	NM_017955	CDCA4	cell division cycle associated 4	0	0	1	0	0	0	0	1	0	1	1
hsa-miR-29a	MIMAT0000086	NM_018027	FRMD4A	FERM domain containing 4A	0	0	0	0	0	0	1	1	0	1	1
hsa-miR-29a	MIMAT0000086	NM_018040	GPATCH2	G patch domain containing 2	0	0	1	1	0	0	0	1	0	1	0
hsa-miR-29a	MIMAT0000086	NM_002855	PVRL1	poliovirus receptor-related 1 (herpesvirus entry mediator C)	0	0	1	0	0	0	0	1	0	1	1
hsa-miR-29a	MIMAT0000086	NM_002852	PTX3	pentraxin-related gene, rapidly induced by IL-1 beta	0	0	1	1	0	0	0	1	0	1	0
hsa-miR-29a	MIMAT0000086	NM_002844	PTPRK	protein tyrosine phosphatase, receptor type, K	0	0	1	1	0	0	0	1	0	1	0
hsa-miR-29a	MIMAT0000086	NM_002387	MCC	mutated in colorectal cancers	0	0	1	1	0	0	0	1	0	1	0
hsa-miR-29a	MIMAT0000086	NM_019605	SERTAD4	SERTA domain containing 4	0	0	1	1	0	0	0	1	0	1	0
hsa-miR-29a	MIMAT0000086	NM_019859	HTR7	5-hydroxytryptamine (serotonin) receptor 7 (adenylate cyclase-coupled)	0	0	0	0	0	0	1	1	0	1	1
hsa-miR-29a	MIMAT0000086	NM_019860	HTR7	5-hydroxytryptamine (serotonin) receptor 7 (adenylate cyclase-coupled)	0	0	1	0	0	0	1	1	0	1	0
hsa-miR-29a	MIMAT0000086	NM_019887	DIABLO	diablo homolog (Drosophila)	0	0	0	0	0	0	1	1	0	1	1
hsa-miR-29a	MIMAT0000086	NM_002376	MARK3	MAP/microtubule affinity-regulating kinase 3	0	0	0	0	0	0	1	1	0	1	1
hsa-miR-29a	MIMAT0000086	NM_002357	MXD1	MAX dimerization protein 1	0	0	1	1	0	0	0	1	0	1	0
hsa-miR-29a	MIMAT0000086	NM_020248	CTNNBIP1	catenin, beta interacting protein 1	0	0	1	0	0	0	1	1	0	1	0
hsa-miR-29a	MIMAT0000086	NM_020338	ZMIZ1	zinc finger, MIZ-type containing 1	0	0	0	0	0	0	1	1	0	1	1
hsa-miR-29a	MIMAT0000086	NM_020375	C12orf5	chromosome 12 open reading frame 5	0	0	1	1	0	0	0	1	0	1	0
hsa-miR-29a	MIMAT0000086	NM_020382	SETD8	SET domain containing (lysine methyltransferase) 8	0	0	0	0	0	0	1	1	0	1	1
hsa-miR-29a	MIMAT0000086	NM_002268	KPNA4	karyopherin alpha 4 (importin alpha 3)	0	0	0	0	0	0	1	1	0	1	1
hsa-miR-29a	MIMAT0000086	NM_002264	KPNA1	karyopherin alpha 1 (importin alpha 5)	0	0	1	0	0	0	0	1	0	1	1
hsa-miR-29a	MIMAT0000086	NM_019096	GTPBP2	GTP binding protein 2	0	0	0	0	0	0	1	1	0	1	1
hsa-miR-29a	MIMAT0000086	NM_019084	CCNJ	cyclin J	0	0	1	1	0	0	0	1	0	1	0
hsa-miR-29a	MIMAT0000086	NM_002758	MAP2K6	mitogen-activated protein kinase kinase 6	0	0	0	0	0	0	1	1	0	1	1
hsa-miR-29a	MIMAT0000086	NM_018902	PCDHA11	protocadherin alpha 11	0	0	0	1	0	0	1	1	0	1	0
hsa-miR-29a	MIMAT0000086	NM_002688	SEPT5	septin 5	0	0	1	0	0	0	0	1	0	1	1
hsa-miR-29a	MIMAT0000086	NM_002655	PLAG1	pleiomorphic adenoma gene 1	0	0	0	0	0	0	1	1	0	1	1
hsa-miR-29a	MIMAT0000086	NM_002608	PDGFB	platelet-derived growth factor beta polypeptide (simian sarcoma viral (v-sis) oncogene homolog)	0	0	0	0	0	0	1	1	0	1	1
hsa-miR-29a	MIMAT0000086	NM_002579	PALM	paralemmin	0	0	1	0	0	0	1	1	0	1	0
hsa-miR-29a	MIMAT0000086	NM_002483	CEACAM6	carcinoembryonic antigen-related cell adhesion molecule 6 (non-specific cross reacting antigen)	0	0	1	1	0	0	0	1	0	1	0
hsa-miR-29a	MIMAT0000086	NM_018970	GPR85	G protein-coupled receptor 85	0	0	0	0	0	0	1	1	0	1	1
hsa-miR-29a	MIMAT0000086	NM_018977	NLGN3	neuroligin 3	0	0	0	0	0	0	1	1	0	1	1
hsa-miR-29a	MIMAT0000086	NM_019008	SMCR7L	Smith-Magenis syndrome chromosome region, candidate 7-like	0	0	0	0	0	0	1	1	0	1	1
hsa-miR-29a	MIMAT0000086	NM_019036	HMGCLL1	3-hydroxymethyl-3-methylglutaryl-Coenzyme A lyase-like 1	0	0	1	1	0	0	0	1	0	1	0
hsa-miR-29a	MIMAT0000086	NM_019049	DENND1B	DENN/MADD domain containing 1B	0	0	0	0	0	0	1	1	0	1	1
hsa-miR-29a	MIMAT0000086	NM_002402	MEST	mesoderm specific transcript homolog (mouse)	0	0	1	1	0	0	0	1	0	1	0
hsa-miR-29a	MIMAT0000086	NM_002211	ITGB1	integrin, beta 1 (fibronectin receptor, beta polypeptide, antigen CD29 includes MDF2, MSK12)	0	0	0	0	0	0	1	1	0	1	1
