# Supplementary material for: Astrocyte-Derived Small Extracellular Vesicles Regulate Dendritic Complexity through miR-26a-5p Activity
Source: Preprints.org preprint supplement (doi:10.20944/preprints202002.0250.v1), 2020-02-17
Supplement: Supplementary file 17 [file mir32.xls]

# "1" : interaction predicted; "0" : interaction not predicted.
miRNA ID	miRNA Acc	Refseq	Symbol	Description	diana	microinspector	miranda	mirtarget2	mitarget	nbmirtar	pictar	pita	rna22	rnahybrid	targetscan
hsa-miR-32	MIMAT0000090	NM_198337	INSIG1	insulin induced gene 1	0	0	1	1	0	0	1	1	0	1	1
hsa-miR-32	MIMAT0000090	NM_015497	TMEM87A	transmembrane protein 87A	0	0	1	1	0	0	1	1	0	1	1
hsa-miR-32	MIMAT0000090	NM_015358	MORC3	MORC family CW-type zinc finger 3	0	0	1	1	0	0	1	1	0	1	1
hsa-miR-32	MIMAT0000090	NM_007014	WWP2	WW domain containing E3 ubiquitin protein ligase 2	0	0	1	1	0	0	1	1	0	1	1
hsa-miR-32	MIMAT0000090	NM_007207	DUSP10	dual specificity phosphatase 10	0	0	1	1	0	0	1	1	0	1	1
hsa-miR-32	MIMAT0000090	NM_052900	CSMD3	CUB and Sushi multiple domains 3	0	0	1	1	0	0	1	1	0	1	1
hsa-miR-32	MIMAT0000090	NM_003216	TEF	thyrotrophic embryonic factor	0	0	1	1	0	0	1	1	0	1	1
hsa-miR-32	MIMAT0000090	NM_015040	PIP5K3	phosphatidylinositol-3-phosphate/phosphatidylinositol 5-kinase, type III	0	0	1	1	0	0	1	1	0	1	1
hsa-miR-32	MIMAT0000090	NM_024052	C17orf39	chromosome 17 open reading frame 39	0	0	1	1	0	0	1	1	0	1	1
hsa-miR-32	MIMAT0000090	NM_003178	SYN2	synapsin II	0	0	1	1	0	0	1	1	0	1	1
hsa-miR-32	MIMAT0000090	NM_014991	WDFY3	WD repeat and FYVE domain containing 3	0	0	1	1	0	0	1	1	0	1	1
hsa-miR-32	MIMAT0000090	NM_003139	SRPR	signal recognition particle receptor ("docking protein")	0	0	1	1	0	0	1	1	0	1	1
hsa-miR-32	MIMAT0000090	NM_015509	NECAP1	NECAP endocytosis associated 1	0	0	1	1	0	0	1	1	0	1	1
hsa-miR-32	MIMAT0000090	NM_015537	NELF	nasal embryonic LHRH factor	0	0	1	1	0	0	1	1	0	1	1
hsa-miR-32	MIMAT0000090	NM_030627	CPEB4	cytoplasmic polyadenylation element binding protein 4	0	0	1	1	0	0	1	1	0	1	1
hsa-miR-32	MIMAT0000090	NM_006727	CDH10	cadherin 10, type 2 (T2-cadherin)	0	0	1	1	0	0	1	1	0	1	1
hsa-miR-32	MIMAT0000090	NM_006751	SSFA2	sperm specific antigen 2	0	0	1	1	0	0	1	1	0	1	1
hsa-miR-32	MIMAT0000090	NM_016277	RAB23	RAB23, member RAS oncogene family	0	0	1	1	0	0	1	1	0	1	1
hsa-miR-32	MIMAT0000090	NM_194250	ZNF804A	zinc finger protein 804A	0	0	1	1	0	0	1	1	0	1	1
hsa-miR-32	MIMAT0000090	NM_080552	SLC32A1	solute carrier family 32 (GABA vesicular transporter), member 1	0	0	1	1	0	0	1	1	0	1	1
hsa-miR-32	MIMAT0000090	NM_016218	POLK	polymerase (DNA directed) kappa	0	0	1	1	0	0	1	1	0	1	1
hsa-miR-32	MIMAT0000090	NM_006997	TACC2	transforming, acidic coiled-coil containing protein 2	0	0	1	1	0	0	1	1	0	1	1
hsa-miR-32	MIMAT0000090	NM_003583	DYRK2	dual-specificity tyrosine-(Y)-phosphorylation regulated kinase 2	0	0	1	1	0	0	1	1	0	1	1
hsa-miR-32	MIMAT0000090	NM_003580	NSMAF	neutral sphingomyelinase (N-SMase) activation associated factor	0	0	1	1	0	0	1	1	0	1	1
hsa-miR-32	MIMAT0000090	NM_006999	POLS	polymerase (DNA directed) sigma	0	0	1	1	0	0	1	1	0	1	1
hsa-miR-32	MIMAT0000090	NM_003498	SNN	stannin	0	0	1	1	0	0	1	1	0	1	1
hsa-miR-32	MIMAT0000090	NM_014912	CPEB3	cytoplasmic polyadenylation element binding protein 3	0	0	1	1	0	0	1	1	0	1	1
hsa-miR-32	MIMAT0000090	NM_001781	CD69	CD69 molecule	0	0	1	1	0	0	1	1	0	1	1
hsa-miR-32	MIMAT0000090	NM_014552	GRHL1	grainyhead-like 1 (Drosophila)	0	0	1	1	0	0	1	1	0	1	1
hsa-miR-32	MIMAT0000090	NM_213609	FAM19A1	family with sequence similarity 19 (chemokine (C-C motif)-like), member A1	0	0	1	1	0	0	1	1	0	1	1
hsa-miR-32	MIMAT0000090	NM_180989	GPR180	G protein-coupled receptor 180	0	0	1	1	0	0	1	1	0	1	1
hsa-miR-32	MIMAT0000090	NM_002372	MAN2A1	mannosidase, alpha, class 2A, member 1	0	0	1	1	0	0	1	1	0	1	1
hsa-miR-32	MIMAT0000090	NM_032968	PCDH11X	protocadherin 11 X-linked	0	0	1	1	0	0	1	1	0	1	1
hsa-miR-32	MIMAT0000090	NM_002480	PPP1R12A	protein phosphatase 1, regulatory (inhibitor) subunit 12A	0	0	1	1	0	0	1	1	0	1	1
hsa-miR-32	MIMAT0000090	NM_033211	C5orf30	chromosome 5 open reading frame 30	0	0	1	1	0	0	1	1	0	1	1
hsa-miR-32	MIMAT0000090	NM_013450	BAZ2B	bromodomain adjacent to zinc finger domain, 2B	0	0	1	1	0	0	1	1	0	1	1
hsa-miR-32	MIMAT0000090	NM_032973	PCDH11Y	protocadherin 11 Y-linked	0	0	1	1	0	0	1	1	0	1	1
hsa-miR-32	MIMAT0000090	NM_002938	RNF4	ring finger protein 4	0	0	1	1	0	0	1	1	0	1	1
hsa-miR-32	MIMAT0000090	NM_178140	PDZD2	PDZ domain containing 2	0	0	1	1	0	0	1	1	0	1	1
hsa-miR-32	MIMAT0000090	NM_002222	ITPR1	inositol 1,4,5-triphosphate receptor, type 1	0	0	1	1	0	0	1	1	0	1	1
hsa-miR-32	MIMAT0000090	NM_014572	LATS2	LATS, large tumor suppressor, homolog 2 (Drosophila)	0	0	1	1	0	0	1	1	0	1	1
hsa-miR-32	MIMAT0000090	NM_002205	ITGA5	integrin, alpha 5 (fibronectin receptor, alpha polypeptide)	0	0	1	1	0	0	1	1	0	1	1
hsa-miR-32	MIMAT0000090	NM_014901	RNF44	ring finger protein 44	0	0	1	1	0	0	1	1	0	1	1
hsa-miR-32	MIMAT0000090	NM_014876	JOSD1	Josephin domain containing 1	0	0	1	1	0	0	1	1	0	1	1
hsa-miR-32	MIMAT0000090	NM_003107	SOX4	SRY (sex determining region Y)-box 4	0	0	1	1	0	0	1	1	0	1	1
hsa-miR-32	MIMAT0000090	NM_012223	MYO1B	myosin IB	0	0	1	1	0	0	1	1	0	1	1
hsa-miR-32	MIMAT0000090	NM_032569	N-PAC	cytokine-like nuclear factor n-pac	0	0	1	1	0	0	1	1	0	1	1
hsa-miR-32	MIMAT0000090	NM_175607	CNTN4	contactin 4	0	0	1	1	0	0	1	1	0	1	1
hsa-miR-32	MIMAT0000090	NM_002024	FMR1	fragile X mental retardation 1	0	0	1	1	0	0	1	1	0	1	1
hsa-miR-32	MIMAT0000090	NM_002078	GOLGA4	golgi autoantigen, golgin subfamily a, 4	0	0	1	1	0	0	1	1	0	1	1
hsa-miR-32	MIMAT0000090	NM_014674	EDEM1	ER degradation enhancer, mannosidase alpha-like 1	0	0	1	1	0	0	1	1	0	1	1
hsa-miR-32	MIMAT0000090	NM_012297	G3BP2	GTPase activating protein (SH3 domain) binding protein 2	0	0	1	1	0	0	1	1	0	1	1
hsa-miR-32	MIMAT0000090	NM_003010	MAP2K4	mitogen-activated protein kinase kinase 4	0	0	1	1	0	0	1	1	0	1	1
hsa-miR-32	MIMAT0000090	NM_002912	REV3L	REV3-like, catalytic subunit of DNA polymerase zeta (yeast)	0	0	1	1	0	0	1	1	0	1	1
hsa-miR-32	MIMAT0000090	NM_000828	GRIA3	glutamate receptor, ionotrophic, AMPA 3	0	0	1	1	0	0	1	1	0	1	1
hsa-miR-32	MIMAT0000090	NM_000430	PAFAH1B1	platelet-activating factor acetylhydrolase, isoform Ib, alpha subunit 45kDa	0	0	1	1	0	0	1	1	0	1	1
hsa-miR-32	MIMAT0000090	NM_018976	SLC38A2	solute carrier family 38, member 2	0	0	1	1	0	0	1	1	0	1	1
hsa-miR-32	MIMAT0000090	NM_020346	SLC17A6	solute carrier family 17 (sodium-dependent inorganic phosphate cotransporter), member 6	0	0	1	1	0	0	1	1	0	1	1
hsa-miR-32	MIMAT0000090	NM_000368	TSC1	tuberous sclerosis 1	0	0	1	1	0	0	1	1	0	1	1
hsa-miR-32	MIMAT0000090	NM_022763	FNDC3B	fibronectin type III domain containing 3B	0	0	1	1	0	0	1	1	0	1	1
hsa-miR-32	MIMAT0000090	NM_018650	MARK1	MAP/microtubule affinity-regulating kinase 1	0	0	1	1	0	0	1	1	0	1	1
hsa-miR-32	MIMAT0000090	NM_022781	RNF38	ring finger protein 38	0	0	1	1	0	0	1	1	0	1	1
hsa-miR-32	MIMAT0000090	NM_001004360	DPP10	dipeptidyl-peptidase 10	0	0	1	1	0	0	1	1	0	1	1
hsa-miR-32	MIMAT0000090	NM_003895	SYNJ1	synaptojanin 1	0	0	1	1	0	0	1	1	0	1	1
hsa-miR-32	MIMAT0000090	NM_004745	DLGAP2	discs, large (Drosophila) homolog-associated protein 2	0	0	1	1	0	0	1	1	0	1	1
hsa-miR-32	MIMAT0000090	NM_005602	CLDN11	claudin 11 (oligodendrocyte transmembrane protein)	0	0	1	1	0	0	1	1	0	1	1
hsa-miR-32	MIMAT0000090	NM_005779	LHFPL2	lipoma HMGIC fusion partner-like 2	0	0	1	1	0	0	1	1	0	1	1
hsa-miR-32	MIMAT0000090	NM_022151	MOAP1	modulator of apoptosis 1	0	0	1	1	0	0	1	1	0	1	1
hsa-miR-32	MIMAT0000090	NM_005895	GOLGA3	golgi autoantigen, golgin subfamily a, 3	0	0	1	1	0	0	1	1	0	1	1
hsa-miR-32	MIMAT0000090	NM_020432	PHTF2	putative homeodomain transcription factor 2	0	0	1	1	0	0	1	1	0	1	1
hsa-miR-32	MIMAT0000090	NM_005904	SMAD7	SMAD family member 7	0	0	1	1	0	0	1	1	0	1	1
hsa-miR-32	MIMAT0000090	NM_001001974	PLEKHA1	pleckstrin homology domain containing, family A (phosphoinositide binding specific) member 1	0	0	1	1	0	0	1	1	0	1	1
hsa-miR-32	MIMAT0000090	NM_001002762	DNAJB12	DnaJ (Hsp40) homolog, subfamily B, member 12	0	0	1	1	0	0	1	1	0	1	1
hsa-miR-32	MIMAT0000090	NM_000489	ATRX	alpha thalassemia/mental retardation syndrome X-linked (RAD54 homolog, S. cerevisiae)	0	0	1	1	0	0	1	1	0	1	1
hsa-miR-32	MIMAT0000090	NM_018364	RSBN1	round spermatid basic protein 1	0	0	1	1	0	0	1	1	0	1	1
hsa-miR-32	MIMAT0000090	NM_004235	KLF4	Kruppel-like factor 4 (gut)	0	0	1	1	0	0	1	1	0	1	1
hsa-miR-32	MIMAT0000090	NM_199324	OTUD4	OTU domain containing 4	0	0	1	1	0	0	1	1	0	1	1
hsa-miR-32	MIMAT0000090	NM_207517	ADAMTSL3	ADAMTS-like 3	0	0	1	1	0	0	1	1	0	1	1
hsa-miR-32	MIMAT0000090	NM_144982	CCDC131	coiled-coil domain containing 131	0	0	1	1	0	0	1	1	0	1	1
hsa-miR-32	MIMAT0000090	NM_018045	BSDC1	BSD domain containing 1	0	0	1	1	0	0	1	1	0	1	1
hsa-miR-32	MIMAT0000090	NM_023037	FRY	furry homolog (Drosophila)	0	0	1	1	0	0	1	1	0	1	1
hsa-miR-32	MIMAT0000090	NM_000138	FBN1	fibrillin 1	0	0	1	1	0	0	1	1	0	1	1
hsa-miR-32	MIMAT0000090	NM_144665	SESN3	sestrin 3	0	0	1	1	0	0	1	1	0	1	1
hsa-miR-32	MIMAT0000090	NM_004993	ATXN3	ataxin 3	0	0	1	1	0	0	1	1	0	1	1
hsa-miR-32	MIMAT0000090	NM_005509	DMXL1	Dmx-like 1	0	0	1	1	0	0	1	1	0	1	1
hsa-miR-32	MIMAT0000090	NM_153261	TMEM188	transmembrane protein 188	0	0	1	1	0	0	1	1	0	1	1
hsa-miR-32	MIMAT0000090	NM_022893	BCL11A	B-cell CLL/lymphoma 11A (zinc finger protein)	0	0	1	1	0	0	1	1	0	1	1
hsa-miR-32	MIMAT0000090	NM_147189	FAM110B	family with sequence similarity 110, member B	0	0	1	1	0	0	1	1	0	1	1
hsa-miR-32	MIMAT0000090	NM_005603	ATP8B1	ATPase, class I, type 8B, member 1	0	0	1	1	0	0	0	1	0	1	1
hsa-miR-32	MIMAT0000090	NM_005749	TOB1	transducer of ERBB2, 1	0	0	1	1	0	0	1	1	0	0	1
hsa-miR-32	MIMAT0000090	NM_007197	FZD10	frizzled homolog 10 (Drosophila)	0	0	0	1	0	0	1	1	0	1	1
hsa-miR-32	MIMAT0000090	NM_007007	CPSF6	cleavage and polyadenylation specific factor 6, 68kDa	0	0	1	0	0	0	1	1	0	1	1
hsa-miR-32	MIMAT0000090	NM_005257	GATA6	GATA binding protein 6	0	0	1	0	0	0	1	1	0	1	1
hsa-miR-32	MIMAT0000090	NM_012428	NPTN	neuroplastin	0	0	0	1	0	0	1	1	0	1	1
hsa-miR-32	MIMAT0000090	NM_144949	SOCS5	suppressor of cytokine signaling 5	0	0	1	1	0	0	1	1	0	1	0
hsa-miR-32	MIMAT0000090	NM_005585	SMAD6	SMAD family member 6	0	0	0	1	0	0	1	1	0	1	1
hsa-miR-32	MIMAT0000090	NM_005595	NFIA	nuclear factor I/A	0	0	0	1	0	0	1	1	0	1	1
hsa-miR-32	MIMAT0000090	NM_005400	PRKCE	protein kinase C, epsilon	0	0	1	0	0	0	1	1	0	1	1
hsa-miR-32	MIMAT0000090	NM_012419	RGS17	regulator of G-protein signaling 17	0	0	1	1	0	0	0	1	0	1	1
hsa-miR-32	MIMAT0000090	NM_012328	DNAJB9	DnaJ (Hsp40) homolog, subfamily B, member 9	0	0	0	1	0	0	1	1	0	1	1
hsa-miR-32	MIMAT0000090	NM_012288	TRAM2	translocation associated membrane protein 2	0	0	1	0	0	0	1	1	0	1	1
hsa-miR-32	MIMAT0000090	NM_033274	ADAM19	ADAM metallopeptidase domain 19 (meltrin beta)	0	0	1	0	0	0	1	1	0	1	1
hsa-miR-32	MIMAT0000090	NM_144728	DUSP10	dual specificity phosphatase 10	0	0	1	1	0	0	1	1	0	1	0
hsa-miR-32	MIMAT0000090	NM_144488	RGS3	regulator of G-protein signaling 3	0	0	1	1	0	0	1	1	0	1	0
hsa-miR-32	MIMAT0000090	NM_033631	LUZP1	leucine zipper protein 1	0	0	1	0	0	0	1	1	0	1	1
hsa-miR-32	MIMAT0000090	NM_080546	SLC44A1	solute carrier family 44, member 1	0	0	1	0	0	0	1	1	0	1	1
hsa-miR-32	MIMAT0000090	NM_006315	PCGF3	polycomb group ring finger 3	0	0	1	0	0	0	1	1	0	1	1
hsa-miR-32	MIMAT0000090	NM_006763	BTG2	BTG family, member 2	0	0	0	1	0	0	1	1	0	1	1
hsa-miR-32	MIMAT0000090	NM_080617	CBLN4	cerebellin 4 precursor	0	0	0	1	0	0	1	1	0	1	1
hsa-miR-32	MIMAT0000090	NM_006633	IQGAP2	IQ motif containing GTPase activating protein 2	0	0	1	0	0	0	1	1	0	1	1
hsa-miR-32	MIMAT0000090	NM_080645	COL12A1	collagen, type XII, alpha 1	0	0	1	1	0	0	1	1	0	1	0
hsa-miR-32	MIMAT0000090	NM_130395	WRNIP1	Werner helicase interacting protein 1	0	0	1	1	0	0	1	1	0	1	0
hsa-miR-32	MIMAT0000090	NM_006599	NFAT5	nuclear factor of activated T-cells 5, tonicity-responsive	0	0	1	0	0	0	1	1	0	1	1
hsa-miR-32	MIMAT0000090	NM_020693	DSCAML1	Down syndrome cell adhesion molecule like 1	0	0	1	0	0	0	1	1	0	1	1
hsa-miR-32	MIMAT0000090	NM_130795	RGS3	regulator of G-protein signaling 3	0	0	1	1	0	0	1	1	0	1	0
hsa-miR-32	MIMAT0000090	NM_006544	EXOC5	exocyst complex component 5	0	0	1	0	0	0	1	1	0	1	1
hsa-miR-32	MIMAT0000090	NM_006538	BCL2L11	BCL2-like 11 (apoptosis facilitator)	0	0	1	0	0	0	1	1	0	1	1
hsa-miR-32	MIMAT0000090	NM_006489	NOVA1	neuro-oncological ventral antigen 1	0	0	1	1	0	0	1	1	0	1	0
hsa-miR-32	MIMAT0000090	NM_006981	NR4A3	nuclear receptor subfamily 4, group A, member 3	0	0	1	0	0	0	1	1	0	1	1
hsa-miR-32	MIMAT0000090	NM_133646	ZAK	sterile alpha motif and leucine zipper containing kinase AZK	0	0	1	0	0	0	1	1	0	1	1
hsa-miR-32	MIMAT0000090	NM_006265	RAD21	RAD21 homolog (S. pombe)	0	0	0	1	0	0	1	1	0	1	1
hsa-miR-32	MIMAT0000090	NM_005811	GDF11	growth differentiation factor 11	0	0	1	0	0	0	1	1	0	1	1
hsa-miR-32	MIMAT0000090	NM_033632	FBXW7	F-box and WD repeat domain containing 7	0	0	1	1	0	0	1	1	0	1	0
hsa-miR-32	MIMAT0000090	NM_005920	MEF2D	myocyte enhancer factor 2D	0	0	1	0	0	0	1	1	0	1	1
hsa-miR-32	MIMAT0000090	NM_012096	APPL1	adaptor protein, phosphotyrosine interaction, PH domain and leucine zipper containing 1	0	0	1	1	0	0	0	1	0	1	1
hsa-miR-32	MIMAT0000090	NM_006080	SEMA3A	sema domain, immunoglobulin domain (Ig), short basic domain, secreted, (semaphorin) 3A	0	0	1	0	0	0	1	1	0	1	1
hsa-miR-32	MIMAT0000090	NM_052937	PCMTD1	protein-L-isoaspartate (D-aspartate) O-methyltransferase domain containing 1	0	0	1	1	0	0	0	1	0	1	1
hsa-miR-32	MIMAT0000090	NM_007325	GRIA3	glutamate receptor, ionotrophic, AMPA 3	0	0	1	1	0	0	1	1	0	1	0
hsa-miR-32	MIMAT0000090	NM_138270	ATRX	alpha thalassemia/mental retardation syndrome X-linked (RAD54 homolog, S. cerevisiae)	0	0	1	1	0	0	1	1	0	1	0
hsa-miR-32	MIMAT0000090	NM_007118	TRIO	triple functional domain (PTPRF interacting)	0	0	0	1	0	0	1	1	0	1	1
hsa-miR-32	MIMAT0000090	NM_078471	MYO18A	myosin XVIIIA	0	0	1	0	0	0	1	1	0	1	1
hsa-miR-32	MIMAT0000090	NM_006158	NEFL	neurofilament, light polypeptide 68kDa	0	0	1	1	0	0	0	1	0	1	1
hsa-miR-32	MIMAT0000090	NM_006178	NSF	N-ethylmaleimide-sensitive factor	0	0	0	1	0	0	1	1	0	1	1
hsa-miR-32	MIMAT0000090	NM_006201	PCTK1	PCTAIRE protein kinase 1	0	0	1	0	0	0	1	1	0	1	1
hsa-miR-32	MIMAT0000090	NM_006482	DYRK2	dual-specificity tyrosine-(Y)-phosphorylation regulated kinase 2	0	0	1	1	0	0	1	1	0	1	0
hsa-miR-32	MIMAT0000090	NM_021076	NEFH	neurofilament, heavy polypeptide 200kDa	0	0	0	1	0	0	1	1	0	1	1
hsa-miR-32	MIMAT0000090	NM_018315	FBXW7	F-box and WD repeat domain containing 7	0	0	0	1	0	0	1	1	0	1	1
hsa-miR-32	MIMAT0000090	NM_022817	PER2	period homolog 2 (Drosophila)	0	0	1	0	0	0	1	1	0	1	1
hsa-miR-32	MIMAT0000090	NM_018718	TSGA14	testis specific, 14	0	0	0	1	0	0	1	1	0	1	1
hsa-miR-32	MIMAT0000090	NM_018719	CDCA7L	cell division cycle associated 7-like	0	0	0	1	0	0	1	1	0	1	1
hsa-miR-32	MIMAT0000090	NM_022475	HHIP	hedgehog interacting protein	0	0	1	0	0	0	1	1	0	1	1
hsa-miR-32	MIMAT0000090	NM_019027	RBM47	RNA binding motif protein 47	0	0	0	1	0	0	1	1	0	1	1
hsa-miR-32	MIMAT0000090	NM_019042	PUS7	pseudouridylate synthase 7 homolog (S. cerevisiae)	0	0	1	0	0	0	1	1	0	1	1
hsa-miR-32	MIMAT0000090	NM_022373	HERPUD2	HERPUD family member 2	0	0	1	1	0	0	1	1	0	0	1
hsa-miR-32	MIMAT0000090	NM_018120	ARMC1	armadillo repeat containing 1	0	0	0	1	0	0	1	1	0	1	1
hsa-miR-32	MIMAT0000090	NM_018113	LMBR1L	limb region 1 homolog (mouse)-like	0	0	1	0	0	0	1	1	0	1	1
hsa-miR-32	MIMAT0000090	NM_017519	ARID1B	AT rich interactive domain 1B (SWI1-like)	0	0	0	1	0	0	1	1	0	1	1
hsa-miR-32	MIMAT0000090	NM_024664	PPCS	phosphopantothenoylcysteine synthetase	0	0	1	1	0	0	1	1	0	1	0
hsa-miR-32	MIMAT0000090	NM_024565	CCNJL	cyclin J-like	0	0	1	1	0	0	0	1	0	1	1
hsa-miR-32	MIMAT0000090	NM_017626	DNAJB12	DnaJ (Hsp40) homolog, subfamily B, member 12	0	0	1	1	0	0	1	1	0	1	0
hsa-miR-32	MIMAT0000090	NM_024422	DSC2	desmocollin 2	0	0	0	1	0	0	1	1	0	1	1
hsa-miR-32	MIMAT0000090	NM_015020	PHLPPL	PH domain and leucine rich repeat protein phosphatase-like	0	0	1	1	0	0	0	1	0	1	1
hsa-miR-32	MIMAT0000090	NM_017803	DUS2L	dihydrouridine synthase 2-like, SMM1 homolog (S. cerevisiae)	0	0	0	1	0	0	1	1	0	1	1
hsa-miR-32	MIMAT0000090	NM_023927	GRAMD3	GRAM domain containing 3	0	0	0	1	0	0	1	1	0	1	1
hsa-miR-32	MIMAT0000090	NM_020135	WRNIP1	Werner helicase interacting protein 1	0	0	0	1	0	0	1	1	0	1	1
hsa-miR-32	MIMAT0000090	NM_022169	ABCG4	ATP-binding cassette, sub-family G (WHITE), member 4	0	0	1	0	0	0	1	1	0	1	1
hsa-miR-32	MIMAT0000090	NM_021620	PRDM13	PR domain containing 13	0	0	0	1	0	0	1	1	0	1	1
hsa-miR-32	MIMAT0000090	NM_021252	RAB18	RAB18, member RAS oncogene family	0	0	1	0	0	0	1	1	0	1	1
hsa-miR-32	MIMAT0000090	NM_020868	DPP10	dipeptidyl-peptidase 10	0	0	1	1	0	0	1	1	0	1	0
hsa-miR-32	MIMAT0000090	NM_020886	USP28	ubiquitin specific peptidase 28	0	0	0	1	0	0	1	1	0	1	1
hsa-miR-32	MIMAT0000090	NM_021161	KCNK10	potassium channel, subfamily K, member 10	0	0	1	0	0	0	1	1	0	1	1
hsa-miR-32	MIMAT0000090	NM_021106	RGS3	regulator of G-protein signaling 3	0	0	0	1	0	0	1	1	0	1	1
hsa-miR-32	MIMAT0000090	NM_020940	FAM160B1	family with sequence similarity 160, member B1	0	0	1	1	0	0	0	1	0	1	1
hsa-miR-32	MIMAT0000090	NM_020964	KIAA1632	KIAA1632	0	0	1	1	0	0	0	1	0	1	1
hsa-miR-32	MIMAT0000090	NM_020805	KLHL14	kelch-like 14 (Drosophila)	0	0	1	1	0	0	0	1	0	1	1
hsa-miR-32	MIMAT0000090	NM_020801	ARRDC3	arrestin domain containing 3	0	0	0	1	0	0	1	1	0	1	1
hsa-miR-32	MIMAT0000090	NM_022167	XYLT2	xylosyltransferase II	0	0	1	0	0	0	1	1	0	1	1
hsa-miR-32	MIMAT0000090	NM_020245	TULP4	tubby like protein 4	0	0	1	1	0	0	1	1	0	1	0
hsa-miR-32	MIMAT0000090	NM_021973	HAND2	heart and neural crest derivatives expressed 2	0	0	1	0	0	0	1	1	0	1	1
hsa-miR-32	MIMAT0000090	NM_021961	TEAD1	TEA domain family member 1 (SV40 transcriptional enhancer factor)	0	0	0	1	0	0	1	1	0	1	1
hsa-miR-32	MIMAT0000090	NM_020708	SLC12A5	solute carrier family 12, (potassium-chloride transporter) member 5	0	0	0	1	0	0	1	1	0	1	1
hsa-miR-32	MIMAT0000090	NM_021639	GPBP1L1	GC-rich promoter binding protein 1-like 1	0	0	0	1	0	0	1	1	0	1	1
hsa-miR-32	MIMAT0000090	NM_021622	PLEKHA1	pleckstrin homology domain containing, family A (phosphoinositide binding specific) member 1	0	0	1	1	0	0	1	1	0	1	0
hsa-miR-32	MIMAT0000090	NM_020778	ALPK3	alpha-kinase 3	0	0	1	0	0	0	1	1	0	1	1
hsa-miR-32	MIMAT0000090	NM_024665	TBL1XR1	transducin (beta)-like 1 X-linked receptor 1	0	0	1	1	0	0	0	1	0	1	1
hsa-miR-32	MIMAT0000090	NM_024692	CLIP4	CAP-GLY domain containing linker protein family, member 4	0	0	1	0	0	0	1	1	0	1	1
hsa-miR-32	MIMAT0000090	NM_032552	DAB2IP	DAB2 interacting protein	0	0	1	0	0	0	1	1	0	1	1
hsa-miR-32	MIMAT0000090	NM_032444	BTBD12	BTB (POZ) domain containing 12	0	0	0	1	0	0	1	1	0	1	1
hsa-miR-32	MIMAT0000090	NM_014935	PLEKHA6	pleckstrin homology domain containing, family A member 6	0	0	1	0	0	0	1	1	0	1	1
hsa-miR-32	MIMAT0000090	NM_032440	LCOR	ligand dependent nuclear receptor corepressor	0	0	1	0	0	0	1	1	0	1	1
hsa-miR-32	MIMAT0000090	NM_032317	DNAJC30	DnaJ (Hsp40) homolog, subfamily C, member 30	0	0	1	1	0	0	0	1	0	1	1
hsa-miR-32	MIMAT0000090	NM_015049	TRAK2	trafficking protein, kinesin binding 2	0	0	1	0	0	0	1	1	0	1	1
hsa-miR-32	MIMAT0000090	NM_015057	MYCBP2	MYC binding protein 2	0	0	0	1	0	0	1	1	0	1	1
hsa-miR-32	MIMAT0000090	NM_015125	CIC	capicua homolog (Drosophila)	0	0	1	1	0	0	1	1	0	1	0
hsa-miR-32	MIMAT0000090	NM_014798	PLEKHM1	pleckstrin homology domain containing, family M (with RUN domain) member 1	0	0	1	0	0	0	1	1	0	1	1
hsa-miR-32	MIMAT0000090	NM_014786	ARHGEF17	Rho guanine nucleotide exchange factor (GEF) 17	0	0	1	0	0	0	1	1	0	1	1
hsa-miR-32	MIMAT0000090	NM_013368	SERTAD3	SERTA domain containing 3	0	0	1	0	0	0	1	1	0	1	1
hsa-miR-32	MIMAT0000090	NM_013449	BAZ2A	bromodomain adjacent to zinc finger domain, 2A	0	0	1	0	0	0	1	1	0	1	1
hsa-miR-32	MIMAT0000090	NM_014011	SOCS5	suppressor of cytokine signaling 5	0	0	0	1	0	0	1	1	0	1	1
hsa-miR-32	MIMAT0000090	NM_032969	PCDH11X	protocadherin 11 X-linked	0	0	1	1	0	0	1	1	0	1	0
hsa-miR-32	MIMAT0000090	NM_014631	SH3PXD2A	SH3 and PX domains 2A	0	0	1	1	0	0	0	1	0	1	1
hsa-miR-32	MIMAT0000090	NM_014647	KIAA0430	KIAA0430	0	0	1	0	0	0	1	1	0	1	1
hsa-miR-32	MIMAT0000090	NM_032632	PAPOLA	poly(A) polymerase alpha	0	0	1	0	0	0	1	1	0	1	1
hsa-miR-32	MIMAT0000090	NM_014776	GIT2	G protein-coupled receptor kinase interactor 2	0	0	1	0	0	0	1	1	0	1	1
hsa-miR-32	MIMAT0000090	NM_015200	PDS5A	PDS5, regulator of cohesion maintenance, homolog A (S. cerevisiae)	0	0	1	0	0	0	1	1	0	1	1
hsa-miR-32	MIMAT0000090	NM_015265	SATB2	SATB homeobox 2	0	0	1	0	0	0	1	1	0	1	1
hsa-miR-32	MIMAT0000090	NM_015878	AZIN1	antizyme inhibitor 1	0	0	1	0	0	0	1	1	0	1	1
hsa-miR-32	MIMAT0000090	NM_024893	C20orf39	chromosome 20 open reading frame 39	0	0	1	0	0	0	1	1	0	1	1
hsa-miR-32	MIMAT0000090	NM_016231	NLK	nemo-like kinase	0	0	0	1	0	0	1	1	0	1	1
hsa-miR-32	MIMAT0000090	NM_016270	KLF2	Kruppel-like factor 2 (lung)	0	0	0	1	0	0	1	1	0	1	1
hsa-miR-32	MIMAT0000090	NM_016272	TOB2	transducer of ERBB2, 2	0	0	1	1	0	0	0	1	0	1	1
hsa-miR-32	MIMAT0000090	NM_016322	RAB14	RAB14, member RAS oncogene family	0	0	1	0	0	0	1	1	0	1	1
hsa-miR-32	MIMAT0000090	NM_016463	CXXC5	CXXC finger 5	0	0	1	0	0	0	1	1	0	1	1
hsa-miR-32	MIMAT0000090	NM_016516	VPS54	vacuolar protein sorting 54 homolog (S. cerevisiae)	0	0	1	1	0	0	1	1	0	1	0
hsa-miR-32	MIMAT0000090	NM_015646	RAP1B	RAP1B, member of RAS oncogene family	0	0	1	1	0	0	1	1	0	1	0
hsa-miR-32	MIMAT0000090	NM_015630	EPC2	enhancer of polycomb homolog 2 (Drosophila)	0	0	1	0	0	0	1	1	0	1	1
hsa-miR-32	MIMAT0000090	NM_015288	PHF15	PHD finger protein 15	0	0	1	0	0	0	1	1	0	1	1
hsa-miR-32	MIMAT0000090	NM_015296	DOCK9	dedicator of cytokinesis 9	0	0	0	1	0	0	1	1	0	1	1
hsa-miR-32	MIMAT0000090	NM_015308	FNBP4	formin binding protein 4	0	0	1	0	0	0	1	1	0	1	1
hsa-miR-32	MIMAT0000090	NM_030791	SGPP1	sphingosine-1-phosphate phosphatase 1	0	0	1	1	0	0	1	1	0	0	1
hsa-miR-32	MIMAT0000090	NM_030667	PTPRO	protein tyrosine phosphatase, receptor type, O	0	0	1	1	0	0	1	1	0	1	0
hsa-miR-32	MIMAT0000090	NM_015554	GLCE	glucuronic acid epimerase	0	0	1	0	0	0	1	1	0	1	1
hsa-miR-32	MIMAT0000090	NM_025191	EDEM3	ER degradation enhancer, mannosidase alpha-like 3	0	0	1	0	0	0	1	1	0	1	1
hsa-miR-32	MIMAT0000090	NM_015576	ERC2	ELKS/RAB6-interacting/CAST family member 2	0	0	1	0	0	0	1	1	0	1	1
hsa-miR-32	MIMAT0000090	NM_013233	STK39	serine threonine kinase 39 (STE20/SPS1 homolog, yeast)	0	0	1	1	0	0	0	1	0	1	1
hsa-miR-32	MIMAT0000090	NM_002848	PTPRO	protein tyrosine phosphatase, receptor type, O	0	0	1	1	0	0	1	1	0	1	0
hsa-miR-32	MIMAT0000090	NM_003244	TGIF1	TGFB-induced factor homeobox 1	0	0	1	1	0	0	1	1	0	0	1
hsa-miR-32	MIMAT0000090	NM_003206	TCF21	transcription factor 21	0	0	1	1	0	0	1	1	0	1	0
hsa-miR-32	MIMAT0000090	NM_003108	SOX11	SRY (sex determining region Y)-box 11	0	0	1	1	0	0	0	1	0	1	1
hsa-miR-32	MIMAT0000090	NM_001013438	FXR1	fragile X mental retardation, autosomal homolog 1	0	0	1	1	0	0	0	1	0	1	1
hsa-miR-32	MIMAT0000090	NM_175612	CNTN4	contactin 4	0	0	1	1	0	0	1	1	0	1	0
hsa-miR-32	MIMAT0000090	NM_175863	ARID1B	AT rich interactive domain 1B (SWI1-like)	0	0	1	1	0	0	1	1	0	1	0
hsa-miR-32	MIMAT0000090	NM_002998	SDC2	syndecan 2	0	0	1	0	0	0	1	1	0	1	1
hsa-miR-32	MIMAT0000090	NM_002942	ROBO2	roundabout, axon guidance receptor, homolog 2 (Drosophila)	0	0	1	1	0	0	0	1	0	1	1
hsa-miR-32	MIMAT0000090	NM_002918	RFX1	regulatory factor X, 1 (influences HLA class II expression)	0	0	1	0	0	0	1	1	0	1	1
hsa-miR-32	MIMAT0000090	NM_001017977	IQWD1	IQ motif and WD repeats 1	0	0	1	1	0	0	0	1	0	1	1
hsa-miR-32	MIMAT0000090	NM_198182	GRHL1	grainyhead-like 1 (Drosophila)	0	0	1	1	0	0	1	1	0	1	0
hsa-miR-32	MIMAT0000090	NM_199424	WWP2	WW domain containing E3 ubiquitin protein ligase 2	0	0	1	1	0	0	1	1	0	1	0
hsa-miR-32	MIMAT0000090	NM_001010942	RAP1B	RAP1B, member of RAS oncogene family	0	0	1	1	0	0	0	1	0	1	1
hsa-miR-32	MIMAT0000090	NM_003300	TRAF3	TNF receptor-associated factor 3	0	0	0	1	0	0	1	1	0	1	1
hsa-miR-32	MIMAT0000090	NM_003783	B3GALT2	UDP-Gal:betaGlcNAc beta 1,3-galactosyltransferase, polypeptide 2	0	0	1	0	0	0	1	1	0	1	1
hsa-miR-32	MIMAT0000090	NM_003629	PIK3R3	phosphoinositide-3-kinase, regulatory subunit 3 (gamma)	0	0	1	0	0	0	1	1	0	1	1
hsa-miR-32	MIMAT0000090	NM_201557	FHL2	four and a half LIM domains 2	0	0	1	1	0	0	1	1	0	1	0
hsa-miR-32	MIMAT0000090	NM_001004317	LIN28B	lin-28 homolog B (C. elegans)	0	0	1	1	0	0	0	1	0	1	1
hsa-miR-32	MIMAT0000090	NM_003489	NRIP1	nuclear receptor interacting protein 1	0	0	1	0	0	0	1	1	0	1	1
hsa-miR-32	MIMAT0000090	NM_201555	FHL2	four and a half LIM domains 2	0	0	1	1	0	0	1	1	0	1	0
hsa-miR-32	MIMAT0000090	NM_003483	HMGA2	high mobility group AT-hook 2	0	0	1	0	0	0	1	1	0	1	1
hsa-miR-32	MIMAT0000090	NM_001005739	VPS54	vacuolar protein sorting 54 homolog (S. cerevisiae)	0	0	0	1	0	0	1	1	0	1	1
hsa-miR-32	MIMAT0000090	NM_003342	UBE2G1	ubiquitin-conjugating enzyme E2G 1 (UBC7 homolog, yeast)	0	0	1	0	0	0	1	1	0	1	1
hsa-miR-32	MIMAT0000090	NM_001007466	TULP4	tubby like protein 4	0	0	1	1	0	0	0	1	0	1	1
hsa-miR-32	MIMAT0000090	NM_001008738	FNIP1	folliculin interacting protein 1	0	0	1	1	0	0	0	1	0	1	1
hsa-miR-32	MIMAT0000090	NM_002522	NPTX1	neuronal pentraxin I	0	0	1	0	0	0	1	1	0	1	1
hsa-miR-32	MIMAT0000090	NM_002515	NOVA1	neuro-oncological ventral antigen 1	0	0	0	1	0	0	1	1	0	1	1
hsa-miR-32	MIMAT0000090	NM_178585	WDFY3	WD repeat and FYVE domain containing 3	0	0	1	1	0	0	1	1	0	1	0
hsa-miR-32	MIMAT0000090	NM_194328	RNF38	ring finger protein 38	0	0	1	1	0	0	1	1	0	1	0
hsa-miR-32	MIMAT0000090	NM_001681	ATP2A2	ATPase, Ca++ transporting, cardiac muscle, slow twitch 2	0	0	1	1	0	0	1	1	0	1	0
hsa-miR-32	MIMAT0000090	NM_194282	LIN54	lin-54 homolog (C. elegans)	0	0	1	0	0	0	1	1	0	1	1
hsa-miR-32	MIMAT0000090	NM_001450	FHL2	four and a half LIM domains 2	0	0	1	1	0	0	1	1	0	1	0
hsa-miR-32	MIMAT0000090	NM_001438	ESRRG	estrogen-related receptor gamma	0	0	1	0	0	0	1	1	0	1	1
hsa-miR-32	MIMAT0000090	NM_182485	CPEB2	cytoplasmic polyadenylation element binding protein 2	0	0	1	0	0	0	1	1	0	1	1
hsa-miR-32	MIMAT0000090	NM_001259	CDK6	cyclin-dependent kinase 6	0	0	1	0	0	0	1	1	0	1	1
hsa-miR-32	MIMAT0000090	NM_001077447	PPCS	phosphopantothenoylcysteine synthetase	0	0	1	1	0	0	0	1	0	1	1
hsa-miR-32	MIMAT0000090	NM_001186	BACH1	BTB and CNC homology 1, basic leucine zipper transcription factor 1	0	0	1	0	0	0	1	1	0	1	1
hsa-miR-32	MIMAT0000090	NM_000076	CDKN1C	cyclin-dependent kinase inhibitor 1C (p57, Kip2)	0	0	1	1	0	0	1	1	0	0	1
hsa-miR-32	MIMAT0000090	NM_001110	ADAM10	ADAM metallopeptidase domain 10	0	0	1	0	0	0	1	1	0	1	1
hsa-miR-32	MIMAT0000090	NM_194329	RNF38	ring finger protein 38	0	0	1	1	0	0	1	1	0	1	0
hsa-miR-32	MIMAT0000090	NM_001039492	FHL2	four and a half LIM domains 2	0	0	1	1	0	0	0	1	0	1	1
hsa-miR-32	MIMAT0000090	NM_181459	PAX3	paired box 3	0	0	1	0	0	0	1	1	0	1	1
hsa-miR-32	MIMAT0000090	NM_198124	CSMD3	CUB and Sushi multiple domains 3	0	0	1	1	0	0	1	1	0	1	0
hsa-miR-32	MIMAT0000090	NM_198123	CSMD3	CUB and Sushi multiple domains 3	0	0	1	1	0	0	1	1	0	1	0
hsa-miR-32	MIMAT0000090	NM_002239	KCNJ3	potassium inwardly-rectifying channel, subfamily J, member 3	0	0	1	0	0	0	1	1	0	1	1
hsa-miR-32	MIMAT0000090	NM_181077	GOLGA8A	golgi autoantigen, golgin subfamily a, 8A	0	0	1	1	0	0	0	1	0	1	1
hsa-miR-32	MIMAT0000090	NM_002210	ITGAV	integrin, alpha V (vitronectin receptor, alpha polypeptide, antigen CD51)	0	0	0	1	0	0	1	1	0	1	1
hsa-miR-32	MIMAT0000090	NM_002158	FOXN2	forkhead box N2	0	0	1	0	0	0	1	1	0	1	1
hsa-miR-32	MIMAT0000090	NM_002136	HNRNPA1	heterogeneous nuclear ribonucleoprotein A1	0	0	1	0	0	0	1	1	0	1	1
hsa-miR-32	MIMAT0000090	NM_194332	RNF38	ring finger protein 38	0	0	1	1	0	0	1	1	0	1	0
hsa-miR-32	MIMAT0000090	NM_002061	GCLM	glutamate-cysteine ligase, modifier subunit	0	0	1	0	0	0	1	1	0	1	1
hsa-miR-32	MIMAT0000090	NM_002045	GAP43	growth associated protein 43	0	0	0	1	0	0	1	1	0	1	1
hsa-miR-32	MIMAT0000090	NM_001949	E2F3	E2F transcription factor 3	0	0	1	0	0	0	1	1	0	1	1
hsa-miR-32	MIMAT0000090	NM_001080517	SETD5	SET domain containing 5	0	0	1	1	0	0	0	1	0	1	1
hsa-miR-32	MIMAT0000090	NM_203403	C9orf150	chromosome 9 open reading frame 150	0	0	0	1	0	0	1	1	0	1	1
hsa-miR-32	MIMAT0000090	NM_005249	FOXG1	forkhead box G1	0	0	1	0	0	0	1	1	0	1	1
hsa-miR-32	MIMAT0000090	NM_000314	PTEN	phosphatase and tensin homolog (mutated in multiple advanced cancers 1)	0	0	1	1	0	0	0	1	0	1	1
hsa-miR-32	MIMAT0000090	NM_206860	TACC2	transforming, acidic coiled-coil containing protein 2	0	0	1	1	0	0	1	1	0	1	0
hsa-miR-32	MIMAT0000090	NM_004521	KIF5B	kinesin family member 5B	0	0	0	1	0	0	1	1	0	1	1
hsa-miR-32	MIMAT0000090	NM_000332	ATXN1	ataxin 1	0	0	1	0	0	0	1	1	0	1	1
hsa-miR-32	MIMAT0000090	NM_000399	EGR2	early growth response 2 (Krox-20 homolog, Drosophila)	0	0	1	0	0	0	1	1	0	1	1
hsa-miR-32	MIMAT0000090	NM_206854	QKI	quaking homolog, KH domain RNA binding (mouse)	0	0	1	0	0	0	1	1	0	1	1
hsa-miR-32	MIMAT0000090	NM_000458	HNF1B	HNF1 homeobox B	0	0	1	1	0	0	1	1	0	1	0
hsa-miR-32	MIMAT0000090	NM_003722	TP63	tumor protein p63	0	0	1	0	0	0	1	1	0	1	1
hsa-miR-32	MIMAT0000090	NM_004419	DUSP5	dual specificity phosphatase 5	0	0	1	0	0	0	1	1	0	1	1
hsa-miR-32	MIMAT0000090	NM_004393	DAG1	dystroglycan 1 (dystrophin-associated glycoprotein 1)	0	0	1	0	0	0	1	1	0	1	1
hsa-miR-32	MIMAT0000090	NM_004379	CREB1	cAMP responsive element binding protein 1	0	0	1	0	0	0	1	1	0	1	1
hsa-miR-32	MIMAT0000090	NM_004370	COL12A1	collagen, type XII, alpha 1	0	0	0	1	0	0	1	1	0	1	1
hsa-miR-32	MIMAT0000090	NM_183376	ARRDC4	arrestin domain containing 4	0	0	1	0	0	0	1	1	0	1	1
hsa-miR-32	MIMAT0000090	NM_000259	MYO5A	myosin VA (heavy chain 12, myoxin)	0	0	1	1	0	0	0	1	0	1	1
hsa-miR-32	MIMAT0000090	NM_005187	CBFA2T3	core-binding factor, runt domain, alpha subunit 2; translocated to, 3	0	0	1	0	0	0	1	1	0	1	1
hsa-miR-32	MIMAT0000090	NM_145285	NKX2-3	NK2 transcription factor related, locus 3 (Drosophila)	0	0	1	1	0	0	0	1	0	1	1
hsa-miR-32	MIMAT0000090	NM_145725	TRAF3	TNF receptor-associated factor 3	0	0	1	1	0	0	1	1	0	1	0
hsa-miR-32	MIMAT0000090	NM_145726	TRAF3	TNF receptor-associated factor 3	0	0	1	1	0	0	1	1	0	1	0
hsa-miR-32	MIMAT0000090	NM_005069	SIM2	single-minded homolog 2 (Drosophila)	0	0	1	0	0	0	1	1	0	1	1
hsa-miR-32	MIMAT0000090	NM_004949	DSC2	desmocollin 2	0	0	1	1	0	0	1	1	0	1	0
hsa-miR-32	MIMAT0000090	NM_207344	SPRYD4	SPRY domain containing 4	0	0	0	1	0	0	1	1	0	1	1
hsa-miR-32	MIMAT0000090	NM_152272	CHMP7	CHMP family, member 7	0	0	1	0	0	0	1	1	0	1	1
hsa-miR-32	MIMAT0000090	NM_004821	HAND1	heart and neural crest derivatives expressed 1	0	0	0	1	0	0	1	1	0	1	1
hsa-miR-32	MIMAT0000090	NM_152309	PIK3AP1	phosphoinositide-3-kinase adaptor protein 1	0	0	1	1	0	0	1	1	0	1	0
hsa-miR-32	MIMAT0000090	NM_004667	HERC2	hect domain and RLD 2	0	0	1	0	0	0	1	1	0	1	1
hsa-miR-32	MIMAT0000090	NM_206862	TACC2	transforming, acidic coiled-coil containing protein 2	0	0	1	1	0	0	1	1	0	1	0
hsa-miR-32	MIMAT0000090	NM_000555	DCX	doublecortex; lissencephaly, X-linked (doublecortin)	0	0	1	0	0	0	1	1	0	1	1
hsa-miR-32	MIMAT0000090	NM_203504	G3BP2	GTPase activating protein (SH3 domain) binding protein 2	0	0	1	1	0	0	1	1	0	1	0
hsa-miR-32	MIMAT0000090	NM_001001521	UGP2	UDP-glucose pyrophosphorylase 2	0	0	0	1	0	0	1	1	0	1	1
hsa-miR-32	MIMAT0000090	NM_004036	ADCY3	adenylate cyclase 3	0	0	0	1	0	0	1	1	0	1	1
hsa-miR-32	MIMAT0000090	NM_001001481	UBE2W	ubiquitin-conjugating enzyme E2W (putative)	0	0	1	1	0	0	1	1	0	0	1
hsa-miR-32	MIMAT0000090	NM_000958	PTGER4	prostaglandin E receptor 4 (subtype EP4)	0	0	0	1	0	0	1	1	0	1	1
hsa-miR-32	MIMAT0000090	NM_004225	MFHAS1	malignant fibrous histiocytoma amplified sequence 1	0	0	1	1	0	0	0	1	0	1	1
hsa-miR-32	MIMAT0000090	NM_000719	CACNA1C	calcium channel, voltage-dependent, L type, alpha 1C subunit	0	0	1	0	0	0	1	1	0	1	1
hsa-miR-32	MIMAT0000090	NM_000639	FASLG	Fas ligand (TNF superfamily, member 6)	0	0	1	0	0	0	1	1	0	1	1
hsa-miR-32	MIMAT0000090	NM_001003406	CACNA1I	calcium channel, voltage-dependent, T type, alpha 1I subunit	0	0	1	1	0	0	0	1	0	1	1
hsa-miR-32	MIMAT0000090	NM_152753	SCUBE3	signal peptide, CUB domain, EGF-like 3	0	0	1	0	0	0	1	1	0	1	1
hsa-miR-32	MIMAT0000090	NM_003884	PCAF	p300/CBP-associated factor	0	0	0	1	0	0	1	1	0	1	1
hsa-miR-32	MIMAT0000090	NM_203505	G3BP2	GTPase activating protein (SH3 domain) binding protein 2	0	0	1	1	0	0	1	1	0	1	0
hsa-miR-32	MIMAT0000090	NM_021183	RAP2C	RAP2C, member of RAS oncogene family	0	0	0	0	0	0	1	1	0	1	1
hsa-miR-32	MIMAT0000090	NM_182772	CREM	cAMP responsive element modulator	0	0	1	0	0	0	1	1	0	1	0
hsa-miR-32	MIMAT0000090	NM_194071	CREB3L2	cAMP responsive element binding protein 3-like 2	0	0	1	0	0	0	0	1	0	1	1
hsa-miR-32	MIMAT0000090	NM_024779	PIP4K2C	phosphatidylinositol-5-phosphate 4-kinase, type II, gamma	0	0	0	0	0	0	1	1	0	1	1
hsa-miR-32	MIMAT0000090	NM_203329	CD59	CD59 molecule, complement regulatory protein	0	0	1	1	0	0	0	1	0	1	0
hsa-miR-32	MIMAT0000090	NM_182771	CREM	cAMP responsive element modulator	0	0	1	0	0	0	1	1	0	1	0
hsa-miR-32	MIMAT0000090	NM_207363	NAP5	Nck-associated protein 5	0	0	1	0	0	0	0	1	0	1	1
hsa-miR-32	MIMAT0000090	NM_203301	FBXO33	F-box protein 33	0	0	0	0	0	0	1	1	0	1	1
hsa-miR-32	MIMAT0000090	NM_194272	RBPMS2	RNA binding protein with multiple splicing 2	0	0	1	1	0	0	0	1	0	0	1
hsa-miR-32	MIMAT0000090	NM_203406	LOC153364	similar to metallo-beta-lactamase superfamily protein	0	0	1	1	0	0	0	1	0	1	0
hsa-miR-32	MIMAT0000090	NM_022465	IKZF4	IKAROS family zinc finger 4 (Eos)	0	0	1	0	0	0	0	1	0	1	1
hsa-miR-32	MIMAT0000090	NM_212469	CHKA	choline kinase alpha	0	0	1	1	0	0	0	1	0	1	0
hsa-miR-32	MIMAT0000090	NM_183227	RAB23	RAB23, member RAS oncogene family	0	0	0	1	0	0	1	1	0	1	0
hsa-miR-32	MIMAT0000090	NM_182850	CREM	cAMP responsive element modulator	0	0	1	0	0	0	1	1	0	1	0
hsa-miR-32	MIMAT0000090	NM_182853	CREM	cAMP responsive element modulator	0	0	1	0	0	0	1	1	0	1	0
hsa-miR-32	MIMAT0000090	NM_182931	MLL5	myeloid/lymphoid or mixed-lineage leukemia 5 (trithorax homolog, Drosophila)	0	0	1	0	0	0	1	1	0	1	0
hsa-miR-32	MIMAT0000090	NM_022483	C5orf28	chromosome 5 open reading frame 28	0	0	1	1	0	0	0	1	0	1	0
hsa-miR-32	MIMAT0000090	NM_183011	CREM	cAMP responsive element modulator	0	0	1	0	0	0	1	1	0	1	0
hsa-miR-32	MIMAT0000090	NM_183012	CREM	cAMP responsive element modulator	0	0	1	0	0	0	1	1	0	1	0
hsa-miR-32	MIMAT0000090	NM_183060	CREM	cAMP responsive element modulator	0	0	1	0	0	0	1	1	0	1	0
hsa-miR-32	MIMAT0000090	NM_025154	UNC84A	unc-84 homolog A (C. elegans)	0	0	1	1	0	0	0	1	0	1	0
hsa-miR-32	MIMAT0000090	NM_025010	KLHL18	kelch-like 18 (Drosophila)	0	0	1	0	0	0	0	1	0	1	1
hsa-miR-32	MIMAT0000090	NM_032859	ABHD13	abhydrolase domain containing 13	0	0	0	0	0	0	1	1	0	1	1
hsa-miR-32	MIMAT0000090	NM_203330	CD59	CD59 molecule, complement regulatory protein	0	0	1	1	0	0	0	1	0	1	0
hsa-miR-32	MIMAT0000090	NM_030660	ATXN3	ataxin 3	0	0	0	1	0	0	1	1	0	1	0
hsa-miR-32	MIMAT0000090	NM_203446	SYNJ1	synaptojanin 1	0	0	1	1	0	0	0	1	0	1	0
hsa-miR-32	MIMAT0000090	NM_024747	HPS6	Hermansky-Pudlak syndrome 6	0	0	0	0	0	0	1	1	0	1	1
hsa-miR-32	MIMAT0000090	NM_206853	QKI	quaking homolog, KH domain RNA binding (mouse)	0	0	1	0	0	0	1	1	0	1	0
hsa-miR-32	MIMAT0000090	NM_198159	MITF	microphthalmia-associated transcription factor	0	0	1	0	0	0	1	1	0	1	0
hsa-miR-32	MIMAT0000090	NM_021914	CFL2	cofilin 2 (muscle)	0	0	0	0	0	0	1	1	0	1	1
hsa-miR-32	MIMAT0000090	NM_024345	WDR32	WD repeat domain 32	0	0	1	1	0	0	0	1	0	1	0
hsa-miR-32	MIMAT0000090	NM_198551	MIA3	melanoma inhibitory activity family, member 3	0	0	1	1	0	0	0	1	0	1	0
hsa-miR-32	MIMAT0000090	NM_203331	CD59	CD59 molecule, complement regulatory protein	0	0	1	1	0	0	0	1	0	1	0
hsa-miR-32	MIMAT0000090	NM_198336	INSIG1	insulin induced gene 1	0	0	0	1	0	0	1	1	0	1	0
hsa-miR-32	MIMAT0000090	NM_023079	UBE2Z	ubiquitin-conjugating enzyme E2Z	0	0	0	0	0	0	1	1	0	1	1
hsa-miR-32	MIMAT0000090	NM_024016	HOXB8	homeobox B8	0	0	1	1	0	0	0	1	0	0	1
hsa-miR-32	MIMAT0000090	NM_021998	ZNF711	zinc finger protein 711	0	0	1	0	0	0	0	1	0	1	1
hsa-miR-32	MIMAT0000090	NM_023914	P2RY13	purinergic receptor P2Y, G-protein coupled, 13	0	0	1	0	0	0	1	1	0	0	1
hsa-miR-32	MIMAT0000090	NM_021815	SLC5A7	solute carrier family 5 (choline transporter), member 7	0	0	1	1	0	0	0	1	0	1	0
hsa-miR-32	MIMAT0000090	NM_198158	MITF	microphthalmia-associated transcription factor	0	0	1	0	0	0	1	1	0	1	0
hsa-miR-32	MIMAT0000090	NM_024567	HMBOX1	homeobox containing 1	0	0	0	0	0	0	1	1	0	1	1
hsa-miR-32	MIMAT0000090	NM_194330	RNF38	ring finger protein 38	0	0	0	1	0	0	1	1	0	1	0
hsa-miR-32	MIMAT0000090	NM_022338	C11orf24	chromosome 11 open reading frame 24	0	0	0	0	0	0	1	1	0	1	1
hsa-miR-32	MIMAT0000090	NM_206866	BACH1	BTB and CNC homology 1, basic leucine zipper transcription factor 1	0	0	1	0	0	0	1	1	0	1	0
hsa-miR-32	MIMAT0000090	NM_024721	ZFHX4	zinc finger homeobox 4	0	0	1	0	0	0	0	1	0	1	1
hsa-miR-32	MIMAT0000090	NM_199462	RIPK5	receptor interacting protein kinase 5	0	0	1	1	0	0	0	1	0	1	0
hsa-miR-32	MIMAT0000090	NM_022831	AIDA	axin interactor, dorsalization associated	0	0	1	1	0	0	0	1	0	1	0
hsa-miR-32	MIMAT0000090	NM_206861	TACC2	transforming, acidic coiled-coil containing protein 2	0	0	1	1	0	0	1	1	0	0	0
hsa-miR-32	MIMAT0000090	NM_024674	LIN28	lin-28 homolog (C. elegans)	0	0	0	0	0	0	1	1	0	1	1
hsa-miR-32	MIMAT0000090	NM_022898	BCL11B	B-cell CLL/lymphoma 11B (zinc finger protein)	0	0	1	1	0	0	0	1	0	1	0
hsa-miR-32	MIMAT0000090	NM_198080	MSRB3	methionine sulfoxide reductase B3	0	0	1	1	0	0	0	1	0	1	0
hsa-miR-32	MIMAT0000090	NM_022143	LRRC4	leucine rich repeat containing 4	0	0	0	0	0	0	1	1	0	1	1
hsa-miR-32	MIMAT0000090	NM_206594	ESRRG	estrogen-related receptor gamma	0	0	1	0	0	0	1	1	0	1	0
hsa-miR-32	MIMAT0000090	NM_138799	MBOAT2	membrane bound O-acyltransferase domain containing 2	0	0	0	0	0	0	1	1	0	1	1
hsa-miR-32	MIMAT0000090	NM_080747	KRT72	keratin 72	0	0	0	0	0	0	1	1	0	1	1
hsa-miR-32	MIMAT0000090	NM_173198	NR4A3	nuclear receptor subfamily 4, group A, member 3	0	0	1	0	0	0	1	1	0	1	0
hsa-miR-32	MIMAT0000090	NM_172226	CAMKK2	calcium/calmodulin-dependent protein kinase kinase 2, beta	0	0	1	0	0	0	1	1	0	1	0
hsa-miR-32	MIMAT0000090	NM_172216	CAMKK2	calcium/calmodulin-dependent protein kinase kinase 2, beta	0	0	1	0	0	0	1	1	0	1	0
hsa-miR-32	MIMAT0000090	NM_170709	SGK3	serum/glucocorticoid regulated kinase family, member 3	0	0	1	1	0	0	0	1	0	1	0
hsa-miR-32	MIMAT0000090	NM_153634	CPNE8	copine VIII	0	0	0	0	0	0	1	1	0	1	1
hsa-miR-32	MIMAT0000090	NM_130807	MOBKL2A	MOB1, Mps One Binder kinase activator-like 2A (yeast)	0	0	1	1	0	0	0	1	0	1	0
hsa-miR-32	MIMAT0000090	NM_153500	CAMKK2	calcium/calmodulin-dependent protein kinase kinase 2, beta	0	0	1	0	0	0	1	1	0	1	0
hsa-miR-32	MIMAT0000090	NM_133372	FNIP1	folliculin interacting protein 1	0	0	1	1	0	0	0	1	0	1	0
hsa-miR-32	MIMAT0000090	NM_173207	TGIF1	TGFB-induced factor homeobox 1	0	0	1	1	0	0	1	1	0	0	0
hsa-miR-32	MIMAT0000090	NM_080630	COL11A1	collagen, type XI, alpha 1	0	0	1	1	0	0	0	1	0	1	0
hsa-miR-32	MIMAT0000090	NM_173208	TGIF1	TGFB-induced factor homeobox 1	0	0	1	1	0	0	1	1	0	0	0
hsa-miR-32	MIMAT0000090	NM_173614	NOMO2	NODAL modulator 2	0	0	1	0	0	0	1	1	0	0	1
hsa-miR-32	MIMAT0000090	NM_058166	TRIM6	tripartite motif-containing 6	0	0	1	1	0	0	0	1	0	1	0
hsa-miR-32	MIMAT0000090	NM_173598	KSR2	kinase suppressor of ras 2	0	0	0	1	0	0	0	1	0	1	1
hsa-miR-32	MIMAT0000090	NM_173354	SNF1LK	SNF1-like kinase	0	0	0	1	0	0	0	1	0	1	1
hsa-miR-32	MIMAT0000090	NM_173214	NFAT5	nuclear factor of activated T-cells 5, tonicity-responsive	0	0	1	0	0	0	1	1	0	1	0
hsa-miR-32	MIMAT0000090	NM_173211	TGIF1	TGFB-induced factor homeobox 1	0	0	1	1	0	0	1	1	0	0	0
hsa-miR-32	MIMAT0000090	NM_138317	KCNK10	potassium channel, subfamily K, member 10	0	0	1	0	0	0	1	1	0	1	0
hsa-miR-32	MIMAT0000090	NM_173210	TGIF1	TGFB-induced factor homeobox 1	0	0	1	1	0	0	1	1	0	0	0
hsa-miR-32	MIMAT0000090	NM_173209	TGIF1	TGFB-induced factor homeobox 1	0	0	1	1	0	0	1	1	0	0	0
hsa-miR-32	MIMAT0000090	NM_133433	NIPBL	Nipped-B homolog (Drosophila)	0	0	0	0	0	0	1	1	0	1	1
hsa-miR-32	MIMAT0000090	NM_153499	CAMKK2	calcium/calmodulin-dependent protein kinase kinase 2, beta	0	0	1	0	0	0	1	1	0	1	0
hsa-miR-32	MIMAT0000090	NM_152622	MIER3	mesoderm induction early response 1, family member 3	0	0	1	0	0	0	0	1	0	1	1
hsa-miR-32	MIMAT0000090	NM_152527	SLC16A14	solute carrier family 16, member 14 (monocarboxylic acid transporter 14)	0	0	1	1	0	0	0	1	0	1	0
hsa-miR-32	MIMAT0000090	NM_138713	NFAT5	nuclear factor of activated T-cells 5, tonicity-responsive	0	0	1	0	0	0	1	1	0	1	0
hsa-miR-32	MIMAT0000090	NM_138714	NFAT5	nuclear factor of activated T-cells 5, tonicity-responsive	0	0	1	0	0	0	1	1	0	1	0
hsa-miR-32	MIMAT0000090	NM_138782	FCHO2	FCH domain only 2	0	0	1	1	0	0	0	1	0	0	1
hsa-miR-32	MIMAT0000090	NM_152405	JMY	junction-mediating and regulatory protein	0	0	1	1	0	0	0	1	0	1	0
hsa-miR-32	MIMAT0000090	NM_138970	NRXN3	neurexin 3	0	0	1	1	0	0	0	1	0	1	0
hsa-miR-32	MIMAT0000090	NM_144664	FAM76B	family with sequence similarity 76, member B	0	0	0	0	0	0	1	1	0	1	1
hsa-miR-32	MIMAT0000090	NM_144729	DUSP10	dual specificity phosphatase 10	0	0	0	1	0	0	1	1	0	1	0
hsa-miR-32	MIMAT0000090	NM_138621	BCL2L11	BCL2-like 11 (apoptosis facilitator)	0	0	1	0	0	0	1	1	0	1	0
hsa-miR-32	MIMAT0000090	NM_152665	TCTEX1D1	Tctex1 domain containing 1	0	0	1	1	0	0	0	1	0	1	0
hsa-miR-32	MIMAT0000090	NM_138473	SP1	Sp1 transcription factor	0	0	0	0	0	0	1	1	0	1	1
hsa-miR-32	MIMAT0000090	NM_152999	STEAP2	six transmembrane epithelial antigen of the prostate 2	0	0	1	1	0	0	0	1	0	1	0
hsa-miR-32	MIMAT0000090	NM_134427	RGS3	regulator of G-protein signaling 3	0	0	1	1	0	0	1	1	0	0	0
hsa-miR-32	MIMAT0000090	NM_134442	CREB1	cAMP responsive element binding protein 1	0	0	1	0	0	0	1	1	0	1	0
hsa-miR-32	MIMAT0000090	NM_152739	HOXA9	homeobox A9	0	0	0	0	0	0	1	1	0	1	1
hsa-miR-32	MIMAT0000090	NM_138324	PCSK6	proprotein convertase subtilisin/kexin type 6	0	0	1	1	0	0	0	1	0	1	0
hsa-miR-32	MIMAT0000090	NM_138335	GNPDA2	glucosamine-6-phosphate deaminase 2	0	0	0	0	0	0	1	1	0	1	1
hsa-miR-32	MIMAT0000090	NM_138370	LOC91461	hypothetical protein BC007901	0	0	1	1	0	0	0	1	0	0	1
hsa-miR-32	MIMAT0000090	NM_152723	CCDC89	coiled-coil domain containing 89	0	0	1	1	0	0	0	1	0	1	0
hsa-miR-32	MIMAT0000090	NM_152707	SLC25A16	solute carrier family 25 (mitochondrial carrier; Graves disease autoantigen), member 16	0	0	1	1	0	0	0	1	0	1	0
hsa-miR-32	MIMAT0000090	NM_145011	ZNF25	zinc finger protein 25	0	0	1	1	0	0	0	1	0	1	0
hsa-miR-32	MIMAT0000090	NM_057749	CCNE2	cyclin E2	0	0	1	0	0	0	1	1	0	1	0
hsa-miR-32	MIMAT0000090	NM_182770	CREM	cAMP responsive element modulator	0	0	1	0	0	0	1	1	0	1	0
hsa-miR-32	MIMAT0000090	NM_032295	SLC37A3	solute carrier family 37 (glycerol-3-phosphate transporter), member 3	0	0	1	1	0	0	0	1	0	1	0
hsa-miR-32	MIMAT0000090	NM_182646	CPEB2	cytoplasmic polyadenylation element binding protein 2	0	0	1	0	0	0	1	1	0	1	0
hsa-miR-32	MIMAT0000090	NM_182502	TMPRSS11B	transmembrane protease, serine 11B	0	0	1	1	0	0	0	1	0	1	0
hsa-miR-32	MIMAT0000090	NM_032312	YIPF4	Yip1 domain family, member 4	0	0	0	1	0	0	1	1	0	0	1
hsa-miR-32	MIMAT0000090	NM_181874	GRM7	glutamate receptor, metabotropic 7	0	0	0	0	0	0	1	1	0	1	1
hsa-miR-32	MIMAT0000090	NM_181645	CCDC67	coiled-coil domain containing 67	0	0	1	1	0	0	0	1	0	1	0
hsa-miR-32	MIMAT0000090	NM_181483	C18orf1	chromosome 18 open reading frame 1	0	0	1	0	0	0	1	1	0	1	0
hsa-miR-32	MIMAT0000090	NM_181482	C18orf1	chromosome 18 open reading frame 1	0	0	1	0	0	0	1	1	0	1	0
hsa-miR-32	MIMAT0000090	NM_181481	C18orf1	chromosome 18 open reading frame 1	0	0	1	0	0	0	1	1	0	1	0
hsa-miR-32	MIMAT0000090	NM_182717	CREM	cAMP responsive element modulator	0	0	0	0	0	0	1	1	0	1	1
hsa-miR-32	MIMAT0000090	NM_032127	FAM160A2	family with sequence similarity 160, member A2	0	0	0	0	0	0	1	1	0	1	1
hsa-miR-32	MIMAT0000090	NM_032037	TSSK6	testis-specific serine kinase 6	0	0	0	0	0	0	1	1	0	1	1
hsa-miR-32	MIMAT0000090	NM_030668	PTPRO	protein tyrosine phosphatase, receptor type, O	0	0	0	1	0	0	1	1	0	1	0
hsa-miR-32	MIMAT0000090	NM_030669	PTPRO	protein tyrosine phosphatase, receptor type, O	0	0	0	1	0	0	1	1	0	1	0
hsa-miR-32	MIMAT0000090	NM_182769	CREM	cAMP responsive element modulator	0	0	1	0	0	0	1	1	0	1	0
hsa-miR-32	MIMAT0000090	NM_182763	MCL1	myeloid cell leukemia sequence 1 (BCL2-related)	0	0	1	0	0	0	1	0	0	1	1
hsa-miR-32	MIMAT0000090	NM_182722	CREM	cAMP responsive element modulator	0	0	1	0	0	0	1	1	0	1	0
hsa-miR-32	MIMAT0000090	NM_030920	ANP32E	acidic (leucine-rich) nuclear phosphoprotein 32 family, member E	0	0	0	1	0	0	0	1	0	1	1
hsa-miR-32	MIMAT0000090	NM_031291	SLC25A31	solute carrier family 25 (mitochondrial carrier; adenine nucleotide translocator), member 31	0	0	0	0	0	0	1	1	0	1	1
hsa-miR-32	MIMAT0000090	NM_182720	CREM	cAMP responsive element modulator	0	0	1	0	0	0	1	1	0	1	0
hsa-miR-32	MIMAT0000090	NM_031418	TMEM16C	transmembrane protein 16C	0	0	1	1	0	0	0	1	0	1	0
hsa-miR-32	MIMAT0000090	NM_032505	KBTBD8	kelch repeat and BTB (POZ) domain containing 8	0	0	1	1	0	0	0	1	0	1	0
hsa-miR-32	MIMAT0000090	NM_181460	PAX3	paired box 3	0	0	1	0	0	0	1	1	0	1	0
hsa-miR-32	MIMAT0000090	NM_176877	INADL	InaD-like (Drosophila)	0	0	1	1	0	0	0	1	0	1	0
hsa-miR-32	MIMAT0000090	NM_175931	CBFA2T3	core-binding factor, runt domain, alpha subunit 2; translocated to, 3	0	0	1	0	0	0	1	1	0	1	0
hsa-miR-32	MIMAT0000090	NM_173822	FAM126B	family with sequence similarity 126, member B	0	0	0	0	0	0	1	1	0	1	1
hsa-miR-32	MIMAT0000090	NM_033427	CTTNBP2	cortactin binding protein 2	0	0	0	0	0	0	1	1	0	1	1
hsa-miR-32	MIMAT0000090	NM_173808	NEGR1	neuronal growth regulator 1	0	0	0	0	0	0	1	1	0	1	1
hsa-miR-32	MIMAT0000090	NM_052911	ESCO1	establishment of cohesion 1 homolog 1 (S. cerevisiae)	0	0	1	1	0	0	0	1	0	1	0
hsa-miR-32	MIMAT0000090	NM_173794	FUNDC1	FUN14 domain containing 1	0	0	0	0	0	0	1	1	0	1	1
hsa-miR-32	MIMAT0000090	NM_052966	FAM129A	family with sequence similarity 129, member A	0	0	1	1	0	0	0	1	0	1	0
hsa-miR-32	MIMAT0000090	NM_057170	GIT2	G protein-coupled receptor kinase interactor 2	0	0	1	0	0	0	1	1	0	1	0
hsa-miR-32	MIMAT0000090	NM_033122	C4orf35	chromosome 4 open reading frame 35	0	0	1	1	0	0	0	1	0	1	0
hsa-miR-32	MIMAT0000090	NM_033102	SLC45A3	solute carrier family 45, member 3	0	0	0	0	0	0	1	1	0	1	1
hsa-miR-32	MIMAT0000090	NM_033020	TRIM33	tripartite motif-containing 33	0	0	1	1	0	0	0	1	0	1	0
hsa-miR-32	MIMAT0000090	NM_181458	PAX3	paired box 3	0	0	1	0	0	0	1	1	0	1	0
hsa-miR-32	MIMAT0000090	NM_181457	PAX3	paired box 3	0	0	1	0	0	0	1	1	0	1	0
hsa-miR-32	MIMAT0000090	NM_032638	GATA2	GATA binding protein 2	0	0	1	0	0	0	0	1	0	1	1
hsa-miR-32	MIMAT0000090	NM_032777	GPR124	G protein-coupled receptor 124	0	0	0	0	0	0	1	1	0	1	1
hsa-miR-32	MIMAT0000090	NM_032961	PCDH10	protocadherin 10	0	0	0	0	0	0	1	1	0	1	1
hsa-miR-32	MIMAT0000090	NM_178812	MTDH	metadherin	0	0	0	0	0	0	1	1	0	1	1
hsa-miR-32	MIMAT0000090	NM_178566	ZDHHC21	zinc finger, DHHC-type containing 21	0	0	0	0	0	0	1	1	0	1	1
hsa-miR-32	MIMAT0000090	NM_178153	DCX	doublecortex; lissencephaly, X-linked (doublecortin)	0	0	1	0	0	0	1	1	0	1	0
hsa-miR-32	MIMAT0000090	NM_178151	DCX	doublecortex; lissencephaly, X-linked (doublecortin)	0	0	1	0	0	0	1	1	0	1	0
hsa-miR-32	MIMAT0000090	NM_057175	NARG1	NMDA receptor regulated 1	0	0	0	0	0	0	1	1	0	1	1
hsa-miR-32	MIMAT0000090	NM_021096	CACNA1I	calcium channel, voltage-dependent, T type, alpha 1I subunit	0	0	1	1	0	0	0	1	0	1	0
hsa-miR-32	MIMAT0000090	NM_001427	EN2	engrailed homeobox 2	0	0	0	0	0	0	1	1	0	1	1
hsa-miR-32	MIMAT0000090	NM_002736	PRKAR2B	protein kinase, cAMP-dependent, regulatory, type II, beta	0	0	0	0	0	0	1	1	0	1	1
hsa-miR-32	MIMAT0000090	NM_002844	PTPRK	protein tyrosine phosphatase, receptor type, K	0	0	1	1	0	0	0	1	0	1	0
hsa-miR-32	MIMAT0000090	NM_002948	RPL15	ribosomal protein L15	0	0	1	1	0	0	0	1	0	1	0
hsa-miR-32	MIMAT0000090	NM_003017	SFRS3	splicing factor, arginine/serine-rich 3	0	0	1	1	0	0	0	1	0	1	0
hsa-miR-32	MIMAT0000090	NM_003042	SLC6A1	solute carrier family 6 (neurotransmitter transporter, GABA), member 1	0	0	0	0	0	0	1	1	0	1	1
hsa-miR-32	MIMAT0000090	NM_003047	SLC9A1	solute carrier family 9 (sodium/hydrogen exchanger), member 1 (antiporter, Na+/H+, amiloride sensitive)	0	0	1	0	0	0	0	1	0	1	1
hsa-miR-32	MIMAT0000090	NM_003082	SNAPC1	small nuclear RNA activating complex, polypeptide 1, 43kDa	0	0	0	1	0	0	1	1	0	0	1
hsa-miR-32	MIMAT0000090	NM_003100	SNX2	sorting nexin 2	0	0	0	0	0	0	1	1	0	1	1
hsa-miR-32	MIMAT0000090	NM_003162	STRN	striatin, calmodulin binding protein	0	0	0	0	0	0	1	1	0	1	1
hsa-miR-32	MIMAT0000090	NM_003286	TOP1	topoisomerase (DNA) I	0	0	0	0	0	0	1	1	0	1	1
hsa-miR-32	MIMAT0000090	NM_003458	BSN	bassoon (presynaptic cytomatrix protein)	0	0	1	0	0	0	0	1	0	1	1
hsa-miR-32	MIMAT0000090	NM_003487	TAF15	TAF15 RNA polymerase II, TATA box binding protein (TBP)-associated factor, 68kDa	0	0	0	0	0	0	1	1	0	1	1
hsa-miR-32	MIMAT0000090	NM_003565	ULK1	unc-51-like kinase 1 (C. elegans)	0	0	0	0	0	0	1	1	0	1	1
hsa-miR-32	MIMAT0000090	NM_002501	NFIX	nuclear factor I/X (CCAAT-binding transcription factor)	0	0	1	0	0	0	0	1	0	1	1
hsa-miR-32	MIMAT0000090	NM_002500	NEUROD1	neurogenic differentiation 1	0	0	0	0	0	0	1	1	0	1	1
hsa-miR-32	MIMAT0000090	NM_001547	IFIT2	interferon-induced protein with tetratricopeptide repeats 2	0	0	1	1	0	0	0	1	0	1	0
hsa-miR-32	MIMAT0000090	NM_001564	ING2	inhibitor of growth family, member 2	0	0	0	0	0	0	1	1	0	1	1
hsa-miR-32	MIMAT0000090	NM_001699	AXL	AXL receptor tyrosine kinase	0	0	1	1	0	0	0	1	0	1	0
hsa-miR-32	MIMAT0000090	NM_001854	COL11A1	collagen, type XI, alpha 1	0	0	1	1	0	0	0	1	0	1	0
hsa-miR-32	MIMAT0000090	NM_001858	COL19A1	collagen, type XIX, alpha 1	0	0	1	1	0	0	0	1	0	1	0
hsa-miR-32	MIMAT0000090	NM_001918	DBT	dihydrolipoamide branched chain transacylase E2	0	0	1	1	0	0	0	1	0	1	0
hsa-miR-32	MIMAT0000090	NM_001946	DUSP6	dual specificity phosphatase 6	0	0	0	0	0	0	1	1	0	1	1
hsa-miR-32	MIMAT0000090	NM_002017	FLI1	Friend leukemia virus integration 1	0	0	0	0	0	0	1	1	0	1	1
hsa-miR-32	MIMAT0000090	NM_002114	HIVEP1	human immunodeficiency virus type I enhancer binding protein 1	0	0	0	0	0	0	1	1	0	1	1
hsa-miR-32	MIMAT0000090	NM_002228	JUN	jun oncogene	0	0	0	0	0	0	1	1	0	1	1
hsa-miR-32	MIMAT0000090	NM_002270	TNPO1	transportin 1	0	0	1	0	0	0	0	1	0	1	1
hsa-miR-32	MIMAT0000090	NM_002395	ME1	malic enzyme 1, NADP(+)-dependent, cytosolic	0	0	1	1	0	0	0	1	0	1	0
hsa-miR-32	MIMAT0000090	NM_002473	MYH9	myosin, heavy chain 9, non-muscle	0	0	1	0	0	0	0	1	0	1	1
hsa-miR-32	MIMAT0000090	NM_003590	CUL3	cullin 3	0	0	0	0	0	0	1	1	0	1	1
hsa-miR-32	MIMAT0000090	NM_003654	CHST1	carbohydrate (keratan sulfate Gal-6) sulfotransferase 1	0	0	1	1	0	0	0	1	0	1	0
hsa-miR-32	MIMAT0000090	NM_003749	IRS2	insulin receptor substrate 2	0	0	0	0	0	0	1	1	0	1	1
hsa-miR-32	MIMAT0000090	NM_004456	EZH2	enhancer of zeste homolog 2 (Drosophila)	0	0	0	0	0	0	1	1	0	1	1
hsa-miR-32	MIMAT0000090	NM_004468	FHL3	four and a half LIM domains 3	0	0	0	0	0	0	1	1	0	1	1
hsa-miR-32	MIMAT0000090	NM_004567	PFKFB4	6-phosphofructo-2-kinase/fructose-2,6-biphosphatase 4	0	0	0	0	0	0	1	1	0	1	1
hsa-miR-32	MIMAT0000090	NM_004660	DDX3Y	DEAD (Asp-Glu-Ala-Asp) box polypeptide 3, Y-linked	0	0	1	0	0	0	0	1	0	1	1
hsa-miR-32	MIMAT0000090	NM_004719	SFRS2IP	splicing factor, arginine/serine-rich 2, interacting protein	0	0	1	1	0	0	0	1	0	1	0
hsa-miR-32	MIMAT0000090	NM_004796	NRXN3	neurexin 3	0	0	1	1	0	0	0	1	0	1	0
hsa-miR-32	MIMAT0000090	NM_004922	SEC24C	SEC24 related gene family, member C (S. cerevisiae)	0	0	0	0	0	0	1	1	0	1	1
hsa-miR-32	MIMAT0000090	NM_004973	JARID2	jumonji, AT rich interactive domain 2	0	0	1	0	0	0	1	1	0	1	0
hsa-miR-32	MIMAT0000090	NM_005087	FXR1	fragile X mental retardation, autosomal homolog 1	0	0	1	1	0	0	0	1	0	1	0
hsa-miR-32	MIMAT0000090	NM_005109	OXSR1	oxidative-stress responsive 1	0	0	0	0	0	0	1	1	0	1	1
hsa-miR-32	MIMAT0000090	NM_005110	GFPT2	glutamine-fructose-6-phosphate transaminase 2	0	0	0	0	0	0	1	1	0	1	1
hsa-miR-32	MIMAT0000090	NM_005159	ACTC1	actin, alpha, cardiac muscle 1	0	0	1	1	0	0	0	1	0	1	0
hsa-miR-32	MIMAT0000090	NM_005324	H3F3B	H3 histone, family 3B (H3.3B)	0	0	0	0	0	0	1	1	0	1	1
hsa-miR-32	MIMAT0000090	NM_004447	EPS8	epidermal growth factor receptor pathway substrate 8	0	0	0	0	0	0	1	1	0	1	1
hsa-miR-32	MIMAT0000090	NM_004364	CEBPA	CCAAT/enhancer binding protein (C/EBP), alpha	0	0	0	0	0	0	1	1	0	1	1
hsa-miR-32	MIMAT0000090	NM_003764	STX11	syntaxin 11	0	0	1	1	0	0	0	1	0	1	0
hsa-miR-32	MIMAT0000090	NM_003812	ADAM23	ADAM metallopeptidase domain 23	0	0	0	0	0	0	1	1	0	1	1
hsa-miR-32	MIMAT0000090	NM_001124	ADM	adrenomedullin	0	0	0	1	0	0	1	1	0	0	1
hsa-miR-32	MIMAT0000090	NM_003941	WASL	Wiskott-Aldrich syndrome-like	0	0	1	1	0	0	0	1	0	1	0
hsa-miR-32	MIMAT0000090	NM_003942	RPS6KA4	ribosomal protein S6 kinase, 90kDa, polypeptide 4	0	0	1	0	0	0	1	1	0	1	0
hsa-miR-32	MIMAT0000090	NM_003947	KALRN	kalirin, RhoGEF kinase	0	0	1	0	0	0	1	1	0	1	0
hsa-miR-32	MIMAT0000090	NM_003983	SLC7A6	solute carrier family 7 (cationic amino acid transporter, y+ system), member 6	0	0	1	0	0	0	1	1	0	1	0
hsa-miR-32	MIMAT0000090	NM_004035	ACOX1	acyl-Coenzyme A oxidase 1, palmitoyl	0	0	1	1	0	0	0	1	0	1	0
hsa-miR-32	MIMAT0000090	NM_004202	TMSB4Y	thymosin beta 4, Y-linked	0	0	1	1	0	0	0	1	0	1	0
hsa-miR-32	MIMAT0000090	NM_004236	COPS2	COP9 constitutive photomorphogenic homolog subunit 2 (Arabidopsis)	0	0	0	0	0	0	1	1	0	1	1
hsa-miR-32	MIMAT0000090	NM_004326	BCL9	B-cell CLL/lymphoma 9	0	0	0	0	0	0	1	1	0	1	1
hsa-miR-32	MIMAT0000090	NM_004337	OSGIN2	oxidative stress induced growth inhibitor family member 2	0	0	1	1	0	0	0	1	0	1	0
hsa-miR-32	MIMAT0000090	NM_004338	C18orf1	chromosome 18 open reading frame 1	0	0	1	0	0	0	1	1	0	1	0
hsa-miR-32	MIMAT0000090	NM_005329	HAS3	hyaluronan synthase 3	0	0	0	0	0	0	1	1	0	1	1
hsa-miR-32	MIMAT0000090	NM_000081	LYST	lysosomal trafficking regulator	0	0	0	1	0	0	0	1	0	1	1
hsa-miR-32	MIMAT0000090	NM_001003674	C18orf1	chromosome 18 open reading frame 1	0	0	0	0	0	0	1	1	0	1	1
hsa-miR-32	MIMAT0000090	NM_001003675	C18orf1	chromosome 18 open reading frame 1	0	0	1	0	0	0	1	1	0	1	0
hsa-miR-32	MIMAT0000090	NM_001003794	MGLL	monoglyceride lipase	0	0	1	0	0	0	1	1	0	0	1
hsa-miR-32	MIMAT0000090	NM_001003818	TRIM6	tripartite motif-containing 6	0	0	1	1	0	0	0	1	0	1	0
hsa-miR-32	MIMAT0000090	NM_001004067	NOMO3	NODAL modulator 3	0	0	1	0	0	0	1	1	0	0	1
hsa-miR-32	MIMAT0000090	NM_001004301	ZNF813	zinc finger protein 813	0	0	1	1	0	0	0	1	0	1	0
hsa-miR-32	MIMAT0000090	NM_001005407	CACNA1H	calcium channel, voltage-dependent, T type, alpha 1H subunit	0	0	0	0	0	0	1	1	0	1	1
hsa-miR-32	MIMAT0000090	NM_001006944	RPS6KA4	ribosomal protein S6 kinase, 90kDa, polypeptide 4	0	0	1	0	0	0	0	1	0	1	1
hsa-miR-32	MIMAT0000090	NM_001012423	GOLGA8E	golgi autoantigen, golgin subfamily a, 8E	0	0	0	1	0	0	0	1	0	1	1
hsa-miR-32	MIMAT0000090	NM_001013399	CCNC	cyclin C	0	0	1	1	0	0	0	1	0	0	1
hsa-miR-32	MIMAT0000090	NM_001013415	FBXW7	F-box and WD repeat domain containing 7	0	0	1	1	0	0	0	1	0	1	0
hsa-miR-32	MIMAT0000090	NM_001013439	FXR1	fragile X mental retardation, autosomal homolog 1	0	0	1	1	0	0	0	1	0	1	0
hsa-miR-32	MIMAT0000090	NM_001015880	PAPSS2	3"-phosphoadenosine 5"-phosphosulfate synthase 2	0	0	1	1	0	0	0	1	0	1	0
hsa-miR-32	MIMAT0000090	NM_001002909	GPATCH8	G patch domain containing 8	0	0	0	0	0	0	1	1	0	1	1
hsa-miR-32	MIMAT0000090	NM_001001938	C9orf47	chromosome 9 open reading frame 47	0	0	1	1	0	0	0	1	0	1	0
hsa-miR-32	MIMAT0000090	NM_000089	COL1A2	collagen, type I, alpha 2	0	0	0	0	0	0	1	1	0	1	1
hsa-miR-32	MIMAT0000090	NM_000093	COL5A1	collagen, type V, alpha 1	0	0	1	0	0	0	0	1	0	1	1
hsa-miR-32	MIMAT0000090	NM_000139	MS4A2	membrane-spanning 4-domains, subfamily A, member 2 (Fc fragment of IgE, high affinity I, receptor for; beta polypeptide)	0	0	1	1	0	0	0	1	0	1	0
hsa-miR-32	MIMAT0000090	NM_000152	GAA	glucosidase, alpha; acid (Pompe disease, glycogen storage disease type II)	0	0	1	1	0	0	0	1	0	1	0
hsa-miR-32	MIMAT0000090	NM_000163	GHR	growth hormone receptor	0	0	1	1	0	0	0	1	0	1	0
hsa-miR-32	MIMAT0000090	NM_000248	MITF	microphthalmia-associated transcription factor	0	0	0	0	0	0	1	1	0	1	1
hsa-miR-32	MIMAT0000090	NM_000271	NPC1	Niemann-Pick disease, type C1	0	0	0	0	0	0	1	1	0	1	1
hsa-miR-32	MIMAT0000090	NM_000329	RPE65	retinal pigment epithelium-specific protein 65kDa	0	0	1	1	0	0	0	1	0	1	0
hsa-miR-32	MIMAT0000090	NM_000448	RAG1	recombination activating gene 1	0	0	1	1	0	0	0	1	0	1	0
hsa-miR-32	MIMAT0000090	NM_000474	TWIST1	twist homolog 1 (acrocephalosyndactyly 3; Saethre-Chotzen syndrome) (Drosophila)	0	0	0	0	0	0	1	1	0	1	1
hsa-miR-32	MIMAT0000090	NM_000611	CD59	CD59 molecule, complement regulatory protein	0	0	1	1	0	0	0	1	0	1	0
hsa-miR-32	MIMAT0000090	NM_000617	SLC11A2	solute carrier family 11 (proton-coupled divalent metal ion transporters), member 2	0	0	1	1	0	0	0	1	0	1	0
hsa-miR-32	MIMAT0000090	NM_001001684	FLJ45831	FLJ45831 protein	0	0	1	1	0	0	0	1	0	1	0
hsa-miR-32	MIMAT0000090	NM_001023567	GOLGA8B	golgi autoantigen, golgin subfamily a, 8B	0	0	1	0	0	0	0	1	0	1	1
hsa-miR-32	MIMAT0000090	NM_001032280	TFAP2A	transcription factor AP-2 alpha (activating enhancer binding protein 2 alpha)	0	0	1	0	0	0	0	1	0	1	1
hsa-miR-32	MIMAT0000090	NM_001033578	SGK3	serum/glucocorticoid regulated kinase family, member 3	0	0	1	1	0	0	0	1	0	1	0
hsa-miR-32	MIMAT0000090	NM_001076786	QSER1	glutamine and serine rich 1	0	0	1	0	0	0	0	1	0	1	1
hsa-miR-32	MIMAT0000090	NM_001079526	IKZF2	IKAROS family zinc finger 2 (Helios)	0	0	1	0	0	0	0	1	0	1	1
hsa-miR-32	MIMAT0000090	NM_001079803	GAA	glucosidase, alpha; acid (Pompe disease, glycogen storage disease type II)	0	0	1	1	0	0	0	1	0	1	0
hsa-miR-32	MIMAT0000090	NM_001079804	GAA	glucosidase, alpha; acid (Pompe disease, glycogen storage disease type II)	0	0	1	1	0	0	0	1	0	1	0
hsa-miR-32	MIMAT0000090	NM_001080395	AATK	apoptosis-associated tyrosine kinase	0	0	1	1	0	0	0	1	0	1	0
hsa-miR-32	MIMAT0000090	NM_001080481	USP45	ubiquitin specific peptidase 45	0	0	1	1	0	0	0	1	0	1	0
hsa-miR-32	MIMAT0000090	NM_001081676	SCN3A	sodium channel, voltage-gated, type III, alpha subunit	0	0	1	0	0	0	0	1	0	1	1
hsa-miR-32	MIMAT0000090	NM_001082577	RBM9	RNA binding motif protein 9	0	0	1	0	0	0	0	1	0	1	1
hsa-miR-32	MIMAT0000090	NM_001190	BCAT2	branched chain aminotransferase 2, mitochondrial	0	0	0	1	0	0	1	1	0	0	1
hsa-miR-32	MIMAT0000090	NM_001194	HCN2	hyperpolarization activated cyclic nucleotide-gated potassium channel 2	0	0	1	0	0	0	0	1	0	1	1
hsa-miR-32	MIMAT0000090	NM_001204	BMPR2	bone morphogenetic protein receptor, type II (serine/threonine kinase)	0	0	1	0	0	0	0	1	0	1	1
hsa-miR-32	MIMAT0000090	NM_001256	CDC27	cell division cycle 27 homolog (S. cerevisiae)	0	0	1	1	0	0	0	1	0	1	0
hsa-miR-32	MIMAT0000090	NM_001277	CHKA	choline kinase alpha	0	0	1	1	0	0	0	1	0	1	0
hsa-miR-32	MIMAT0000090	NM_001076785	SLC7A6	solute carrier family 7 (cationic amino acid transporter, y+ system), member 6	0	0	1	0	0	0	0	1	0	1	1
hsa-miR-32	MIMAT0000090	NM_001048200	HIPK3	homeodomain interacting protein kinase 3	0	0	0	1	0	0	0	1	0	1	1
hsa-miR-32	MIMAT0000090	NM_001034841	LOC162073	hypothetical protein LOC162073	0	0	1	0	0	0	0	1	0	1	1
hsa-miR-32	MIMAT0000090	NM_001034845	GALNT17	polypeptide N-acetylgalactosaminyltransferase 17	0	0	1	1	0	0	0	1	0	1	0
hsa-miR-32	MIMAT0000090	NM_001034915	RBM35A	RNA binding motif protein 35A	0	0	1	1	0	0	0	1	0	1	0
hsa-miR-32	MIMAT0000090	NM_001036	RYR3	ryanodine receptor 3	0	0	0	0	0	0	1	1	0	1	1
hsa-miR-32	MIMAT0000090	NM_001040110	NRF1	nuclear respiratory factor 1	0	0	1	0	0	0	0	1	0	1	1
hsa-miR-32	MIMAT0000090	NM_001040284	PAPD5	PAP associated domain containing 5	0	0	1	1	0	0	0	1	0	1	0
hsa-miR-32	MIMAT0000090	NM_001040285	PAPD5	PAP associated domain containing 5	0	0	1	1	0	0	0	1	0	1	0
hsa-miR-32	MIMAT0000090	NM_001040665	STEAP2	six transmembrane epithelial antigen of the prostate 2	0	0	1	1	0	0	0	1	0	1	0
hsa-miR-32	MIMAT0000090	NM_001040666	STEAP2	six transmembrane epithelial antigen of the prostate 2	0	0	1	1	0	0	0	1	0	1	0
hsa-miR-32	MIMAT0000090	NM_001040712	PTPRD	protein tyrosine phosphatase, receptor type, D	0	0	1	0	0	0	0	1	0	1	1
hsa-miR-32	MIMAT0000090	NM_001042555	FRS2	fibroblast growth factor receptor substrate 2	0	0	1	0	0	0	0	1	0	1	1
hsa-miR-32	MIMAT0000090	NM_001042749	STAG2	stromal antigen 2	0	0	1	0	0	0	0	1	0	1	1
hsa-miR-32	MIMAT0000090	NM_001046	SLC12A2	solute carrier family 12 (sodium/potassium/chloride transporters), member 2	0	0	0	0	0	0	1	1	0	1	1
hsa-miR-32	MIMAT0000090	NM_001356	DDX3X	DEAD (Asp-Glu-Ala-Asp) box polypeptide 3, X-linked	0	0	0	1	0	0	0	1	0	1	1
hsa-miR-32	MIMAT0000090	NM_005382	NEFM	neurofilament, medium polypeptide 150kDa	0	0	0	1	0	0	1	1	0	0	1
hsa-miR-32	MIMAT0000090	NM_015032	PDS5B	PDS5, regulator of cohesion maintenance, homolog B (S. cerevisiae)	0	0	0	0	0	0	1	1	0	1	1
hsa-miR-32	MIMAT0000090	NM_016075	VPS36	vacuolar protein sorting 36 homolog (S. cerevisiae)	0	0	1	1	0	0	0	1	0	1	0
hsa-miR-32	MIMAT0000090	NM_016249	MAGEC2	melanoma antigen family C, 2	0	0	1	1	0	0	0	1	0	1	0
hsa-miR-32	MIMAT0000090	NM_016422	RNF141	ring finger protein 141	0	0	0	1	0	0	0	1	0	1	1
hsa-miR-32	MIMAT0000090	NM_016598	ZDHHC3	zinc finger, DHHC-type containing 3	0	0	0	0	0	0	1	1	0	1	1
hsa-miR-32	MIMAT0000090	NM_016603	FAM13B1	family with sequence similarity 13, member B1	0	0	0	0	0	0	1	1	0	1	1
hsa-miR-32	MIMAT0000090	NM_016931	NOX4	NADPH oxidase 4	0	0	0	1	0	0	1	1	0	0	1
hsa-miR-32	MIMAT0000090	NM_017455	NPTN	neuroplastin	0	0	0	1	0	0	1	1	0	1	0
hsa-miR-32	MIMAT0000090	NM_017592	MED29	mediator complex subunit 29	0	0	1	0	0	0	0	1	0	1	1
hsa-miR-32	MIMAT0000090	NM_017607	PPP1R12C	protein phosphatase 1, regulatory (inhibitor) subunit 12C	0	0	0	0	0	0	1	1	0	1	1
hsa-miR-32	MIMAT0000090	NM_017617	NOTCH1	Notch homolog 1, translocation-associated (Drosophila)	0	0	0	0	0	0	1	1	0	1	1
hsa-miR-32	MIMAT0000090	NM_017633	FAM46A	family with sequence similarity 46, member A	0	0	1	1	0	0	0	1	0	1	0
hsa-miR-32	MIMAT0000090	NM_017635	SUV420H1	suppressor of variegation 4-20 homolog 1 (Drosophila)	0	0	0	0	0	0	1	1	0	1	1
hsa-miR-32	MIMAT0000090	NM_017752	TBC1D8B	TBC1 domain family, member 8B (with GRAM domain)	0	0	1	1	0	0	0	1	0	1	0
hsa-miR-32	MIMAT0000090	NM_015906	TRIM33	tripartite motif-containing 33	0	0	1	1	0	0	0	1	0	1	0
hsa-miR-32	MIMAT0000090	NM_015886	PI15	peptidase inhibitor 15	0	0	1	1	0	0	0	1	0	1	0
hsa-miR-32	MIMAT0000090	NM_015052	HECW1	HECT, C2 and WW domain containing E3 ubiquitin protein ligase 1	0	0	0	0	0	0	1	1	0	1	1
hsa-miR-32	MIMAT0000090	NM_015137	EFR3A	EFR3 homolog A (S. cerevisiae)	0	0	1	1	0	0	0	1	0	1	0
hsa-miR-32	MIMAT0000090	NM_015153	PHF3	PHD finger protein 3	0	0	0	0	0	0	1	1	0	1	1
hsa-miR-32	MIMAT0000090	NM_015176	FBXO28	F-box protein 28	0	0	0	0	0	0	1	1	0	1	1
hsa-miR-32	MIMAT0000090	NM_015206	KIAA1024	KIAA1024	0	0	1	1	0	0	0	1	0	1	0
hsa-miR-32	MIMAT0000090	NM_015238	WWC1	WW and C2 domain containing 1	0	0	0	0	0	0	1	1	0	1	1
hsa-miR-32	MIMAT0000090	NM_015353	KCTD2	potassium channel tetramerisation domain containing 2	0	0	1	1	0	0	0	1	0	1	0
hsa-miR-32	MIMAT0000090	NM_015375	RIPK5	receptor interacting protein kinase 5	0	0	1	1	0	0	0	1	0	1	0
hsa-miR-32	MIMAT0000090	NM_015429	ABI3BP	ABI gene family, member 3 (NESH) binding protein	0	0	0	0	0	0	1	1	0	1	1
hsa-miR-32	MIMAT0000090	NM_015457	ZDHHC5	zinc finger, DHHC-type containing 5	0	0	0	0	0	0	1	1	0	1	1
hsa-miR-32	MIMAT0000090	NM_015458	MTMR9	myotubularin related protein 9	0	0	1	1	0	0	0	1	0	1	0
hsa-miR-32	MIMAT0000090	NM_015549	PLEKHG3	pleckstrin homology domain containing, family G (with RhoGef domain) member 3	0	0	1	1	0	0	0	1	0	1	0
hsa-miR-32	MIMAT0000090	NM_015567	SLITRK5	SLIT and NTRK-like family, member 5	0	0	1	1	0	0	0	1	0	1	0
hsa-miR-32	MIMAT0000090	NM_017901	TPCN1	two pore segment channel 1	0	0	0	0	0	0	1	1	0	1	1
hsa-miR-32	MIMAT0000090	NM_017923	MARCH1	membrane-associated ring finger (C3HC4) 1	0	0	1	0	0	0	1	1	0	0	1
hsa-miR-32	MIMAT0000090	NM_018013	SOBP	sine oculis binding protein homolog (Drosophila)	0	0	1	0	0	0	1	1	0	0	1
hsa-miR-32	MIMAT0000090	NM_020403	PCDH9	protocadherin 9	0	0	0	0	0	0	1	1	0	1	1
hsa-miR-32	MIMAT0000090	NM_020429	SMURF1	SMAD specific E3 ubiquitin protein ligase 1	0	0	1	0	0	0	0	1	0	1	1
hsa-miR-32	MIMAT0000090	NM_020526	EPHA8	EPH receptor A8	0	0	0	0	0	0	1	1	0	1	1
hsa-miR-32	MIMAT0000090	NM_020689	SLC24A3	solute carrier family 24 (sodium/potassium/calcium exchanger), member 3	0	0	0	0	0	0	1	1	0	1	1
hsa-miR-32	MIMAT0000090	NM_006575	MAP4K5	mitogen-activated protein kinase kinase kinase kinase 5	0	0	0	0	0	0	1	1	0	1	1
hsa-miR-32	MIMAT0000090	NM_020699	GATAD2B	GATA zinc finger domain containing 2B	0	0	0	0	0	0	1	1	0	1	1
hsa-miR-32	MIMAT0000090	NM_020713	ZNF512B	zinc finger protein 512B	0	0	0	0	0	0	1	1	0	1	1
hsa-miR-32	MIMAT0000090	NM_020732	ARID1B	AT rich interactive domain 1B (SWI1-like)	0	0	0	1	0	0	1	1	0	1	0
hsa-miR-32	MIMAT0000090	NM_020744	MTA3	metastasis associated 1 family, member 3	0	0	0	0	0	0	1	1	0	1	1
hsa-miR-32	MIMAT0000090	NM_020818	KIAA1409	KIAA1409	0	0	0	0	0	0	1	1	0	1	1
hsa-miR-32	MIMAT0000090	NM_020819	FAM135A	family with sequence similarity 135, member A	0	0	0	1	0	0	0	1	0	1	1
hsa-miR-32	MIMAT0000090	NM_020845	PITPNM2	phosphatidylinositol transfer protein, membrane-associated 2	0	0	1	0	0	0	0	1	0	1	1
hsa-miR-32	MIMAT0000090	NM_020892	DTX2	deltex homolog 2 (Drosophila)	0	0	0	0	0	0	1	1	0	1	1
hsa-miR-32	MIMAT0000090	NM_020184	CNNM4	cyclin M4	0	0	0	0	0	0	1	1	0	1	1
hsa-miR-32	MIMAT0000090	NM_020182	PMEPA1	prostate transmembrane protein, androgen induced 1	0	0	0	0	0	0	1	1	0	1	1
hsa-miR-32	MIMAT0000090	NM_018017	C10orf118	chromosome 10 open reading frame 118	0	0	1	0	0	0	0	1	0	1	1
hsa-miR-32	MIMAT0000090	NM_018046	AGGF1	angiogenic factor with G patch and FHA domains 1	0	0	0	0	0	0	1	1	0	1	1
hsa-miR-32	MIMAT0000090	NM_018205	LRRC20	leucine rich repeat containing 20	0	0	0	0	0	0	1	1	0	1	1
hsa-miR-32	MIMAT0000090	NM_018214	LRRC1	leucine rich repeat containing 1	0	0	1	1	0	0	0	1	0	1	0
hsa-miR-32	MIMAT0000090	NM_018299	UBE2W	ubiquitin-conjugating enzyme E2W (putative)	0	0	1	1	0	0	1	1	0	0	0
hsa-miR-32	MIMAT0000090	NM_018442	IQWD1	IQ motif and WD repeats 1	0	0	1	1	0	0	0	1	0	1	0
hsa-miR-32	MIMAT0000090	NM_018448	CAND1	cullin-associated and neddylation-dissociated 1	0	0	1	1	0	0	0	1	0	1	0
hsa-miR-32	MIMAT0000090	NM_018682	MLL5	myeloid/lymphoid or mixed-lineage leukemia 5 (trithorax homolog, Drosophila)	0	0	0	0	0	0	1	1	0	1	1
hsa-miR-32	MIMAT0000090	NM_018970	GPR85	G protein-coupled receptor 85	0	0	0	0	0	0	1	1	0	1	1
hsa-miR-32	MIMAT0000090	NM_018999	KIAA1128	KIAA1128	0	0	1	1	0	0	0	1	0	1	0
hsa-miR-32	MIMAT0000090	NM_019058	DDIT4	DNA-damage-inducible transcript 4	0	0	0	0	0	0	1	1	0	1	1
hsa-miR-32	MIMAT0000090	NM_020066	FMN2	formin 2	0	0	1	0	0	0	0	1	0	1	1
hsa-miR-32	MIMAT0000090	NM_020144	PAPOLB	poly(A) polymerase beta (testis specific)	0	0	0	0	0	0	1	1	0	1	1
hsa-miR-32	MIMAT0000090	NM_020896	OSBPL5	oxysterol binding protein-like 5	0	0	0	0	0	0	1	1	0	1	1
hsa-miR-32	MIMAT0000090	NM_005399	PRKAB2	protein kinase, AMP-activated, beta 2 non-catalytic subunit	0	0	0	0	0	0	1	1	0	1	1
hsa-miR-32	MIMAT0000090	NM_006203	PDE4D	phosphodiesterase 4D, cAMP-specific (phosphodiesterase E3 dunce homolog, Drosophila)	0	0	0	0	0	0	1	1	0	1	1
hsa-miR-32	MIMAT0000090	NM_006224	PITPNA	phosphatidylinositol transfer protein, alpha	0	0	0	0	0	0	1	1	0	1	1
hsa-miR-32	MIMAT0000090	NM_006300	ZNF230	zinc finger protein 230	0	0	1	1	0	0	0	1	0	1	0
hsa-miR-32	MIMAT0000090	NM_006352	ZNF238	zinc finger protein 238	0	0	0	0	0	0	1	1	0	1	1
hsa-miR-32	MIMAT0000090	NM_006451	PAIP1	poly(A) binding protein interacting protein 1	0	0	0	0	0	0	1	1	0	1	1
hsa-miR-32	MIMAT0000090	NM_006520	DYNLT3	dynein, light chain, Tctex-type 3	0	0	0	1	0	0	0	1	0	1	1
hsa-miR-32	MIMAT0000090	NM_006549	CAMKK2	calcium/calmodulin-dependent protein kinase kinase 2, beta	0	0	0	0	0	0	1	1	0	1	1
hsa-miR-32	MIMAT0000090	NM_006602	TCFL5	transcription factor-like 5 (basic helix-loop-helix)	0	0	1	1	0	0	0	1	0	1	0
hsa-miR-32	MIMAT0000090	NM_006603	STAG2	stromal antigen 2	0	0	1	0	0	0	1	1	0	1	0
hsa-miR-32	MIMAT0000090	NM_006620	HBS1L	HBS1-like (S. cerevisiae)	0	0	1	1	0	0	0	1	0	1	0
hsa-miR-32	MIMAT0000090	NM_006722	MITF	microphthalmia-associated transcription factor	0	0	1	0	0	0	1	1	0	1	0
hsa-miR-32	MIMAT0000090	NM_006759	UGP2	UDP-glucose pyrophosphorylase 2	0	0	1	1	0	0	1	1	0	0	0
hsa-miR-32	MIMAT0000090	NM_006805	HNRNPA0	heterogeneous nuclear ribonucleoprotein A0	0	0	0	0	0	0	1	1	0	1	1
hsa-miR-32	MIMAT0000090	NM_006121	KRT1	keratin 1 (epidermolytic hyperkeratosis)	0	0	0	0	0	0	1	1	0	1	1
hsa-miR-32	MIMAT0000090	NM_006060	IKZF1	IKAROS family zinc finger 1 (Ikaros)	0	0	1	0	0	0	0	1	0	1	1
hsa-miR-32	MIMAT0000090	NM_005442	EOMES	eomesodermin homolog (Xenopus laevis)	0	0	1	0	0	0	0	1	0	1	1
hsa-miR-32	MIMAT0000090	NM_005493	RANBP9	RAN binding protein 9	0	0	0	0	0	0	1	1	0	1	1
hsa-miR-32	MIMAT0000090	NM_005542	INSIG1	insulin induced gene 1	0	0	0	1	0	0	1	1	0	1	0
hsa-miR-32	MIMAT0000090	NM_005574	LMO2	LIM domain only 2 (rhombotin-like 1)	0	0	1	1	0	0	0	1	0	1	0
hsa-miR-32	MIMAT0000090	NM_005599	NHLH2	nescient helix loop helix 2	0	0	0	0	0	0	1	1	0	1	1
hsa-miR-32	MIMAT0000090	NM_005627	SGK1	serum/glucocorticoid regulated kinase 1	0	0	0	0	0	0	1	1	0	1	1
hsa-miR-32	MIMAT0000090	NM_005731	ARPC2	actin related protein 2/3 complex, subunit 2, 34kDa	0	0	0	0	0	0	1	1	0	1	1
hsa-miR-32	MIMAT0000090	NM_005734	HIPK3	homeodomain interacting protein kinase 3	0	0	1	1	0	0	0	1	0	1	0
hsa-miR-32	MIMAT0000090	NM_005801	EIF1	eukaryotic translation initiation factor 1	0	0	0	0	0	0	1	1	0	1	1
hsa-miR-32	MIMAT0000090	NM_005896	IDH1	isocitrate dehydrogenase 1 (NADP+), soluble	0	0	1	1	0	0	0	1	0	1	0
hsa-miR-32	MIMAT0000090	NM_005941	MMP16	matrix metallopeptidase 16 (membrane-inserted)	0	0	1	0	0	0	0	1	0	1	1
hsa-miR-32	MIMAT0000090	NM_005955	MTF1	metal-regulatory transcription factor 1	0	0	1	0	0	0	0	1	0	1	1
hsa-miR-32	MIMAT0000090	NM_005996	TBX3	T-box 3 (ulnar mammary syndrome)	0	0	0	0	0	0	1	1	0	1	1
hsa-miR-32	MIMAT0000090	NM_006895	HNMT	histamine N-methyltransferase	0	0	1	1	0	0	0	1	0	1	0
hsa-miR-32	MIMAT0000090	NM_007085	FSTL1	follistatin-like 1	0	0	0	0	0	0	1	1	0	1	1
hsa-miR-32	MIMAT0000090	NM_007114	TMF1	TATA element modulatory factor 1	0	0	1	1	0	0	0	1	0	1	0
hsa-miR-32	MIMAT0000090	NM_013381	TRHDE	thyrotropin-releasing hormone degrading enzyme	0	0	1	1	0	0	0	1	0	1	0
hsa-miR-32	MIMAT0000090	NM_014223	NFYC	nuclear transcription factor Y, gamma	0	0	0	0	0	0	1	1	0	1	1
hsa-miR-32	MIMAT0000090	NM_014287	NOMO1	NODAL modulator 1	0	0	1	0	0	0	1	1	0	0	1
hsa-miR-32	MIMAT0000090	NM_014309	RBM9	RNA binding motif protein 9	0	0	1	0	0	0	1	1	0	1	0
hsa-miR-32	MIMAT0000090	NM_014331	SLC7A11	solute carrier family 7, (cationic amino acid transporter, y+ system) member 11	0	0	1	1	0	0	0	1	0	1	0
hsa-miR-32	MIMAT0000090	NM_014372	RNF11	ring finger protein 11	0	0	1	1	0	0	0	1	0	1	0
hsa-miR-32	MIMAT0000090	NM_014574	STRN3	striatin, calmodulin binding protein 3	0	0	1	1	0	0	0	1	0	1	0
hsa-miR-32	MIMAT0000090	NM_014755	SERTAD2	SERTA domain containing 2	0	0	1	0	0	0	0	1	0	1	1
hsa-miR-32	MIMAT0000090	NM_014795	ZEB2	zinc finger E-box binding homeobox 2	0	0	0	0	0	0	1	1	0	1	1
hsa-miR-32	MIMAT0000090	NM_014810	CEP350	centrosomal protein 350kDa	0	0	1	0	0	0	0	1	0	1	1
hsa-miR-32	MIMAT0000090	NM_014844	KIAA0329	KIAA0329	0	0	1	0	0	0	0	1	0	1	1
hsa-miR-32	MIMAT0000090	NM_014924	KIAA0831	KIAA0831	0	0	0	0	0	0	1	1	0	1	1
hsa-miR-32	MIMAT0000090	NM_014997	KIAA0265	KIAA0265 protein	0	0	1	1	0	0	0	1	0	1	0
hsa-miR-32	MIMAT0000090	NM_013363	PCOLCE2	procollagen C-endopeptidase enhancer 2	0	0	1	1	0	0	0	1	0	1	0
hsa-miR-32	MIMAT0000090	NM_013262	MYLIP	myosin regulatory light chain interacting protein	0	0	0	0	0	0	1	1	0	1	1
hsa-miR-32	MIMAT0000090	NM_007249	KLF12	Kruppel-like factor 12	0	0	0	0	0	0	1	1	0	1	1
hsa-miR-32	MIMAT0000090	NM_007283	MGLL	monoglyceride lipase	0	0	1	0	0	0	1	1	0	1	0
hsa-miR-32	MIMAT0000090	NM_007292	ACOX1	acyl-Coenzyme A oxidase 1, palmitoyl	0	0	1	1	0	0	0	1	0	1	0
hsa-miR-32	MIMAT0000090	NM_007349	PAXIP1	PAX interacting (with transcription-activation domain) protein 1	0	0	1	1	0	0	0	1	0	1	0
hsa-miR-32	MIMAT0000090	NM_012082	ZFPM2	zinc finger protein, multitype 2	0	0	0	0	0	0	1	1	0	1	1
hsa-miR-32	MIMAT0000090	NM_012090	MACF1	microtubule-actin crosslinking factor 1	0	0	0	0	0	0	1	1	0	1	1
hsa-miR-32	MIMAT0000090	NM_012094	PRDX5	peroxiredoxin 5	0	0	0	0	0	0	1	1	0	1	1
hsa-miR-32	MIMAT0000090	NM_012098	ANGPTL2	angiopoietin-like 2	0	0	0	0	0	0	1	1	0	1	1
hsa-miR-32	MIMAT0000090	NM_012106	ARL2BP	ADP-ribosylation factor-like 2 binding protein	0	0	1	1	0	0	0	1	0	1	0
hsa-miR-32	MIMAT0000090	NM_012120	CD2AP	CD2-associated protein	0	0	1	1	0	0	0	1	0	0	1
hsa-miR-32	MIMAT0000090	NM_012264	TMEM184B	transmembrane protein 184B	0	0	1	0	0	0	1	1	0	0	1
hsa-miR-32	MIMAT0000090	NM_012398	PIP5K1C	phosphatidylinositol-4-phosphate 5-kinase, type I, gamma	0	0	1	0	0	0	0	1	0	1	1
hsa-miR-32	MIMAT0000090	NM_013257	SGK3	serum/glucocorticoid regulated kinase family, member 3	0	0	1	1	0	0	0	1	0	1	0
hsa-miR-32	MIMAT0000090	NM_015008	TMCC1	transmembrane and coiled-coil domain family 1	0	0	0	0	0	0	1	1	0	1	1
